# Supplementary material for: A Proteomic Study of Clavibacter Michiganensis Subsp. Michiganensis Culture Supernatants
Source: Proteomes. 2015 Nov 12;3(4):411–23. doi: 10.3390/proteomes3040411 (PMC5217389; doi:10.3390/proteomes3040411)
Supplement: Supplementary File 1 [file proteomes-03-00411-s001.xlsx]

## Sheet: Table S1. M9 total
Supplementary Table S1. Proteins identified in the supernatant of M9- and XMM-grown Clavibacter michiganensis subsp. michiganensis. Proteins were only regarded as identified, when these had at least 2 unique peptides and were found in two out of three samples.
Accession	Gene Name	Description	COG	ΣCoverage	Σ# Proteins	Σ# Unique Peptides	Σ# Peptides	Σ# PSMs	Molecular Function	Cellular Component	Biological Process	# AAs	MW [kDa]	calc. pI
A5CT14	CMM_2169	Putative RTX toxin	II.2.5	50.75	1	61	61	187	protein binding			2004	204.52	4.66553
A5CUC6	CMM_2630	DNA-directed RNA polymerase subunit beta'	III.2.1	55.58	1	70	70	355	DNA binding; catalytic activity		metabolic process	1299	143.177	6.56592
A5CQL3	CMM_1322	2-oxoglutarate dehydrogenase E1 component	I.1.3	63.76	1	59	59	360	catalytic activity		metabolic process	1272	139.893	5.89697
A5CU32	CMM_2536	Putative subtilisin-like serine protease,peptidase family S8	IV.6.1	61.22	1	52	52	950	catalytic activity; protein binding		metabolic process; regulation of biological process	1199	119.837	5.60498
A5CUC7	CMM_2631	DNA-directed RNA polymerase subunit beta	III.2.1	53.01	1	54	54	296	DNA binding; catalytic activity		metabolic process	1162	128.519	5.13525
A5CRG4	CMM_1621	Pyruvate dehydrogenase E1 component	I.1.3	67.51	1	48	48	330	catalytic activity		metabolic process	908	100.914	5.60498
A5CLP6	pCM2_0035	Putative rhs related protein	II.2.5	69.14	1	55	55	475			metabolic process	1134	118.653	5.61768
A5CUB7	CMM_2621	Elongation factor G	III.3.3	72.87	1	48	48	669	nucleotide binding; RNA binding; catalytic activity	cytoplasm	metabolic process	704	77.4225	5.14795
A5CN17	CMM_0431	Putative hemagglutinin/hemolysin-related protein	IV.4.6	80.9	1	44	44	302				754	76.8391	8.57275
A5CPF4	CMM_0915	Putative penicillin-binding protein	II.2.1	72.45	1	42	43	637	catalytic activity	membrane	metabolic process	744	79.2197	5.46533
A5CTX3	CMM_2478	60 kDa chaperonin	IV.4.1	75.51	1	49	49	759	nucleotide binding; protein binding	cytoplasm	metabolic process	539	56.7464	4.94482
A5CNL6	CMM_0627	Uncharacterized protein	II.2.5	34.22	1	44	44	260				2218	234.489	5.23682
A5CQZ8	CMM_1457	PepN protein	I.2.10	68.36	1	43	43	336	catalytic activity; metal ion binding		metabolic process	847	93.5848	4.65283
A5CPF8	CMM_0919	Putative penicillin-binding protein	II.2.1	81.54	1	41	42	1111	catalytic activity	membrane	metabolic process	845	88.0785	5.2749
A5CNK7	CMM_0619	Delta-1-pyrroline-5-carboxylate dehydrogenase /proline oxidase	I.2.3	53.21	1	48	48	185	catalytic activity		regulation of biological process; metabolic process	1216	131.163	5.22412
A5CRX5	CMM_1782	Carbamoyl-phosphate synthase large chain	I.3.2	51.64	1	45	45	242	nucleotide binding; metal ion binding; catalytic activity		metabolic process	1096	117.492	4.81787
A5CM86	CMM_0151	Chaperone protein DnaK	IV.4.1	79.45	1	46	46	390	nucleotide binding; protein binding		cell organization and biogenesis; metabolic process; response to stimulus	623	67.1123	4.79248
A5CP58	CMM_0819	Putative cell surface protein	II.2.8	59.17	1	37	37	186				872	89.1742	8.30908
A5CP34	CMM_0795	Putative extracellular nuclease/phosphatase	IV.6.3	65.4	1	37	37	406	catalytic activity		metabolic process	711	73.9147	5.10986
A5CT30	CMM_2185	Putative peptide ABC transporter, substrate-binding protein	IV.1.4	51.72	1	36	36	465	transporter activity		transport	611	66.3687	4.52588
A5CT41	CMM_2195	Glycine dehydrogenase (decarboxylating)	I.2.4	63.77	1	39	39	242	catalytic activity		metabolic process	991	104.953	5.49072
A5CU31	CMM_2535	Putative serine protease, peptidase family S8A	IV.6.1	43.8	1	32	32	200	catalytic activity; protein binding		metabolic process; regulation of biological process	1226	123.637	4.62744
A5CRU5	CMM_1752	30S ribosomal protein S1	III.3.1	76.45	1	34	34	237	RNA binding; structural molecule activity	ribosome	metabolic process	484	53.0465	4.85596
A5CU33	CMM_2537	Isocitrate dehydrogenase [NADP]	I.1.3	77.97	1	32	32	472	metal ion binding; catalytic activity; nucleotide binding		metabolic process	404	44.9466	5.12256
A5CNX6	CMM_0737	Catalase	IV.5.1	73.87	1	32	32	407	antioxidant activity; catalytic activity; metal ion binding		response to stimulus; metabolic process	509	56.6448	5.60498
A5CRS7	CMM_1734	Transketolase	I.1.2	63.65	1	32	32	429	catalytic activity; metal ion binding		metabolic process	696	75.0158	4.95752
A5CQ60	CMM_1169	ATP synthase subunit beta	IV.1.18	75.93	1	29	29	230	nucleotide binding; catalytic activity; transporter activity	membrane	metabolic process; transport	486	53.0182	4.93213
A5CTU6	CMM_2451	Uncharacterized protein	V.2.1	40.21	1	40	40	157				1241	134.825	6.29053
A5CRM2	CMM_1679	Uncharacterized protein	IV.7.3	56.69	1	32	32	145	catalytic activity	membrane	metabolic process	695	73.7063	5.07178
A5CSV4	CMM_2109	Beta-galactosidase	I.1.8	43.56	1	31	31	189	catalytic activity		metabolic process	1017	112.208	4.88135
A5CT49	CMM_2204	Uncharacterized protein	V.2.1	66.17	1	33	33	250	catalytic activity		metabolic process	949	97.8717	4.85596
A5CRZ5	CMM_1802	Alanine--tRNA ligase	III.3.2	47.8	1	31	31	186	RNA binding; nucleotide binding; catalytic activity; metal ion binding	cytoplasm	metabolic process	885	95.3323	5.18604
A5CS57	CMM_1865	Putative peptidoglycan glycosyltransferase/penicillin-binding protein	II.2.1	69.31	1	29	29	288	catalytic activity		metabolic process	593	62.4788	5.03369
A5CRK2	CMM_1659	Aconitate hydratase	I.1.3	34.15	1	29	29	201	catalytic activity; metal ion binding		metabolic process	937	100.761	4.7417
A5CPR3	CMM_1022	Putative secreted protein	II.2.9	64.04	1	27	27	239				609	63.4776	7.86963
A5CP78	CMM_0839	Putative membrane bound metalloprotease	IV.7.1	72.85	1	26	26	331	catalytic activity		metabolic process	431	45.2746	5.66846
A5CP96	CMM_0857	ATP-dependent protease, ATPase subunit	IV.4.2	57.78	1	37	38	208	nucleotide binding; protein binding; catalytic activity		metabolic process	836	92.3149	5.64307
A5CQX2	CMM_1431	Maltooligosyltrehalose synthase	I.1.5	57.22	1	35	35	157	catalytic activity		metabolic process	783	85.4222	4.88135
A5CLY4	CMM_0049	Beta-N-acetylhexosaminidase	I.1.9	59.8	1	28	28	165	catalytic activity		metabolic process	607	63.1882	6.44287
A5CSN9	CMM_2047	Polyribonucleotide nucleotidyltransferase	III.3.4	60.5	1	36	36	244	catalytic activity; metal ion binding; RNA binding	cytoplasm	metabolic process	757	80.3307	4.94482
A5CRB9	CMM_1576	2-isopropylmalate synthase	I.2.5	63.95	1	32	32	278	catalytic activity		metabolic process	588	64.8598	4.85596
A5CNW7	CMM_0728	Phosphoribosylformylglycinamidine synthase subunit PurL	I.3.1	56.23	1	29	29	139	nucleotide binding; metal ion binding; catalytic activity	cytoplasm	metabolic process	786	83.8139	4.76709
A5CR16	CMM_1473	Phosphoenolpyruvate carboxykinase [GTP]	I.1.3	47.52	1	26	26	78	nucleotide binding; catalytic activity; metal ion binding	cytoplasm	metabolic process	646	70.1482	5.30029
A5CQA6	CMM_1215	Uncharacterized protein	V.2.1	34.98	1	27	27	154				1152	117.016	6.40479
A5CPY3	CMM_1093	Dihydroxy-acid dehydratase	I.2.5	64.36	1	27	27	195	catalytic activity; metal ion binding		metabolic process	564	59.248	5.12256
A5CLK3	pCM1_0020	Endoglucanase	IV.6.3	54.16	1	23	23	283	catalytic activity		metabolic process	746	77.9751	7.10791
A5CR15	CMM_1472	Valine--tRNA ligase	III.3.2	54.37	1	35	35	176	nucleotide binding; catalytic activity	cytoplasm	metabolic process; regulation of biological process	881	96.5227	5.05908
A5CSJ1	CMM_2002	Phenylalanine--tRNA ligase beta subunit	III.3.2	50.53	1	30	30	128	RNA binding; nucleotide binding; metal ion binding; catalytic activity	cytoplasm	metabolic process	847	88.2554	5.12256
A5CT24	CMM_2179	GTP-binding protein typA/bipA homolog	III.3.5	51.65	1	28	28	194	nucleotide binding; catalytic activity		metabolic process	635	69.5749	5.26221
A5CUB6	CMM_2620	Elongation factor Tu	III.3.3	74.31	1	26	26	452	nucleotide binding; RNA binding; catalytic activity	cytoplasm	metabolic process	397	43.3462	5.23682
A5CRT0	CMM_1737	Glucose-6-phosphate 1-dehydrogenase	I.1.2	57.31	1	23	23	161	catalytic activity; nucleotide binding		metabolic process	513	57.8676	5.30029
A5CP79	CMM_0840	NPL/P60 family secreted protein	IV.6.3	61.27	1	23	23	719				457	45.5947	5.04639
A5CRI5	CMM_1642	Dihydrolipoyl dehydrogenase	I.1.3	62.14	1	21	21	224	catalytic activity; nucleotide binding	cytoplasm	metabolic process; cellular homeostasis; regulation of biological process	457	48.0602	5.51611
A5CM05	CMM_0070	Subtilisin-like serine protease, peptidase family S8A	IV.6.1	52.37	1	32	32	126	catalytic activity; protein binding		metabolic process; regulation of biological process	1033	103.796	5.74463
A5CQ58	CMM_1167	ATP synthase subunit alpha	IV.1.18	56.33	1	28	28	177	nucleotide binding; catalytic activity; transporter activity	membrane	metabolic process; transport	545	58.9806	5.12256
A5CTZ9	CMM_2503	Polyphosphate kinase	I.1.7	37.14	1	25	26	105	nucleotide binding; catalytic activity		metabolic process	727	81.5797	5.43994
A5CS23	CMM_1831	Glycerol kinase	IV.1.20	58.61	1	20	20	231	nucleotide binding; catalytic activity		metabolic process	505	55.4509	4.77979
A5CRU6	CMM_1753	Uncharacterized protein	V.2.1	59.21	1	23	23	122				559	62.1619	4.95752
A5CPN1	CMM_0991	Acetyl/propionyl CoA carboxylase subunit	I.4.1	45.67	1	22	22	137	catalytic activity; nucleotide binding; metal ion binding		metabolic process	589	62.2641	5.24951
A5CRT6	CMM_1743	Phosphoglycerate kinase	I.1.1	65.1	1	22	22	129	nucleotide binding; catalytic activity	cytoplasm	metabolic process	404	42.0789	4.85596
A5CQT8	CMM_1397	1,4-alpha-glucan branching enzyme GlgB	I.1.8	47.96	1	24	24	121	catalytic activity		metabolic process	859	94.119	4.80518
A5CPG1	CMM_0922	Acetyl-coenzyme A synthetase	I.4.3	51.55	1	24	24	94	nucleotide binding; catalytic activity; metal ion binding		metabolic process	679	73.531	5.08447
A5CNX4	CMM_0735	Putative oxidoreductase	V.1.3	82.67	1	23	23	137				329	35.1709	5.08447
A5CPA5	CMM_0866	Putative alpha-glucoside ABC transporter,substrate-binding protein	IV.1.5	53.3	1	22	22	446	transporter activity		transport	454	48.1192	4.37354
A5CRE2	CMM_1600	GDP-mannose 4,6-dehydratase	II.2.10	87.43	1	22	22	461	catalytic activity; nucleotide binding		metabolic process	350	39.0124	5.36377
A5CN16	CMM_0430	Hypothetical secreted protein, putative cell-surface protein	II.2.5	58.22	1	21	21	136				608	62.2059	8.54346
A5CPH1	CMM_0931	D-alanyl-D-alanine carboxypeptidase	II.2.1	57.96	1	21	21	178	catalytic activity		metabolic process	452	45.8716	5.33838
A5CU80	CMM_2584	DNA-directed RNA polymerase subunit alpha	III.2.1	70.39	1	21	21	215	DNA binding; catalytic activity; protein binding		metabolic process	331	36.0226	4.75439
A5CQ17	CMM_1126	Putative 5'-nucleotidase	II.2.5	62.52	1	20	20	140	catalytic activity		metabolic process	715	73.1799	4.55127
A5CMS5	CMM_0338	Uncharacterized protein	V.2.1	68.12	1	20	20	706			metabolic process	414	43.9745	5.60498
A5CM25	CMM_0090	Beta-xylanase	IV.6.3	45.12	1	19	19	48	catalytic activity		metabolic process	543	58.1394	5.18604
A5CSD4	CMM_1942	Uncharacterized protein	IV.6.1	79.88	1	19	19	455	catalytic activity		metabolic process	333	34.3794	6.16357
A5CUH3	CMM_2676	Beta-lactamase	IV.5.6	66.15	1	18	18	114	catalytic activity		metabolic process; response to stimulus	322	32.4915	4.60205
A5CQ47	CMM_1156	Transcription termination factor Rho	III.2.1	47.87	1	29	29	137	nucleotide binding; RNA binding; catalytic activity		metabolic process; regulation of biological process	823	87.5154	5.30029
A5CTC0	CMM_2275	Bifunctional protein GlmU	II.2.1	70.82	1	26	26	105	metal ion binding; catalytic activity	cytoplasm	cell organization and biogenesis; metabolic process; regulation of biological process	514	54.0453	5.5542
A5CQT9	CMM_1398	Alpha-1,4-glucan:maltose-1-phosphate maltosyltransferase	I.1.8	57.16	1	24	24	92	catalytic activity		metabolic process	712	78.5745	5.13525
A5CS13	CMM_1821	Threonine--tRNA ligase	III.3.2	45.76	1	24	24	100	nucleotide binding; catalytic activity; metal ion binding	cytoplasm	metabolic process	684	76.7086	5.18604
A5CNA0	CMM_0513	PgmA protein	I.1.9	69.96	1	24	24	142	metal ion binding; catalytic activity		metabolic process	546	58.1654	5.021
A5CPM8	CMM_0988	Putative phosphomannomutase	I.1.10	47.8	1	23	23	111	metal ion binding; catalytic activity		metabolic process	567	60.5971	4.97021
A5CNE9	CMM_0561	Aspartyl-tRNA synthetase	III.3.2	67.43	1	23	23	104	nucleotide binding; catalytic activity	cytoplasm	metabolic process	436	48.7938	5.09717
A5CSZ7	CMM_2152	Proline--tRNA ligase	III.3.2	59.32	1	22	23	120	nucleotide binding; catalytic activity	cytoplasm	metabolic process; regulation of biological process	590	63.7469	5.10986
A5CRX0	CMM_1777	S-adenosylmethionine synthase	I.5.11	72.95	1	22	22	133	nucleotide binding; metal ion binding; catalytic activity	cytoplasm	metabolic process	403	43.2031	5.21143
A5CU50	CMM_2554	GMP synthase [glutamine-hydrolyzing]	I.3.1	61.6	1	21	21	131	nucleotide binding; catalytic activity	cytoplasm	metabolic process	526	56.1609	4.99561
A5CRS8	CMM_1735	Transaldolase	I.1.2	63.34	1	21	21	213	catalytic activity	cytoplasm	metabolic process	371	39.8675	4.70361
A5CPN9	CMM_0999	Putative acetyl/propionyl-CoA carboxylase beta chain	I.4.1	53.26	1	20	20	108	catalytic activity		metabolic process	537	57.7138	5.42725
A5CTU2	CMM_2446	UTP--glucose-1-phosphate uridylyltransferase	I.1.9	76.51	1	20	20	163	catalytic activity		metabolic process	298	32.755	5.37646
A5CRH9	CMM_1636	Glutamine synthetase	I.2.2	53.38	1	20	20	206	nucleotide binding; catalytic activity	cytoplasm	metabolic process	474	52.9945	5.07178
A5CRF9	CMM_1616	3-oxoacyl-[acyl-carrier-protein] synthase 2	I.4.1	91.04	1	20	20	205	catalytic activity		metabolic process	413	42.9919	5.21143
A5CPZ0	CMM_1100	D-3-phosphoglycerate dehydrogenase	I.2.4	52.17	1	19	19	135	catalytic activity; nucleotide binding		metabolic process	529	55.4756	4.95752
A5CRT7	CMM_1744	Glyceraldehyde-3-phosphate dehydrogenase	I.1.1	74.93	1	18	18	408	catalytic activity; nucleotide binding		metabolic process	335	35.6876	5.24951
A5CU62	CMM_2566	Putative branched-chain amino acid ABC transporter, substrate-binding protein	IV.1.4	48.71	1	17	17	196			transport	427	44.0538	4.39893
A5CST1	CMM_2088	Putative oxidoreductase	V.1.3	73.45	1	17	17	219	metal ion binding; catalytic activity		metabolic process	339	35.6389	4.99561
A5CPU4	CMM_1054	Protein translocase subunit SecA	IV.2.1	37.09	1	26	26	108	nucleotide binding; catalytic activity	cytoplasm; membrane	transport	941	104.502	5.36377
A5CSZ4	CMM_2149	Translation initiation factor IF-2	III.3.3	38.98	1	26	26	133	nucleotide binding; RNA binding; catalytic activity	cytoplasm	metabolic process; regulation of biological process; response to stimulus	944	98.2468	5.8208
A5CRS4	CMM_1731	Uncharacterized protein	IV.5.5	61.44	1	22	22	113			cell organization and biogenesis; metabolic process	472	52.4841	5.18604
A5CQS5	CMM_1383	30S ribosomal protein S2	III.3.1	73.97	1	21	21	124	structural molecule activity	ribosome	metabolic process	315	34.9981	5.16064
A5CPY6	CMM_1096	Ketol-acid reductoisomerase	I.2.5	65.98	1	21	21	196	catalytic activity		metabolic process	341	37.1478	5.021
A5CR89	CMM_1547	Leucine--tRNA ligase	III.3.2	28.2	1	20	20	79	nucleotide binding; catalytic activity	cytoplasm	metabolic process; regulation of biological process	851	94.8912	5.21143
A5CU18	CMM_2522	Serine hydroxymethyltransferase	I.2.4	70.82	1	20	20	132	catalytic activity	cytoplasm	metabolic process	425	45.1262	5.56689
A5CTS7	CMM_2429	Ribonucleoside-diphosphate reductase	I.3.1	35.37	1	20	20	129	nucleotide binding; catalytic activity		metabolic process	834	92.826	5.65576
A5CRV1	CMM_1758	Pyruvate kinase	I.1.1	53.01	1	19	19	143	metal ion binding; catalytic activity		metabolic process	481	51.2429	5.30029
A5CU44	CMM_2548	Succinyl-CoA ligase [ADP-forming] subunit beta	I.1.3	57.11	1	19	20	140	nucleotide binding; metal ion binding; catalytic activity		metabolic process	387	40.4488	4.58936
A5CRL6	CMM_1673	Beta-xylanase	IV.6.3	63.11	1	19	19	164	catalytic activity		metabolic process	431	46.8357	6.13818
A5CRI4	CMM_1641	Putative pyruvate/2-oxoglutarate dehydrogenase complex dihydrolipoamide acyltransferase (E2) component	I.1.3	47.08	1	18	18	153	catalytic activity		metabolic process	480	49.0363	4.57666
A5CTA8	CMM_2263	Enolase	I.1.1	60.33	1	18	18	224	metal ion binding; catalytic activity	extracellular; cytoplasm; cell surface	metabolic process	426	44.8219	4.70361
A5CR19	CMM_1478	Putative oligopeptide ABC transporter, substrate-binding protein	IV.1.4	59.67	1	17	17	118	transporter activity		transport	548	58.0099	4.60205
A5CS64	CMM_1872	Uncharacterized protein	V.2.1	75.65	1	17	17	485			metabolic process	423	43.012	9.43701
A5CR28	CMM_1487	Putative ribonuclease	III.2.2	47.32	1	31	31	113	RNA binding; catalytic activity		metabolic process	1006	108.526	5.68115
A5CRK3	CMM_1660	1-deoxy-D-xylulose-5-phosphate synthase	I.1.5	45.32	1	23	23	78	metal ion binding; catalytic activity		metabolic process	662	71.4857	5.52881
A5CPL0	CMM_0970	Succinate dehydrogenase flavoprotein subunit	I.1.3	50.25	1	22	22	135	catalytic activity; nucleotide binding	membrane	metabolic process; transport	607	66.3672	5.31299
A5CU40	CMM_2544	Bifunctional purine biosynthesis protein PurH	I.3.1	50.46	1	21	21	200	catalytic activity		metabolic process	541	56.5777	5.2749
A5CQX3	CMM_1432	Glycogen operon protein GlgX homolog	I.1.8	43.46	1	20	21	83	catalytic activity		metabolic process	734	82.1649	4.93213
A5CU70	CMM_2576	Glutamine--fructose-6-phosphate aminotransferase [isomerizing]	I.1.9	41.56	1	20	20	124	catalytic activity	cytoplasm	metabolic process	616	65.9046	5.16064
A5CSI8	CMM_1995	Argininosuccinate lyase	I.2.3	50.1	1	18	18	70	catalytic activity	cytoplasm	metabolic process	497	52.8631	5.26221
A5CT16	CMM_2171	Citrate synthase	I.1.3	48.07	1	17	17	108	catalytic activity	cytoplasm	metabolic process	441	48.814	5.63037
A5CSE3	CMM_1951	Putative glycine betaine aldehyde dehydrogenase	I.1.5	47.09	1	17	17	123	catalytic activity		metabolic process	499	52.3935	5.07178
A5CS34	CMM_1842	Putative cytochrome c oxidase subunit II	I.1.4	60.4	1	17	17	255	catalytic activity; transporter activity; metal ion binding	membrane	metabolic process; transport	303	33.9704	5.2749
A5CT21	CMM_2176	Conserved secreted lipoprotein	IV.1.16	63.21	1	17	17	145				405	42.3398	4.39893
A5CLY5	CMM_0050	Uncharacterized protein	IV.6.1	85.89	2	17	17	449	catalytic activity		metabolic process	333	34.2514	4.85596
A5CMS3	CMM_0337	Uncharacterized protein	V.2.1	48.99	1	16	16	130	catalytic activity		metabolic process	447	46.1333	4.39893
A5CTZ0	CMM_2495	2,3-bisphosphoglycerate-dependent phosphoglycerate mutase	I.1.1	86.85	1	16	16	88	catalytic activity		metabolic process	251	27.6991	5.04639
A5CRS9	CMM_1736	Glucose-6-phosphate isomerase	I.1.1	61.21	1	16	16	113	catalytic activity	cytoplasm	metabolic process	531	54.8186	4.61475
A5CTT4	CMM_2438	Putative L-arabinose ABC transporter, substrate binding protein	IV.1.5	44.99	1	15	15	70				449	47.7558	4.86865
A5CNM7	CMM_0638	Putative membrane metalloendopeptidase,subfamily M23B	IV.7.1	54.89	1	15	15	161				419	42.8454	5.87158
A5CQ41	CMM_1150	Arginine--tRNA ligase	III.3.2	61.55	1	25	25	94	nucleotide binding; catalytic activity	cytoplasm	metabolic process	554	60.3385	5.08447
A5CQZ2	CMM_1451	Putative ABC transporter, ATP-binding protein	IV.1.1	54.29	1	22	22	103	nucleotide binding; catalytic activity		metabolic process	560	61.8858	5.08447
A5CQ95	CMM_1204	UPF0182 protein CMM_1204	V.2.1	38.45	1	21	21	97		membrane		983	106.504	4.80518
A5CMW9	CMM_0383	Phosphoenolpyruvate carboxylase	I.1.5	31.76	1	21	21	81	metal ion binding; catalytic activity		metabolic process	910	99.0406	5.63037
A5CRZ1	CMM_1798	Chorismate synthase	I.2.7	63.11	1	21	21	101	catalytic activity		metabolic process	412	42.9431	5.43994
A5CUW6	CMM_2819	Putative metallopeptidase, family M13	IV.7.1	46.21	1	21	21	87	catalytic activity		metabolic process	660	73.3918	4.67822
A5CPB7	CMM_0878	L-arabinose isomerase	I.1.2	53.27	1	20	20	103	catalytic activity; metal ion binding	cytoplasm	metabolic process	505	55.4091	5.10986
A5CR95	CMM_1553	Uncharacterized protein	V.2.1	59.9	1	19	19	94	catalytic activity		metabolic process	419	43.9958	5.69385
A5CQL4	CMM_1323	GuaB3 protein	I.3.1	68.48	1	19	19	109	catalytic activity; nucleotide binding		metabolic process	479	49.5886	5.5542
A5CT01	CMM_2156	4-hydroxy-3-methylbut-2-en-1-yl diphosphate synthase (flavodoxin)	I.4.2	67.72	1	18	19	66	catalytic activity; metal ion binding		metabolic process	381	40.4615	7.00537
A5CPS4	CMM_1034	Putative phosphohexomutase	I.1.1	44.42	1	18	18	117	catalytic activity		metabolic process	475	49.9812	4.69092
A5CRC9	CMM_1587	Putative oligopeptide ABC transporter, substrate-binding protein	IV.1.4	41.92	1	18	18	150	transporter activity		transport	551	58.0107	4.43701
A5CRI6	CMM_1643	Probable cytosol aminopeptidase	I.2.10	59.16	1	17	17	94	catalytic activity; metal ion binding	cytoplasm	metabolic process	502	51.4596	5.0083
A5CRN9	CMM_1696	Putative metallopeptidase, peptidase family M20A	IV.7.1	52.06	1	16	16	88	catalytic activity		metabolic process	436	46.8619	4.81787
A5CM67	CMM_0132	Uncharacterized protein	V.2.1	54.69	1	16	16	84				426	44.5229	6.32861
A5CSJ8	CMM_2006	Putative glutamate ABC transporter, substrate-binding protein	IV.1.4	62.87	1	16	16	293	transporter activity		transport	307	32.1329	4.4624
A5CPB8	CMM_0879	Putative sugar ABC transporter, substrate-binding protein	IV.1.5	49.47	1	16	16	429				376	39.4368	4.69092
A5CT22	CMM_2177	Uncharacterized protein	IV.1.16	48.98	1	15	15	65	antioxidant activity; catalytic activity; metal ion binding		transport; cellular homeostasis; metabolic process	443	46.148	5.8335
A5CLR5	pCM2_0052	PhpB protein	IV.6.1	77.82	1	15	15	92	catalytic activity		metabolic process	284	29.5851	8.57275
A5CLK6	pCM1_0023	Putative extracellular serine protease	IV.6.1	75.08	1	14	14	597	catalytic activity		metabolic process	313	33.0572	6.3667
A5CRL7	CMM_1674	Beta-xylanase	IV.6.3	64.57	1	26	26	130	catalytic activity		metabolic process	669	71.2628	4.97021
A5CQB6	CMM_1225	ATP-dependent RNA helicase DeaD	III.1.9	54.1	1	25	25	107	nucleotide binding; RNA binding; catalytic activity	cytoplasm	cell organization and biogenesis; metabolic process; response to stimulus	586	64.1044	7.09326
A5CMQ2	CMM_0316	ATPase with chaperone activity, ATP-binding subunit	IV.4.1	41.64	1	24	25	100	nucleotide binding; catalytic activity		metabolic process	730	80.5413	5.19873
A5CRE1	CMM_1599	GDP-L-fucose synthase	II.2.10	70.36	1	21	21	100	catalytic activity; nucleotide binding		metabolic process	334	36.1004	5.33838
A5CSJ0	CMM_1996	Argininosuccinate synthase	I.2.3	59.47	1	19	19	133	nucleotide binding; catalytic activity	cytoplasm	metabolic process	412	44.798	4.93213
A5CRV7	CMM_1764	Indole-3-glycerol phosphate synthase	I.2.7	80.23	1	18	18	94	catalytic activity		metabolic process	258	27.1615	4.91943
A5CQN4	CMM_1343	UDP-N-acetylglucosamine 1-carboxyvinyltransferase	II.2.1	56.33	1	18	18	105	catalytic activity	cytoplasm	regulation of biological process; metabolic process; cell division; cell organization and biogenesis	442	47.3988	5.50342
A5CR04	CMM_1463	Trigger factor	IV.4.4	47.93	1	18	18	133	catalytic activity	cytoplasm	metabolic process; transport; cell division	484	52.5968	4.51318
A5CPR0	CMM_1020	GlfA protein	II.2.9	66.93	1	18	18	100	catalytic activity; nucleotide binding		metabolic process	387	44.1749	5.03369
A5CTG2	CMM_2316	Uncharacterized protein	V.2.1	84.44	1	17	17	119	catalytic activity		metabolic process	257	26.7779	4.7417
A5CQU9	CMM_1408	Glutamyl-tRNA(Gln) amidotransferase subunit A	III.3.2	50.29	1	16	16	82	nucleotide binding; catalytic activity		metabolic process	515	53.6904	5.07178
A5CNA2	CMM_0515	Serine--tRNA ligase	III.3.2	53.76	1	16	16	90	nucleotide binding; catalytic activity	cytoplasm	metabolic process	426	46.4877	5.23682
A5CUB0	CMM_2614	50S ribosomal protein L2	III.3.1	52.33	1	16	16	101	RNA binding; structural molecule activity; catalytic activity	ribosome	metabolic process	279	30.5114	11.2827
A5CLX3	CMM_0039	Putative extracellular serine protease, family S1A	IV.6.1	76.53	1	15	15	121	catalytic activity		metabolic process	277	29.2315	7.79639
A5CV45	CMM_2898	Alanine dehydrogenase	I.2.2	67.65	1	15	15	131	catalytic activity		metabolic process	371	38.6651	5.61768
A5CR56	CMM_1514	Uncharacterized protein	V.2.1	89.89	1	15	15	159				188	20.022	4.91943
A5CPU1	CMM_1051	Uncharacterized protein	IV.3.2	41.22	1	14	14	58				575	59.6523	4.85596
A5CLM9	pCM2_0016	Uncharacterized protein	IV.2.5	71.35	1	14	14	106				349	35.815	5.19873
A5CQX1	CMM_1430	Malto-oligosyltrehalose trehalohydrolase	I.1.5	35.67	1	14	14	81	catalytic activity	cytoplasm	metabolic process	600	65.8127	4.77979
A5CNE8	CMM_0560	Putative transcriptional regulator	IV.3.1	47.93	1	14	14	246				411	42.4697	5.2876
A5CT78	CMM_2233	Fumarate hydratase class II	I.1.3	45.36	1	14	14	116	catalytic activity	cytoplasm	metabolic process	474	49.5986	5.19873
A5CPE2	CMM_0903	Aspartate-semialdehyde dehydrogenase	I.2.5	50.68	1	14	15	102	catalytic activity; protein binding; nucleotide binding	cytoplasm	metabolic process	365	37.6537	5.03369
A5CLU9	CMM_0017	Penicillin-binding protein	II.2.1	39.75	1	13	13	67				483	50.1783	4.84326
A5CT06	CMM_2161	Peptidyl-prolyl cis-trans isomerase	IV.4.4	71.76	1	13	13	215	catalytic activity		metabolic process	340	33.7472	4.53857
A5CRL8	CMM_1675	Uncharacterized protein	V.2.2	56.96	1	13	13	1218				158	16.6151	9.45166
A5CMQ3	CMM_0317	AgaA protein	I.1.8	51.86	1	25	25	93	catalytic activity		metabolic process	727	78.522	5.33838
A5CPG7	CMM_0927	DNA topoisomerase 1	III.1.1	32.62	1	22	23	88	nucleotide binding; metal ion binding; DNA binding; catalytic activity	chromosome	metabolic process	984	106.018	8.17725
A5CPZ8	CMM_1108	Glutamate--tRNA ligase	III.3.2	47.43	1	19	19	90	RNA binding; nucleotide binding; catalytic activity	cytoplasm	metabolic process	506	55.9015	5.18604
A5CRQ7	CMM_1714	Putative trehalose synthase	I.1.8	43.28	1	18	18	72	catalytic activity		metabolic process	573	65.7273	4.95752
A5CTL6	CMM_2370	Methionine--tRNA ligase	III.3.2	39.05	1	18	18	69	nucleotide binding; catalytic activity; metal ion binding	cytoplasm	metabolic process	525	58.8677	5.18604
A5CTM6	CMM_2380	Putative 2-methylcitrate dehydratase	I.1.5	54.07	1	17	17	70	catalytic activity		metabolic process	516	54.9052	5.97314
A5CNI3	CMM_0595	Ferrochelatase	I.5.7	58.65	1	17	17	81	catalytic activity; metal ion binding	cytoplasm	metabolic process	416	45.2836	4.88135
A5CV98	CMM_2950	Putative adenylosuccinate lyase	I.3.1	43.48	1	16	16	59	catalytic activity		metabolic process	460	50.4674	5.60498
A5CPN0	CMM_0990	Dihydrolipoamide dehydrogenase	I.1.3	54.37	1	16	16	92	catalytic activity; nucleotide binding	cytoplasm	metabolic process; cellular homeostasis; regulation of biological process	480	50.2009	5.65576
A5CTB7	CMM_2272	6-phosphogluconate dehydrogenase, decarboxylating	I.1.2	44.42	1	16	16	84	catalytic activity; nucleotide binding		metabolic process	484	51.544	4.84326
A5CV63	CMM_2915	Putative Zn-dependant dehydrogenase	V.1.3	53.45	1	16	16	115	metal ion binding; catalytic activity		metabolic process	391	42.0551	4.95752
A5CS48	CMM_1856	Cell division protein FtsZ	II.1.1	58.84	1	15	15	124	nucleotide binding; catalytic activity	cytoplasm	cell organization and biogenesis; metabolic process; reproduction; cell division	379	38.5009	4.51318
A5CPH3	CMM_0933	Putative succinate-semialdehyde dehydrogenase	I.1.5	40.73	1	14	14	80	catalytic activity		metabolic process	491	51.8548	4.97021
A5CRX8	CMM_1785	Dihydroorotase	I.3.2	50.85	1	14	14	75	catalytic activity; metal ion binding		metabolic process	470	49.1059	5.07178
A5CPL6	CMM_0976	Putative ABC transporter, substrate-binding protein	IV.1.5	55.77	1	14	14	215		membrane		364	37.0774	4.33545
A5CQT6	CMM_1395	Conserved membrane protein	V.2.1	38.29	1	13	13	78				619	63.4199	5.07178
A5CLX8	CMM_0044	Uncharacterized protein	IV.6.1	59.94	1	13	13	158	catalytic activity		metabolic process	337	35.0516	8.63135
A5CLT4	CMM_0002	DNA polymerase III subunit beta	III.1.2	32.38	1	12	12	56	DNA binding; catalytic activity	cytoplasm	metabolic process	383	41.4347	4.93213
A5CPM3	CMM_0983	AddA protein	I.3.1	39.52	1	12	12	75	catalytic activity		metabolic process	372	40.0782	4.56396
A5CLR7	pCM2_0054	Pat-1 protein	IV.6.1	61.07	1	9	14	129	catalytic activity		metabolic process	280	29.638	8.07471
A5CLT9	CMM_0007	DNA gyrase subunit A	III.1.1	38.21	1	25	25	104	nucleotide binding; DNA binding; catalytic activity	chromosome; cytoplasm	metabolic process	895	98.0975	5.19873
A5CRU8	CMM_1755	DNA polymerase	III.1.2	44.07	1	24	24	72	DNA binding; catalytic activity		metabolic process	894	98.829	5.21143
A5CSV9	CMM_2114	Putative protease II (Oligopeptidase B)	IV.7.4	46.46	1	23	23	108	catalytic activity		metabolic process	721	79.9078	4.80518
A5CT08	CMM_2163	Putative 4-aminobutyrate aminotransferase	I.2.1	64.54	1	18	18	103	catalytic activity		metabolic process	471	49.2424	5.80811
A5CPL4	CMM_0974	ManC protein	I.1.10	70.51	1	18	18	92	catalytic activity		metabolic process	373	39.68	5.75732
A5CVB3	CMM_2964	Putative RNA nucleotidyltransferase	III.3.4	43.7	1	17	17	50	nucleotide binding; catalytic activity; RNA binding; metal ion binding		metabolic process	476	52.8607	5.8208
A5CSM6	CMM_2034	Putative hydrolase, metallo-beta-lactamase superfamily	IV.5.6	45.7	1	17	17	81	RNA binding; catalytic activity; metal ion binding	cytoplasm	metabolic process	558	60.7008	6.15088
A5CPR7	CMM_1027	Putative mannose-6-phosphate isomerase	II.2.9	62.79	1	16	16	73	catalytic activity; metal ion binding		metabolic process	430	45.8016	5.0083
A5CRT5	CMM_1742	Triosephosphate isomerase	I.1.1	81.89	1	16	16	92	catalytic activity	cytoplasm	metabolic process	265	27.8074	5.45264
A5CRS3	CMM_1730	Uncharacterized protein	IV.5.5	55.28	1	15	15	77			cell organization and biogenesis; metabolic process	407	43.1799	5.0083
A5CRR2	CMM_1719	Glucose-1-phosphate adenylyltransferase	I.1.10	50.61	1	15	15	64	nucleotide binding; catalytic activity		metabolic process	413	44.9919	5.32568
A5CNX3	CMM_0734	Putative amidohydrolase	V.1.6	70.25	1	15	15	87	catalytic activity		metabolic process	279	28.843	5.07178
A5CPE9	CMM_0910	Uncharacterized protein	V.2.1	36.8	1	14	14	45				606	63.6319	4.93213
A5CNS8	CMM_0689	Adenylosuccinate synthetase	I.3.1	46.85	1	14	14	59	nucleotide binding; metal ion binding; catalytic activity	cytoplasm	metabolic process	429	46.4881	6.04932
A5CRR1	CMM_1718	Putative glycosyl transferase	II.2.4	43.4	1	13	13	65	catalytic activity		metabolic process	394	42.2757	5.31299
A5CPP3	CMM_1003	N5-carboxyaminoimidazole ribonucleotide synthase	I.3.1	46.93	1	13	13	60	nucleotide binding; catalytic activity; metal ion binding		metabolic process	375	39.8156	5.40186
A5CU55	CMM_2559	Putative inosine-5'-monophosphate dehydrogenase	I.3.1	51.34	1	13	13	71	catalytic activity		metabolic process	372	39.3444	6.53662
A5CP97	CMM_0858	Putative UDP-glucose 4-epimerase	I.1.1	50.85	1	13	13	93	catalytic activity		metabolic process	295	32.4041	4.95752
A5CTW4	CMM_2469	Phosphoserine transaminase	I.2.4	54.84	1	13	13	95	catalytic activity	cytoplasm	metabolic process	372	40.0584	5.09717
A5CQG9	CMM_1278	Putative serine protease	IV.7.3	47.36	1	13	13	92	catalytic activity; protein binding		metabolic process	511	49.3658	4.67822
A5CNQ1	CMM_0662	NADP-dependent alcohol dehydrogenase	V.1.3	63.51	1	13	13	133	catalytic activity; metal ion binding		metabolic process	348	37.1806	4.95752
A5CM79	CMM_0144	Uncharacterized protein	V.2.1	69.72	1	12	12	124				327	33.5495	4.61475
A5CRL3	CMM_1670	Probable oxidoreductase	V.1.3	65.23	1	12	13	117	catalytic activity		metabolic process	279	30.5656	4.83057
A5CQU6	CMM_1405	Conserved secreted protein	V.2.1	35.22	1	11	11	68				460	47.4347	5.26221
A5CR99	CMM_1557	Putative secreted protein	V.2.2	63.32	1	11	11	331				259	27.4746	4.90674
A5CU43	CMM_2547	Succinyl-CoA ligase [ADP-forming] subunit alpha	I.1.3	49.15	1	11	11	294	nucleotide binding; catalytic activity		metabolic process	295	29.8816	5.33838
A5CS72	CMM_1880	Pyruvate carboxylase	I.1.3	27.8	1	23	23	77	nucleotide binding; catalytic activity; metal ion binding		metabolic process; transport	1133	121.447	5.24951
A5CS69	CMM_1877	Putative long-chain-fatty-acid-CoA ligase	I.4.1	54.93	1	21	21	67	catalytic activity		metabolic process	608	65.4899	5.8208
A5CR23	CMM_1482	Isoleucine--tRNA ligase	III.3.2	23.82	1	19	19	59	nucleotide binding; catalytic activity; metal ion binding	cytoplasm	metabolic process; regulation of biological process	1100	122.63	4.93213
A5CQ83	CMM_1192	Putative ATP-dependent RNA helicase	III.1.9	45.97	1	16	16	62	nucleotide binding; catalytic activity		metabolic process	509	54.8463	8.73389
A5CPS8	CMM_1038	Adenosylhomocysteinase	I.5.11	41.5	1	16	16	52	catalytic activity	cytoplasm	metabolic process	494	53.7334	5.021
A5CPY4	CMM_1038	Acetolactate synthase	I.5.11	44.18	1	16	16	80	metal ion binding; catalytic activity; nucleotide binding		metabolic process	627	66.8119	5.21143
A5CTA4	CMM_2259	Putative NADH dehydrogenase	I.1.4	45.45	1	16	16	69	catalytic activity; nucleotide binding		metabolic process	495	52.8491	5.96045
A5CPT5	CMM_1045	Putative regulatory protein	IV.3.6	52.68	1	15	15	56	nucleotide binding; DNA binding; protein binding; catalytic activity		metabolic process; regulation of biological process	317	34.3202	5.43994
A5CSH5	CMM_1983	CTP synthase	I.3.2	39.83	1	15	15	72	nucleotide binding; catalytic activity		metabolic process	580	62.4305	4.98291
A5CTL7	CMM_2371	Putative citrate synthase	I.1.3	60.31	1	15	15	54	catalytic activity	cytoplasm	metabolic process	383	41.6133	5.35107
A5CPP5	CMM_1005	Putative transcriptional regulator	IV.3.1	36.53	1	15	15	59				449	48.9426	7.92822
A5CQS1	CMM_1384	Elongation factor Ts	III.3.3	68.73	1	15	15	88	RNA binding; protein binding	cytoplasm	metabolic process	275	29.2693	5.18604
A5CLU7	CMM_0015	PknB protein	IV.3.7	48.63	1	15	15	83	nucleotide binding; catalytic activity; enzyme regulator activity	membrane	metabolic process	582	61.1533	5.0083
A5CV20	CMM_2873	Putative aminotransferase	I.2.1	53.38	1	14	14	73	catalytic activity		metabolic process	444	47.7262	5.18604
A5CSC5	CMM_1933	Putative arylesterase	V.1.6	64.39	1	14	14	81	catalytic activity; antioxidant activity		metabolic process	278	30.043	5.14795
A5CTB9	CMM_2274	Ribose-phosphate pyrophosphokinase	I.3.1	44	1	13	13	52	nucleotide binding; metal ion binding; catalytic activity	cytoplasm	metabolic process	325	35.4506	6.29053
A5CTV6	CMM_2461	Uncharacterized protein	III.3.4	51.54	1	13	13	85	RNA binding			260	28.7375	5.13525
A5CPB9	CMM_0880	Putative sugar ABC transporter, ATPase component	IV.1.5	31.43	1	13	13	56	nucleotide binding; catalytic activity		metabolic process	509	54.988	6.0874
A5CPC2	CMM_0883	Beta-glucosidase	I.1.8	28.6	1	13	13	51	catalytic activity		metabolic process	500	54.479	4.95752
A5CS65	CMM_1873	Putative eukaryotic-type serine/threonine protein kinase	IV.3.7	26.04	1	13	13	66	catalytic activity; nucleotide binding; enzyme regulator activity	membrane	metabolic process	649	68.4772	5.12256
A5CPK8	CMM_0968	Phosphoenolpyruvate-protein phosphotransferase	IV.1.20	42.29	1	13	14	60	catalytic activity; transporter activity; metal ion binding	cytoplasm	transport; metabolic process	551	56.5485	4.67822
A5CPN5	CMM_0995	Putative two component system, response regulator	IV.3.2	62.39	1	12	12	43	signal transducer activity; DNA binding		regulation of biological process; response to stimulus	234	24.5309	5.24951
A5CRT1	CMM_1738	Putative Glucose-6-phosphate dehydrogenase assembly protein OpcA	I.1.1	47.29	1	12	12	55				332	35.4025	5.97314
A5CNH5	CMM_0587	Uroporphyrinogen decarboxylase	I.5.7	50.4	1	12	12	63	catalytic activity	cytoplasm	metabolic process	375	39.5257	6.02393
A5CU82	CMM_2586	30S ribosomal protein S13	III.3.1	56.45	1	12	12	53	RNA binding; structural molecule activity	ribosome	metabolic process	124	14.0057	10.3013
A5CSV5	CMM_2110	Putative sugar alcohol dehydrogenase	V.1.3	39.25	1	12	12	57	catalytic activity; nucleotide binding	membrane	metabolic process	428	46.3126	4.85596
A5CPC1	CMM_0882	Xylose isomerase	I.1.2	39.8	1	12	12	70	metal ion binding; catalytic activity	cytoplasm	metabolic process	397	43.8099	4.89404
A5CUC4	CMM_2628	Putative polar amino acid ABC transporter,substrate-binding protein	IV.1.4	68.09	1	12	12	60	receptor activity; signal transducer activity; transporter activity	membrane	transport	282	29.0696	4.50049
A5CRH7	CMM_1634	Putative glutamine synthetase II	I.2.2	48.54	1	12	12	86	catalytic activity		metabolic process	445	49.5428	5.19873
A5CS11	CMM_1819	Pyridoxal 5'-phosphate synthase subunit PdxS	I.5.2	45.33	1	12	12	133	catalytic activity; nucleotide binding		metabolic process	300	31.5452	5.12256
A5CUG0	CMM_2664	Uncharacterized protein	V.2.1	63.79	1	11	11	70				243	27.5117	5.88428
A5CPS1	CMM_1031	Putative secreted protein	V.2.1	67.94	1	11	11	55				499	47.8376	4.51318
A5CTT0	CMM_2434	Putative secreted serine protease, family S1C	IV.7.3	53.55	1	11	11	112	catalytic activity; protein binding		metabolic process	394	37.56	4.52588
A5CPK1	CMM_0961	Riboflavin biosynthesis protein RibBA	I.5.3	39.41	1	11	11	55	nucleotide binding; catalytic activity; metal ion binding		metabolic process	444	47.5662	4.90674
A5CUT5	CMM_2788	Transcription termination/antitermination protein NusG	III.2.1	32.35	1	11	11	81			metabolic process; regulation of biological process	340	37.1801	4.27197
A5CP31	CMM_0792	Putative sugar ABC transporter, solute-binding protein	IV.1.5	54.15	1	11	11	98			metabolic process	325	32.8024	4.53857
A5CUT0	CMM_2783	Putative sugar ABC transporter, substrate binding protein	IV.1.5	38.31	1	11	11	98	transporter activity		transport	449	47.3284	4.44971
A5CU01	CMM_2505	Phosphate-binding protein PstS	IV.1.7	47.12	1	11	11	95			transport	365	36.9774	4.52588
A5CNA4	CMM_0517	Putative transcriptional regulator, LytR family	IV.3.1	44.36	1	11	11	100				381	38.8227	5.14795
A5CPI3	CMM_0944	Putative sugar ABC transporter, substrate-binding protein	IV.1.5	35.07	1	10	10	52	transporter activity		transport	422	44.0054	4.55127
A5CQK5	CMM_1314	Putative iron ABC transporter, substrate-binding protein	IV.1.7	41.39	1	10	10	40	transporter activity		transport	360	38.124	4.55127
A5CQ02	CMM_1112	Putative K+ channel protein, beta subunit	IV.1.10	45.54	1	10	13	70				336	36.8455	4.90674
A5CPZ4	CMM_1104	3-isopropylmalate dehydrogenase	I.2.5	38.87	1	10	10	70	metal ion binding; catalytic activity; nucleotide binding	cytoplasm	metabolic process	355	37.1564	5.32568
A5CNP2	CMM_0653	Cysteine synthase	I.2.8	45.83	1	10	10	88	catalytic activity		metabolic process	312	32.8301	4.84326
A5CPD4	CMM_0895	Phosphate acetyltransferase	I.1.7	35.74	1	17	17	61	catalytic activity	cytoplasm	metabolic process	705	74.3169	4.91943
A5CPE1	CMM_0902	Aspartokinase	I.2.5	56.53	1	15	15	77	catalytic activity		metabolic process	421	43.8418	5.18604
A5CTY3	CMM_2488	Cysteine--tRNA ligase	III.3.2	40.7	1	14	14	50	nucleotide binding; catalytic activity; metal ion binding	cytoplasm	metabolic process	484	52.8855	5.43994
A5CQ80	CMM_1189	Putative Xaa-Pro aminopeptidase	I.2.10	33.33	1	14	14	54	catalytic activity; metal ion binding		metabolic process	540	57.7297	4.84326
A5CSC1	CMM_1929	Putative quinone oxidoreductase	I.1.4	76.02	1	14	14	64	catalytic activity; metal ion binding		metabolic process	342	34.8092	5.18604
A5CUI6	CMM_2692	Putative endoglucanase	IV.6.3	55.22	1	14	14	61	catalytic activity		metabolic process	469	47.5334	9.43701
A5CPQ0	CMM_1010	dTDP-glucose 4,6-dehydratase	II.2.9	65.35	1	14	14	68	catalytic activity		metabolic process	329	36.8455	5.35107
A5CRY9	CMM_1796	3-dehydroquinate synthase	I.2.7	44.83	1	13	13	42	catalytic activity	cytoplasm	metabolic process	377	40.3872	5.78271
A5CTP1	CMM_2395	Putative alpha glycosidase	I.1.8	31.15	1	13	13	62	catalytic activity		metabolic process	748	81.3155	4.71631
A5CTB6	CMM_2271	Putative gluconokinase/dehydrogenase	I.1.2	35.43	1	13	13	62	catalytic activity; nucleotide binding		metabolic process	669	70.1678	5.03369
A5CUF9	CMM_2663	Putative oxidoreductase	V.1.3	46.3	1	13	13	63	catalytic activity		metabolic process	378	40.3388	5.08447
A5CQ45	CMM_1154	Threonine synthase	I.2.5	51.4	1	13	13	71	catalytic activity		metabolic process	358	37.2452	5.51611
A5CSS0	CMM_2077	Putative aspartate ammonia-lyase	I.2.2	42.18	1	13	13	90	catalytic activity		metabolic process	505	53.2185	5.46533
A5CTX0	CMM_2475	Putative two component system response regulator	IV.3.2	60.87	1	13	13	83	signal transducer activity; DNA binding		regulation of biological process; response to stimulus; metabolic process	230	25.5813	5.021
A5CS94	CMM_1902	Uncharacterized protein	V.2.1	35.61	1	12	12	37	catalytic activity		metabolic process	497	50.4339	4.94482
A5CRL0	CMM_1667	Sulfurtransferase	I.2.8	49.5	1	12	12	49	catalytic activity		metabolic process	303	33.6748	4.84326
A5CNZ3	CMM_0754	Phosphoribosylamine--glycine ligase	I.3.1	36.06	1	12	12	55	nucleotide binding; metal ion binding; catalytic activity		metabolic process	416	42.9495	4.79248
A5CNW2	CMM_0723	Putative acyltransferase	II.2.7	24.31	1	12	12	50	catalytic activity	membrane	metabolic process	757	80.5206	6.40479
A5CT09	CMM_2164	Putative asparaginase II	I.2.2	43.15	1	12	12	53				336	34.9162	6.27783
A5CSQ2	CMM_2060	Putative cysteine peptidase, family C56	IV.7.2	84.57	1	12	12	82	catalytic activity		metabolic process	188	20.126	4.42432
A5CLT5	CMM_0003	6-phosphogluconate dehydrogenase	I.1.2	58.31	1	12	12	94	catalytic activity; nucleotide binding		metabolic process	295	31.6219	4.95752
A5CTY0	CMM_2485	Putative sugar ABC transporter, ATP-binding protein	IV.1.5	51.37	1	12	12	171	nucleotide binding; transporter activity; catalytic activity		metabolic process; transport	366	39.2833	5.59229
A5CLY7	CMM_0052	Putative extracellular serine protease, family S1 (Chymotrypsin)	IV.6.1	72.03	1	11	11	67	catalytic activity		metabolic process	286	31.4468	8.20654
A5CPH0	CMM_0930	Uncharacterized protein	IV.7.3	36.57	1	11	11	36	catalytic activity		metabolic process	525	55.2117	4.4624
A5CPB5	CMM_0876	Ribulokinase	I.1.2	37.04	1	11	11	61	nucleotide binding; catalytic activity		metabolic process	567	60.0761	4.90674
A5CSB7	CMM_1925	Putative monooxygenase/oxidoreductase	V.1.3	41.52	1	11	11	44	catalytic activity		metabolic process	342	37.134	5.36377
A5CSE0	CMM_1948	Putative extracellular serine protease	IV.6.1	60.87	1	11	11	75	catalytic activity		metabolic process	322	33.3577	4.65283
A5CQ03	CMM_1113	Putative potassium channel protein subunit	IV.1.10	47.02	1	11	14	77				336	36.8487	4.94482
A5CQN6	CMM_1345	Glycerol-3-phosphate dehydrogenase [NAD(P)+]	I.1.6	50	1	11	11	52	catalytic activity; nucleotide binding	cytoplasm	metabolic process	350	36.646	4.97021
A5CNN2	CMM_0643	Putative oxidoreductase	V.1.3	52.38	1	11	11	68	catalytic activity; nucleotide binding		metabolic process	357	38.0603	4.77979
A5CU99	CMM_2603	50S ribosomal protein L6	III.3.1	74.16	1	11	11	78	RNA binding; structural molecule activity	ribosome	metabolic process	178	19.0033	9.75928
A5CPM9	CMM_0989	Purine nucleoside phosphorylase	I.3.1	63.64	1	11	11	66	catalytic activity		metabolic process	275	28.8439	5.85889
A5CV89	CMM_2941	Putative metal ABC transporter, substrate-binding protein	IV.1.7	56.15	1	11	11	152	metal ion binding		transport	317	32.4311	4.37354
A5CS62	CMM_1870	Putative geranylgeranyl pyrophosphate synthase	I.6.4	35.39	1	10	11	28	catalytic activity		metabolic process	373	40.3331	5.43994
A5CSD9	CMM_1947	Putative extracellular serine protease	IV.6.1	63.03	1	10	10	67	catalytic activity		metabolic process	330	33.592	4.56396
A5CRZ7	CMM_1804	30S ribosomal protein S4	III.3.1	50.72	1	10	10	51	RNA binding; structural molecule activity	ribosome	metabolic process	209	23.639	10.4624
A5CML4	CMM_0278	Putative chorismate mutase	I.2.7	69.9	1	10	10	107			metabolic process	196	20.0346	7.34229
A5CUI5	CMM_2688	Uncharacterized protein	I.1.5	88.5	1	10	10	174	catalytic activity		metabolic process	226	24.0025	4.58936
A5CLW6	CMM_0034	Putative sugar phosphate isomerase/epimerase	I.1.12	61.57	1	10	10	85	catalytic activity		metabolic process	268	28.8005	4.58936
A5CTH4	CMM_2328	Uncharacterized protein	V.2.2	32.4	1	9	9	33				463	47.8275	4.67822
A5CM44	CMM_0109	Putative sugar ABC transporter, binding protein	IV.1.4	28.32	1	9	9	40	transporter activity		transport	452	48.3478	4.43701
A5CRB5	CMM_1573	Putative two-component system, response regulator	IV.3.2	58.77	1	9	9	48	signal transducer activity; DNA binding		regulation of biological process; response to stimulus; metabolic process	228	24.685	6.22705
A5CPW4	CMM_1074	Glucose-6-phosphate 1-dehydrogenase	I.1.2	29.35	1	9	9	47	catalytic activity; nucleotide binding		metabolic process	460	49.5973	4.83057
A5CLL8	pCM2_0007	Uncharacterized protein	V.2.1	78.21	1	9	12	86				257	27.0144	5.41455
A5CMT1	CMM_0345	Conserved exported protein	V.2.1	47.92	1	9	10	95				313	32.3307	5.47803
A5CRZ9	CMM_1807	Uncharacterized protein	V.2.1	52.44	1	21	21	79				410	45.4497	5.68115
A5CRC3	CMM_1581	Glycine--tRNA ligase	III.3.2	48.81	1	18	18	70	nucleotide binding; catalytic activity	cytoplasm	metabolic process	461	52.3843	5.57959
A5CS56	CMM_1864	UDP-N-acetylmuramyl-tripeptide synthetase	II.2.1	45.14	1	17	17	75	nucleotide binding; catalytic activity	cytoplasm	regulation of biological process; metabolic process; cell division; cell organization and biogenesis	514	54.5778	4.91943
A5CPR1	CMM_1021	Putative glycosyltransferase	II.2.9	33.63	1	16	16	46	catalytic activity		metabolic process	672	74.7873	8.52881
A5CTA9	CMM_2264	HisS protein	III.3.2	43.45	1	15	15	50	nucleotide binding; catalytic activity	cytoplasm	metabolic process	435	45.785	5.24951
A5CV18	CMM_2871	PgaA protein	IV.6.3	62.3	1	15	15	43	catalytic activity		metabolic process	496	49.2601	5.5415
A5CP94	CMM_0854	Lysine--tRNA ligase	III.3.2	37.82	1	14	14	53	nucleotide binding; metal ion binding; catalytic activity	cytoplasm	metabolic process	513	55.9424	5.07178
A5CSM9	CMM_2037	Thymidylate synthase ThyX	I.3.2	63.5	1	14	14	51	catalytic activity; nucleotide binding		metabolic process	263	30.0759	5.8335
A5CV01	CMM_2854	Uncharacterized protein	II.1.2	37.98	1	14	14	44				603	63.0935	4.77979
A5CM06	CMM_0071	PpaE protein	IV.6.1	73.58	1	14	14	200	catalytic activity		metabolic process	318	32.5826	8.19189
A5CLU2	CMM_0010	Peptidyl-prolyl cis-trans isomerase	IV.4.4	77.09	1	14	14	208	catalytic activity		metabolic process	179	19.3306	5.71924
A5CQ89	CMM_1198	Putative phosphotransferase	IV.1.20	57.54	1	13	13	60	catalytic activity		metabolic process	358	38.0485	5.12256
A5CT26	CMM_2181	Putative peptide ABC transporter, ATP-binding protein	IV.1.4	38.72	1	13	13	47	nucleotide binding; catalytic activity		metabolic process; transport	563	61.1103	6.16357
A5CRM3	CMM_1680	Short chain dehydrogenase/oxidoreduxtase	V.1.3	49.03	1	13	13	56	catalytic activity		metabolic process	259	27.7222	4.93213
A5CSJ3	CMM_2003	Phenylalanine--tRNA ligase alpha subunit	III.3.2	49.86	1	13	13	45	RNA binding; nucleotide binding; metal ion binding; catalytic activity	cytoplasm	metabolic process	345	37.9638	5.14795
A5CS55	CMM_1863	UDP-N-acetylmuramoyl-tripeptide--D-alanyl-D-alanine ligase	II.2.1	49.68	1	13	13	58	nucleotide binding; catalytic activity	cytoplasm	regulation of biological process; metabolic process; cell division; cell organization and biogenesis	469	49.5731	5.10986
A5CSI9	CMM_2001	N-acetyl-gamma-glutamyl-phosphate reductase	I.2.3	57.31	1	13	13	67	catalytic activity; protein binding; nucleotide binding	cytoplasm	metabolic process	349	36.0096	5.45264
A5CMQ7	CMM_0321	Putative oxidoreductase	V.1.3	63.17	1	13	13	52				334	35.9952	5.64307
A5CS66	CMM_1874	Putative phospho-2-dehydro-3-deoxyheptonate aldolase	I.2.7	41.23	1	13	13	53	catalytic activity		metabolic process	456	49.8131	5.87158
A5CT71	CMM_2226	Putative fructose-bisphosphate aldolase	I.1.1	63.34	1	13	13	70	catalytic activity; metal ion binding		metabolic process	341	36.3201	5.12256
A5CU88	CMM_2592	Phosphoenolpyruvate-protein phosphotransferase	IV.1.20	41.73	1	13	14	66	catalytic activity; transporter activity; metal ion binding	cytoplasm	transport; metabolic process	556	56.9466	4.70361
A5CSU3	CMM_2098	Putative short chain dehydrogenase/oxidoreductase	V.1.3	59.73	1	13	13	122	catalytic activity		metabolic process	298	31.4128	4.62744
A5CQS7	CMM_1386	Ribosome-recycling factor	III.3.4	68.11	1	13	13	139		cytoplasm	metabolic process; cell organization and biogenesis	185	20.5688	5.41455
A5CS71	CMM_1879	Putative oxidoreductase (Similar to E3 component of 2-oxoglutarate dehydrogenase complex)	V.1.3	41.22	1	12	12	41	catalytic activity; nucleotide binding	cytoplasm	cellular homeostasis; regulation of biological process; metabolic process	490	51.5932	4.98291
A5CS15	CMM_1823	Putative glycerol-3-phosphate dehydrogenase	I.1.6	31.4	1	12	12	42	catalytic activity		metabolic process	586	63.5486	5.74463
A5CV93	CMM_2945	Putative phenylalanine aminotransferase	I.2.6	40.16	1	12	12	46	catalytic activity		metabolic process	371	39.3887	5.87158
A5CS36	CMM_1844	Putative metallopeptidase	IV.7.1	50.11	1	12	13	60	catalytic activity		metabolic process	473	49.1929	4.75439
A5CLU8	CMM_0016	PknA protein	IV.3.7	37.48	1	12	12	49	catalytic activity; protein binding; nucleotide binding; enzyme regulator activity		metabolic process	635	64.862	5.21143
A5CUU4	CMM_2797	Putative alpha-glucosidase, glycosyl hydrolase family 13	I.1.8	33.16	1	12	12	43	catalytic activity		metabolic process	579	63.9073	4.66553
A5CSZ6	CMM_2151	Putative transcriptional termination/antitermination factor	III.2.1	50.15	1	12	12	54	RNA binding	cytoplasm	metabolic process; regulation of biological process	335	36.2412	5.40186
A5CRD4	CMM_1592	Putative 2-hydroxyacid dehydrogenase	I.1.5	57.14	1	12	12	49	catalytic activity; nucleotide binding		metabolic process	301	31.8714	4.76709
A5CPR8	CMM_1028	GalE1 protein	II.2.9	60.25	1	12	12	63	catalytic activity		metabolic process	322	34.3282	5.04639
A5CSR7	CMM_2075	Putative hydrolase	V.1.6	53.77	1	12	12	58	catalytic activity		metabolic process	292	31.3048	4.77979
A5CUT7	CMM_2790	Putative aspartate aminotransferase	I.2.1	34.96	1	12	12	61	catalytic activity		metabolic process	409	43.7516	4.97021
A5CQV0	CMM_1409	Aspartyl/glutamyl-tRNA(Asn/Gln) amidotransferase subunit B	III.3.2	30	1	12	12	55	nucleotide binding; catalytic activity		metabolic process	500	53.9168	4.99561
A5CQH3	CMM_1282	Putative CDP-glycerol:poly(Glycerophosphate) glycerophosphotransferase	II.2.3	31.54	1	11	11	41	catalytic activity	membrane	metabolic process	428	48.1744	6.94678
A5CN53	CMM_0466	Uncharacterized protein	V.2.1	40.68	1	11	11	59				295	30.4928	4.39893
A5CRR0	CMM_1717	Putative molybdate ABC transporter ATP-binding subunit	IV.1.7	60.61	1	11	11	49	nucleotide binding; catalytic activity		metabolic process	264	28.6929	5.49072
A5CUX8	CMM_2831	Putative nucleoside-diphosphate-sugar epimerase	I.1.12	54.7	1	11	11	48	catalytic activity		metabolic process	287	29.0892	4.7417
A5CPE3	CMM_0904	Probable malate:quinone oxidoreductase	I.1.3	28.05	1	11	11	36	catalytic activity		metabolic process	492	53.83	6.85889
A5CU17	CMM_2521	Bifunctional protein FolD	I.5.6	43.67	1	11	11	53	catalytic activity		metabolic process	300	31.3969	5.69385
A5CP03	CMM_0764	PpaF protein	IV.6.1	74.62	1	11	11	192	catalytic activity		metabolic process	327	31.2999	8.5874
A5CUD0	CMM_2634	Uncharacterized protein	V.2.1	39.85	1	10	10	31	catalytic activity		metabolic process	394	40.7442	4.60205
A5CUY9	CMM_2842	Putative sugar ABC transporter, substrate binding protein	IV.1.5	40.16	1	10	10	39				366	36.9044	4.48779
A5CP49	CMM_0810	Dihydrodipicolinate synthase	I.2.5	40.33	1	10	10	41	catalytic activity		metabolic process	305	32.9949	4.89404
A5CNJ7	CMM_0609	Putative aldose-1-epimerase	I.1.1	53	1	10	10	51	catalytic activity		metabolic process	317	34.7235	4.95752
A5CQV2	CMM_1411	Putative secreted protein	V.2.1	37.34	1	10	10	63				549	55.3711	4.52588
A5CMB5	CMM_0179	NAD-dependent aldehyde dehydrogenase	V.1.3	30.5	1	10	10	55	catalytic activity		metabolic process	459	48.8377	4.70361
A5CPA0	CMM_0861	50S ribosomal protein L7/L12	III.3.1	89.76	1	10	10	68	structural molecule activity	ribosome	metabolic process	127	13.099	4.67822
A5CTS8	CMM_2432	Putative aldo/keto reductase	V.1.3	43.03	1	10	10	56				330	35.3118	4.86865
A5CTS5	CMM_2428	Ribonucleoside-diphosphate reductase subunit beta	I.3.1	36.86	1	10	10	58	catalytic activity; metal ion binding		metabolic process	331	38.312	4.75439
A5CQY4	CMM_1443	NH(3)-dependent NAD(+) synthetase	I.5.4	54.21	1	10	10	83	nucleotide binding; catalytic activity		metabolic process	273	29.575	4.79248
A5CU64	CMM_2568	10 kDa chaperonin	IV.4.1	88.78	1	10	10	187	nucleotide binding	cytoplasm	metabolic process	98	10.5275	4.67822
A5CLJ8	pCM1_0015	Putative secreted protein	IV.2.5	54.22	1	9	9	54				367	37.7696	5.73193
A5CN98	CMM_0511	Uncharacterized protein	V.2.1	55.7	1	9	9	70	protein binding			298	31.4084	4.95752
A5CMX1	CMM_0385	Putative L-threonine aldolase	I.2.4	40.38	1	9	9	45	catalytic activity		metabolic process	369	39.4938	5.16064
A5CQ94	CMM_1203	Putative ATP-dependant serine protease protein containing a PDZ domain, family S16	IV.7.3	34.71	1	9	9	42	catalytic activity; protein binding; nucleotide binding		metabolic process	363	37.673	4.58936
A5CU75	CMM_2579	30S ribosomal protein S9	III.3.1	71.43	1	9	9	59	structural molecule activity	ribosome	metabolic process	161	17.3533	10.272
A5CT77	CMM_2232	Carbonic anhydrase	I.6.1	62.73	1	9	9	76	catalytic activity; metal ion binding		metabolic process	220	22.8779	5.05908
A5CQS6	CMM_1385	Uridylate kinase	I.3.2	63.45	1	9	9	64	nucleotide binding; catalytic activity	cytoplasm	metabolic process	238	25.2909	5.73193
A5CUN0	CMM_2733	Putative sugar ABC transporter, substrate binding protein	IV.1.5	40.04	1	9	9	86	transporter activity		transport	452	47.1539	4.31006
A5CTA5	CMM_2260	Putative serine peptidase, family S8	IV.7.3	44.03	1	8	8	43	catalytic activity		metabolic process	427	42.7082	5.46533
A5CNI6	CMM_0598	Delta-aminolevulinic acid dehydratase	I.5.7	45.09	1	8	8	60	catalytic activity; metal ion binding		metabolic process	326	35.2296	4.85596
A5CSM5	CMM_2033	Uncharacterized protein	IV.1.1	51.61	1	8	8	147				341	33.8675	4.43701
A5CLR6	pCM2_0053	Putative extracellular serine protease	IV.6.1	47.65	1	7	12	40	catalytic activity		metabolic process	277	29.622	8.55811
A5CLK1	pCM1_0018	Putative secreted protein	IV.2.5	41.27	1	5	8	37				252	26.352	5.2749
A5CSN5	CMM_2043	Uncharacterized protein	V.2.2	64.57	1	5	9	74				302	30.7614	5.57959
A5CS53	CMM_1861	UDP-N-acetylmuramoylalanine--D-glutamate ligase	II.2.1	51.75	1	19	19	59	nucleotide binding; catalytic activity	cytoplasm	regulation of biological process; metabolic process; cell division; cell organization and biogenesis	514	54.6111	5.021
A5CLT8	CMM_0006	DNA gyrase subunit B	III.1.1	38.33	1	18	18	54	nucleotide binding; metal ion binding; DNA binding; catalytic activity	chromosome; cytoplasm	metabolic process	681	75.5214	5.46533
A5CRT9	CMM_1746	Putative sporulation transcription regulator WhiA	IV.3.1	59.51	1	15	15	46	DNA binding		metabolic process; regulation of biological process	326	35.4347	9.15869
A5CRS1	CMM_1728	Putative ABC transporter, ATP-binding protein	IV.1.1	66.41	1	15	15	78	nucleotide binding; catalytic activity		metabolic process; transport	256	27.8814	5.38916
A5CSN4	CMM_2042	Putative metallopeptidase, M16 family	IV.7.1	52.99	1	14	14	47	catalytic activity; metal ion binding		metabolic process	451	48.0765	4.80518
A5CT05	CMM_2160	1-deoxy-D-xylulose 5-phosphate reductoisomerase	I.1.5	62.5	1	14	14	47	protein binding; catalytic activity; metal ion binding; nucleotide binding		metabolic process	360	38.29	5.26221
A5CR97	CMM_1555	Elongation factor 4 OS=Clavibacter michiganensis subsp. michiganensis (strain NCPPB 382) GN=lepA PE=3 SV=1 - [LEPA_CLAM3]	III.3.5	36.59	1	14	14	51	nucleotide binding; RNA binding; catalytic activity	membrane	metabolic process; regulation of biological process	615	67.0067	5.37646
A5CMD7	CMM_0201	Putative glycosyl hydrolase, family 2	I.1.2	33.66	1	13	13	33	catalytic activity		metabolic process	618	69.2763	5.08447
A5CPX5	CMM_1085	Putative trehalose-phosphate synthase	I.1.5	29.76	1	13	13	54	catalytic activity		metabolic process	531	58.604	5.57959
A5CP15	CMM_0776	Putative NAD-dependent aldehyde dehydrogenase	V.1.3	36.53	1	12	12	42	catalytic activity		metabolic process	501	53.3204	5.32568
A5CQU5	CMM_1404	DNA ligase	III.1.1	20.05	1	12	12	41	DNA binding; catalytic activity; metal ion binding		metabolic process; response to stimulus	853	90.2683	5.0083
A5CRI9	CMM_1646	RNA polymerase sigma factor SigA	IV.3.4	30.49	1	12	13	43	DNA binding	cytoplasm	metabolic process; regulation of biological process	492	52.314	5.43994
A5CUA8	CMM_2612	50S ribosomal protein L22 OS=Clavibacter michiganensis subsp. michiganensis (strain NCPPB 382) GN=rplV PE=3 SV=1 - [RL22_CLAM3]	III.3.1	72.31	1	12	12	56	RNA binding; structural molecule activity	ribosome	metabolic process	130	14.3138	10.3159
A5CUB3	CMM_2617	50S ribosomal protein L3	III.3.1	66.82	1	12	12	75	RNA binding; structural molecule activity	ribosome	metabolic process	217	23.1703	10.5063
A5CQ36	CMM_1145	Putative deacetylase	II.2.4	57.77	1	11	11	25	catalytic activity		metabolic process	296	34.0107	5.17334
A5CT46	CMM_2201	Cysteine desulfurase	I.5.11	47.34	1	11	11	40	catalytic activity		metabolic process	433	46.0481	6.0874
A5CNI4	CMM_0596	Porphobilinogen deaminase	I.5.7	60.06	1	11	11	45	catalytic activity		metabolic process	328	33.6216	5.16064
A5CP32	CMM_0793	Putative myo-inositol dehydrogenase	I.1.11	52.24	1	11	11	39	catalytic activity		metabolic process	335	35.051	5.13525
A5CVB2	CMM_2963	30S ribosomal protein S6	III.3.1	78.57	1	11	11	86	RNA binding; structural molecule activity	ribosome	metabolic process	154	16.4294	5.66846
A5CRW3	CMM_1770	ATP phosphoribosyltransferase	I.2.6	46.24	1	11	11	42	nucleotide binding; metal ion binding; catalytic activity	cytoplasm	metabolic process	279	29.6347	5.09717
A5CUK6	CMM_2709	Putative metallopeptidase, family M23	IV.6.3	48.85	1	10	10	60				391	39.5721	4.90674
A5CS40	CMM_1848	Histidinol dehydrogenase	I.2.6	43.32	1	10	10	37	catalytic activity; metal ion binding; nucleotide binding		metabolic process	434	44.4603	5.09717
A5CSQ9	CMM_2067	D-alanyl-D-alanine carboxypeptidase	II.2.1	27.77	1	10	10	34	catalytic activity		metabolic process	479	48.1127	5.0083
A5CUV4	CMM_2807	Putative polyprenyl diphosphate synthase	I.5.8	30.25	1	10	10	30	catalytic activity		metabolic process	357	38.3229	4.91943
A5CS21	CMM_1829	Putative dihydroxyacetone kinase	I.1.1	37.84	1	10	10	40	catalytic activity		metabolic process	333	34.551	4.71631
A5CRN7	CMM_1694	L-cysteine:1D-myo-inositol 2-amino-2-deoxy-alpha-D-glucopyranoside ligase	III.3.2	30.52	1	10	10	37	nucleotide binding; catalytic activity; metal ion binding	cytoplasm	metabolic process	426	45.3408	4.75439
A5CTW3	CMM_2468	Putative iron-dependent repressor	IV.3.1	51.29	1	10	10	42	DNA binding; metal ion binding; protein binding		regulation of biological process	232	25.3941	5.03369
A5CNG4	CMM_0576	Naphthoate synthase	I.5.8	49.5	1	10	10	47	catalytic activity		metabolic process	303	33.3987	6.13818
A5CP98	CMM_0859	Putative oxidoreductase	V.1.3	37.23	1	10	10	36	catalytic activity		metabolic process	325	35.8471	5.37646
A5CUA7	CMM_2611	30S ribosomal protein S3	III.3.1	40.75	1	10	10	42	RNA binding; structural molecule activity	ribosome	metabolic process	265	29.5356	10.5796
A5CS59	CMM_1867	Ribosomal RNA small subunit methyltransferase H	II.1.1	44.97	1	10	10	39	catalytic activity	cytoplasm	metabolic process	318	34.7304	5.89697
A5CUR8	CMM_2770	Uncharacterized protein	I.1.11	29.41	1	10	10	44				357	39.2955	5.36377
A5CSK6	CMM_2014	1-(5-phosphoribosyl)-5-[(5-phosphoribosylamino)methylideneamino] imidazole-4-carboxamide isomerase	I.2.6	56.63	1	10	10	55	catalytic activity; nucleotide binding	cytoplasm	metabolic process	249	26.1374	4.56396
A5CUB8	CMM_2622	30S ribosomal protein S7	III.3.1	69.23	1	10	10	59	RNA binding; structural molecule activity	ribosome	metabolic process	156	17.2144	10.2427
A5CQ78	CMM_1187	Putative Mg2+ transporter, MgtE family	IV.1.16	25.67	1	9	9	17	catalytic activity; protein binding; nucleotide binding		metabolic process	448	48.8241	4.86865
A5CRQ1	CMM_1708	Probable D-alanyl-D-alanine carboxypeptidase	II.2.1	27.23	1	9	9	30	catalytic activity		metabolic process	404	40.8831	4.58936
A5CS29	CMM_1837	Putative menaquinol-cytochrome c reductase cytochrome B subunit	I.1.4	18.42	1	9	9	37	catalytic activity	membrane	metabolic process	543	59.9466	7.59131
A5CRC6	CMM_1584	Putative tRNA-dihydrouridine synthase	III.3.4	29.51	1	9	9	27	catalytic activity; nucleotide binding		metabolic process	410	43.4271	5.8335
A5CR34	CMM_1493	Gamma-glutamyl phosphate reductase	I.2.3	25.23	1	9	9	26	catalytic activity; nucleotide binding	cytoplasm	metabolic process	432	44.7727	5.73193
A5CPW3	CMM_1073	Putative glycosyl hydrolase, family 15	I.1.8	24.44	1	9	9	31	catalytic activity		metabolic process	622	68.1256	4.94482
A5CN09	CMM_0423	Putative sugar ABC transporter, binding protein	IV.1.5	29.64	1	9	9	35				334	34.6931	4.32275
A5CN72	CMM_0485	3',5'-cyclic adenosine monophosphate phosphodiesterase CpdA	IV.3.8	49.5	1	9	9	40	nucleotide binding; catalytic activity; metal ion binding		metabolic process	301	31.3805	5.46533
A5CP76	CMM_0837	Putative glycosyl hydrolase, family 15	II.2.8	20.79	1	9	9	38	catalytic activity		metabolic process	611	66.5202	5.12256
A5CUN2	CMM_2735	Fructose-1,6-bisphosphatase	I.1.1	39.94	1	9	9	46	catalytic activity; metal ion binding		metabolic process	328	34.3054	5.13525
A5CR74	CMM_1532	Putative proline/glycine/betaine/choline ABC transporter, substrate-binding protein	IV.1.6	32.69	1	9	9	83	transporter activity		transport	309	32.2541	4.32275
A5CQ57	CMM_1166	ATP synthase subunit delta	IV.1.18	59.32	1	9	9	44	catalytic activity; transporter activity	membrane	metabolic process; transport	263	27.8008	5.51611
A5CRP6	CMM_1703	Putative glycine/betaine ABC transporter,substrate-binding protein	IV.1.6	32.54	1	8	8	41	transporter activity		transport	335	35.7598	4.4751
A5CS28	CMM_1836	Putative menaquinol-cytochrome C reductase iron-sulfur subunit	I.1.4	27.37	1	8	8	25	catalytic activity; metal ion binding		metabolic process	369	40.1533	5.43994
A5CPX0	CMM_1080	Conserved membrane protein	IV.1.9	23.77	1	8	8	31				631	62.6231	5.24951
A5CSY2	CMM_2137	Putative sugarkinase	I.1.13	26.28	1	8	8	36	catalytic activity		metabolic process	312	31.8323	5.17334
A5CTC8	CMM_2283	Putative metal ABC transporter, substrate-binding protein	IV.1.7	33.23	1	8	8	48				310	32.1588	4.48779
A5CRT8	CMM_1745	Superoxide dismutase	IV.5.1	59.13	1	8	8	76	antioxidant activity; catalytic activity; metal ion binding		metabolic process; response to stimulus	208	23.2356	5.35107
A5CUB2	CMM_2616	50S ribosomal protein L4	III.3.1	38.53	1	8	8	75	RNA binding; structural molecule activity	ribosome	metabolic process	218	23.0443	9.59814
A5CNK4	CMM_0616	Uncharacterized protein	V.2.1	35.04	1	8	8	57				254	25.5479	4.70361
A5CV02	CMM_2857	Uncharacterized protein	V.2.2	55.48	1	7	7	14				146	15.4616	4.52588
A5CUC1	CMM_2625	Hypothetical membrane protein	V.2.2	29.7	1	7	7	34				330	36.8359	5.33838
A5CQY5	CMM_1444	Uncharacterized protein	V.2.2	47.66	1	7	7	35				235	25.515	5.73193
A5CQQ6	CMM_1365	Putative membrane-associated serine protease,subfamily S1C	IV.7.3	32.33	1	7	7	33	catalytic activity	membrane	metabolic process	399	40.3364	5.04639
A5CTS6	CMM_2431	Uncharacterized protein	V.2.2	21.66	1	7	7	43				157	15.3775	4.41162
A5CR21	CMM_1480	Putative expansin	IV.6.3	48.62	1	7	7	94				253	26.4936	9.18799
A5CPK9	CMM_0969	Succinate dehydrogenase iron-sulfur subunit	I.1.3	71.15	1	16	16	39	catalytic activity; metal ion binding		metabolic process	253	28.3802	6.03662
A5CS50	CMM_1858	UDP-N-acetylmuramate--L-alanine ligase	II.2.1	42.23	1	16	16	57	nucleotide binding; catalytic activity	cytoplasm	regulation of biological process; metabolic process; cell division; cell organization and biogenesis	476	50.1763	5.0083
A5CSW6	CMM_2121	Putative glutathione S-transferase	IV.5.8	48.95	1	15	15	52	protein binding; catalytic activity		metabolic process	382	42.576	5.08447
A5CSV7	CMM_2112	Uncharacterized protein	V.2.1	52.97	1	15	15	58	catalytic activity		metabolic process	489	53.182	5.51611
A5CSD0	CMM_1938	Putative peptidase, family M20D	IV.7.1	55.72	1	14	14	63	catalytic activity		metabolic process	411	42.8638	4.84326
A5CUA2	CMM_2605	50S ribosomal protein L5	III.3.1	73.23	1	14	14	99	RNA binding; structural molecule activity	ribosome	metabolic process	198	21.8444	9.26123
A5CRX6	CMM_1783	Carbamoyl-phosphate synthase small chain	I.3.2	56.89	1	13	13	88	nucleotide binding; catalytic activity		metabolic process	392	41.9852	5.2749
A5CSC2	CMM_1930	Uncharacterized protein	V.2.1	36.28	1	12	12	35	catalytic activity		metabolic process	521	54.8058	5.31299
A5CQ59	CMM_1168	ATP synthase gamma chain	IV.1.18	46.82	1	12	12	49	nucleotide binding; catalytic activity; transporter activity	membrane	metabolic process; transport	299	32.6802	8.92432
A5CNZ2	CMM_0753	Phosphoribosylaminoimidazole-succinocarboxamide synthase	I.3.1	46.73	1	12	12	39	nucleotide binding; catalytic activity		metabolic process	306	34.1271	4.84326
A5CUV3	CMM_2806	Putative ferredoxin/ferredoxin-NADP reductase	I.5.8	34.87	1	12	12	46	catalytic activity		metabolic process	456	50.4349	5.18604
A5CNJ2	CMM_0604	PfkA protein	I.1.1	42.82	1	12	12	46	nucleotide binding; catalytic activity; metal ion binding	cytoplasm	metabolic process	341	36.3077	6.39209
A5CR68	CMM_1526	Putative oxidoreductase	V.1.3	55.02	1	12	12	65	catalytic activity		metabolic process	289	31.1722	4.86865
A5CMU9	CMM_0363	Putative Fe3+-hydroxamate ABC transporter,substrate binding protein	IV.1.7	41.31	1	11	11	31				351	37.5377	4.60205
A5CMD2	CMM_0196	Putative sugar ABC transporter, binding protein	IV.1.5	31.14	1	11	11	35	transporter activity; catalytic activity		transport; metabolic process	440	46.4656	4.89404
A5CV91	CMM_2943	Putative 2-keto acid dehydrogenase,dehydrogenase E1 beta component	I.1.3	47.01	1	11	11	44	catalytic activity		metabolic process	351	37.8342	5.14795
A5CQU0	CMM_1399	Alpha-1,4 glucan phosphorylase	I.1.8	19.86	1	11	11	38	catalytic activity		metabolic process	851	93.0788	5.47803
A5CPD5	CMM_0896	Acetate kinase	I.1.7	41.67	1	11	11	59	nucleotide binding; metal ion binding; catalytic activity	cytoplasm	metabolic process	396	41.9204	5.13525
A5CQ68	CMM_1177	2,3,4,5-tetrahydropyridine-2,6-dicarboxylate N-succinyltransferase	I.2.5	35.24	1	10	10	26	metal ion binding; catalytic activity	cytoplasm	metabolic process	332	34.1878	5.79541
A5CNV3	CMM_0714	Uncharacterized protein	II.2.7	28.53	1	10	10	31				624	66.6138	4.64014
A5CNZ7	CMM_0758	Phosphoribosylformylglycinamidine cyclo-ligase	I.3.1	49.05	1	10	10	33	nucleotide binding; catalytic activity	cytoplasm	metabolic process	369	37.1871	4.85596
A5CU19	CMM_2523	Putative glycosidase	I.1.8	23.72	1	10	10	34	catalytic activity		metabolic process	548	57.2614	4.97021
A5CMI3	CMM_0247	Putative oxidoreductase/dehydrogenase	V.1.3	29.46	1	10	10	37	catalytic activity		metabolic process	404	43.2658	5.2876
A5CSI7	CMM_2000	Arginine biosynthesis bifunctional protein ArgJ	I.2.3	32.81	1	10	10	39	catalytic activity	cytoplasm	metabolic process	384	39.0974	4.77979
A5CNR0	CMM_0671	Conserved membrane protein	V.2.1	33.95	1	10	10	49		membrane		701	70.0777	5.16064
A5CNW6	CMM_0727	Putative hydrolase	V.1.6	67.79	1	10	10	82	catalytic activity		metabolic process	267	28.4123	5.08447
A5CRW0	CMM_1767	Anthranilate synthase component I	I.2.7	39.69	1	10	10	57	catalytic activity		metabolic process	519	55.9525	5.13525
A5CR61	CMM_1519	Glucose-6-phosphate 1-dehydrogenase	I.1.2	29.45	1	9	9	30	catalytic activity; nucleotide binding		metabolic process	455	49.5998	5.73193
A5CQT3	CMM_1392	Uncharacterized protein	V.2.1	51.64	1	9	9	32				244	26.1398	5.61768
A5CN15	CMM_0429	Uncharacterized protein	V.2.1	47.39	1	9	9	35				249	25.9335	9.30518
A5CNC6	CMM_0538	Uracil phosphoribosyltransferase	I.3.2	63.68	1	9	9	42	nucleotide binding; metal ion binding; catalytic activity		metabolic process	212	22.7709	4.84326
A5CRC2	CMM_1580	Putative oxidoreductase	V.1.3	32.52	1	9	9	36	catalytic activity		metabolic process	369	39.3308	4.91943
A5CUU3	CMM_2796	Putative oxidoreductase	V.1.3	33.65	1	9	9	34	catalytic activity		metabolic process	312	33.1749	4.76709
A5CV92	CMM_2944	Putative 2-keto acid dehydrogenase,dehydrogenase E1 beta component	I.1.3	38.38	1	9	9	48	catalytic activity		metabolic process	370	40.6711	5.021
A5CU95	CMM_2599	50S ribosomal protein L15	III.3.1	53.13	1	9	9	45	RNA binding; structural molecule activity	ribosome	metabolic process	192	19.9719	10.2427
A5CT40	CMM_2197	Aminomethyltransferase	I.2.4	31.53	1	9	9	40	catalytic activity; protein binding	cytoplasm	metabolic process	406	41.8815	4.7417
A5CQD4	CMM_1243	Putative sugar ABC transporter, substrate-binding protein	IV.1.5	32.89	1	9	9	39				380	39.7107	4.4751
A5CS76	CMM_1884	Putative transcriptional regulator with FHA domain	IV.3.1	60	1	9	9	68	protein binding			160	17.1646	4.99561
A5CTL8	CMM_2372	Putative dihydrolipoamide dehydrogenase (E3) component	I.1.3	28.08	1	8	8	22	catalytic activity; nucleotide binding	cytoplasm	metabolic process; cellular homeostasis; regulation of biological process	495	51.4696	5.05908
A5CP16	CMM_0777	Uncharacterized protein	I.1.11	49.35	1	8	8	37	catalytic activity		metabolic process	308	32.7622	4.93213
A5CMG3	CMM_0227	Putative acetyl xylan esterase	IV.5.6	45.77	1	8	8	30	catalytic activity		metabolic process	319	34.2048	5.04639
A5CV47	CMM_2900	Deoxycytidine triphosphate deaminase	I.3.3	59.7	1	8	8	28	catalytic activity		metabolic process	201	22.0722	5.57959
A5CU97	CMM_2601	30S ribosomal protein S5	III.3.1	55.2	1	8	8	34	RNA binding; structural molecule activity	ribosome	metabolic process	221	23.0424	10.3306
A5CPM1	CMM_0981	DeoA protein	I.3.1	22.92	1	8	8	32	catalytic activity		metabolic process	432	45.6174	5.07178
A5CP80	CMM_0841	Inorganic pyrophosphatase	I.6.1	47.43	1	8	8	38	metal ion binding; catalytic activity	cytoplasm	metabolic process	175	19.5135	4.57666
A5CQR4	CMM_1373	50S ribosomal protein L19	III.3.1	53.51	1	8	8	53	structural molecule activity	ribosome	metabolic process	114	12.862	10.1548
A5CU98	CMM_2602	50S ribosomal protein L18	III.3.1	46.34	1	8	8	46	RNA binding; structural molecule activity	ribosome	metabolic process	123	13.1621	11.2095
A5CRV0	CMM_1757	Putative response regulator involved in antitermination	IV.3.2	48.02	1	8	8	36	signal transducer activity; RNA binding		regulation of biological process; response to stimulus	202	22.2057	4.84326
A5CN62	CMM_0475	Putative exonuclease III	III.1.6	28.78	1	8	8	29	catalytic activity		metabolic process; response to stimulus	278	31.1925	4.75439
A5CU23	CMM_2527	Putative oxidoreductase	V.1.3	34.99	1	8	8	53				343	36.9947	4.89404
A5CN21	CMM_0435	Putative iron-siderophore ABC transporter,binding protein	IV.1.7	42.18	1	8	8	59				358	36.3314	4.64014
A5CS68	CMM_1876	Putative glucokinase, putative catabolite repressor	I.1.13	38.63	1	8	8	47	catalytic activity	cytoplasm	metabolic process	321	33.1171	5.38916
A5CRF6	CMM_1613	Uncharacterized protein	V.2.1	50.88	1	8	8	44				283	30.2281	4.79248
A5CR00	CMM_1459	Putative ribose 5-phosphate isomerase	I.1.2	75.93	1	8	8	76	catalytic activity		metabolic process	162	17.2516	5.46533
A5CQ27	CMM_1137	Uncharacterized protein	V.2.1	16.18	1	7	8	20				680	69.536	4.79248
A5CRZ3	CMM_1800	Uncharacterized protein	I.5.6	26.25	1	7	7	69				381	39.8062	5.18604
A5CT89	CMM_2245	Putative threonine dehydratase	I.2.5	22.51	1	7	7	32	catalytic activity		metabolic process	422	44.4658	5.63037
A5CSQ4	CMM_2062	Putative DNA-binding ferritin-like protein	IV.5.4	52.69	1	7	7	53	DNA binding; metal ion binding; catalytic activity		cellular homeostasis; response to stimulus; metabolic process	186	20.8663	4.86865
A5CRE0	CMM_1598	Putative membrane-bound acyltranferase	II.2.10	17.95	1	7	7	32	catalytic activity	membrane	metabolic process	730	77.1833	7.21045
A5CMT7	CMM_0351	Putative sugar ABC transporter, substrate binding protein	IV.1.5	27.1	1	7	7	26				428	44.6163	4.65283
A5CVB8	CMM_2970	D-alanine--D-alanine ligase	II.2.1	20.25	1	7	7	28	nucleotide binding; metal ion binding; catalytic activity	cytoplasm	metabolic process; regulation of biological process; cell organization and biogenesis	321	33.0904	5.09717
A5CMN2	CMM_0296	Putative sugar ABC transporter, substrate-binding protein	IV.1.5	29.53	1	7	7	29	transporter activity		transport	430	44.3177	4.55127
A5CMA6	CMM_0170	Putative tautomerase	I.1.12	63.43	1	7	7	41	catalytic activity		metabolic process	134	14.6396	4.67822
A5CU76	CMM_2580	50S ribosomal protein L13	III.3.1	76.35	1	7	8	61	structural molecule activity	ribosome	metabolic process	148	16.1395	9.67139
A5CPZ6	CMM_1106	Uncharacterized protein	V.2.1	42.8	1	7	7	39	catalytic activity		metabolic process	257	27.5391	4.90674
A5CQZ9	CMM_1458	Uncharacterized protein	V.2.1	48.08	1	7	7	65	catalytic activity		metabolic process	208	23.1147	4.91943
A5CS27	CMM_1835	Putative ubiquinol-cytochrome c reductase cytochrome c subunit	I.1.4	58.27	1	7	7	142	metal ion binding			266	27.3577	5.07178
A5CLN6	pCM2_0025	Putative secreted protein	IV.2.5	36.4	1	6	6	29				261	26.6703	6.17627
A5CNQ6	CMM_0667	Putative secreted phosphoesterase	II.2.5	14.98	1	6	6	13	catalytic activity		metabolic process	641	67.9108	5.85889
A5CNS4	CMM_0685	Antimicrobial peptide ABC transporter, permease component	IV.1.8	18.34	1	6	6	25		membrane		409	41.6908	4.61475
A5CQQ8	CMM_1367	30S ribosomal protein S16	III.3.1	67.15	1	6	7	34	structural molecule activity	ribosome	metabolic process	137	15.3382	9.24658
A5CR63	CMM_1521	Putative transcriptional regulator, LytR family	IV.3.1	16.09	1	6	6	23				435	44.7526	4.95752
A5CNI7	CMM_0599	Glutamate-1-semialdehyde 2,1-aminomutase	I.5.7	20.88	1	6	6	28	catalytic activity	cytoplasm	metabolic process	455	47.1022	5.19873
A5CPK0	CMM_0960	6,7-dimethyl-8-ribityllumazine synthase	I.5.3	36.88	1	6	6	35	catalytic activity		metabolic process	160	16.0095	5.10986
A5CUA6	CMM_2610	50S ribosomal protein L16	III.3.1	58.27	1	6	6	42	RNA binding; structural molecule activity	ribosome	metabolic process	139	15.4333	10.6382
A5CT95	CMM_2250	Uncharacterized protein	V.2.2	21.2	1	6	6	84				764	74.4637	10.6089
A5CLR0	pCM2_0047	Uncharacterized protein	V.2.2	29.13	1	6	6	99				254	26.7686	8.93896
A5CLW7	CMM_0035	Putative dehydrogenase/oxidoreductase	V.1.3	39.02	1	6	6	86	catalytic activity; nucleotide binding		metabolic process	369	38.3784	4.89404
A5CQG8	CMM_1277	Uncharacterized protein	V.2.1	77.14	1	4	8	51				210	21.4958	5.23682
A5CRU2	CMM_1749	UvrABC system protein A	III.1.3	29.09	1	21	21	47	nucleotide binding; DNA binding; catalytic activity; metal ion binding	cytoplasm	metabolic process; response to stimulus; cell communication	973	106.535	6.0874
A5CN83	CMM_0496	Uncharacterized protein	V.2.1	34.15	1	14	14	29				571	61.9518	5.22412
A5CUK8	CMM_2711	Uncharacterized protein	V.2.1	40	1	13	13	37				465	48.8084	6.21436
A5CRG1	CMM_1618	Beta-ketoacyl-[acyl-carrier-protein] synthase III	I.4.1	53.41	1	13	13	36	catalytic activity	cytoplasm	metabolic process	337	35.2902	4.91943
A5CQI4	CMM_1292	Nicotinate phosphoribosyltransferase	I.5.4	46.35	1	12	12	41	catalytic activity	cytoplasm	metabolic process	438	45.8336	5.74463
A5CPD3	CMM_0894	Putative nucleoside-diphosphate-sugar epimerase	I.1.12	78.34	1	12	12	44	catalytic activity		metabolic process	217	22.7156	4.71631
A5CPB3	CMM_0872	Putative cystathionine beta-synthase	I.2.8	44.49	1	12	12	62	catalytic activity; protein binding; nucleotide binding	cytoplasm	metabolic process	454	48.1545	4.91943
A5CS73	CMM_1881	Putative ATPase	II.1.2	57.41	1	11	11	37				270	29.1174	7.56201
A5CSB5	CMM_1923	GgtA protein	IV.5.8	30.02	1	11	11	37	catalytic activity		metabolic process	603	63.213	5.24951
A5CQJ9	CMM_1308	Peptide chain release factor RF-2	III.3.3	52.86	1	11	11	70	RNA binding	cytoplasm	metabolic process; cell organization and biogenesis	367	40.8714	4.7417
A5CVB5	CMM_2967	Thioredoxin reductase	IV.5.2	53.04	1	11	11	60	antioxidant activity; catalytic activity; nucleotide binding	cytoplasm	metabolic process; response to stimulus	345	36.2211	4.70361
A5CT25	CMM_2180	Putative peptide ABC transporter, substrate-binding protein	IV.1.4	22.53	1	10	10	25	transporter activity		transport	617	64.9954	4.69092
A5CPQ6	CMM_1016	Putative glycosyl transferase	II.2.9	38.03	1	10	10	29	catalytic activity		metabolic process	284	30.962	7.45947
A5CQK9	CMM_1318	3-phosphoshikimate 1-carboxyvinyltransferase	I.2.7	40.25	1	10	10	25	catalytic activity	cytoplasm	metabolic process	487	49.7629	4.89404
A5CT68	CMM_2223	Ribosome-binding ATPase YchF	III.3.5	46.22	1	10	10	37	nucleotide binding; transporter activity; catalytic activity		metabolic process; transport	357	38.6401	4.61475
A5CNI2	CMM_0594	Uncharacterized protein	I.5.7	39.38	1	9	9	29				259	29.1566	5.021
A5CS25	CMM_1833	Anthranilate phosphoribosyltransferase	I.2.7	35.33	1	9	9	24	metal ion binding; catalytic activity		metabolic process	351	36.6602	5.43994
A5CS43	CMM_1851	Pseudouridine synthase	III.3.4	40.66	1	9	9	28	RNA binding; catalytic activity		metabolic process	305	32.8858	6.29053
A5CQ44	CMM_1153	Homoserine dehydrogenase	I.2.5	38.15	1	9	9	37	catalytic activity; nucleotide binding		metabolic process	443	45.8898	4.99561
A5CQ43	CMM_1152	Diaminopimelate decarboxylase	I.2.5	25.45	1	9	9	27	catalytic activity		metabolic process	499	52.0617	5.23682
A5CTX9	CMM_2484	Uncharacterized protein	IV.4.1	40.98	1	9	9	39				305	31.8401	5.51611
A5CPY5	CMM_1095	Putative acetolactate synthase, small (Regulatory) subunit	I.2.5	73.37	1	9	9	21	catalytic activity		metabolic process	169	18.3632	7.43018
A5CQ69	CMM_1178	Succinyl-diaminopimelate desuccinylase	I.2.5	34.52	1	9	9	43	catalytic activity		metabolic process	365	39.1699	4.91943
A5CU48	CMM_2552	GlpQ1 protein	I.4.1	30.97	1	9	9	29	catalytic activity		metabolic process	352	37.7312	5.47803
A5CLL9	pCM2_0008	Uncharacterized protein	V.2.2	45.74	1	9	9	35				317	33.8965	4.56396
A5CNW0	CMM_0721	Wzb protein	II.2.7	48.54	1	9	9	29	catalytic activity		metabolic process	239	25.6921	5.85889
A5CVB7	CMM_2969	Putative transcriptional regulator containing an aminotransferase domain	IV.3.1	34.55	1	9	9	39	catalytic activity		metabolic process	440	47.9026	5.05908
A5CQ26	CMM_1135	Putative F420-dependent NADP reductase	V.1.3	57.87	1	9	9	39	catalytic activity		metabolic process	216	23.0477	4.70361
A5CMS1	CMM_0335	Conserved membrane protein	V.2.1	20.53	1	8	8	16				604	63.0596	5.49072
A5CMV2	CMM_0366	Putative nucleoside-diphosphate-sugar epimerase	I.1.12	40.98	1	8	8	25	catalytic activity		metabolic process	266	28.1655	5.32568
A5CP38	CMM_0799	Putative oligopeptide ABC transporter, substrate-binding lipoprotein	IV.1.4	25.54	1	8	8	25	transporter activity		transport	560	58.9955	4.77979
A5CTZ8	CMM_2502	Mycothiol acetyltransferase	V.1.4	34.64	1	8	8	36	catalytic activity		metabolic process	306	32.1057	5.07178
A5CP51	CMM_0812	Putative aldehyde dehydrogenase	V.1.3	27.27	1	8	8	31	catalytic activity		metabolic process	506	51.1568	5.17334
A5CU28	CMM_2532	Putative formyltetrahydrofolate deformylase	I.3.1	45.86	1	8	8	26	catalytic activity		metabolic process	290	32.0905	6.22705
A5CNI8	CMM_0600	DNA/RNA endonuclease	III.2.2	45.05	1	8	8	37	catalytic activity; metal ion binding		metabolic process	273	30.0211	4.70361
A5CLU1	CMM_0009	Uncharacterized protein	V.2.2	45.75	1	8	8	27				212	22.4099	9.39307
A5CNA3	CMM_0516	Putative hydrolase, HAD superfamily	V.1.6	34.07	1	8	8	33	catalytic activity		metabolic process	273	29.802	4.85596
A5CUB4	CMM_2618	30S ribosomal protein S10	III.3.1	58.82	1	8	8	40	RNA binding; structural molecule activity	ribosome	metabolic process	102	11.5052	9.5835
A5CTL1	CMM_2365	Putative hydrolase	V.1.6	33.92	1	8	8	30	catalytic activity		metabolic process	286	31.589	5.12256
A5CP99	CMM_0860	50S ribosomal protein L10	III.3.1	57.31	1	8	8	38	RNA binding; structural molecule activity	ribosome	metabolic process	171	18.1647	8.85107
A5CRK0	CMM_1657	Uncharacterized protein	V.2.1	53.48	1	8	8	44				230	24.0903	4.80518
A5CUG1	CMM_2665	Uncharacterized protein	V.2.1	35.21	1	7	7	23				284	30.5484	5.13525
A5CPS0	CMM_1030	Putative glycosyl transferase	II.2.9	12.49	1	7	7	22	catalytic activity		metabolic process	1025	105.743	6.68311
A5CSJ2	CMM_1997	Ornithine carbamoyltransferase	I.2.3	37.79	1	7	7	27	catalytic activity	cytoplasm	metabolic process	307	32.9918	4.86865
A5CUR6	CMM_2769	Uncharacterized protein	V.2.1	32.05	1	7	7	30		membrane	metabolic process	312	33.9405	4.76709
A5CPX6	CMM_1086	Trehalose 6-phosphate phosphatase	I.1.5	36.73	1	7	7	26	catalytic activity; metal ion binding		metabolic process	275	29.3943	4.77979
A5CQK7	CMM_1316	Putative monophosphatase	V.1.6	41.85	1	7	7	22			metabolic process	270	29.0957	4.86865
A5CUT4	CMM_2787	50S ribosomal protein L11	III.3.1	40.56	1	7	7	41	RNA binding; structural molecule activity	ribosome	metabolic process	143	15.0361	9.39307
A5CVB0	CMM_2962	Single-stranded DNA-binding protein	III.1.1	37.16	1	7	7	65	DNA binding		metabolic process	183	19.0723	5.17334
A5CPE7	CMM_0908	Putative tyrosine-protein kinase	IV.3.7	22.63	1	7	7	26	nucleotide binding; catalytic activity; enzyme regulator activity	membrane	metabolic process; cell organization and biogenesis; regulation of biological process	464	48.7581	5.51611
A5CN82	CMM_0495	Putative glycosyltransferase	II.2.4	21.77	1	7	7	26	catalytic activity		metabolic process	441	46.9563	4.85596
A5CSM8	CMM_2036	Uncharacterized protein	V.2.2	19.66	1	6	6	13				417	43.8871	8.80713
A5CUG3	CMM_2667	Uncharacterized protein	V.2.1	32.48	1	6	6	12				274	29.5163	9.92041
A5CLN2	pCM2_0021	Uncharacterized protein	IV.2.5	24.76	1	6	6	12				416	43.8655	5.8335
A5CQ37	CMM_1146	Putative asparaginase	I.2.2	30.5	1	6	6	14	catalytic activity		metabolic process	341	34.3273	5.41455
A5CQ81	CMM_1190	Putative membrane protein with hydrolase activity	V.2.2	26.96	1	6	6	18	catalytic activity		metabolic process	345	36.0337	4.90674
A5CT98	CMM_2253	Uncharacterized protein	V.2.1	13.48	1	6	6	15	catalytic activity		metabolic process	853	92.8902	5.13525
A5CQL9	CMM_1328	Uncharacterized protein	V.2.1	41.15	1	6	6	27				226	22.9845	4.75439
A5CSG9	CMM_1977	Pseudouridine synthase	III.3.4	37.06	1	6	6	19	RNA binding; catalytic activity		metabolic process	286	31.101	5.19873
A5CTB5	CMM_2270	50S ribosomal protein L25	III.3.1	50.47	1	6	6	64	RNA binding; structural molecule activity	ribosome	metabolic process	214	22.9059	4.60205
A5CTY6	CMM_2491	Uncharacterized protein	V.2.1	47.87	1	6	6	37				188	19.4745	4.27197
A5CV69	CMM_2920	M18 family aminopeptidase	IV.7.4	24.59	1	6	6	25	catalytic activity; metal ion binding		metabolic process	431	44.9449	6.03662
A5CNM9	CMM_0640	Uncharacterized protein	I.4.3	51.66	1	6	6	42				151	16.9414	4.77979
A5CUT8	CMM_2791	UDP-N-acetylenolpyruvoylglucosamine reductase	II.2.1	16.41	1	6	6	21	catalytic activity; nucleotide binding	cytoplasm	regulation of biological process; metabolic process; cell division; cell organization and biogenesis	384	40.241	4.75439
A5CPK5	CMM_0965	Tryptophan--tRNA ligase	III.3.2	27	1	6	6	30	nucleotide binding; catalytic activity	cytoplasm	metabolic process	337	36.8311	6.20166
A5CU36	CMM_2540	Uncharacterized protein	V.2.2	26.19	1	6	6	48				168	17.2907	5.85889
A5CSJ9	CMM_2009	50S ribosomal protein L20	III.3.1	44.62	1	6	6	42	RNA binding; structural molecule activity	ribosome	metabolic process	130	14.5651	11.6929
A5CMU5	CMM_0359	Putative sugar ABC transporter, substrate-binding protein	IV.1.5	23.02	1	6	6	19	transporter activity		transport	404	41.6636	4.37354
A5CN25	CMM_0439	Putative phenolic acid decarboxylase	IV.5.7	52.84	1	6	6	46	catalytic activity		metabolic process	176	19.6288	5.07178
A5CQM2	CMM_1331	Putative two-component system response regulator	IV.3.2	40.37	1	6	6	34	signal transducer activity; DNA binding		regulation of biological process; response to stimulus; metabolic process	218	23.5845	5.71924
A5CLQ5	pCM2_0042	Uncharacterized protein	V.2.2	54.55	1	6	6	136				165	17.6198	9.99365
A5CM85	CMM_0150	Putative cell wall surface anchor family protein	II.2.5	8.91	1	5	5	9				1134	111.778	8.30908
A5CTH3	CMM_2327	Conserved membrane protein	V.2.1	29.97	1	5	5	23				307	32.3806	5.93506
A5CQG5	CMM_1274	Putative multidrug ABC transporter, ATP-binding protein	IV.1.8	25.72	1	5	5	20	nucleotide binding; catalytic activity		metabolic process	311	32.6441	7.03467
A5CPA7	CMM_0868	Putative alpha-glucoside ABC transport system,permease component	IV.1.5	12.77	1	5	5	18	transporter activity	membrane	transport	329	36.0137	10.3013
A5CTH0	CMM_2324	Uncharacterized protein	V.2.2	39.24	1	5	5	15				237	24.8871	4.43701
A5CUK7	CMM_2710	Uncharacterized protein	V.2.2	47.85	1	5	5	35				186	18.374	4.37354
A5CR26	CMM_1485	Nucleoside diphosphate kinase	I.3.1	62.59	1	5	5	39	nucleotide binding; catalytic activity		metabolic process	139	15.1128	5.2876
A5CMI1	CMM_0245	Uncharacterized protein	II.2.5	15.15	1	5	5	50				429	42.5653	4.69092
A5CN64	CMM_0477	Uncharacterized protein	IV.4.5	31.33	1	5	6	13				249	26.2884	4.77979
A5CQM7	CMM_1336	O-acetylhomoserine (Thiol)-lyase	I.2.8	24.34	1	5	5	20	catalytic activity		metabolic process	456	48.3268	5.35107
A5CRY3	CMM_1790	Putative anion ABC transporter, substrate-binding protein	IV.1.7	20.29	1	5	5	23	transporter activity	membrane	metabolic process; transport	350	36.1132	4.38623
A5CNJ6	CMM_0608	Uncharacterized protein	V.2.1	41.42	1	5	5	46	catalytic activity			268	28.1603	5.61768
A5CMA1	CMM_0166	Putative Fe3+-siderophore ABC transporter,binding protein	IV.1.7	18.84	1	5	5	23				329	33.3467	4.1958
A5CUA4	CMM_2607	50S ribosomal protein L14	III.3.1	38.52	1	5	5	34	RNA binding; structural molecule activity	ribosome	metabolic process	122	13.2654	10.1108
A5CMM4	CMM_0288	Putative oxidoreductase	V.1.3	31.98	1	5	5	36	catalytic activity		metabolic process	222	23.4501	5.26221
A5CT23	CMM_2178	Putative secreted protein	V.2.2	53.25	1	5	5	47				169	17.0676	4.97021
A5CM80	CMM_0145	Uncharacterized protein	V.2.1	38.7	1	5	5	138				230	23.2379	4.58936
A5CM63	CMM_0128	Uncharacterized protein	V.2.1	57.63	1	5	5	178				236	23.5267	5.49072
A5CTW2	CMM_2467	Putative secreted hydrolase	V.1.6	31.53	1	5	5	371	catalytic activity		metabolic process	314	32.4504	8.17725
A5CLX7	CMM_0043	PelA1 protein	IV.6.3	37.1	1	3	7	43	catalytic activity	extracellular	metabolic process	283	29.4077	6.78564
A5CRK4	CMM_1661	Enoyl-CoA hydratase / 3-hydroxyacyl-CoA dehydrogenase	I.4.1	32.16	1	16	17	44	catalytic activity		metabolic process	709	76.2683	5.71924
A5CU57	CMM_2561	Inosine-5'-monophosphate dehydrogenase	I.3.1	51	1	16	16	61	nucleotide binding; catalytic activity; protein binding; metal ion binding		metabolic process	500	52.7733	5.69385
A5CSG6	CMM_1974	GTPase Der	III.3.5	32.87	1	14	14	34	nucleotide binding; catalytic activity; transporter activity		regulation of biological process; response to stimulus; metabolic process; transport	502	55.5752	5.8208
A5CU74	CMM_2578	Phosphoglucosamine mutase	I.1.9	40.96	1	12	12	36	metal ion binding; catalytic activity		metabolic process	437	45.6752	4.89404
A5CSS9	CMM_2086	Uncharacterized protein	V.2.1	28.46	1	11	11	31			metabolic process	527	57.1811	6.40479
A5CPU3	CMM_1053	Putative ribosome-associated protein	III.3.4	64.19	1	11	11	66			metabolic process	229	25.1889	5.73193
A5CNA8	CMM_0521	Putative oxidoreductase/dehydrogenase	V.1.3	50.56	1	10	10	37	catalytic activity; nucleotide binding		metabolic process	358	37.4313	4.98291
A5CND2	CMM_0544	Pyrroline-5-carboxylate reductase	I.2.3	40.55	1	10	10	28	catalytic activity	cytoplasm	metabolic process	291	29.7827	5.18604
A5CNP1	CMM_0652	Putative Zn-dependant quinone oxidoreductase	I.1.4	56.39	1	10	10	32	catalytic activity; metal ion binding		metabolic process	321	33.2872	5.13525
A5CLS9	pCM2_0066	Uncharacterized protein	V.2.1	57.14	1	10	10	28				280	30.8055	5.94775
A5CNZ6	CMM_0757	Amidophosphoribosyltransferase	I.3.1	27.98	1	10	10	59	catalytic activity; metal ion binding		metabolic process	486	53.606	6.18896
A5CTK2	CMM_2356	Putative oxidoreductase	V.1.3	23.63	1	10	10	28	catalytic activity		metabolic process	677	72.2343	4.91943
A5CSH2	CMM_1980	Putative ATPase involved in partitioning	II.1.2	47.28	1	10	10	29	nucleotide binding; catalytic activity		metabolic process	294	31.3477	5.38916
A5CU12	CMM_2516	Putative aldose-1-epimerase	I.1.1	58.17	1	9	9	22	catalytic activity		metabolic process	306	32.3704	5.18604
A5CRH2	CMM_1629	Uncharacterized protein	V.2.1	47.27	1	9	9	16				275	28.636	5.07178
A5CSA1	CMM_1909	Putative UDP-glucose-4-epimerase	I.1.1	25.77	1	9	9	23	catalytic activity		metabolic process	555	62.5076	5.18604
A5CSA4	CMM_1912	Uncharacterized protein	V.1.3	14.05	1	9	9	19	catalytic activity; metal ion binding		metabolic process	961	100.574	5.56689
A5CQC8	CMM_1237	Putative NDP-sugar phosphate epimerase	I.1.12	33.78	1	9	9	38	catalytic activity		metabolic process	376	41.4134	5.021
A5CSL7	CMM_2025	Protein RecA	III.1.7	37.02	1	9	9	33	nucleotide binding; DNA binding; catalytic activity	cytoplasm	metabolic process; response to stimulus; cell communication	362	38.4223	6.72705
A5CSM7	CMM_2035	4-hydroxy-tetrahydrodipicolinate synthase	I.2.5	48.46	1	9	9	41	catalytic activity	cytoplasm	metabolic process	324	34.0606	5.64307
A5CP13	CMM_0774	Putative sugar kinase	I.1.2	36.92	1	9	9	30	catalytic activity		metabolic process	325	35.0179	4.98291
A5CVA8	CMM_2960	50S ribosomal protein L9	III.3.1	64	1	9	9	29	RNA binding; structural molecule activity	ribosome	metabolic process	150	16.0658	9.5542
A5CP83	CMM_0844	ATP-dependent zinc metalloprotease FtsH	II.1.1	23.72	1	9	9	30	nucleotide binding; catalytic activity; protein binding; metal ion binding	membrane	metabolic process; response to stimulus; regulation of biological process; cell division	666	71.4942	5.42725
A5CRT2	CMM_1739	Putative 6-phosphogluconolactonase	I.1.2	33.98	1	9	9	34	catalytic activity		metabolic process	256	27.3651	5.24951
A5CUD1	CMM_2635	Uncharacterized protein	V.2.1	62.66	1	9	9	26	protein binding			158	17.7471	5.43994
A5CPZ5	CMM_1105	Branched-chain amino acid aminotransferase	I.2.5	40.43	1	9	9	45	catalytic activity		metabolic process	376	40.8165	5.0083
A5CNA1	CMM_0514	PheA protein	I.2.7	30.5	1	8	8	22	catalytic activity		metabolic process	318	33.8526	5.32568
A5CRP1	CMM_1698	Putative nucleoside-diphosphate-sugar epimerase	I.1.12	28.97	1	8	8	22	catalytic activity		metabolic process	321	34.9468	5.92236
A5CM35	CMM_0100	Beta-glucosidase, glycosyl hydrolase family 3	I.1.8	13.45	1	8	8	17	catalytic activity		metabolic process	751	80.2238	5.03369
A5CS33	CMM_1841	Putative cytochrome c oxidase subunit I	I.1.4	15.15	1	8	8	22	catalytic activity; transporter activity; metal ion binding	membrane	transport; metabolic process	581	64.3752	8.6167
A5CLT3	CMM_0001	Chromosomal replication initiator protein DnaA	III.1.1	20.75	1	8	8	15	nucleotide binding; DNA binding; catalytic activity	cytoplasm	metabolic process; regulation of biological process	477	53.1895	6.53662
A5CR37	CMM_1496	Uncharacterized protein	V.2.1	40.75	1	8	8	22				508	52.0211	4.65283
A5CQN7	CMM_1346	D-alanine--D-alanine ligase	II.2.1	32.25	1	8	8	36	nucleotide binding; metal ion binding; catalytic activity	cytoplasm	regulation of biological process; metabolic process; cell organization and biogenesis	369	38.7867	4.66553
A5CSI0	CMM_1988	Uncharacterized protein	V.2.1	40.46	1	8	8	37	catalytic activity		metabolic process	346	35.9847	5.09717
A5CQQ3	CMM_1362	Signal recognition particle component	IV.2.4	37.46	1	8	8	31	nucleotide binding; catalytic activity		metabolic process; cell organization and biogenesis; transport	291	31.3025	6.7124
A5CQR2	CMM_1371	Methionine aminopeptidase	III.3.4	53.33	1	8	8	43	catalytic activity; metal ion binding		metabolic process	255	27.2675	5.07178
A5CV37	CMM_2890	Uncharacterized protein	V.2.1	49.66	1	8	8	31			metabolic process	292	30.2162	4.61475
A5CMZ0	CMM_0404	Putative two-component system response regulator	IV.3.2	53.47	1	8	9	35	signal transducer activity; DNA binding		regulation of biological process; response to stimulus; metabolic process	245	25.8347	4.77979
A5CRV6	CMM_1763	Tryptophan synthase beta chain	I.2.7	33.17	1	8	8	33	catalytic activity		metabolic process	404	43.0599	5.22412
A5CNW1	CMM_0722	Uncharacterized protein	II.2.7	26.38	1	8	9	34	catalytic activity; nucleotide binding; enzyme regulator activity	membrane	metabolic process; cell organization and biogenesis; regulation of biological process	470	49.9745	5.08447
A5CRB6	CMM_1574	Putative membrane bound esterase	V.1.6	31.91	1	7	7	19				467	47.8769	5.17334
A5CQN2	CMM_1341	3-isopropylmalate dehydratase large subunit	I.2.5	24.34	1	7	7	27	catalytic activity; metal ion binding		metabolic process	489	51.7728	4.91943
A5CN68	CMM_0481	Orotate phosphoribosyltransferase	I.3.2	38.04	1	7	7	27	metal ion binding; catalytic activity		metabolic process	184	19.5233	6.29053
A5CQP6	CMM_1355	Phosphopantetheine adenylyltransferase	I.5.1	66.26	1	7	7	24	nucleotide binding; catalytic activity	cytoplasm	metabolic process	163	17.4614	6.17627
A5CNF7	CMM_0569	Putative thioredoxin	IV.5.2	49.5	1	7	7	22	antioxidant activity; catalytic activity		metabolic process	202	21.2257	4.77979
A5CUB1	CMM_2615	50S ribosomal protein L23	III.3.1	59.6	1	7	7	30	nucleotide binding; RNA binding; structural molecule activity	ribosome	metabolic process	99	10.925	10.1694
A5CQ46	CMM_1155	Homoserine kinase	I.2.5	42.09	1	7	7	31	nucleotide binding; catalytic activity	cytoplasm	metabolic process	316	32.6111	5.13525
A5CR05	CMM_1464	ATP-dependent Clp protease proteolytic subunit	IV.4.2	58.46	1	7	7	50	catalytic activity	cytoplasm	metabolic process	195	20.9916	4.83057
A5CSP9	CMM_2057	Putative 2,5-diketo-D-gluconic acid reductase	I.1.2	45.85	1	7	8	48	catalytic activity		metabolic process	277	30.3982	4.94482
A5CRK6	CMM_1663	Putative ribonuclease D	III.2.2	22.18	1	7	7	27	nucleotide binding; catalytic activity		metabolic process	496	52.6742	5.17334
A5CRG2	CMM_1619	Putative malonyl CoA-acyl carrier protein transacylase	I.4.1	38.24	1	7	7	38	catalytic activity		metabolic process	306	31.2331	4.94482
A5CV67	CMM_2919	Deoxyribose-phosphate aldolase	I.3.1	45.42	1	7	7	41	catalytic activity	cytoplasm	metabolic process	240	24.2424	4.90674
A5CU15	CMM_2519	Galactokinase	I.1.9	28.5	1	7	7	36	nucleotide binding; metal ion binding; catalytic activity	cytoplasm	metabolic process	386	41.3649	4.71631
A5CM10	CMM_0075	Putative extracellular serine protease	IV.6.1	42.9	1	6	6	17	catalytic activity		metabolic process	324	34.679	5.61768
A5CNL9	CMM_0630	Putative ornithine aminotransferase	I.2.3	20.53	1	6	6	23	catalytic activity		metabolic process	414	42.9662	5.30029
A5CP14	CMM_0775	Uncharacterized protein	I.1.11	24.6	1	6	6	14	catalytic activity		metabolic process	313	32.5619	4.89404
A5CSK1	CMM_2008	Putaive rRNA methyltransferase	III.3.4	23.31	1	6	6	18	RNA binding; catalytic activity		metabolic process	266	28.2638	4.94482
A5CQW1	CMM_1420	Putative acetylornithine deacetylase	I.2.3	24.44	1	6	6	22	catalytic activity		metabolic process	405	41.8217	5.2876
A5CLX5	CMM_0041	Putative extracellular serine protease	IV.6.1	36.81	1	6	6	33	catalytic activity		metabolic process	326	34.5829	7.2251
A5CU58	CMM_2562	Branched-chain amino acid ABC transporter,permease protein	IV.1.4	16.26	1	6	6	19	transporter activity	membrane	transport	486	49.4087	8.54346
A5CSJ4	CMM_1998	Acetylornithine aminotransferase	I.2.3	25.19	1	6	6	21	catalytic activity	cytoplasm	metabolic process	405	42.9355	6.53662
A5CNH6	CMM_0588	HemY protein	I.5.7	19.42	1	6	6	17	catalytic activity		metabolic process	479	48.5037	6.37939
A5CSN3	CMM_2041	GmpB protein	I.1.1	38	1	6	6	17	catalytic activity		metabolic process	200	22.129	5.8335
A5CMY6	CMM_0400	Putative short chain dehydrogenase	V.1.3	29.55	1	6	6	23	catalytic activity		metabolic process	264	27.5463	4.94482
A5CQU1	CMM_1400	Hypothetical secreted protein	V.2.2	24.14	1	6	7	21	catalytic activity		metabolic process	435	45.952	5.13525
A5CQ08	CMM_1118	Putative Zn-dependant hydrolase	V.1.3	50	1	6	6	37	catalytic activity		metabolic process	212	22.7886	4.83057
A5CQ23	CMM_1132	Putative pyridine nucleotide-disulphide oxidoreductase	I.1.3	23.9	1	6	6	29	catalytic activity; nucleotide binding	cytoplasm	cellular homeostasis; regulation of biological process; metabolic process	477	49.1851	4.81787
A5CUA0	CMM_2604	30S ribosomal protein S8	III.3.1	45.45	1	6	6	24	RNA binding; structural molecule activity	ribosome	metabolic process	132	14.1566	9.90576
A5CPA6	CMM_0867	Putative alpha-glucoside ABC transporter,permease component	IV.1.5	21.98	1	6	6	24	transporter activity	membrane	transport	323	35.6164	9.5835
A5CRU7	CMM_1754	PTS system, fructose-specific IIA/fpr component	IV.1.20	59.87	1	6	6	35	transporter activity; catalytic activity		transport; metabolic process	152	15.6832	4.94482
A5CU54	CMM_2558	Uncharacterized protein	V.2.1	62.71	1	6	6	22	transporter activity		transport	177	18.6505	5.0083
A5CSQ5	CMM_2063	Short chain dehydrogenase/oxidoreductase	V.1.3	38.11	1	6	6	46	catalytic activity		metabolic process	265	28.1601	4.61475
A5CU79	CMM_2583	50S ribosomal protein L17	III.3.1	64.71	1	6	6	53	structural molecule activity	ribosome	metabolic process	187	20.1105	6.41748
A5CN91	CMM_0504	Putative phospholipase C	V.1.6	11.88	1	5	5	6	catalytic activity		metabolic process	724	78.2095	5.98584
A5CS35	CMM_1843	Uncharacterized protein	IV.5.5	63.33	1	5	5	24	structural molecule activity		cell organization and biogenesis; metabolic process	120	12.9262	4.44971
A5CQ56	CMM_1165	ATP synthase subunit b	IV.1.18	30.32	1	5	5	17	transporter activity; catalytic activity	membrane	metabolic process; transport	188	19.7893	4.70361
A5CQ42	CMM_1151	Uncharacterized protein	V.2.1	35.8	1	5	5	21				243	25.4203	4.67822
A5CQT7	CMM_1396	Putative thioredoxin	IV.5.2	18.56	1	5	5	25	protein binding; catalytic activity		metabolic process; cellular homeostasis; regulation of biological process	334	34.0758	4.60205
A5CR81	CMM_1539	Putative N-acetyltransferase	V.1.4	33.33	1	5	5	23	catalytic activity		metabolic process	177	19.6812	6.22705
A5CVA9	CMM_2961	30S ribosomal protein S18	III.3.1	41.38	1	5	5	25	RNA binding; structural molecule activity	ribosome	metabolic process	87	9.42831	11.6782
A5CQF3	CMM_1262	Putative sugar ABC transporter, substrate binding protein	IV.1.5	17.28	1	5	5	20	transporter activity		transport	463	49.7973	4.77979
A5CPH2	CMM_0932	Putative pyrazinamidase / nicotinamidase	I.5.4	25.51	1	5	5	21	catalytic activity		metabolic process	196	20.4601	4.76709
A5CPB6	CMM_0877	Putative L-ribulose-5-phosphate 4-epimerase	I.1.2	29.66	1	5	5	25	catalytic activity; metal ion binding		metabolic process	236	25.0307	5.57959
A5CR31	CMM_1490	50S ribosomal protein L27	III.3.1	64.29	1	5	5	41	structural molecule activity	ribosome	metabolic process	84	8.68965	11.7954
A5CUA3	CMM_2606	50S ribosomal protein L24	III.3.1	45.38	1	5	5	29	RNA binding; structural molecule activity	ribosome	metabolic process	119	12.9402	10.4038
A5CM21	CMM_0086	Putative sugar ABC transporter, binding protein	IV.1.5	16.94	1	5	5	26	transporter activity		transport	425	46.033	4.17041
A5CUU5	CMM_2798	Putative membrane bound metalloendopeptidase,family M23	IV.7.1	36.29	1	5	5	67				394	40.3236	6.96143
A5CRB4	CMM_1572	Putative two-component system, sensor kinase	IV.3.2	12.13	1	4	4	11	catalytic activity; receptor activity; signal transducer activity; nucleotide binding; protein binding		regulation of biological process; response to stimulus; metabolic process	503	51.9644	7.02002
A5CTF3	CMM_2307	Putative membrane protein	V.2.1	10.57	1	4	4	6				577	59.4945	9.30518
A5CPL5	CMM_0975	Putative ABC transporter, substrate-binding protein	IV.1.5	13.17	1	4	4	10		membrane		357	36.403	4.38623
A5CQE1	CMM_1250	Hypothetical secreted protein	V.2.2	38.67	1	4	4	20				181	17.9304	6.66846
A5CU94	CMM_2598	Protein translocase subunit SecY	IV.2.1	9.32	1	4	4	13	transporter activity	membrane	transport	440	47.9638	9.42236
A5CTJ0	CMM_2344	Putative molybdate ABC transporter, substrate-binding protein	IV.1.7	19.78	1	4	4	15	transporter activity; catalytic activity		transport	268	26.4603	4.48779
A5CRR3	CMM_1720	SerB2 protein	I.2.4	21.55	1	4	4	17	catalytic activity		metabolic process	232	24.2838	4.90674
A5CQI0	CMM_1289	Putative ABC transporter, ATP-binding protein	IV.1.1	19.45	1	4	4	20	nucleotide binding; catalytic activity		metabolic process	293	31.1371	6.1001
A5CV17	CMM_2870	Uncharacterized protein	V.2.2	30.23	1	4	4	15				215	22.8597	5.17334
A5CT96	CMM_2251	Putative amino acid permease, APC family	IV.1.11	7.92	1	4	4	12	transporter activity	membrane	transport	480	50.7683	8.85107
A5CV79	CMM_2931	Putative iron-siderophore ABC transporter,substrate-binding protein	IV.1.7	15.27	1	4	4	18				334	34.5293	4.22119
A5CUA5	CMM_2608	30S ribosomal protein S17	III.3.1	51.02	1	4	4	37	RNA binding; structural molecule activity	ribosome	metabolic process	98	11.0619	9.74463
A5CQP7	CMM_1356	Uncharacterized protein	V.2.1	33.68	1	4	4	19				190	20.9913	4.42432
A5CUQ9	CMM_2762	Uncharacterized protein	V.2.1	39.37	1	4	4	27				221	22.4081	4.83057
A5CLJ2	pCM1_0009	Uncharacterized protein	IV.2.5	16.63	1	4	4	28				415	42.9585	5.51611
A5CR02	CMM_1461	Putative stress induced DNA-binding protein	IV.5.4	26.71	1	4	4	52	DNA binding; metal ion binding; catalytic activity		cellular homeostasis; response to stimulus; metabolic process	161	17.1198	4.86865
A5CPE8	CMM_0909	Uncharacterized protein	V.2.2	30.06	1	4	4	50				316	31.0858	5.021
A5CMM5	CMM_0289	Conserved secreted protein	V.2.1	23.48	1	4	4	57				230	23.1968	4.55127
A5CU34	CMM_2538	Uncharacterized protein	V.1.4	60.54	1	4	4	41	catalytic activity		metabolic process	147	15.9959	4.4751
A5CQX9	CMM_1438	Uncharacterized protein	V.2.2	62.22	1	4	4	49				90	9.67451	4.03076
A5CRV3	CMM_1760	Glutamate synthase (NADPH), alpha subunit	I.2.2	14.18	1	15	15	36	catalytic activity		metabolic process	1523	165.388	6.03662
A5CRJ4	CMM_1650	Putative topoisomerase II subunit B	III.1.1	25.29	1	14	14	26	nucleotide binding; DNA binding; catalytic activity	chromosome	metabolic process	692	75.5422	7.86963
A5CRK5	CMM_1662	Putative 3-oxoacyl-CoA thiolase	I.4.1	49.25	1	14	14	50	catalytic activity		metabolic process	402	42.8699	6.31592
A5CTD0	CMM_2285	Putative ABC transporter, duplicated ATP-binding protein	IV.1.1	38.51	1	14	15	52	nucleotide binding; catalytic activity		metabolic process	605	65.9385	5.42725
A5CU47	CMM_2551	DNA helicase	III.1.3	19.49	1	13	13	20	nucleotide binding; DNA binding; catalytic activity		metabolic process	816	89.497	5.84619
A5CMA8	CMM_0172	Uncharacterized protein	III.2.2	33.33	1	12	12	27	RNA binding; catalytic activity; metal ion binding	cytoplasm	metabolic process	564	61.1883	6.78564
A5CU78	CMM_2582	Uncharacterized protein	IV.5.8	51.4	1	12	12	51	catalytic activity		metabolic process	356	38.6126	4.94482
A5CPK6	CMM_0966	Putative exonuclease III	III.1.6	58.72	1	12	12	33	catalytic activity		metabolic process; response to stimulus	281	31.0497	5.2749
A5CU85	CMM_2589	Mannitol-1-phosphate 5-dehydrogenase	I.1.8	46.27	1	12	12	37	catalytic activity		metabolic process	389	41.2292	4.97021
A5CQQ4	CMM_1363	Signal recognition particle protein	IV.2.4	28.11	1	11	11	32	nucleotide binding; RNA binding; catalytic activity	cytoplasm	metabolic process; cell organization and biogenesis; transport	523	55.3768	9.20264
A5CPN4	CMM_0994	Putative RNA methyltransferase	III.3.4	37.05	1	11	11	29	catalytic activity		metabolic process	421	45.7144	5.99854
A5CQX0	CMM_1429	UDP-glucose 6-dehydrogenase	I.1.9	34.1	1	11	11	26	catalytic activity; nucleotide binding		metabolic process	437	46.799	5.38916
A5CV34	CMM_2887	Putative bifunctional phytoene synthase/phytoene dehydrogenase	I.6.4	20.77	1	10	10	20	catalytic activity		metabolic process	881	94.9674	6.62451
A5CQQ2	CMM_1361	Chromosome partition protein Smc	II.1.2	11.75	1	10	10	25	nucleotide binding; DNA binding; protein binding	chromosome; cytoplasm	metabolic process; cell organization and biogenesis	1251	133.85	5.0083
A5CQT5	CMM_1394	Uncharacterized protein	V.2.1	18.61	1	9	9	25				591	66.9677	4.80518
A5CQK0	CMM_1309	Putative ABC transporter, ATP-binding protein involved in cell division	IV.1.3	28.47	1	9	9	24	nucleotide binding; catalytic activity		metabolic process; cell division	555	58.1362	6.22705
A5CRA9	CMM_1568	Putative phosphate starvation-induced ATPase	V.1.5	45.27	1	9	9	25	RNA binding; nucleotide binding			349	38.5268	5.43994
A5CTZ3	CMM_2498	Putative aminomethyltransferase	I.2.4	40.89	1	9	9	27	catalytic activity	cytoplasm	metabolic process	384	40.3482	5.5542
A5CU92	CMM_2596	Methionine aminopeptidase	III.3.4	61.51	1	9	9	36	catalytic activity; metal ion binding		metabolic process	278	29.1068	5.021
A5CUT3	CMM_2786	50S ribosomal protein L1	III.3.1	48.68	1	9	9	41	RNA binding; structural molecule activity	ribosome	metabolic process; regulation of biological process	228	23.6475	9.18799
A5CQK1	CMM_1310	Cell division protein FtsX	IV.1.3	33.11	1	8	8	20		membrane	cell division	305	33.2256	5.17334
A5CTS0	CMM_2424	Uncharacterized protein	V.2.2	30.75	1	8	8	25				322	35.752	6.72705
A5CNW8	CMM_0729	Phosphoribosylformylglycinamidine synthase subunit PurQ	I.3.1	59.31	1	8	8	27	nucleotide binding; catalytic activity	cytoplasm	metabolic process	231	24.4684	5.08447
A5CTY4	CMM_2489	Bifunctional enzyme IspD/IspF	I.4.2	32.68	1	8	8	22	catalytic activity; metal ion binding		metabolic process	410	40.8814	5.5542
A5CT74	CMM_2229	Exodeoxyribonuclease 7 large subunit	III.1.6	29.22	1	8	8	14	catalytic activity	cytoplasm	metabolic process	438	46.9906	6.97607
A5CRU0	CMM_1747	Nucleotide-binding protein CMM_1747	V.2.1	31.96	1	8	8	24	nucleotide binding; catalytic activity			291	31.5743	5.88428
A5CPL7	CMM_0977	Putative sugar ABC transporter, ATPase component	IV.1.5	18.71	1	7	7	19	nucleotide binding; catalytic activity		metabolic process	513	54.8688	5.07178
A5CR08	CMM_1467	ATP-dependent Clp protease ATP-binding subunit ClpX	IV.4.2	23.71	1	7	7	24	nucleotide binding; RNA binding; catalytic activity; metal ion binding; protein binding		metabolic process; response to stimulus	426	46.3503	5.021
A5CLV5	CMM_0023	Putative two-component system response regulator	IV.3.2	39.91	1	7	7	20	signal transducer activity; DNA binding		regulation of biological process; response to stimulus; metabolic process	228	23.5576	5.19873
A5CV90	CMM_2942	Putative 2-keto-acid dehydrogenase,dihydrolipoamide acetyltransferase E2 component	I.1.3	18.45	1	7	7	15	catalytic activity		metabolic process	466	49.185	5.07178
A5CRA7	CMM_1565	Chaperone protein DnaJ	IV.4.1	28.3	1	7	7	24	nucleotide binding; metal ion binding; protein binding	cytoplasm	metabolic process; response to stimulus	371	40.0943	6.90283
A5CRJ2	CMM_1652	Uncharacterized protein	V.2.1	24.54	1	7	7	18	catalytic activity; metal ion binding		metabolic process	379	40.3297	6.41748
A5CSP0	CMM_2048	30S ribosomal protein S15	III.3.1	65.17	1	7	7	27	RNA binding; structural molecule activity	ribosome	metabolic process	89	10.1796	9.979
A5CQ91	CMM_1199	Putative NTP pyrophosphohydrolase	III.1.9	37.22	1	7	7	24	catalytic activity; metal ion binding		metabolic process	317	33.9522	4.67822
A5CTY2	CMM_2487	Putative tRNA/rRNA methyltransferase	III.3.4	22.75	1	7	7	19	catalytic activity; RNA binding		metabolic process	356	37.5903	10.1987
A5CPQ3	CMM_1013	Glucose-1-phosphate thymidylyltransferase	II.2.9	35.89	1	7	7	25	catalytic activity; metal ion binding		metabolic process	287	31.5711	4.77979
A5CVB1	CMM_2965	Uncharacterized protein	V.2.1	12.03	1	6	6	17				765	77.2031	4.89404
A5CRZ2	CMM_1799	AroE protein	I.2.7	27.7	1	6	6	14	catalytic activity		metabolic process	296	30.5642	5.17334
A5CQ39	CMM_1148	Uncharacterized protein	IV.7.2	34.09	1	6	6	13				264	28.5586	5.66846
A5CRL1	CMM_1668	Putative ATPase	V.1.5	24.86	1	6	6	15	nucleotide binding			354	38.0084	5.60498
A5CMQ8	CMM_0322	Putative dipeptidase	I.2.10	17.41	1	6	6	16	catalytic activity		metabolic process	402	42.4968	5.87158
A5CRV2	CMM_1759	Glutamate synthase (NADPH), beta subunit	I.2.2	21.44	1	6	6	20	catalytic activity; nucleotide binding		metabolic process	485	53.1858	5.38916
A5CTJ8	CMM_2352	Uncharacterized protein	V.2.1	52.83	1	6	6	18				159	17.3044	4.48779
A5CUX5	CMM_2828	Putative phosphatase	V.1.6	51.29	1	6	6	12	catalytic activity		metabolic process	232	24.3302	4.80518
A5CRN4	CMM_1691	Putative methyltransferase	V.1.1	21.75	1	6	6	14	catalytic activity		metabolic process	354	37.6503	5.68115
A5CQE7	CMM_1256	Putative Zn-dependent alcohol dehydrogenase	V.1.3	29.68	1	6	6	14	catalytic activity; metal ion binding		metabolic process	347	35.7522	4.99561
A5CPQ2	CMM_1012	dTDP-4-dehydrorhamnose 3,5-epimerase	II.2.9	32.34	1	6	6	25	catalytic activity		metabolic process	201	22.0502	5.0083
A5CP17	CMM_0778	Putative acetolactate synthase	I.2.5	23.35	1	6	6	24	metal ion binding; catalytic activity		metabolic process	638	68.1288	5.71924
A5CLV3	CMM_0021	Uncharacterized protein	V.2.1	35.39	1	6	6	26	protein binding			243	26.1194	6.15088
A5CN79	CMM_0492	Kynureninase	I.2.7	20.77	1	6	6	21	catalytic activity	cytoplasm	metabolic process	414	44.5718	4.98291
A5CSI2	CMM_1990	Tyrosine--tRNA ligase	III.3.2	21.89	1	6	6	20	nucleotide binding; RNA binding; catalytic activity	cytoplasm	metabolic process	434	47.2342	5.2749
A5CT63	CMM_2218	Uncharacterized protein	V.2.1	53.91	1	6	6	13				230	24.0491	5.5542
A5CSW2	CMM_2117	Uncharacterized protein	V.2.1	37.16	1	6	6	33				296	31.7159	5.51611
A5CRJ9	CMM_1656	Deoxyuridine 5'-triphosphate nucleotidohydrolase	I.3.2	53.85	1	6	6	19	metal ion binding; catalytic activity		metabolic process	156	15.8212	5.85889
A5CSL3	CMM_2021	Diaminopimelate epimerase	I.2.5	27.05	1	6	6	17	catalytic activity	cytoplasm	metabolic process	292	30.5594	4.65283
A5CS12	CMM_1820	Uncharacterized protein	V.2.1	63.89	1	6	6	14	catalytic activity		metabolic process	180	19.8029	5.90967
A5CUL8	CMM_2721	Uncharacterized protein	IV.3.4	21.58	1	6	6	20	catalytic activity; protein binding		metabolic process	417	43.6451	4.89404
A5CRR5	CMM_1722	Putative 3-oxoacyl-[acyl-carrier protein] reductase	I.4.1	38.98	1	6	6	31	catalytic activity		metabolic process	236	24.2014	5.68115
A5CT97	CMM_2252	Uncharacterized protein	V.2.1	35.78	1	6	7	53				313	32.2506	5.51611
A5CUF3	CMM_2657	Uncharacterized protein	II.2.5	17.82	1	5	5	13	catalytic activity	membrane	metabolic process	505	51.8374	8.38232
A5CP64	CMM_0825	Putative cell surface protein	II.2.8	4.54	1	5	5	6	protein binding			1961	201.058	5.21143
A5CSB3	CMM_1921	Uncharacterized protein	V.2.2	39.33	1	5	5	15				239	24.9405	5.89697
A5CLS3	pCM2_0060	Uncharacterized protein	V.2.1	67.12	2	5	5	18				73	8.0701	9.18799
A5CQU3	CMM_1401	Putative glycosyl hydrolase	I.1.8	12.28	1	5	6	9	catalytic activity		metabolic process	692	75.4137	5.57959
A5CQP9	CMM_1358	Ribonuclease 3	III.2.2	28.15	1	5	5	16	RNA binding; catalytic activity; metal ion binding	cytoplasm	metabolic process	238	25.2311	5.24951
A5CQA1	CMM_1210	Putative siderophore-interacting protein	I.6.2	25.08	1	5	5	16	catalytic activity		metabolic process	299	31.3124	5.40186
A5CR10	CMM_1469	Putative methylase	V.1.1	26.22	1	5	5	11	catalytic activity	cytoplasm	metabolic process	267	28.9055	5.75732
A5CTZ4	CMM_2499	UPF0678 fatty acid-binding protein-like protein	V.2.1	54.77	1	5	5	15			transport	199	21.686	4.89404
A5CSM0	CMM_2028	Uncharacterized protein	V.2.1	32.76	1	5	5	22				174	17.4122	5.51611
A5CV61	CMM_2913	Putative oxidoreductase	V.1.3	20.41	1	5	5	17	catalytic activity; nucleotide binding	cytoplasm	metabolic process	338	35.054	4.98291
A5CUE2	CMM_2646	Uncharacterized protein	V.2.1	29.35	1	5	5	16	catalytic activity		metabolic process	184	19.8941	4.93213
A5CQ72	CMM_1181	Putative O-methyltransferase	V.1.1	40.95	1	5	5	19	catalytic activity		metabolic process	210	22.1307	5.40186
A5CNP8	CMM_0659	Adenine deaminase	I.3.1	23.42	1	5	5	17	catalytic activity; metal ion binding		metabolic process	333	36.5177	4.90674
A5CNB6	CMM_0528	Putative metal-dependent hydrolase	V.1.6	30.13	1	5	5	16	nucleotide binding; catalytic activity		metabolic process	302	31.1799	4.98291
A5CUJ6	CMM_2699	Putative sugar ABC transporter, substrate-binding protein	IV.1.5	16.19	1	5	5	24	transporter activity		transport	451	47.8812	4.58936
A5CS44	CMM_1852	Putative cell division initiation protein	II.1.1	23.72	1	5	5	20		cytoplasm	cell division	215	23.5909	4.70361
A5CUL1	CMM_2714	Uncharacterized protein	V.2.1	30.83	1	5	5	21				253	24.9614	4.79248
A5CTL5	CMM_2369	Uncharacterized protein	III.1.6	25.95	1	5	5	15	catalytic activity		metabolic process	316	34.5892	5.04639
A5CQD9	CMM_1248	Uncharacterized protein	V.2.2	26.67	1	5	5	27				300	30.4771	9.12939
A5CU81	CMM_2585	30S ribosomal protein S11	III.3.1	45.45	1	5	5	31	RNA binding; structural molecule activity	ribosome	metabolic process	132	13.9504	11.019
A5CN84	CMM_0497	Uncharacterized protein	V.2.1	20.58	1	5	5	18				311	35.1369	5.63037
A5CV40	CMM_2893	Putative short chain dehydrogenase/oxidoreductase	V.1.3	26.4	1	5	5	18	catalytic activity		metabolic process	250	25.5502	4.88135
A5CUA9	CMM_2613	30S ribosomal protein S19	III.3.1	55.91	1	5	5	22	RNA binding; structural molecule activity	ribosome	metabolic process	93	10.5637	11.2534
A5CUT9	CMM_2792	Uncharacterized protein	V.2.1	47.22	1	5	5	28	catalytic activity		metabolic process	144	14.8117	5.45264
A5CNU8	CMM_0709	Stress-induced protein, putative organic hydroperoxide resistance protein	IV.5.1	58.27	1	5	5	28			response to stimulus	139	14.451	4.86865
A5CR30	CMM_1489	50S ribosomal protein L21	III.3.1	54.9	1	5	5	45	RNA binding; structural molecule activity	ribosome	metabolic process	102	11.2242	9.84717
A5CR06	CMM_1465	ATP-dependent Clp protease proteolytic subunit	IV.4.2	27.88	1	5	5	76	catalytic activity	cytoplasm	metabolic process	226	24.5264	4.99561
A5CN94	CMM_0507	Putative lipoate-protein ligase A	I.5.10	22.92	1	5	5	38	catalytic activity		metabolic process	349	38.0974	5.23682
A5CNT3	CMM_0694	Uncharacterized protein	V.1.5	29.78	1	4	4	14	nucleotide binding; catalytic activity			178	19.5802	6.03662
A5CSV1	CMM_2106	Putative sugar ABC transporter, binding protein	IV.1.5	12.44	1	4	4	9	transporter activity		transport	450	48.5757	4.62744
A5CLN1	pCM2_0017	Uncharacterized protein	IV.2.5	51.55	1	4	4	15				161	16.5152	4.62744
A5CPD6	CMM_0897	Uncharacterized protein	II.2.5	4.74	1	4	4	15				1687	161.3	3.57373
A5CM66	CMM_0131	Uncharacterized protein	V.2.2	46.25	1	4	4	15				80	8.53187	8.98291
A5CSE4	CMM_1952	High-affinity choline/glycine/betaine transport protein, BCCT family	IV.1.15	10.67	1	4	4	5	transporter activity	membrane	transport	703	76.1704	6.0874
A5CQ86	CMM_1195	Uncharacterized protein	V.2.1	67.57	1	4	4	17				74	8.10118	5.8335
A5CUN9	CMM_2742	Putative hydrolase	V.1.6	29.58	1	4	4	14	catalytic activity		metabolic process	213	23.0047	4.66553
A5CQE9	CMM_1258	Uncharacterized protein	V.2.1	18.6	1	4	4	14				215	23.187	5.78271
A5CTT1	CMM_2435	Putative alpha-L-arabinofuranosidase	I.1.8	15.04	1	4	4	8	catalytic activity		metabolic process	512	56.7102	5.05908
A5CRY7	CMM_1794	3-dehydroquinate dehydratase	I.2.7	39.73	1	4	4	9	catalytic activity		metabolic process	146	15.7612	5.70654
A5CTQ6	CMM_2410	Putative sugar ABC transporter, substrate-binding protein	IV.1.5	12.72	1	4	4	13	transporter activity		transport	448	47.6971	4.50049
A5CTR4	CMM_2420	Putative peptide ABC transporter, substrate-binding protein	IV.1.4	15.82	1	4	4	9	transporter activity		transport	512	53.0159	4.71631
A5CUP6	CMM_2749	Uncharacterized protein	V.2.2	25.35	1	4	4	15				217	22.1723	4.4624
A5CNV1	CMM_0712	Uncharacterized protein	V.2.1	22.1	1	4	4	13				276	30.9577	5.61768
A5CSW0	CMM_2115	Hydroxyethylthiazole kinase	I.5.5	21.09	1	4	4	8	nucleotide binding; metal ion binding; catalytic activity		metabolic process	275	27.4834	5.14795
A5CQG7	CMM_1276	Uncharacterized protein	V.2.2	25.35	1	4	4	7				217	23.1595	5.2876
A5CU09	CMM_2513	Hypothetical esterase	V.1.6	30.32	1	4	4	9	catalytic activity		metabolic process	221	22.9113	4.29736
A5CT59	CMM_2214	Putative thiol-disulfide oxidoreductase	IV.5.2	42.86	1	4	4	20	antioxidant activity; catalytic activity		metabolic process	140	14.7064	4.51318
A5CTF8	CMM_2312	Putative molybdenum cofactor biosynthesis protein	I.5.9	37.5	1	4	4	18			metabolic process	184	18.3055	5.17334
A5CMU3	CMM_0357	Uncharacterized protein	V.2.1	42.11	1	4	4	19	catalytic activity		metabolic process	190	20.0823	4.84326
A5CQ40	CMM_1149	Uncharacterized protein	V.2.2	28.37	1	4	4	34				215	21.4447	4.76709
A5CLM4	pCM2_0013	Putative conjugal transfer protein, Dtr system	IV.2.5	4.36	1	4	4	19	nucleotide binding; catalytic activity		metabolic process	1492	160.589	5.80811
A5CQ25	CMM_1134	Uncharacterized protein	I.2.9	23.21	1	4	4	16	catalytic activity; metal ion binding		metabolic process	280	27.9463	4.64014
A5CQ71	CMM_1180	Uncharacterized protein	V.2.1	59.65	1	4	4	30				57	5.8821	5.94775
A5CNM0	CMM_0631	Uncharacterized protein	V.2.2	49.7	1	4	4	81				165	16.5224	6.93213
A5CNU4	CMM_0705	Uncharacterized protein	V.2.1	23.08	1	3	3	7				130	14.2511	5.90967
A5CSH7	CMM_1985	NAD kinase	I.1.7	11.48	1	3	3	6	nucleotide binding; catalytic activity; metal ion binding	cytoplasm	metabolic process	305	32.8241	5.24951
A5CLY8	CMM_0053	Putative extracellular serine protease, family S1 (Chymotrypsin)	IV.6.1	14.44	1	3	3	9	catalytic activity		metabolic process	284	30.2876	8.70459
A5CQB4	CMM_1223	Putative acetyltransferase	V.1.4	31.38	1	3	3	3	catalytic activity		metabolic process	188	19.7391	5.18604
A5CM78	CMM_0143	Uncharacterized protein	II.2.5	23.57	1	3	3	9				280	28.5506	7.97217
A5CNM1	CMM_0632	Uncharacterized protein	V.2.2	27.44	1	3	3	27				215	23.1458	10.0669
A5CPA8	CMM_0874	Ribonuclease H	III.2.2	20.63	1	3	3	9	metal ion binding; DNA binding; catalytic activity	cytoplasm	regulation of biological process; metabolic process	252	27.0253	4.729
A5CRK7	CMM_1664	Uncharacterized protein	V.2.1	19.7	1	3	3	8				198	20.8964	4.77979
A5CPM2	CMM_0982	Inosine-uridine preferring nucleoside hydrolase	I.3.1	13.83	1	3	3	10	catalytic activity		metabolic process	311	32.933	5.45264
A5CQV4	CMM_1413	Uncharacterized protein	V.2.1	18.47	1	3	3	12				222	22.1365	4.50049
A5CRI2	CMM_1639	Conserved membrane protein	V.2.1	15.68	1	3	3	13				236	25.8383	11.4292
A5CSH4	CMM_1982	Putative NTP pyrophosphatase	III.1.9	18.22	1	3	3	12	catalytic activity		metabolic process	225	24.5894	4.71631
A5CV35	CMM_2888	Putative geranylgeranyl pyrophosphate synthase	I.6.4	11.47	1	3	3	9	catalytic activity		metabolic process	340	36.1737	5.04639
A5CR38	CMM_1497	Ribosomal silencing factor RsfS	V.2.1	57.6	1	3	4	9		cytoplasm	regulation of biological process; cell organization and biogenesis	125	13.6601	4.7417
A5CR11	CMM_1470	Uncharacterized protein	V.2.2	43.68	1	3	3	12				87	9.6058	4.11963
A5CMM7	CMM_0291	Conserved membrane protein	IV.3.4	15.59	1	3	3	12				263	27.1206	4.79248
A5CRI7	CMM_1644	Uncharacterized protein	V.2.1	10.13	1	3	3	12			metabolic process	306	33.7511	4.80518
A5CS03	CMM_1811	Protein-export membrane protein SecF	IV.2.1	9.52	1	3	3	13	transporter activity	membrane	transport	336	35.6058	6.07471
A5CRN3	CMM_1690	Peptidyl-prolyl cis-trans isomerase	IV.4.4	24.21	1	3	3	14	catalytic activity		metabolic process	347	34.0803	4.729
A5CTH1	CMM_2325	Uncharacterized protein	V.2.2	11.33	1	3	3	11				353	37.7271	4.7417
A5CQC0	CMM_1229	Hypothetical membrane protein	V.2.2	8.48	1	3	3	18				495	47.7293	4.48779
A5CU14	CMM_2518	Galactose-1-phosphate uridylyltransferase	I.1.9	10.53	1	3	3	13	catalytic activity; metal ion binding		metabolic process	380	42.0052	5.49072
A5CS04	CMM_1812	Protein translocase subunit SecD	IV.2.1	12.46	1	3	3	21	transporter activity	membrane	transport	602	62.3907	5.31299
A5CP68	CMM_0829	Uncharacterized protein	II.2.8	23.72	1	3	3	16				215	21.397	4.65283
A5CT04	CMM_2159	Uncharacterized protein	V.2.2	19.7	1	3	3	18				203	19.9598	5.05908
A5CRW5	CMM_1772	Peptidyl-prolyl cis-trans isomerase	IV.4.4	27.05	1	3	3	28	catalytic activity		metabolic process	122	12.8915	4.66553
A5CV50	CMM_2902	Uncharacterized protein	V.2.2	28.47	1	3	3	51				144	15.1641	5.12256
A5CRG0	CMM_1617	Acyl carrier protein	I.4.1	30.49	1	3	3	70		cytoplasm	metabolic process	82	8.87833	3.99268
A5CR24	CMM_1483	FolC protein	I.5.6	36.83	1	14	14	34	nucleotide binding; catalytic activity		metabolic process	524	55.623	4.4624
A5CSE2	CMM_1950	Putative oxidoreductase	V.1.3	22.52	1	9	9	23	catalytic activity; nucleotide binding		metabolic process	524	57.7225	5.37646
A5CQ13	CMM_1123	Putative hexulose-6-phosphate synthase	I.1.2	51.69	1	9	9	41	catalytic activity		metabolic process	207	20.7719	4.80518
A5CPB4	CMM_0873	MetB protein	I.2.8	44.36	1	9	9	39	catalytic activity		metabolic process	390	41.3184	5.64307
A5CTX7	CMM_2482	Uncharacterized protein	IV.5.2	82.71	1	8	8	17	catalytic activity; metal ion binding		response to stimulus; metabolic process	133	15.0259	4.79248
A5CRJ0	CMM_1647	Putative UDP-N-acetylmuramyl tripeptide synthase	II.2.1	24.18	1	8	8	13	nucleotide binding; catalytic activity		metabolic process	426	44.8432	5.50342
A5CSK7	CMM_2015	Imidazole glycerol phosphate synthase subunit HisH	I.2.6	50.7	1	8	8	24	catalytic activity	cytoplasm	metabolic process	213	22.6576	5.57959
A5CSR9	CMM_2076	Uncharacterized protein	V.2.2	32.12	1	8	8	16		extracellular	transport; metabolic process	302	31.4721	5.74463
A5CSX4	CMM_2128	Thiamine pyrophosphate-requiring enzyme,putative pyruvate dehydrogenase	I.1.3	19.86	1	8	8	12	metal ion binding; catalytic activity		metabolic process	584	61.4679	5.87158
A5CSH6	CMM_1984	DNA repair protein RecN	III.1.3	24.69	1	8	8	19	nucleotide binding		metabolic process; response to stimulus	571	60.1533	4.80518
A5CRX3	CMM_1780	Guanylate kinase	I.3.1	35.43	1	8	8	19	nucleotide binding; DNA binding; catalytic activity; protein binding	cytoplasm	metabolic process; response to stimulus	302	33.2206	6.13818
A5CVB6	CMM_2968	Thioredoxin	IV.5.2	93.46	1	8	8	40	catalytic activity		metabolic process; cellular homeostasis; regulation of biological process	107	11.739	4.91943
A5CSK0	CMM_2007	Putative glutamate ABC transporter, ATP-binding protein	IV.1.4	45.42	1	8	8	43	nucleotide binding; catalytic activity		metabolic process	262	28.0875	5.37646
A5CR45	CMM_1504	Phosphoenolpyruvate-dependent fructose phosphotransferase system, EIIA, EIIB, EIIC	IV.1.20	14.31	1	7	7	23	transporter activity; catalytic activity	membrane	transport; metabolic process	685	69.0645	5.43994
A5CRH4	CMM_1631	Putative polyphosphate glucokinase	I.1.13	26.37	1	7	7	17	catalytic activity; enzyme regulator activity		metabolic process	273	28.8381	6.16357
A5CSW1	CMM_2116	Thiamine-phosphate synthase/phosphomethylpyrimidine kinase	I.5.5	18.71	1	7	7	11	catalytic activity		metabolic process	743	76.0184	5.41455
A5CRA6	CMM_1564	Heat-inducible transcription repressor HrcA	IV.3.1	31.47	1	7	7	11	DNA binding		metabolic process; regulation of biological process; response to stimulus	340	36.6133	5.26221
A5CSY9	CMM_2144	tRNA pseudouridine synthase B	III.3.4	26.33	1	7	7	11	RNA binding; catalytic activity		metabolic process	319	33.8978	5.64307
A5CTR5	CMM_2418	Putative long-chain-fatty-acid-CoA ligase	I.4.1	20.08	1	7	7	13	catalytic activity		metabolic process	528	56.8163	5.35107
A5CT90	CMM_2244	Transcription elongation factor GreA	III.2.1	54.32	1	7	7	20	DNA binding; RNA binding; protein binding		metabolic process; regulation of biological process	162	17.663	4.57666
A5CPU7	CMM_1057	Uncharacterized protein	V.2.1	57.55	1	7	7	26				212	21.5533	5.33838
A5CSR3	CMM_2071	Putative FAD/FMN-containing dehydrogenase	V.1.3	24	1	7	7	22	catalytic activity; nucleotide binding		metabolic process	475	48.8246	5.16064
A5CTM5	CMM_2379	Methylisocitrate lyase	I.1.5	39.8	1	7	7	22	catalytic activity		metabolic process	304	32.5737	4.89404
A5CRX4	CMM_1781	Orotidine 5'-phosphate decarboxylase	I.3.2	34.01	1	7	7	23	catalytic activity		metabolic process	297	29.9447	6.22705
A5CS80	CMM_1888	Putative zinc metalloprotease, family M4	IV.7.1	31.32	1	7	7	16	catalytic activity		metabolic process	348	36.9962	4.70361
A5CPX3	CMM_1083	Uncharacterized protein	I.1.11	33.68	1	6	6	10				291	32.2494	6.3667
A5CSU8	CMM_2103	Uncharacterized protein	V.2.1	23.87	1	6	7	8				486	51.0697	5.07178
A5CSC4	CMM_1932	Putative acyl-CoA synthetase	I.4.3	17.16	1	6	6	14	catalytic activity		metabolic process	571	62.5255	5.23682
A5CP36	CMM_0797	Putative ATP-dependent DNA helicase	III.1.7	13.88	1	6	6	10	nucleotide binding; catalytic activity		metabolic process; response to stimulus; cell communication	627	68.4843	5.90967
A5CT17	CMM_2172	Putative aminotransferase	I.2.5	31.83	1	6	6	14	catalytic activity		metabolic process	377	40.6039	5.69385
A5CRE3	CMM_1601	Putative glycosyltransferase	II.2.10	17.99	1	6	6	15	catalytic activity		metabolic process	428	45.6265	6.66846
A5CQK4	CMM_1313	Putative iron ABC transporter, ATPase component	IV.1.7	19.88	1	6	6	12	nucleotide binding; transporter activity; catalytic activity		metabolic process; transport	342	36.9373	5.23682
A5CRX9	CMM_1786	Aspartate carbamoyltransferase	I.3.2	21.38	1	6	6	13	catalytic activity		metabolic process	318	33.9767	7.7085
A5CUV6	CMM_2810	Putative isochorismate synthase	I.5.8	17.22	1	6	6	18	catalytic activity		metabolic process	424	43.6557	5.41455
A5CUA1	CMM_2609	50S ribosomal protein L29	III.3.1	65.74	1	6	6	18	structural molecule activity	ribosome	metabolic process	108	12.0795	7.25439
A5CRW6	CMM_1773	Ribulose-phosphate 3-epimerase	I.1.2	51.35	1	6	6	16	catalytic activity; metal ion binding		metabolic process	222	24.2753	5.13525
A5CRQ8	CMM_1715	Putative DNA polymerase III , epsilon subunit	III.1.2	34.33	1	6	6	12	catalytic activity		metabolic process	233	25.385	5.47803
A5CPK2	CMM_0962	RibC protein	I.5.3	41.74	1	6	6	12	catalytic activity		metabolic process	218	22.8247	4.7417
A5CS47	CMM_1855	Uncharacterized protein	V.2.1	38.68	1	6	6	19				243	25.6523	6.354
A5CQN1	CMM_1340	Putative serine/threonine protein phosphatase	IV.3.7	37.36	1	6	6	20	catalytic activity		metabolic process	273	28.3772	4.52588
A5CQM8	CMM_1337	Putative oxidoreductase	V.1.3	23.4	1	6	6	17	catalytic activity		metabolic process	265	27.7505	5.79541
A5CN03	CMM_0417	Uncharacterized protein	V.2.1	53.85	1	6	6	22				143	15.1444	4.53857
A5CQ90	CMM_1202	Uncharacterized protein	V.2.1	24.2	1	6	6	18				467	50.0194	4.55127
A5CSN7	CMM_2045	Uncharacterized protein	V.2.1	68.75	1	6	6	32				176	18.1119	5.19873
A5CS09	CMM_1817	Probable transcriptional regulatory protein	V.2.1	34.12	1	6	6	30	DNA binding	cytoplasm	metabolic process; regulation of biological process	255	27.4316	4.76709
A5CRF3	CMM_1611	Putative cold shock protein	IV.4.3	89.55	1	6	6	110	DNA binding	cytoplasm	metabolic process; regulation of biological process	67	7.18454	5.23682
A5CRN5	CMM_1692	Putative phosphatase	V.1.6	28.57	1	5	5	17	catalytic activity		metabolic process	231	24.6284	4.53857
A5CRG3	CMM_1620	Putative transcriptional regulator	IV.3.1	12.74	1	5	5	12				424	45.9192	6.26514
A5CV65	CMM_2917	Uncharacterized protein	V.2.1	44.86	1	5	5	20				107	12.3132	6.30322
A5CN60	CMM_0473	Putative two-component system response regulator	IV.3.2	21.05	1	5	5	12	signal transducer activity; DNA binding		regulation of biological process; response to stimulus; metabolic process	285	30.2565	4.91943
A5CQI6	CMM_1294	Glutamate racemase	II.2.1	19.39	1	5	5	8	catalytic activity		metabolic process; regulation of biological process; cell organization and biogenesis	294	30.8147	5.10986
A5CQY7	CMM_1446	Peptide methionine sulfoxide reductase MsrA	IV.5.2	48	1	5	5	17	catalytic activity		metabolic process; response to stimulus	175	19.1603	5.03369
A5CN85	CMM_0498	Uncharacterized protein	IV.7.2	24.2	1	5	5	17				281	31.4838	6.18896
A5CP08	CMM_0769	Putative integral membrane efflux protein, RND family	IV.1.9	8.63	1	5	5	11	transporter activity	membrane	transport	1089	111.527	5.09717
A5CNF0	CMM_0562	UPF0271 protein	V.2.1	19.86	1	5	5	14	catalytic activity		metabolic process	277	29.0609	5.2749
A5CV83	CMM_2936	50S ribosomal protein L33	III.3.1	67.27	1	5	5	8	structural molecule activity	ribosome	metabolic process	55	6.61062	10.7114
A5CRV5	CMM_1762	Tryptophan synthase alpha chain	I.2.7	26.67	1	5	5	13	catalytic activity		metabolic process	270	27.8304	4.80518
A5CUU6	CMM_2799	Putative inositol-1-monophosphatase	I.1.11	31.6	1	5	5	16	catalytic activity		metabolic process	269	28.1235	4.91943
A5CRB3	CMM_1571	GTPase Era	III.3.5	19.14	1	5	5	10	nucleotide binding; RNA binding; catalytic activity; transporter activity	cytoplasm; membrane	metabolic process; transport	350	37.9502	5.35107
A5CSX1	CMM_2126	Putative Zn-dependant alcohol dehydrogenase	V.1.3	15.32	1	5	5	12	metal ion binding; catalytic activity		metabolic process	346	36.3256	4.95752
A5CR70	CMM_1528	Uncharacterized protein	V.2.1	23.87	1	5	5	10				243	25.8883	4.60205
A5CPZ9	CMM_1109	Putative thioredoxin reductase	IV.5.2	20.89	1	5	5	32	antioxidant activity; catalytic activity; nucleotide binding		metabolic process	316	33.5302	5.0083
A5CU87	CMM_2591	Putative PTS system mannitol-specific IIBC component	IV.1.20	18.07	1	5	5	13	transporter activity; catalytic activity	membrane	transport; metabolic process	509	52.3048	8.51416
A5CQT0	CMM_1389	Conserved secreted protein	V.2.1	57.26	1	5	5	62				234	23.997	8.77783
A5CQ88	CMM_1197	DNA helicase	III.1.3	4.77	1	4	4	5	nucleotide binding; DNA binding; catalytic activity		metabolic process; response to stimulus	1091	117.593	5.09717
A5CT94	CMM_2249	Putative beta-glucosidase	I.1.8	14.2	1	4	4	8	catalytic activity		metabolic process	500	53.0624	6.37939
A5CSN2	CMM_2040	4-hydroxy-tetrahydrodipicolinate reductase	I.2.5	16.97	1	4	4	15	catalytic activity; nucleotide binding	cytoplasm	metabolic process	277	28.4396	5.18604
A5CNQ5	CMM_0666	Putative flavin-dependant reductase	I.1.4	36.59	1	4	4	7	nucleotide binding; catalytic activity		metabolic process	164	16.9619	5.98584
A5CUR3	CMM_2766	Putative two-component system, response regulator	IV.3.2	22.18	1	4	4	6	signal transducer activity; DNA binding		regulation of biological process; response to stimulus; metabolic process	257	28.4549	5.22412
A5CUV9	CMM_2812	2-succinyl-5-enolpyruvyl-6-hydroxy-3-cyclohexene-1-carboxylate synthase	I.5.8	11.56	1	4	4	6	catalytic activity; metal ion binding		metabolic process	588	61.3263	6.23975
A5CMP2	CMM_0306	Uncharacterized protein	V.2.1	17.85	1	4	4	6				297	31.9601	4.93213
A5CRD9	CMM_1597	Putative glycosyltransferase	II.2.10	9.55	1	4	4	7	catalytic activity		metabolic process	419	46.2079	7.23975
A5CS49	CMM_1857	Putative cell division protein	II.1.1	28.45	1	4	4	10		membrane	cell division	232	24.5092	6.90283
A5CTY7	CMM_2492	Putative two-component system response regulator	IV.3.2	12.39	1	4	4	13	signal transducer activity; DNA binding		regulation of biological process; response to stimulus; metabolic process	226	25.3984	4.86865
A5CQM9	CMM_1338	Putative transcriptional regulator, TetR family	IV.3.1	28.13	1	4	4	11	DNA binding		metabolic process; regulation of biological process	224	23.9193	5.60498
A5CTL4	CMM_2368	Ribosomal RNA small subunit methyltransferase A	III.3.4	15.79	1	4	4	8	catalytic activity; RNA binding	cytoplasm	metabolic process	304	32.1971	6.02393
A5CPX1	CMM_1081	Uncharacterized protein	V.2.2	13.47	1	4	4	7				475	47.3254	7.31299
A5CMK7	CMM_0270	Putative sugar ABC transporter, substrate binding protein	IV.1.5	16.5	1	4	4	10	transporter activity		transport	412	42.9603	4.52588
A5CRD7	CMM_1595	Peptide deformylase	III.3.4	31.91	1	4	4	12	metal ion binding; catalytic activity		metabolic process	188	20.8346	4.84326
A5CRQ0	CMM_1707	Putative esterase	V.1.6	19.77	1	4	4	10	catalytic activity		metabolic process	263	28.8758	6.17627
A5CS70	CMM_1878	Peptide deformylase	III.3.4	41.72	1	4	4	12	metal ion binding; catalytic activity		metabolic process	163	18.1374	5.03369
A5CQW0	CMM_1419	Putative short chain dehydrogenase/oxidoreductase	V.1.3	12.3	1	4	4	10	catalytic activity		metabolic process	309	32.2546	6.53662
A5CU26	CMM_2530	Uncharacterized protein	V.2.1	29.41	1	4	5	10				306	32.3617	4.86865
A5CND9	CMM_0551	Uncharacterized protein	V.2.1	53	1	4	4	15				100	10.8296	5.77002
A5CPV7	CMM_1067	Putative L-asparagine permease, APC family	IV.1.11	12.16	1	4	4	10	transporter activity	membrane	transport	510	54.5382	8.35303
A5CLI6	pCM1_0003	Putative partitioning protein, ATPase	II.1.2	30.8	1	4	4	20				224	24.4677	5.46533
A5CTZ7	CMM_2501	Transcriptional regulator	IV.3.1	30.17	1	4	4	18	signal transducer activity; DNA binding		regulation of biological process; response to stimulus	232	24.8321	6.06201
A5CTX5	CMM_2480	Uncharacterized protein	V.2.1	35.79	1	4	4	29				190	19.5039	5.32568
A5CU93	CMM_2597	Adenylate kinase	I.3.1	32	1	4	4	16	nucleotide binding; catalytic activity	cytoplasm	metabolic process	200	22.0084	4.77979
A5CVC1	CMM_2973	Ribosomal RNA small subunit methyltransferase G	III.3.4	30.81	1	4	4	16	catalytic activity	cytoplasm	metabolic process	211	22.7504	5.31299
A5CQ34	CMM_1143	Putative short chain alcohol dehydrogenase	V.1.3	20.39	1	3	3	5	catalytic activity		metabolic process	255	25.8396	5.46533
A5CLI8	pCM1_0005	Putative membrane protein	IV.2.5	6.55	1	3	3	4				733	79.6785	8.20654
A5CPJ6	CMM_0956	Putative peptide ABC transporter, substrate-binding protein	IV.1.4	7.6	1	3	3	4	transporter activity		transport	513	53.1141	4.77979
A5CU77	CMM_2581	tRNA pseudouridine synthase A	III.3.4	12.57	1	3	3	4	RNA binding; catalytic activity		metabolic process	334	35.2212	6.26514
A5CNU1	CMM_0702	Putative acetyltransferase	V.1.4	18.31	1	3	3	4	catalytic activity		metabolic process	213	22.7659	7.60596
A5CRG5	CMM_1622	Putative thiol-specific antioxidant protein	IV.5.1	19.11	1	3	3	7	catalytic activity; antioxidant activity		metabolic process	157	17.4569	5.16064
A5CN69	CMM_0482	Uncharacterized protein	V.2.2	9.7	1	3	3	14				691	69.9424	4.06885
A5CT88	CMM_2243	Uncharacterized protein	V.2.1	31.87	1	3	3	6				160	17.4387	5.18604
A5CLT1	pCM2_0068	Uncharacterized protein	V.2.2	32.43	1	3	3	5				111	12.2893	5.47803
A5CQY1	CMM_1440	Oligoribonuclease	III.2.2	12.62	1	3	3	8	catalytic activity		metabolic process	206	22.3934	4.76709
A5CR09	CMM_1468	Putative peptidyl-dipeptidase	I.2.10	7.86	1	3	3	4	catalytic activity		metabolic process	687	76.0293	4.89404
A5CLJ4	pCM1_0011	Hypothetical secreted protein	IV.2.5	19.75	1	3	3	6			metabolic process	238	24.0769	5.04639
A5CNC0	CMM_0532	Aspartate 1-decarboxylase	I.5.1	26.81	1	3	3	8	catalytic activity	cytoplasm	metabolic process	138	14.5616	5.2749
A5CS60	CMM_1868	Transcriptional regulator MraZ	II.1.1	18.18	1	3	3	6	DNA binding	cytoplasm	metabolic process; regulation of biological process	143	16.1661	5.37646
A5CN87	CMM_0500	Putative acetyltransferase	V.1.4	23.17	1	3	3	9	catalytic activity		metabolic process	164	17.2737	4.79248
A5CT03	CMM_2158	Putative serine/threonine protein kinase	IV.3.7	8.65	1	3	3	5	nucleotide binding; catalytic activity; enzyme regulator activity		metabolic process	416	42.9943	5.2876
A5CUR0	CMM_2763	Putative acetyltransferase	V.1.4	21.11	1	3	3	4	catalytic activity		metabolic process	180	19.8862	5.14795
A5CS58	CMM_1866	Uncharacterized protein	V.2.1	45.09	1	3	3	12				224	22.6619	8.6167
A5CQZ3	CMM_1452	Putative thioesterase	I.4.1	25.79	1	3	3	9				159	17.5559	5.37646
A5CT28	CMM_2183	Putative oligopeptide ABC transporter, permease component	IV.1.4	13.85	1	3	3	9	transporter activity	membrane	transport	397	42.8377	9.74463
A5CRJ7	CMM_1654	Uncharacterized protein	V.2.1	25.77	1	3	3	12				97	10.5909	4.29736
A5CSQ8	CMM_2066	Putative two-component system response regulator	IV.3.2	18.64	1	3	3	11	signal transducer activity; DNA binding		regulation of biological process; response to stimulus; metabolic process	220	23.2934	5.63037
A5CV13	CMM_2866	Uncharacterized protein	V.2.1	16.74	1	3	3	7	catalytic activity		metabolic process	239	24.7596	4.71631
A5CSL2	CMM_2020	Uncharacterized protein	III.3.4	14.9	1	3	3	12	catalytic activity	cytoplasm	metabolic process	208	22.2435	5.56689
A5CSP7	CMM_2055	Adenine phosphoribosyltransferase	I.3.1	33.71	1	3	3	14	catalytic activity	cytoplasm	metabolic process	175	17.9427	4.76709
A5CU71	CMM_2574	Alanine racemase	II.2.1	7.27	1	3	3	8	catalytic activity		metabolic process	385	39.5579	6.55127
A5CTJ5	CMM_2349	Putative Fe3+-siderophore ABC transporter,substrate-binding protein	IV.1.7	12.04	1	3	3	10				324	33.1381	4.52588
A5CQU7	CMM_1406	Putative secreted protein	V.2.1	45.7	1	3	3	11				151	15.7368	5.97314
A5CPP4	CMM_1004	N5-carboxyaminoimidazole ribonucleotide mutase	I.3.1	20.69	1	3	3	5	catalytic activity		metabolic process	174	18.0615	5.8208
A5CUB9	CMM_2623	30S ribosomal protein S12	III.3.1	35.48	1	3	3	76	RNA binding; structural molecule activity	ribosome	metabolic process	124	13.8057	11.2681
A5CT43	CMM_2198	Uncharacterized protein	V.2.1	26.49	1	3	3	17				151	15.9519	4.09424
A5CV36	CMM_2889	Isopentenyl-diphosphate Delta-isomerase	I.6.4	18.04	1	2	2	4	catalytic activity; metal ion binding	cytoplasm	metabolic process	194	21.1667	4.94482
A5CQP8	CMM_1357	50S ribosomal protein L32	III.3.1	34.33	1	2	2	16	structural molecule activity	ribosome	metabolic process	67	7.61403	10.5356
A5CQ09	CMM_1119	Putative serine protease, family S51	IV.7.3	14.29	1	2	2	6	catalytic activity		metabolic process	238	24.1534	4.27197
A5CNG1	CMM_0573	o-succinylbenzoate synthase	I.5.8	7.03	1	2	2	4	catalytic activity; metal ion binding		metabolic process	327	35.2257	5.57959
A5CNE4	CMM_0556	Putative membrane protein	V.2.2	5.69	1	2	2	4				211	21.8628	11.6636
A5CQR7	CMM_0556	Uncharacterized protein	V.2.1	19.63	1	2	2	4				107	13.2195	4.4624
A5CQF7	CMM_1266	Putative Zn-metalloprotease	IV.7.1	11.22	1	2	2	4	catalytic activity		metabolic process	303	31.1618	4.56396
A5CRN6	CMM_1693	Uncharacterized protein	V.2.1	8.15	1	2	2	2				319	34.5082	4.55127
A5CP82	CMM_0843	HptA protein	I.3.1	15.85	1	2	3	12	catalytic activity	cytoplasm	metabolic process	183	20.2555	4.93213
A5CSM3	CMM_2030	Cell division protein	II.1.1	3.58	1	2	2	2	nucleotide binding; DNA binding; catalytic activity		metabolic process; cell division	951	100.971	5.30029
A5CUR5	CMM_2768	Conserved membrane protein, putative exporter	IV.1.16	7.02	1	2	2	2				342	37.8463	8.11865
A5CTK6	CMM_2360	Conserved membrane protein	V.2.1	12.73	1	2	2	2				165	17.1719	6.80029
A5CUD8	CMM_2642	Uncharacterized protein	V.2.1	16.57	1	2	2	2				175	18.2283	4.43701
A5CRI1	CMM_1638	Putative chaperone	IV.4.1	14.11	1	2	2	2	protein binding			241	25.365	6.55127
A5CN47	CMM_0460	Uncharacterized protein	II.2.5	6.91	1	2	2	2	catalytic activity		metabolic process	564	58.8914	5.13525
A5CPZ7	CMM_1107	Uncharacterized protein	V.2.2	12.7	1	2	2	4				252	26.057	4.58936
A5CSY7	CMM_2142	Putative membrane protein	V.2.2	8.5	1	2	2	2				153	16.6791	10.1694
A5CN63	CMM_0476	Uncharacterized protein	V.2.2	19.08	1	2	2	4				131	12.9359	4.41162
A5CRQ9	CMM_1716	50S ribosomal protein L31 type B	III.3.1	45.88	1	2	2	9	structural molecule activity	ribosome	metabolic process	85	9.50576	9.0415
A5CTF6	CMM_2310	Putative glycosyl transferase	II.2.4	8.61	1	2	2	9	catalytic activity		metabolic process	244	25.9646	8.1626
A5CS05	CMM_1813	Uncharacterized protein	IV.2.1	34.65	1	2	2	6				127	13.77	4.64014
A5CS22	CMM_1830	Putative glycerol uptake facilitator protein,MIP family	IV.1.20	9.2	1	2	2	6	transporter activity	membrane	transport	250	25.2166	5.79541
A5CSJ7	CMM_2005	Putative glutamate ABC transpoter, permease component	IV.1.4	12.09	1	2	2	6	transporter activity	membrane	transport	215	22.9127	9.59814
A5CRB0	CMM_1567	Putative HIT family hydrolase	V.1.6	18.64	1	2	2	9	catalytic activity		metabolic process	118	12.4875	5.04639
A5CTW5	CMM_2470	Uncharacterized protein	V.2.1	16.29	1	2	2	12				221	23.1754	3.49756
A5CLV1	CMM_0019	Putative serine/threonine protein phosphatase	IV.3.7	8.57	1	2	2	8	catalytic activity		metabolic process	420	45.003	4.98291
A5CRC5	CMM_1583	Uncharacterized protein	V.2.1	19.5	1	2	2	8	catalytic activity		metabolic process	241	26.3022	4.81787
A5CRY5	CMM_1792	N utilization substance protein B homolog	III.2.1	18.25	1	2	2	6	RNA binding		metabolic process; regulation of biological process	137	15.0197	4.88135
A5CNW4	CMM_0725	Putative esterase	V.1.6	12.29	1	2	2	8	catalytic activity		metabolic process	236	25.0904	4.67822
A5CQ79	CMM_1188	Conserved membrane protein	V.2.1	20.72	1	2	2	10				222	23.0109	6.16357
A5CT45	CMM_2200	Putative copper resistance protein	IV.5.3	13.67	1	2	2	8	metal ion binding		response to stimulus	256	25.5266	4.50049
A5CUI9	CMM_2691	Putative endoglucanase	IV.6.3	11.11	1	2	2	6	catalytic activity		metabolic process	333	34.7705	5.31299
A5CNZ1	CMM_0752	Uncharacterized protein	V.2.2	38.89	1	2	2	11				72	7.87273	4.36084
A5CNK5	CMM_0617	Uncharacterized protein	IV.5.3	13.45	1	2	2	5	metal ion binding		response to stimulus	275	25.6048	4.84326
A5CPM4	CMM_0984	Putative phosphotransferase system mannitol/fructose-specific IIA domain	IV.1.20	22.82	1	2	2	8	transporter activity; catalytic activity		transport; metabolic process	149	15.4249	4.70361
A5CSK9	CMM_2017	Conserved membrane protein	V.2.1	23.48	1	2	2	14			metabolic process	132	13.311	5.37646
A5CQC7	CMM_1236	Uncharacterized protein	V.2.2	71.91	1	2	2	15				89	9.15909	4.29736
A5CPG0	CMM_0921	Putative endoribonuclease, putative translation initiation inhibitor	III.3.4	19.48	1	2	2	13				154	15.0219	4.66553
A5CSF2	CMM_1960	Putative peptide ABC transporter, substrate-binding protein	IV.1.4	41.82	1	13	13	52	transporter activity		transport	550	58.2893	4.53857
A5CR32	CMM_1491	GTPase Obg	III.3.5	30.47	1	11	11	31	nucleotide binding; metal ion binding; catalytic activity; transporter activity	cytoplasm	metabolic process; transport	512	54.2549	5.12256
A5CRU3	CMM_1750	UvrABC system protein B	III.1.3	22.09	1	10	11	21	nucleotide binding; DNA binding; catalytic activity; protein binding	cytoplasm	metabolic process; response to stimulus; cell communication	688	77.4397	5.2876
A5CPV4	CMM_1062	Putative alkyl hydroperoxide reductase	IV.5.1	81.76	1	10	10	38	antioxidant activity; catalytic activity		metabolic process	159	17.2007	5.37646
A5CSG5	CMM_1973	Putative acyl-CoA dehydrogenase	V.1.3	35.44	1	12	12	22	catalytic activity; nucleotide binding		metabolic process	443	47.9048	5.87158
A5CPE0	CMM_0900	DNA polymerase III gamma and tau subunit	III.1.2	25.67	1	12	12	28	nucleotide binding; DNA binding; catalytic activity		metabolic process; response to stimulus	826	84.6124	5.31299
A5CST5	CMM_2092	Heat shock protein, HSP20 family	IV.4.1	63.16	1	9	9	25			response to stimulus	152	16.6245	5.36377
A5CUU9	CMM_2802	UPF0234 protein	V.2.1	52.47	1	9	9	43				162	18.1044	5.78271
A5CTB3	CMM_2268	Transcription-repair-coupling factor	III.2.1	18.35	1	14	14	20	nucleotide binding; DNA binding; catalytic activity	cytoplasm	cell organization and biogenesis; metabolic process; response to stimulus; regulation of biological process	1210	132.88	5.5542
A5CSC3	CMM_1931	Uncharacterized protein	IV.3.1	48.2	1	9	9	17	nucleotide binding; catalytic activity		metabolic process	222	24.1263	5.59229
A5CTP8	CMM_2400	Putative O-acetylhomoserine (Thiol)-lyase	I.2.8	43.62	1	11	11	33	catalytic activity		metabolic process	431	45.5103	5.33838
A5CRJ6	CMM_1653	Uncharacterized protein	IV.3.1	31.57	1	10	11	20				396	43.2268	5.51611
A5CR51	CMM_1509	Histidinol-phosphate aminotransferase	I.2.6	24.73	1	8	8	13	catalytic activity		metabolic process	372	40.686	4.89404
A5CLY6	CMM_0051	PelA2 protein	IV.6.3	37.1	1	3	7	29	catalytic activity	extracellular	metabolic process	283	29.3698	6.94678
A5CTR1	CMM_2415	Uncharacterized protein	V.2.1	23.85	1	10	10	21	catalytic activity		metabolic process	633	65.8963	4.98291
A5CSL1	CMM_2019	GTPase HflX	III.3.5	24.95	1	9	9	16	nucleotide binding; metal ion binding; catalytic activity; transporter activity	cytoplasm	metabolic process; regulation of biological process; response to stimulus; transport	521	56.2952	5.41455
A5CPR6	CMM_1026	Putative glutaryl-CoA dehydrogenase	II.2.9	31.12	1	9	9	13	catalytic activity; nucleotide binding		metabolic process	392	42.3496	5.32568
A5CMH6	CMM_0240	Putative short-chain alcohol dehydrogenase	V.1.3	35.87	1	8	8	15	catalytic activity		metabolic process	276	29.1055	4.65283
A5CM88	CMM_0153	Chaperone, curved DNA-binding protein	IV.4.1	29.97	1	7	7	15	DNA binding; protein binding		metabolic process	337	35.3981	8.99756
A5CRY0	CMM_1787	Bifunctional protein PyrR	IV.3.1	53.61	1	7	7	12	catalytic activity		metabolic process; regulation of biological process	194	20.725	5.32568
A5CN73	CMM_0486	Uncharacterized protein	IV.4.6	89.29	1	7	7	21				56	5.865	6.04932
A5CR22	CMM_1481	Putative SAM-dependant methyltransferase	V.1.2	26.1	1	6	6	10	catalytic activity		metabolic process	249	26.3783	4.93213
A5CN56	CMM_0469	Putative oxidoreductase	V.1.3	25.83	1	6	6	16	catalytic activity		metabolic process	302	32.0969	4.57666
A5CSK3	CMM_2011	Translation initiation factor IF-3	III.3.3	41.73	1	6	6	14	RNA binding		metabolic process	139	15.8662	9.72998
A5CPP6	CMM_1006	Putative glycosyltransferase,mannosyltransferase	II.2.9	24.87	1	6	6	13	catalytic activity		metabolic process	394	41.9681	5.49072
A5CQ28	CMM_1136	Uncharacterized protein	V.2.1	37.65	1	6	6	16				247	27.3418	4.93213
A5CQK8	CMM_1317	Putative GTPase	V.1.5	26.82	1	6	6	10	nucleotide binding; catalytic activity; metal ion binding		metabolic process	358	38.4949	5.96045
A5CVA1	CMM_2953	Putative polyphosphate glucokinase	I.1.13	35.71	1	8	8	16	catalytic activity		metabolic process	294	30.693	4.95752
A5CRH3	CMM_1630	Uncharacterized protein	IV.3.1	43.03	1	8	8	13				244	27.4554	4.95752
A5CRJ1	CMM_1648	Putative glutamine amidotransferase	I.5.2	56.97	1	8	8	18	catalytic activity		metabolic process	244	25.0513	5.56689
A5CS20	CMM_1828	Putative dihydroxyacetone kinase	I.1.1	45.16	1	7	7	10	catalytic activity		metabolic process	217	21.374	4.98291
A5CPJ0	CMM_0950	Uncharacterized protein	V.2.1	57.61	1	7	7	11	catalytic activity; metal ion binding		metabolic process	184	19.5833	6.63916
A5CM01	CMM_0066	Partitioning protein	II.1.2	42.38	1	7	7	13	nucleotide binding		cell organization and biogenesis; transport	210	22.7447	5.10986
A5CVC2	CMM_2974	Putative DNA/RNA binding protein	V.1.7	44.86	1	7	7	15				185	19.7798	4.36084
A5CRW2	CMM_1769	Imidazole glycerol phosphate synthase subunit HisF	I.2.6	38.4	1	7	7	13	catalytic activity	cytoplasm	metabolic process	263	27.1079	4.77979
A5CNJ1	CMM_0603	Putative Zinc-dependant oxidoreductase	V.1.3	24.34	1	6	6	8	catalytic activity; metal ion binding		metabolic process	341	33.7108	4.83057
A5CRR9	CMM_1726	Putative ABC transporter ATP-binding protein	IV.1.1	18.05	1	6	7	12	nucleotide binding; catalytic activity		metabolic process	532	57.7489	5.64307
A5CPP9	CMM_1009	Putative dTDP-4-dehydrorhamnose reductase	II.2.9	38.73	1	6	6	9	catalytic activity		metabolic process	284	29.632	5.60498
A5CME7	CMM_0211	Putative monooxygenase	V.1.3	22.64	1	6	6	13	catalytic activity		metabolic process	349	37.7672	4.95752
A5CNG3	CMM_0575	Uncharacterized protein	V.2.2	28.34	1	6	6	10				247	28.0966	6.07471
A5CU86	CMM_2590	Putative PTS system mannitol-specific IIA component	IV.1.20	52.41	1	6	6	20	transporter activity; catalytic activity		transport; metabolic process	145	15.3398	4.33545
A5CS46	CMM_1854	Cell division protein SepF	II.1.1	46.34	1	6	6	17		cytoplasm	cell organization and biogenesis; cell division	164	17.8261	5.87158
A5CU41	CMM_2545	Phosphoribosylglycinamide formyltransferase	I.3.1	29.15	1	5	5	11	catalytic activity		metabolic process	199	21.1522	5.38916
A5CNN9	CMM_0650	Putative monooxygenase	V.1.3	27.43	1	5	5	11	catalytic activity		metabolic process	339	36.3726	5.24951
A5CQP0	CMM_1349	Thiamin-monophosphate kinase	I.5.5	27.15	1	5	5	5	catalytic activity		metabolic process	361	35.8384	4.81787
A5CSW5	CMM_2120	Putative DNA helicase	III.1.1	8.02	1	5	5	10	nucleotide binding; DNA binding; catalytic activity		metabolic process	711	77.8311	6.31592
A5CNI5	CMM_0597	HemD protein	I.5.7	23.3	1	5	5	10	catalytic activity		metabolic process	279	29.2343	5.38916
A5CTV7	CMM_2462	Uncharacterized protein	IV.3.5	45.69	1	5	5	14				116	12.7206	6.58057
A5CLP4	pCM2_0033	Putative ATPase, partitioning protein	II.1.2	18.36	1	5	5	9				256	27.4591	5.47803
A5CT60	CMM_2215	Uncharacterized protein	V.2.2	49.32	1	5	6	23			metabolic process	148	14.9314	8.08936
A5CRW7	CMM_1774	Putative rRNA cytosine-C5-methylases	III.3.4	17.84	1	7	7	9	catalytic activity; RNA binding		regulation of biological process; metabolic process	499	52.4873	6.18896
A5CSJ6	CMM_1999	Acetylglutamate kinase	I.2.3	29.7	1	7	7	21	nucleotide binding; catalytic activity	cytoplasm	metabolic process	303	31.7756	4.83057
A5CQ48	CMM_1157	Peptide chain release factor 1	III.3.3	27.86	1	7	7	17	RNA binding	cytoplasm	metabolic process; cell organization and biogenesis	359	39.8321	4.95752
A5CRC8	CMM_1586	DNA primase	III.1.1	17.65	1	7	7	16	DNA binding; catalytic activity; metal ion binding		metabolic process	629	68.3916	5.98584
A5CMP6	CMM_0310	AbfA1 protein	I.1.8	19.88	1	6	6	10	catalytic activity		metabolic process	513	55.9417	4.84326
A5CRD3	CMM_1591	Putative oligopeptide ABC transporter, ATP-binding protein	IV.1.4	41.27	1	6	6	12	nucleotide binding; catalytic activity		metabolic process	315	33.0514	6.82959
A5CVB9	CMM_2971	Putative chromosome partitioning protein	II.1.2	32.52	1	6	6	8	DNA binding			329	35.4864	5.63037
A5CQF0	CMM_1259	Putative alpha-mannosidase	I.1.8	11.31	1	6	6	12	catalytic activity; metal ion binding		metabolic process	1008	110.219	5.35107
A5CU61	CMM_2565	Putative branched-chain amino acid ABC transporter, ATPase component	IV.1.4	31.35	1	6	6	16	nucleotide binding; catalytic activity		metabolic process	252	27.2862	7.94287
A5CPH8	CMM_0938	Putative multidrug export ABC transporter, ATP-binding protein	IV.1.8	21.1	1	5	5	7	nucleotide binding; transporter activity; catalytic activity	membrane	metabolic process; transport	308	33.7477	5.50342
A5CR55	CMM_1513	Putative Zn-dependant oxidoreductase	V.1.3	23.38	1	5	5	11	metal ion binding; catalytic activity		metabolic process	325	33.0925	5.50342
A5CTG3	CMM_2317	S-methyl-5'-thioadenosine phosphorylase	I.3.1	28.1	1	5	5	6	catalytic activity		metabolic process	306	31.8214	5.22412
A5CSD8	CMM_1946	Putative oxidoreductase/monooxygenase	V.1.3	15.13	1	5	5	8	catalytic activity		metabolic process	456	50.5283	5.46533
A5CMZ5	CMM_0409	Putative oxidoreductase	V.1.3	26.16	1	5	5	10	catalytic activity		metabolic process	237	24.6086	4.89404
A5CLP1	pCM2_0030	Uncharacterized protein	V.2.2	31.98	1	5	5	9	DNA binding			222	24.0873	5.26221
A5CTY5	CMM_2490	Putative transcriptional regulator, CarD family	IV.3.1	50.63	1	5	5	11				160	17.8004	5.30029
A5CTC3	CMM_2278	Putative monooxygenase	V.1.3	29.25	1	5	5	10	catalytic activity		metabolic process	335	35.513	5.49072
A5CU69	CMM_2573	Alanine racemase	II.2.1	11.84	1	5	5	8	catalytic activity		metabolic process	566	59.3369	5.19873
A5CRS2	CMM_1729	Putative 2Fe-2S ferredoxin	IV.5.5	59.43	1	5	5	19	catalytic activity; metal ion binding		metabolic process	106	11.2005	4.60205
A5CS01	CMM_1809	GTP pyrophosphokinase	IV.3.8	10.15	1	5	5	8	catalytic activity; metal ion binding		metabolic process	749	83.2152	7.75244
A5CU39	CMM_2543	Putative dimethylarginine dimethylaminohydrolase	I.2.9	22.26	1	5	5	9	catalytic activity	cytoplasm	metabolic process	283	30.221	4.79248
A5CT58	CMM_2213	Uncharacterized protein	IV.4.6	46.98	1	5	5	9			response to stimulus	149	15.541	6.52197
A5CLM3	pCM2_0012	Uncharacterized protein	V.2.2	32.5	1	5	5	14				240	26.0212	5.18604
A5CUF8	CMM_2662	Uncharacterized protein	V.2.1	18.91	1	4	4	6	catalytic activity		metabolic process	201	21.442	4.85596
A5CV85	CMM_2937	50S ribosomal protein L28	III.3.1	33.33	1	4	4	8	structural molecule activity	ribosome	metabolic process	78	8.6518	11.0483
A5CT07	CMM_2162	Uncharacterized protein	IV.5.2	43.48	1	4	4	13			response to stimulus	161	17.3536	6.06201
A5CUS7	CMM_2780	Uncharacterized protein	V.1.6	25.15	1	4	4	10				330	34.8134	5.14795
A5CR07	CMM_1466	Putative monooxygenase	V.1.3	10.53	1	4	4	7	catalytic activity		metabolic process	380	42.5604	5.35107
A5CNG9	CMM_0581	Uncharacterized protein	IV.4.6	43.86	1	4	4	6				57	5.88092	5.40186
A5CR01	CMM_1460	Putative formamidopyrimidine-DNA glycosylase involved in DNA repair	III.1.4	21.28	1	4	4	6	DNA binding; catalytic activity; metal ion binding		metabolic process; response to stimulus	329	36.3205	7.53271
A5CP50	CMM_0811	Putative proline racemase	I.2.3	18.92	1	4	4	12	catalytic activity		metabolic process	333	35.9231	5.70654
A5CTA1	CMM_2255	Anti-sigma factor antagonist	IV.3.4	47.32	1	4	4	13	protein binding		regulation of biological process	112	11.9593	7.43018
A5CQH9	CMM_1288	Putative sugar nucleotidyltransferase	II.2.3	23.04	1	4	4	5	catalytic activity		metabolic process	230	25.356	4.80518
A5CU00	CMM_2504	Putative NTP pyrophosphohydrolase	III.1.9	20.13	1	4	4	8	catalytic activity		metabolic process	313	33.8466	6.96143
A5CV28	CMM_2880	Uncharacterized protein	V.2.1	39.16	1	4	4	8				143	15.394	8.5874
A5CMY5	CMM_0399	Uncharacterized protein	V.2.1	24.25	1	4	4	9				301	31.8768	4.81787
A5CST2	CMM_2090	Putative short chain dehydrogenase/oxidoreductase	V.1.3	26.52	1	4	4	13	catalytic activity		metabolic process	230	24.1597	6.15088
A5CNV5	CMM_0716	Putative pyruvyl-transferase	II.2.7	25.5	1	4	4	7	catalytic activity		metabolic process	349	36.6401	7.75244
A5CRH6	CMM_1633	3-methyl-2-oxobutanoate hydroxymethyltransferase	I.5.1	23.18	1	4	4	5	catalytic activity; metal ion binding	cytoplasm	metabolic process	289	30.4717	5.52881
A5CNH7	CMM_0589	Uncharacterized protein	I.5.7	57.52	1	4	4	14				113	11.657	9.99365
A5CTR6	CMM_2419	Putative ATP-dependent helicase	III.1.1	8.88	1	9	9	9	nucleotide binding; catalytic activity		metabolic process	1272	141.349	6.7417
A5CTW9	CMM_2474	Putative ATP-dependent DNA helicase	III.1.1	16.97	1	7	7	11	nucleotide binding; DNA binding; catalytic activity		metabolic process; response to stimulus	554	60.7484	5.31299
A5CPU9	CMM_1059	Histidine kinase	IV.3.2	16.97	1	7	7	10	nucleotide binding; catalytic activity; signal transducer activity		regulation of biological process; response to stimulus; metabolic process	501	54.2052	5.69385
A5CTV1	CMM_2456	Putative hydantoinase	I.3.3	16.76	1	6	6	7	catalytic activity		metabolic process	519	53.757	5.12256
A5CN67	CMM_0480	Putative beta-hydroxyacid dehydrogenase	V.1.3	43.99	1	6	6	16	catalytic activity; nucleotide binding		metabolic process	291	29.033	4.67822
A5CNJ3	CMM_0605	Putative kinase	I.5.1	31.91	1	5	5	7	catalytic activity; nucleotide binding; enzyme regulator activity		metabolic process	235	24.3715	5.24951
A5CML8	CMM_0282	Uncharacterized protein	V.2.1	7.98	1	5	5	8	catalytic activity		metabolic process	852	88.496	5.5542
A5CU67	CMM_2571	tRNA N6-adenosine threonylcarbamoyltransferase	V.1.4	13.36	1	5	5	9	catalytic activity; metal ion binding	cytoplasm	metabolic process	539	55.3988	5.10986
A5CUW4	CMM_2817	Putative mutase	I.1.1	33.6	1	5	5	12				250	26.8765	5.23682
A5CPQ7	CMM_1017	Putative membrane protein	II.2.9	10.18	1	4	4	5				737	78.5701	9.78857
A5CM94	CMM_0159	Uncharacterized protein	V.2.1	32.43	1	4	4	6	receptor activity; signal transducer activity; nucleotide binding		regulation of biological process; response to stimulus	148	16.6262	5.51611
A5CS39	CMM_1847	Transcriptional repressor NrdR	IV.3.1	33.12	1	4	4	7	nucleotide binding; DNA binding; metal ion binding		metabolic process; regulation of biological process	157	17.3008	6.02393
A5CS10	CMM_1818	Pyridoxal 5'-phosphate synthase subunit PdxT	I.5.2	28.71	1	4	4	10	catalytic activity		metabolic process	209	21.8194	5.56689
A5CQN3	CMM_1342	3-isopropylmalate dehydratase small subunit	I.2.5	32.35	1	4	4	6	catalytic activity		metabolic process	204	22.8077	5.10986
A5CQL7	CMM_1326	Putative oxidoreductase	V.1.3	18.11	1	4	4	7	catalytic activity; nucleotide binding		metabolic process	359	38.5542	5.13525
A5CP28	CMM_0789	Putative transcriptional regulator, GntR-family	IV.3.1	26.48	1	4	5	6	DNA binding		metabolic process; regulation of biological process	253	27.7516	6.41748
A5CR13	CMM_1474	Putative transcriptional regulator, Cro/CI family	IV.3.1	12.21	1	4	4	6	DNA binding			475	52.2106	7.12256
A5CMY3	CMM_0397	Putative ABC transporter, ATP-binding protein	IV.1.1	20.48	1	4	4	8	nucleotide binding; catalytic activity		metabolic process	293	32.0905	4.99561
A5CRC7	CMM_1585	Deoxyguanosinetriphosphate triphosphohydrolase-like protein	I.3.1	12.41	1	4	4	6	metal ion binding; catalytic activity		metabolic process	419	45.9641	5.70654
A5CP29	CMM_0790	Putative sugar ABC transporter ATP-binding protein	IV.1.5	19.42	1	4	4	5	nucleotide binding; catalytic activity		metabolic process	309	31.6954	5.80811
A5CNF4	CMM_0566	Putative excinuclease ABC subunit A	III.1.3	8.69	1	4	4	7	nucleotide binding; catalytic activity		metabolic process	829	87.8591	5.45264
A5CUD4	CMM_2638	Uncharacterized protein	V.2.1	42	1	4	4	6				100	11.3675	4.70361
A5CQC3	CMM_1232	Putative dioxygenase	IV.5.7	27.08	1	4	4	9	catalytic activity		metabolic process	325	34.7786	5.16064
A5CV14	CMM_2867	Putative transcriptional regulator, MarR family	IV.3.1	32.68	1	4	4	6	DNA binding		metabolic process; regulation of biological process	153	17.1843	6.81494
A5CU65	CMM_2569	Putative SAM-dependant methyltransferase	V.1.2	12.25	1	4	4	5	catalytic activity		metabolic process	400	42.318	5.56689
A5CU84	CMM_2588	Translation initiation factor IF-1	III.3.3	56.16	1	4	4	10	RNA binding	cytoplasm	metabolic process	73	8.37251	9.46631
A5CSQ3	CMM_2061	Uncharacterized protein	V.2.1	30.82	1	4	4	8				292	31.3197	4.57666
A5CMJ9	CMM_0263	D-alanine--D-alanine ligase	II.2.1	23.58	1	4	4	7	nucleotide binding; metal ion binding; catalytic activity	cytoplasm	regulation of biological process; metabolic process; cell organization and biogenesis	335	34.3772	4.93213
A5CN66	CMM_0479	Uncharacterized protein	IV.4.5	45.22	1	4	5	13				157	15.508	4.44971
A5CR33	CMM_1492	Glutamate 5-kinase	I.2.3	40.93	1	4	4	17	nucleotide binding; catalytic activity	cytoplasm	metabolic process	259	26.695	5.43994
A5CRT3	CMM_1740	RNA polymerase-binding protein RbpA	V.2.1	54.1	1	4	4	12	protein binding		metabolic process; regulation of biological process	122	13.2898	6.80029
A5CN01	CMM_0415	Organic hydroperoxide resistance protein	IV.5.1	54.29	1	4	4	29			response to stimulus	140	14.3151	4.90674
A5CU22	CMM_2526	Putative MFS permease	IV.1.9	8.4	1	3	3	8			transport	488	51.2261	12.0298
A5CRX2	CMM_1779	DNA-directed RNA polymerase subunit omega	III.2.1	40.45	1	3	3	6	DNA binding; catalytic activity		metabolic process	89	9.763	4.62744
A5CM33	CMM_0098	Putative LacI-family transcriptional regulator	IV.3.1	13.73	1	3	3	10	DNA binding		metabolic process; regulation of biological process	335	35.4336	5.77002
A5CP09	CMM_0770	Putative ATP-dependent RNA helicase	III.1.9	14.39	1	3	3	3	nucleotide binding; catalytic activity		metabolic process	403	43.4534	8.60205
A5CQ31	CMM_1140	Putative pyridoxamine-phosphate oxidase	I.5.2	23.14	1	3	3	5	catalytic activity; nucleotide binding		metabolic process	229	25.1966	4.83057
A5CN95	CMM_0508	Putative acetyltransferase	V.1.4	41.49	1	3	3	5	catalytic activity		metabolic process	94	10.4372	4.94482
A5CUJ1	CMM_2694	Uncharacterized protein	V.2.1	10.43	1	3	3	3				345	38.6427	5.10986
A5CQE3	CMM_1252	Putative choline/glycine/betaine transporter,BCCT family	IV.1.15	6.57	1	3	3	5	transporter activity	membrane	transport	609	65.8064	6.40479
A5CM87	CMM_0152	Protein GrpE	IV.4.1	16.59	1	3	3	3	enzyme regulator activity; nucleotide binding; protein binding	cytoplasm	metabolic process; response to stimulus; regulation of biological process	217	23.2295	4.37354
A5CQ24	CMM_1133	Putative enoyl-CoA hydratase	I.4.1	19.35	1	3	3	5	catalytic activity		metabolic process	279	29.1652	5.92236
A5CLS8	pCM2_0065	Uncharacterized protein	V.2.2	50.72	1	3	3	5				69	7.49387	7.25439
A5CQI8	CMM_1296	Non-canonical purine NTP pyrophosphatase	I.3.1	30.2	1	3	3	3	nucleotide binding; catalytic activity; metal ion binding		metabolic process	202	21.3049	5.07178
A5CRD5	CMM_1593	Uncharacterized protein	V.2.1	10.45	1	3	3	8	protein binding			335	33.3439	5.40186
A5CLU6	CMM_0014	Para-aminobenzoate synthetase component II	I.5.6	21.23	1	3	3	5	catalytic activity		metabolic process	212	22.2352	4.95752
A5CSH0	CMM_1978	Uncharacterized protein	V.2.1	18.23	1	3	3	5		cytoplasm	cell division	203	21.7043	4.81787
A5CQQ1	CMM_1360	Putative acetyltransferase	V.1.4	13.44	1	3	3	8	catalytic activity		metabolic process	372	40.2114	5.98584
A5CLM1	pCM2_0010	Uncharacterized protein	V.2.2	15.97	1	3	3	8				144	15.1447	4.85596
A5CSN0	CMM_2038	Putative nucleoside-diphosphate sugar epimerase	I.1.12	15.03	1	3	3	5	catalytic activity		metabolic process	306	32.3752	6.81494
A5CR14	CMM_1471	Putative acetyltransferase, GNAT family	V.1.4	28	1	3	3	3	catalytic activity		metabolic process	150	16.7464	5.08447
A5CU60	CMM_2564	Putatice branched-chain amino acid ABC transporter, ATPase component	IV.1.4	10.1	1	3	3	3	nucleotide binding; catalytic activity		metabolic process	307	33.205	5.56689
A5CNX9	CMM_0740	Putative acyltransferase	I.4.3	16.58	1	3	3	3	catalytic activity	cytosol	metabolic process	199	20.7945	6.06201
A5CQZ7	CMM_1456	Conserved membrane protein	IV.1.19	12.53	1	3	3	7		membrane	transport	439	46.5136	5.96045
A5CVC3	CMM_2975	Uncharacterized protein	V.2.1	14.06	1	3	3	3		membrane		320	35.6611	10.1694
A5CPX2	CMM_1082	Uncharacterized protein	IV.5.6	51	1	3	3	11				100	10.6504	4.52588
A5CSP6	CMM_2054	5-methyltetrahydropteroyltriglutamate-homocysteine methyltransferase	I.2.8	9.31	1	3	3	5	catalytic activity; metal ion binding		metabolic process	419	45.6188	5.08447
A5CS89	CMM_1897	NTP pyrophosphohydrolase	III.1.9	14.78	1	3	3	5	catalytic activity		metabolic process	318	33.1331	5.5542
A5CSX5	CMM_2129	Uncharacterized protein	V.2.1	16.46	1	3	3	3				243	26.8973	4.60205
A5CSG7	CMM_1975	Cytidylate kinase	I.3.2	13.64	1	3	3	6	nucleotide binding; catalytic activity	cytoplasm	metabolic process	242	25.6918	4.60205
A5CNS7	CMM_0688	Uncharacterized protein	V.2.1	13.92	1	3	3	3				158	16.8795	5.51611
A5CNZ8	CMM_0759	Uncharacterized protein	V.2.1	71.01	1	3	3	7				69	7.86384	5.45264
A5CPQ5	CMM_1015	Putative glycosyl transferase	II.2.9	14.87	1	3	3	4	catalytic activity		metabolic process	343	36.9402	6.62451
A5CSI3	CMM_1991	Uncharacterized protein	V.2.1	17.45	1	3	3	6				235	24.2987	8.82178
A5CNA7	CMM_0520	Uncharacterized protein	V.2.1	15.95	1	3	3	9				232	25.6876	4.77979
A5CV82	CMM_2934	Putative DNA-binding protein Hu	IV.3.5	29.47	1	3	3	16	DNA binding			95	9.67318	9.77393
A5CS02	CMM_1810	Uncharacterized protein	V.2.1	48.74	1	2	3	5				119	12.446	5.04639
A5CNC2	CMM_0534	Deoxyribodipyrimidine photo-lyase	III.1.3	12.2	1	6	6	11	catalytic activity		metabolic process; response to stimulus	508	56.7934	5.07178
A5CQ87	CMM_1196	DNA helicase	III.1.1	7.25	1	5	5	9	nucleotide binding; DNA binding; catalytic activity		metabolic process	1089	115.639	5.31299
A5CQ10	CMM_1120	Uracil-DNA glycosylase	III.1.4	32.89	1	5	5	8	catalytic activity	cytoplasm	metabolic process; response to stimulus	228	24.2599	7.04932
A5CSP4	CMM_2052	DNA helicase	III.1.1	11.08	1	5	5	11	nucleotide binding; DNA binding; catalytic activity		metabolic process	758	82.5188	5.37646
A5CM32	CMM_0097	Putative beta-glucosidase, glycosyl hydrolase family 3	I.1.8	10.53	1	5	6	12	catalytic activity		metabolic process	874	92.6846	4.95752
A5CVA3	CMM_2955	Putative glycosyl transferase	II.2.4	15.93	1	4	4	5	catalytic activity		metabolic process	408	42.0674	6.46826
A5CQW4	CMM_1423	Putative sulfite oxidase	I.2.8	30.39	1	4	4	5			metabolic process	204	23.0236	6.53662
A5CUU0	CMM_2793	UPF0336 protein	V.2.1	60.4	1	4	4	10				149	15.4009	5.42725
A5CRU4	CMM_1751	Dephospho-CoA kinase	I.5.1	33.82	1	4	4	7	nucleotide binding; catalytic activity	cytoplasm	metabolic process	204	21.5434	4.90674
A5CPT9	CMM_1049	Putative two-component system response regulator	IV.3.2	22.57	1	4	4	7	signal transducer activity; DNA binding		regulation of biological process; response to stimulus; metabolic process	226	24.6769	5.14795
A5CPZ2	CMM_1102	Putative efflux MFS permease	IV.1.9	10.14	1	4	4	9	transporter activity		transport	513	52.1648	9.74463
A5CT00	CMM_2155	Putative 3-oxoacyl-[acyl-carrier-protein] synthase	I.4.1	22.16	1	4	4	5	catalytic activity		metabolic process	343	36.7178	6.01123
A5CUS6	CMM_2779	Putative carboxylesterase	V.1.6	11.66	1	4	4	6				403	41.9466	5.40186
A5CR44	CMM_1503	Putative 1-phosphofructokinase	IV.1.20	26.32	1	4	4	7	nucleotide binding; catalytic activity		metabolic process	323	32.8753	5.2749
A5CPK4	CMM_0964	Putative hydrolase	V.1.6	19.29	1	4	4	9	catalytic activity		metabolic process	254	26.5183	4.729
A5CRX1	CMM_1778	Putative DNA/pantothenate metabolism flavoprotein OS=Clavibacter michiganensis subsp. michiganensis (strain NCPPB 382) GN=dfpA PE=4 SV=1 - [A5CRX1_CLAM3]	I.5.1	12.35	1	4	4	6	catalytic activity; nucleotide binding		metabolic process	405	41.6511	6.37939
A5CM68	CMM_0133	Pyrrolidone-carboxylate peptidase	IV.7.4	29.58	1	4	4	6	catalytic activity	cytoplasm; cytosol	metabolic process	213	22.7965	4.66553
A5CSG8	CMM_1976	Putative prephenate dehydrogenase	I.2.7	20.95	1	4	4	7	catalytic activity		metabolic process	358	36.9776	5.2749
A5CMF5	CMM_0219	Uncharacterized protein	I.2.8	67.68	1	4	4	7				99	10.1961	4.70361
A5CQA0	CMM_1209	Octanoyltransferase	I.5.10	18.45	1	3	3	6	catalytic activity	cytoplasm	metabolic process	233	24.767	7.12256
A5CSM1	CMM_2031	Putative ABC transporter, permease component	IV.1.1	12.2	1	3	3	4		membrane		410	42.8466	5.04639
A5CRA8	CMM_1566	Ribosomal RNA small subunit methyltransferase E	III.3.4	14.68	1	3	3	4	catalytic activity	cytoplasm	metabolic process	252	26.2422	6.82959
A5CRE5	CMM_1603	Putative pyruvyltransferase	II.2.10	13.5	1	3	3	5	catalytic activity		metabolic process	311	34.594	6.66846
A5CLK9	pCM1_0026	Uncharacterized protein	V.2.1	27.78	1	3	3	5				90	10.3843	5.79541
A5CLJ1	pCM1_0008	Uncharacterized protein	IV.3.1	38	1	3	3	4			regulation of biological process	100	11.3789	7.1958
A5CS38	CMM_1846	Dihydroorotate dehydrogenase (quinone)	I.3.2	13.08	1	3	3	4	catalytic activity	membrane	metabolic process	344	36.3956	9.5249
A5CV12	CMM_2865	Endonuclease NucS	V.2.1	15.58	1	3	3	4	DNA binding; catalytic activity	cytoplasm	metabolic process	231	25.4631	5.90967
A5CTW6	CMM_2471	Putative cold shock protein	IV.4.3	46.46	1	3	3	7	DNA binding	cytoplasm	regulation of biological process	127	13.5011	7.41553
A5CUM1	CMM_2724	Anti-sigma factor antagonist	IV.3.4	41.07	1	3	3	11	protein binding		regulation of biological process	112	11.601	4.80518
A5CUY6	CMM_2839	Uncharacterized protein	V.2.1	15.92	1	3	3	4				289	30.5225	4.7417
A5CPN3	CMM_0993	Maf-like protein	II.1.1	17.49	1	3	3	5		cytoplasm		223	23.4124	5.42725
A5CQZ5	CMM_1454	Uncharacterized protein	V.2.1	16.88	1	3	3	7				231	23.6505	5.42725
A5CMH8	CMM_0242	Methylated-DNA--protein-cysteine methyltransferase	III.1.5	18.27	1	3	3	7	catalytic activity	cytoplasm	metabolic process; response to stimulus	208	22.5609	7.31299
A5CS51	CMM_1859	UDP-N-acetylglucosamine--N-acetylmuramyl-(pentapeptide) pyrophosphoryl-undecaprenol N-acetylglucosamine transferase	II.2.1	16.35	1	3	3	5	catalytic activity	membrane	metabolic process; regulation of biological process; cell division; cell organization and biogenesis	367	37.6912	10.1108
A5CTF7	CMM_2311	Molybdopterin cofactor biosynthesis protein	I.5.9	27.27	1	3	3	5			metabolic process	143	15.3308	5.5415
A5CM02	CMM_0067	Putative ATPase	V.1.5	9.77	1	3	3	4	nucleotide binding; catalytic activity		metabolic process	389	42.0347	5.43994
A5CNN0	CMM_0641	Uncharacterized protein	V.2.2	44.87	1	3	3	4				78	9.02651	4.51318
A5CPC7	CMM_0888	Uncharacterized protein	I.2.8	14.53	1	3	3	4	catalytic activity		metabolic process	351	36.5086	5.38916
A5CT13	CMM_2168	MoxR-like ATPase, putative regulator	IV.3.6	15.85	1	3	3	8	DNA binding; nucleotide binding; protein binding; catalytic activity		metabolic process; regulation of biological process	347	36.701	6.01123
A5CQI7	CMM_1295	Ribonuclease PH	III.2.2	19.18	1	3	3	9	RNA binding; catalytic activity		metabolic process	245	26.2464	5.38916
A5CNP7	CMM_0658	Putative endoribonuclease L-PSP	III.3.4	32.95	1	3	3	6				173	17.8312	4.85596
A5CUG9	CMM_2672	Putative antibiotic immunity protein, peptidase family S66	IV.7.3	16.13	1	3	3	6				372	39.9846	6.25244
A5CP33	CMM_0794	Putative sugar epimerase	I.1.12	12.79	1	3	3	4	catalytic activity		metabolic process	305	32.1672	4.70361
A5CU05	CMM_2509	Uncharacterized protein	IV.3.4	17.77	1	3	3	15		membrane		287	28.9336	4.41162
A5CPG8	CMM_0928	Thymidylate kinase	I.3.3	16.11	1	3	3	4	nucleotide binding; catalytic activity		metabolic process	211	22.8701	5.65576
A5CSI1	CMM_1989	Uncharacterized protein	V.2.1	13.5	1	3	3	5	protein binding			326	35.0327	4.28467
A5CN36	CMM_0450	Uncharacterized protein	V.1.3	22.01	1	3	3	8	catalytic activity		metabolic process	209	21.8614	6.354
A5CP81	CMM_0842	tRNA(Ile)-lysidine synthase	II.1.2	13.78	1	3	3	6	nucleotide binding; catalytic activity	cytoplasm	metabolic process	341	35.2997	6.06201
A5CRY6	CMM_1793	Elongation factor P	III.3.3	32.09	1	3	3	16	RNA binding	cytoplasm	metabolic process	187	20.4563	5.10986
A5CPE6	CMM_0907	Thymidine kinase	I.3.2	18.75	1	3	3	7	nucleotide binding; catalytic activity		metabolic process	224	24.6985	5.33838
A5CV70	CMM_2921	Uncharacterized protein	V.2.1	25.32	1	3	3	10				237	23.6533	4.22119
A5CVC0	CMM_2972	Putative chromosome partitioning protein	II.1.2	22.87	1	3	3	6	nucleotide binding; catalytic activity		metabolic process	293	31.7015	5.35107
A5CNF5	CMM_0567	RNA polymerase sigma factor	IV.3.4	21.61	1	2	3	7	DNA binding		metabolic process; regulation of biological process	347	38.7141	5.35107
A5CUZ3	CMM_2846	Putative plasmid maintenance system, antidote protein	II.1.2	7.08	1	2	2	2	DNA binding			367	40.4338	6.37939
A5CSX8	CMM_2133	Putative lipase/esterase	V.1.6	9.43	1	2	2	2	catalytic activity		metabolic process	212	22.0042	4.91943
A5CNQ7	CMM_0668	Uncharacterized protein	V.2.1	16.02	1	2	2	2	catalytic activity; metal ion binding		metabolic process	206	22.0443	5.40186
A5CQP1	CMM_1350	Putative DNA methylase	III.1.5	11.82	1	2	2	2	catalytic activity		metabolic process	203	21.321	5.19873
A5CTN7	CMM_2391	Ribosomal RNA small subunit methyltransferase I	V.1.1	10.7	1	2	2	2	catalytic activity	cytoplasm	metabolic process	271	28.8824	5.42725
A5CM96	CMM_0161	Putative transcriptional regulator, LacI-family	IV.3.1	11.11	1	2	2	4	DNA binding		metabolic process; regulation of biological process	342	35.2865	7.62061
A5CPL2	CMM_0972	Succinate dehydrogenase, cytochrome b subunit	I.1.3	15.28	1	2	2	4	catalytic activity		metabolic process	144	16.1347	10.4038
A5CRZ4	CMM_1801	Putative Holliday junction resolvase	III.1.7	14.29	1	2	2	4	catalytic activity	cytoplasm	metabolic process; response to stimulus	161	16.8331	9.0415
A5CRU9	CMM_1756	Uncharacterized protein	V.2.1	17.36	1	2	2	4				144	15.1697	7.04932
A5CQQ7	CMM_1366	Putative glutamate--cysteine ligase 2	I.2.10	6.01	1	2	2	2	nucleotide binding; catalytic activity		metabolic process	383	42.2822	5.14795
A5CPW2	CMM_1072	Putative hydrolase/acyltransferase	V.1.6	8.82	1	2	2	4	catalytic activity		metabolic process	272	28.4326	6.52197
A5CNZ4	CMM_0755	Uncharacterized protein	V.2.1	25.4	1	2	2	2				126	13.0108	6.53662
A5CRB8	CMM_1579	Isoprenyl transferase	II.2.2	16.32	1	2	2	2	metal ion binding; catalytic activity		metabolic process	288	32.4882	5.74463
A5CPL8	CMM_0978	Putative sugar ABC transporter, permease component	IV.1.5	4.8	1	2	2	2	transporter activity	membrane	transport	458	46.83	9.17334
A5CSK4	CMM_2012	Uncharacterized protein	V.2.1	33.54	1	2	2	2				161	16.432	4.57666
A5CR39	CMM_1498	Uncharacterized protein	V.2.1	27.54	1	2	2	2				138	15.3232	5.21143
A5CS07	CMM_1815	Holliday junction ATP-dependent DNA helicase RuvA	III.1.7	10.75	1	2	2	4	nucleotide binding; DNA binding; catalytic activity		metabolic process; response to stimulus; cell communication	214	21.9136	5.90967
A5CQ15	CMM_1127	Putative Asp/Glu-tRNA amidotransferase	III.3.4	5.26	1	2	2	2	catalytic activity		metabolic process	475	50.7682	5.24951
A5CP91	CMM_0852	Uncharacterized protein	V.2.1	9.49	1	2	2	2				253	25.3384	4.89404
A5CQ55	CMM_1163	ATP synthase subunit a	IV.1.18	7.09	1	2	2	4	transporter activity; catalytic activity	membrane	metabolic process; transport	282	30.798	6.94678
A5CNW9	CMM_0730	Putative Phosphoribosylformylglycinamidine (FGAM) synthase	I.3.1	13.08	1	2	2	2	nucleotide binding; catalytic activity	cytoplasm	metabolic process	130	13.3517	4.61475
A5CP87	CMM_0848	2-amino-4-hydroxy-6-hydroxymethyldihydropteridine pyrophosphokinase/dihydroneopterin aldolase	I.5.6	10.47	1	2	2	2	catalytic activity		metabolic process	296	31.2806	5.021
A5CRM8	CMM_1687	Sec-independent protein translocase protein TatA	IV.2.2	11.4	1	2	2	2	transporter activity	membrane	transport	114	13.0306	7.26904
A5CS91	CMM_1899	Putative Zinc-dependant dehydrogenase	V.1.3	10.06	1	2	2	2	metal ion binding; catalytic activity		metabolic process	338	35.5972	5.66846
A5CQL2	CMM_1321	Putative acetyl transferase	V.1.4	13.01	1	2	2	4	catalytic activity		metabolic process	146	15.8902	6.37939
A5CRN2	CMM_1689	Putative transcriptional regulator	IV.3.1	8.66	1	2	2	2				335	37.2225	6.68311
A5CUC9	CMM_2633	Uncharacterized protein	V.2.1	13.33	1	2	2	2				285	30.5279	6.75635
A5CTS3	CMM_2427	Putative acetyltransferase	V.1.4	5.65	1	2	2	2	catalytic activity		metabolic process	177	19.4639	5.31299
A5CU37	CMM_2541	Putative ABC transporter, fused permease and ATP-binding protein	IV.1.8	4.82	1	2	2	2	nucleotide binding; catalytic activity; transporter activity		metabolic process; transport	602	65.1949	7.32764
A5CQI2	CMM_1291	Uncharacterized protein	V.2.1	21.05	1	2	2	4				95	10.6434	5.2749
A5CLV2	CMM_0020	Uncharacterized protein	V.2.1	21.13	1	2	2	2	protein binding			194	20.808	9.59814
A5CVA5	CMM_2957	Peptide chain release factor 3	III.3.3	5.73	1	2	2	2	nucleotide binding; catalytic activity; RNA binding	cytoplasm	metabolic process; cell organization and biogenesis; regulation of biological process	541	59.0831	6.20166
A5CRF1	CMM_1609	Putative undecaprenyl-phosphate glycosyl-1-phosphate transfe	II.2.10	5.57	1	2	2	2	catalytic activity		metabolic process	521	57.6621	9.74463
A5CRM1	CMM_1678	Putative mutT-like protein	III.1.9	23.72	1	2	2	2	catalytic activity		metabolic process	156	17.7709	4.67822
A5CT02	CMM_2157	Putative zinc metalloprotease, family M50	IV.7.1	6.36	1	2	2	2	catalytic activity; protein binding; metal ion binding	membrane	metabolic process	472	48.4394	5.33838
A5CQV5	CMM_1414	Putative acyl-CoA synthatase	I.4.1	5.52	1	2	2	2	catalytic activity		metabolic process	562	60.3778	5.45264
A5CPG9	CMM_0929	DNA polymerase III, delta' subunit	III.1.2	6.76	1	2	2	2	catalytic activity; nucleotide binding		metabolic process	414	43.9261	6.82959
A5CQM0	CMM_1329	Uncharacterized protein	V.2.1	37.14	1	2	2	2				105	10.9776	4.66553
A5CQ98	CMM_1207	Putative transcriptional regulator, PadR family	IV.3.1	11.05	1	2	2	6				190	20.1562	6.0874
A5CQV1	CMM_1410	Putative ABC transporter ATP-binding protein	IV.1.1	3.49	1	2	2	2	nucleotide binding; catalytic activity		metabolic process	545	58.2082	5.2749
A5CU16	CMM_2520	Putative acetyltransferase/ siderophore binding protein	V.1.4	16.92	1	2	2	4	catalytic activity		metabolic process	201	20.4056	5.33838
A5CR94	CMM_1552	Putative NUDIX hydrolase	III.1.9	13.37	1	2	2	8	catalytic activity		metabolic process	172	18.6755	4.57666
A5CUZ5	CMM_2848	Putative short chain dehydrogenase/oxidoreductase	V.1.3	12.4	1	2	2	2	catalytic activity		metabolic process	250	25.3809	5.03369
A5CPH7	CMM_0937	Putative multidrug export ABC transporter, fused permease and ATP-binding protein	IV.1.8	6.38	1	2	2	4	nucleotide binding; catalytic activity; transporter activity		metabolic process; transport	643	67.4595	5.57959
A5CQG6	CMM_1275	Putative aminotransferase	I.2.1	7.48	1	2	2	2	catalytic activity		metabolic process	401	42.4004	5.56689
A5CT93	CMM_2248	Uncharacterized protein	V.2.1	13.83	1	2	2	4				188	20.965	5.37646
A5CVA7	CMM_2959	Putative replicative DNA helicase	III.1.1	4.58	1	2	2	4	DNA binding; catalytic activity; nucleotide binding		metabolic process	459	49.6146	5.56689
A5CTY1	CMM_2486	Uncharacterized protein	V.2.1	5.53	1	2	2	2	nucleotide binding; catalytic activity	membrane	metabolic process	434	49.1514	5.05908
A5CVA2	CMM_2954	Putative glycerate kinase	I.1.5	8.63	1	2	2	2	catalytic activity		metabolic process	371	36.2401	5.41455
A5CTJ1	CMM_2345	Putative transcriptional regulator involved in molybdate uptake	IV.3.1	21.76	1	2	2	4	transporter activity; nucleotide binding; catalytic activity		transport	170	17.4582	5.65576
A5CMF9	CMM_0223	Putative phosphatase	V.1.6	12.33	1	2	2	4	catalytic activity		metabolic process	219	22.709	5.0083
A5CQU8	CMM_1407	Aspartyl/glutamyl-tRNA(Asn/Gln) amidotransferase subunit C	III.3.2	16.39	1	2	2	5	nucleotide binding; catalytic activity		metabolic process; regulation of biological process	122	12.8365	4.50049
A5CQ65	CMM_1174	Transcriptional regulatory protein, AsnC family	IV.3.1	18.24	1	2	2	6	DNA binding		metabolic process; regulation of biological process	159	17.159	5.21143
A5CQZ4	CMM_1453	Putative acyl-CoA thioesterase II	I.4.1	9.63	1	2	2	2	catalytic activity		metabolic process	301	33.1824	6.22705
A5CPB2	CMM_0871	Uncharacterized protein	V.2.1	15.79	1	2	2	3				247	26.5153	5.69385
A5CSQ6	CMM_2064	Uncharacterized protein	V.2.1	62.32	1	2	2	8				69	7.47272	8.44092
A5CQ51	CMM_1160	Uncharacterized protein	V.2.1	13.27	1	2	2	4	RNA binding			309	31.628	4.37354

## Sheet: Table S2. XMM only
Accession	Gene Name	Description	COG	ΣCoverage	Σ# Proteins	Σ# Unique Peptides	Σ# Peptides	Σ# PSMs	Molecular Function	Cellular Component	Biological Process	# AAs	MW [kDa]	calc. pI
A5CMT3	CMM_0347	Putative alpha-mannosidase OS=Clavibacter michiganensis subsp. michiganensis (strain NCPPB 382) GN=manX PE=4 SV=1 - [A5CMT3_CLAM3]	I.1.8	11.78	1	7	7	10	catalytic activity; metal ion binding		metabolic process	1061	117.049	5.42725
A5CM23	CMM_0088	Beta-glucosidase OS=Clavibacter michiganensis subsp. michiganensis (strain NCPPB 382) GN=bglA PE=3 SV=1 - [A5CM23_CLAM3]	I.1.8	12.47	1	4	4	6	catalytic activity		metabolic process	481	52.7871	5.10986
A5CTY9	CMM_2494	Phosphate-specific transport system accessory protein PhoU OS=Clavibacter michiganensis subsp. michiganensis (strain NCPPB 382) GN=phoU PE=3 SV=1 - [A5CTY9_CLAM3]	IV.3.1	20.28	1	4	4	6		cytoplasm	transport; cellular homeostasis; regulation of biological process	217	24.4298	4.91943
A5CSU6	CMM_2101	Uncharacterized protein OS=Clavibacter michiganensis subsp. michiganensis (strain NCPPB 382) GN=CMM_2101 PE=4 SV=1 - [A5CSU6_CLAM3]	V.2.2	35.92	1	3	3	9				245	25.3968	7.53271
A5CSK8	CMM_2016	Imidazoleglycerol-phosphate dehydratase OS=Clavibacter michiganensis subsp. michiganensis (strain NCPPB 382) GN=hisB PE=3 SV=1 - [HIS7_CLAM3]	I.2.6	20.79	1	3	3	4	catalytic activity	cytoplasm	metabolic process	202	21.6401	6.29053
A5CRQ5	CMM_1712	Putative glycosyltransferase, family 1 OS=Clavibacter michiganensis subsp. michiganensis (strain NCPPB 382) GN=CMM_1712 PE=4 SV=1 - [A5CRQ5_CLAM3]	II.2.4	11.54	1	3	3	7	catalytic activity		metabolic process	364	40.595	7.07861
A5CTQ1	CMM_2405	Putative L-serine dehydratase OS=Clavibacter michiganensis subsp. michiganensis (strain NCPPB 382) GN=sdaA PE=4 SV=1 - [A5CTQ1_CLAM3]	I.2.4	9.45	1	3	3	5	catalytic activity		metabolic process	455	46.7165	5.2876
A5CSA3	CMM_1911	Uncharacterized protein OS=Clavibacter michiganensis subsp. michiganensis (strain NCPPB 382) GN=CMM_1911 PE=4 SV=1 - [A5CSA3_CLAM3]	V.1.3	17.16	1	3	3	6	catalytic activity; nucleotide binding		metabolic process	303	31.1082	5.65576
A5CP35	CMM_0796	Putative thioredoxin OS=Clavibacter michiganensis subsp. michiganensis (strain NCPPB 382) GN=trxC PE=4 SV=1 - [A5CP35_CLAM3]	IV.5.2	27.82	1	3	3	6	catalytic activity		metabolic process; cellular homeostasis; regulation of biological process	133	14.065	4.37354
A5CS31	CMM_1839	Putative acetyltransferase OS=Clavibacter michiganensis subsp. michiganensis (strain NCPPB 382) GN=CMM_1839 PE=4 SV=1 - [A5CS31_CLAM3]	V.1.4	41.38	1	3	3	7	catalytic activity		metabolic process	145	15.8631	6.78564
A5CNB0	CMM_0523	Glycosyl hydrolase, family 13 OS=Clavibacter michiganensis subsp. michiganensis (strain NCPPB 382) GN=CMM_0523 PE=4 SV=1 - [A5CNB0_CLAM3]	I.1.8	15.96	1	3	3	7	catalytic activity		metabolic process	451	48.3053	5.46533
A5CND3	CMM_0545	Probable potassium uptake system NAD-binding protein OS=Clavibacter michiganensis subsp. michiganensis (strain NCPPB 382) GN=trkA PE=4 SV=1 - [A5CND3_CLAM3]	IV.1.16	13.96	1	2	2	6	transporter activity		transport	222	23.9808	7.2251
A5CQF9	CMM_1268	Putative NAD-dependant epimerase OS=Clavibacter michiganensis subsp. michiganensis (strain NCPPB 382) GN=CMM_1268 PE=4 SV=1 - [A5CQF9_CLAM3]	I.1.12	9.79	1	2	2	6	catalytic activity		metabolic process	337	36.24	8.68994
A5CRM9	CMM_1685	Putative helicase OS=Clavibacter michiganensis subsp. michiganensis (strain NCPPB 382) GN=CMM_1685 PE=4 SV=1 - [A5CRM9_CLAM3]	III.1.1	7.05	1	4	4	7	nucleotide binding; DNA binding; catalytic activity		metabolic process	823	92.2186	8.32373
A5CLL6	pCM2_0005	Ssb protein OS=Clavibacter michiganensis subsp. michiganensis (strain NCPPB 382) GN=ssb PE=4 SV=1 - [A5CLL6_CLAM3]	III.1.1	41.6	2	4	4	7	DNA binding			125	13.3418	8.76318
A5CPQ8	CMM_1018	Putative glycosyltransferase OS=Clavibacter michiganensis subsp. michiganensis (strain NCPPB 382) GN=wcqH PE=4 SV=1 - [A5CPQ8_CLAM3]	II.2.9	22.81	1	3	3	5	catalytic activity		metabolic process	320	34.6023	10.6821
A5CQM6	CMM_1335	Homoserine O-acetyltransferase OS=Clavibacter michiganensis subsp. michiganensis (strain NCPPB 382) GN=metX PE=3 SV=1 - [METX_CLAM3]	I.2.8	7.2	1	2	2	4	catalytic activity	cytoplasm	metabolic process	389	41.0387	5.22412
A5CNL8	CMM_0629	Uncharacterized protein OS=Clavibacter michiganensis subsp. michiganensis (strain NCPPB 382) GN=CMM_0629 PE=4 SV=1 - [A5CNL8_CLAM3]	I.2.3	14.64	1	2	2	5	catalytic activity	cytoplasm	metabolic process	280	30.4411	4.56396
A5CUH1	CMM_2674	Putative glycosyl transferase OS=Clavibacter michiganensis subsp. michiganensis (strain NCPPB 382) GN=CMM_2674 PE=4 SV=1 - [A5CUH1_CLAM3]	II.2.4	8.73	1	2	2	4	catalytic activity		metabolic process	355	37.2874	5.26221
A5CTF9	CMM_2313	Cyclic pyranopterin monophosphate synthase accessory protein OS=Clavibacter michiganensis subsp. michiganensis (strain NCPPB 382) GN=moaC PE=3 SV=1 - [A5CTF9_CLAM3]	I.5.9	20.12	1	2	2	4			metabolic process	164	16.928	6.80029

## Sheet: Table S3. M9 only
Accession	Gene Name	Description	COG	ΣCoverage	Σ# Proteins	Σ# Unique Peptides	Σ# Peptides	Σ# PSMs	Molecular Function	Cellular Component	Biological Process	# AAs	MW [kDa]	calc. pI
A5CLR6	pCM2_0053	Putative extracellular serine protease OS=Clavibacter michiganensis subsp. michiganensis (strain NCPPB 382) GN=phpA PE=3 SV=1 - [A5CLR6_CLAM3]	IV.6.1	47.65	1	7	12	40	catalytic activity		metabolic process	277	29.622	8.55811
A5CUG3	CMM_2667	Uncharacterized protein OS=Clavibacter michiganensis subsp. michiganensis (strain NCPPB 382) GN=CMM_2667 PE=4 SV=1 - [A5CUG3_CLAM3]	V.2.1	32.48	1	6	6	12				274	29.5163	9.92041
A5CM85	CMM_0150	Putative cell wall surface anchor family protein OS=Clavibacter michiganensis subsp. michiganensis (strain NCPPB 382) GN=CMM_0150 PE=4 SV=1 - [A5CM85_CLAM3]	II.2.5	8.91	1	5	5	9				1134	111.778	8.30908
A5CN64	CMM_0477	Uncharacterized protein OS=Clavibacter michiganensis subsp. michiganensis (strain NCPPB 382) GN=CMM_0477 PE=4 SV=1 - [A5CN64_CLAM3]	IV.4.5	31.33	1	5	6	13				249	26.2884	4.77979
A5CSS9	CMM_2086	Uncharacterized protein OS=Clavibacter michiganensis subsp. michiganensis (strain NCPPB 382) GN=CMM_2086 PE=4 SV=1 - [A5CSS9_CLAM3]	V.2.1	28.46	1	11	11	31			metabolic process	527	57.1811	6.40479
A5CLT3	CMM_0001	Chromosomal replication initiator protein DnaA OS=Clavibacter michiganensis subsp. michiganensis (strain NCPPB 382) GN=dnaA PE=3 SV=1 - [DNAA_CLAM3]	III.1.1	20.75	1	8	8	15	nucleotide binding; DNA binding; catalytic activity	cytoplasm	metabolic process; regulation of biological process	477	53.1895	6.53662
A5CSN3	CMM_2041	GmpB protein OS=Clavibacter michiganensis subsp. michiganensis (strain NCPPB 382) GN=gmpB PE=4 SV=1 - [A5CSN3_CLAM3]	I.1.1	38	1	6	6	17	catalytic activity		metabolic process	200	22.129	5.8335
A5CN91	CMM_0504	Putative phospholipase C OS=Clavibacter michiganensis subsp. michiganensis (strain NCPPB 382) GN=CMM_0504 PE=4 SV=1 - [A5CN91_CLAM3]	V.1.6	11.88	1	5	5	6	catalytic activity		metabolic process	724	78.2095	5.98584
A5CRB4	CMM_1572	Putative two-component system, sensor kinase OS=Clavibacter michiganensis subsp. michiganensis (strain NCPPB 382) GN=CMM_1572 PE=4 SV=1 - [A5CRB4_CLAM3]	IV.3.2	12.13	1	4	4	11	catalytic activity; receptor activity; signal transducer activity; nucleotide binding; protein binding		regulation of biological process; response to stimulus; metabolic process	503	51.9644	7.02002
A5CTF3	CMM_2307	Putative membrane protein OS=Clavibacter michiganensis subsp. michiganensis (strain NCPPB 382) GN=CMM_2307 PE=4 SV=1 - [A5CTF3_CLAM3]	V.2.1	10.57	1	4	4	6				577	59.4945	9.30518
A5CU47	CMM_2551	DNA helicase OS=Clavibacter michiganensis subsp. michiganensis (strain NCPPB 382) GN=uvrD1 PE=4 SV=1 - [A5CU47_CLAM3]	III.1.3	19.49	1	13	13	20	nucleotide binding; DNA binding; catalytic activity		metabolic process	816	89.497	5.84619
A5CRA9	CMM_1568	Putative phosphate starvation-induced ATPase OS=Clavibacter michiganensis subsp. michiganensis (strain NCPPB 382) GN=CMM_1568 PE=4 SV=1 - [A5CRA9_CLAM3]	V.1.5	45.27	1	9	9	25	RNA binding; nucleotide binding			349	38.5268	5.43994
A5CV90	CMM_2942	Putative 2-keto-acid dehydrogenase,dihydrolipoamide acetyltransferase E2 component OS=Clavibacter michiganensis subsp. michiganensis (strain NCPPB 382) GN=CMM_2942 PE=3 SV=1 - [A5CV90_CLAM3]	I.1.3	18.45	1	7	7	15	catalytic activity		metabolic process	466	49.185	5.07178
A5CT63	CMM_2218	Uncharacterized protein OS=Clavibacter michiganensis subsp. michiganensis (strain NCPPB 382) GN=CMM_2218 PE=4 SV=1 - [A5CT63_CLAM3]	V.2.1	53.91	1	6	6	13				230	24.0491	5.5542
A5CS12	CMM_1820	Uncharacterized protein OS=Clavibacter michiganensis subsp. michiganensis (strain NCPPB 382) GN=CMM_1820 PE=4 SV=1 - [A5CS12_CLAM3]	V.2.1	63.89	1	6	6	14	catalytic activity		metabolic process	180	19.8029	5.90967
A5CP64	CMM_0825	Putative cell surface protein OS=Clavibacter michiganensis subsp. michiganensis (strain NCPPB 382) GN=wcoG PE=4 SV=1 - [A5CP64_CLAM3]	II.2.8	4.54	1	5	5	6	protein binding			1961	201.058	5.21143
A5CQU3	CMM_1401	Putative glycosyl hydrolase OS=Clavibacter michiganensis subsp. michiganensis (strain NCPPB 382) GN=glgX PE=4 SV=1 - [A5CQU3_CLAM3]	I.1.8	12.28	1	5	6	9	catalytic activity		metabolic process	692	75.4137	5.57959
A5CTL5	CMM_2369	Uncharacterized protein OS=Clavibacter michiganensis subsp. michiganensis (strain NCPPB 382) GN=CMM_2369 PE=4 SV=1 - [A5CTL5_CLAM3]	III.1.6	25.95	1	5	5	15	catalytic activity		metabolic process	316	34.5892	5.04639
A5CSE4	CMM_1952	High-affinity choline/glycine/betaine transport protein, BCCT family OS=Clavibacter michiganensis subsp. michiganensis (strain NCPPB 382) GN=betT PE=4 SV=1 - [A5CSE4_CLAM3]	IV.1.15	10.67	1	4	4	5	transporter activity	membrane	transport	703	76.1704	6.0874
A5CTT1	CMM_2435	Putative alpha-L-arabinofuranosidase OS=Clavibacter michiganensis subsp. michiganensis (strain NCPPB 382) GN=abfA2 PE=4 SV=1 - [A5CTT1_CLAM3]	I.1.8	15.04	1	4	4	8	catalytic activity		metabolic process	512	56.7102	5.05908
A5CSW0	CMM_2115	Hydroxyethylthiazole kinase OS=Clavibacter michiganensis subsp. michiganensis (strain NCPPB 382) GN=thiM PE=3 SV=1 - [THIM_CLAM3]	I.5.5	21.09	1	4	4	8	nucleotide binding; metal ion binding; catalytic activity		metabolic process	275	27.4834	5.14795
A5CQG7	CMM_1276	Uncharacterized protein OS=Clavibacter michiganensis subsp. michiganensis (strain NCPPB 382) GN=CMM_1276 PE=4 SV=1 - [A5CQG7_CLAM3]	V.2.2	25.35	1	4	4	7				217	23.1595	5.2876
A5CU09	CMM_2513	Hypothetical esterase OS=Clavibacter michiganensis subsp. michiganensis (strain NCPPB 382) GN=CMM_2513 PE=4 SV=1 - [A5CU09_CLAM3]	V.1.6	30.32	1	4	4	9	catalytic activity		metabolic process	221	22.9113	4.29736
A5CSH7	CMM_1985	NAD kinase OS=Clavibacter michiganensis subsp. michiganensis (strain NCPPB 382) GN=nadK PE=3 SV=1 - [A5CSH7_CLAM3]	I.1.7	11.48	1	3	3	6	nucleotide binding; catalytic activity; metal ion binding	cytoplasm	metabolic process	305	32.8241	5.24951
A5CQB4	CMM_1223	Putative acetyltransferase OS=Clavibacter michiganensis subsp. michiganensis (strain NCPPB 382) GN=CMM_1223 PE=4 SV=1 - [A5CQB4_CLAM3]	V.1.4	31.38	1	3	3	3	catalytic activity		metabolic process	188	19.7391	5.18604
A5CM78	CMM_0143	Uncharacterized protein OS=Clavibacter michiganensis subsp. michiganensis (strain NCPPB 382) GN=CMM_0143 PE=4 SV=1 - [A5CM78_CLAM3]	II.2.5	23.57	1	3	3	9				280	28.5506	7.97217
A5CRK7	CMM_1664	Uncharacterized protein OS=Clavibacter michiganensis subsp. michiganensis (strain NCPPB 382) GN=CMM_1664 PE=4 SV=1 - [A5CRK7_CLAM3]	V.2.1	19.7	1	3	3	8				198	20.8964	4.77979
A5CR38	CMM_1497	Ribosomal silencing factor RsfS OS=Clavibacter michiganensis subsp. michiganensis (strain NCPPB 382) GN=rsfS PE=3 SV=1 - [A5CR38_CLAM3]	V.2.1	57.6	1	3	4	9		cytoplasm	regulation of biological process; cell organization and biogenesis	125	13.6601	4.7417
A5CTX7	CMM_2482	Uncharacterized protein OS=Clavibacter michiganensis subsp. michiganensis (strain NCPPB 382) GN=CMM_2482 PE=4 SV=1 - [A5CTX7_CLAM3]	IV.5.2	82.71	1	8	8	17	catalytic activity; metal ion binding		response to stimulus; metabolic process	133	15.0259	4.79248
A5CRJ0	CMM_1647	Putative UDP-N-acetylmuramyl tripeptide synthase OS=Clavibacter michiganensis subsp. michiganensis (strain NCPPB 382) GN=murX PE=4 SV=1 - [A5CRJ0_CLAM3]	II.2.1	24.18	1	8	8	13	nucleotide binding; catalytic activity		metabolic process	426	44.8432	5.50342
A5CSR9	CMM_2076	Uncharacterized protein OS=Clavibacter michiganensis subsp. michiganensis (strain NCPPB 382) GN=CMM_2076 PE=4 SV=1 - [A5CSR9_CLAM3]	V.2.2	32.12	1	8	8	16		extracellular	transport; metabolic process	302	31.4721	5.74463
A5CSX4	CMM_2128	Thiamine pyrophosphate-requiring enzyme,putative pyruvate dehydrogenase OS=Clavibacter michiganensis subsp. michiganensis (strain NCPPB 382) GN=poxB PE=3 SV=1 - [A5CSX4_CLAM3]	I.1.3	19.86	1	8	8	12	metal ion binding; catalytic activity		metabolic process	584	61.4679	5.87158
A5CSH6	CMM_1984	DNA repair protein RecN OS=Clavibacter michiganensis subsp. michiganensis (strain NCPPB 382) GN=recN PE=3 SV=1 - [A5CSH6_CLAM3]	III.1.3	24.69	1	8	8	19	nucleotide binding		metabolic process; response to stimulus	571	60.1533	4.80518
A5CRX3	CMM_1780	Guanylate kinase OS=Clavibacter michiganensis subsp. michiganensis (strain NCPPB 382) GN=gmkA PE=3 SV=1 - [A5CRX3_CLAM3]	I.3.1	35.43	1	8	8	19	nucleotide binding; DNA binding; catalytic activity; protein binding	cytoplasm	metabolic process; response to stimulus	302	33.2206	6.13818
A5CRA6	CMM_1564	Heat-inducible transcription repressor HrcA OS=Clavibacter michiganensis subsp. michiganensis (strain NCPPB 382) GN=hrcA PE=3 SV=1 - [HRCA_CLAM3]	IV.3.1	31.47	1	7	7	11	DNA binding		metabolic process; regulation of biological process; response to stimulus	340	36.6133	5.26221
A5CSY9	CMM_2144	tRNA pseudouridine synthase B OS=Clavibacter michiganensis subsp. michiganensis (strain NCPPB 382) GN=truB PE=3 SV=1 - [A5CSY9_CLAM3]	III.3.4	26.33	1	7	7	11	RNA binding; catalytic activity		metabolic process	319	33.8978	5.64307
A5CTR5	CMM_2418	Putative long-chain-fatty-acid-CoA ligase OS=Clavibacter michiganensis subsp. michiganensis (strain NCPPB 382) GN=fadD PE=4 SV=1 - [A5CTR5_CLAM3]	I.4.1	20.08	1	7	7	13	catalytic activity		metabolic process	528	56.8163	5.35107
A5CPU7	CMM_1057	Uncharacterized protein OS=Clavibacter michiganensis subsp. michiganensis (strain NCPPB 382) GN=CMM_1057 PE=4 SV=1 - [A5CPU7_CLAM3]	V.2.1	57.55	1	7	7	26				212	21.5533	5.33838
A5CP36	CMM_0797	Putative ATP-dependent DNA helicase OS=Clavibacter michiganensis subsp. michiganensis (strain NCPPB 382) GN=recQ3 PE=4 SV=1 - [A5CP36_CLAM3]	III.1.7	13.88	1	6	6	10	nucleotide binding; catalytic activity		metabolic process; response to stimulus; cell communication	627	68.4843	5.90967
A5CPK2	CMM_0962	RibC protein OS=Clavibacter michiganensis subsp. michiganensis (strain NCPPB 382) GN=ribC PE=4 SV=1 - [A5CPK2_CLAM3]	I.5.3	41.74	1	6	6	12	catalytic activity		metabolic process	218	22.8247	4.7417
A5CS47	CMM_1855	Uncharacterized protein OS=Clavibacter michiganensis subsp. michiganensis (strain NCPPB 382) GN=CMM_1855 PE=3 SV=1 - [A5CS47_CLAM3]	V.2.1	38.68	1	6	6	19				243	25.6523	6.354
A5CQI6	CMM_1294	Glutamate racemase OS=Clavibacter michiganensis subsp. michiganensis (strain NCPPB 382) GN=murI PE=3 SV=1 - [A5CQI6_CLAM3]	II.2.1	19.39	1	5	5	8	catalytic activity		metabolic process; regulation of biological process; cell organization and biogenesis	294	30.8147	5.10986
A5CV83	CMM_2936	50S ribosomal protein L33 OS=Clavibacter michiganensis subsp. michiganensis (strain NCPPB 382) GN=rpmG PE=3 SV=1 - [RL33_CLAM3]	III.3.1	67.27	1	5	5	8	structural molecule activity	ribosome	metabolic process	55	6.61062	10.7114
A5CRB3	CMM_1571	GTPase Era OS=Clavibacter michiganensis subsp. michiganensis (strain NCPPB 382) GN=eraA PE=3 SV=1 - [A5CRB3_CLAM3]	III.3.5	19.14	1	5	5	10	nucleotide binding; RNA binding; catalytic activity; transporter activity	cytoplasm; membrane	metabolic process; transport	350	37.9502	5.35107
A5CR70	CMM_1528	Uncharacterized protein OS=Clavibacter michiganensis subsp. michiganensis (strain NCPPB 382) GN=CMM_1528 PE=4 SV=1 - [A5CR70_CLAM3]	V.2.1	23.87	1	5	5	10				243	25.8883	4.60205
A5CQ88	CMM_1197	DNA helicase OS=Clavibacter michiganensis subsp. michiganensis (strain NCPPB 382) GN=uvrD2 PE=4 SV=1 - [A5CQ88_CLAM3]	III.1.3	4.77	1	4	4	5	nucleotide binding; DNA binding; catalytic activity		metabolic process; response to stimulus	1091	117.593	5.09717
A5CNQ5	CMM_0666	Putative flavin-dependant reductase OS=Clavibacter michiganensis subsp. michiganensis (strain NCPPB 382) GN=CMM_0666 PE=4 SV=1 - [A5CNQ5_CLAM3]	I.1.4	36.59	1	4	4	7	nucleotide binding; catalytic activity		metabolic process	164	16.9619	5.98584
A5CUR3	CMM_2766	Putative two-component system, response regulator OS=Clavibacter michiganensis subsp. michiganensis (strain NCPPB 382) GN=CMM_2766 PE=4 SV=1 - [A5CUR3_CLAM3]	IV.3.2	22.18	1	4	4	6	signal transducer activity; DNA binding		regulation of biological process; response to stimulus; metabolic process	257	28.4549	5.22412
A5CUV9	CMM_2812	2-succinyl-5-enolpyruvyl-6-hydroxy-3-cyclohexene-1-carboxylate synthase OS=Clavibacter michiganensis subsp. michiganensis (strain NCPPB 382) GN=menD PE=3 SV=1 - [MEND_CLAM3]	I.5.8	11.56	1	4	4	6	catalytic activity; metal ion binding		metabolic process	588	61.3263	6.23975
A5CMP2	CMM_0306	Uncharacterized protein OS=Clavibacter michiganensis subsp. michiganensis (strain NCPPB 382) GN=CMM_0306 PE=4 SV=1 - [A5CMP2_CLAM3]	V.2.1	17.85	1	4	4	6				297	31.9601	4.93213
A5CRD9	CMM_1597	Putative glycosyltransferase OS=Clavibacter michiganensis subsp. michiganensis (strain NCPPB 382) GN=wcmF PE=4 SV=1 - [A5CRD9_CLAM3]	II.2.10	9.55	1	4	4	7	catalytic activity		metabolic process	419	46.2079	7.23975
A5CTL4	CMM_2368	Ribosomal RNA small subunit methyltransferase A OS=Clavibacter michiganensis subsp. michiganensis (strain NCPPB 382) GN=rsmA PE=3 SV=1 - [A5CTL4_CLAM3]	III.3.4	15.79	1	4	4	8	catalytic activity; RNA binding	cytoplasm	metabolic process	304	32.1971	6.02393
A5CPX1	CMM_1081	Uncharacterized protein OS=Clavibacter michiganensis subsp. michiganensis (strain NCPPB 382) GN=CMM_1081 PE=4 SV=1 - [A5CPX1_CLAM3]	V.2.2	13.47	1	4	4	7				475	47.3254	7.31299
A5CMK7	CMM_0270	Putative sugar ABC transporter, substrate binding protein OS=Clavibacter michiganensis subsp. michiganensis (strain NCPPB 382) GN=CMM_0270 PE=4 SV=1 - [A5CMK7_CLAM3]	IV.1.5	16.5	1	4	4	10	transporter activity		transport	412	42.9603	4.52588
A5CRQ0	CMM_1707	Putative esterase OS=Clavibacter michiganensis subsp. michiganensis (strain NCPPB 382) GN=CMM_1707 PE=4 SV=1 - [A5CRQ0_CLAM3]	V.1.6	19.77	1	4	4	10	catalytic activity		metabolic process	263	28.8758	6.17627
A5CU26	CMM_2530	Uncharacterized protein OS=Clavibacter michiganensis subsp. michiganensis (strain NCPPB 382) GN=CMM_2530 PE=4 SV=1 - [A5CU26_CLAM3]	V.2.1	29.41	1	4	5	10				306	32.3617	4.86865
A5CND9	CMM_0551	Uncharacterized protein OS=Clavibacter michiganensis subsp. michiganensis (strain NCPPB 382) GN=CMM_0551 PE=4 SV=1 - [A5CND9_CLAM3]	V.2.1	53	1	4	4	15				100	10.8296	5.77002
A5CPV7	CMM_1067	Putative L-asparagine permease, APC family OS=Clavibacter michiganensis subsp. michiganensis (strain NCPPB 382) GN=ansP PE=4 SV=1 - [A5CPV7_CLAM3]	IV.1.11	12.16	1	4	4	10	transporter activity	membrane	transport	510	54.5382	8.35303
A5CVC1	CMM_2973	Ribosomal RNA small subunit methyltransferase G OS=Clavibacter michiganensis subsp. michiganensis (strain NCPPB 382) GN=rsmG PE=3 SV=1 - [RSMG_CLAM3]	III.3.4	30.81	1	4	4	16	catalytic activity	cytoplasm	metabolic process	211	22.7504	5.31299
A5CQ34	CMM_1143	Putative short chain alcohol dehydrogenase OS=Clavibacter michiganensis subsp. michiganensis (strain NCPPB 382) GN=CMM_1143 PE=3 SV=1 - [A5CQ34_CLAM3]	V.1.3	20.39	1	3	3	5	catalytic activity		metabolic process	255	25.8396	5.46533
A5CLI8	pCM1_0005	Putative membrane protein OS=Clavibacter michiganensis subsp. michiganensis (strain NCPPB 382) GN=traG PE=4 SV=1 - [A5CLI8_CLAM3]	IV.2.5	6.55	1	3	3	4				733	79.6785	8.20654
A5CPJ6	CMM_0956	Putative peptide ABC transporter, substrate-binding protein OS=Clavibacter michiganensis subsp. michiganensis (strain NCPPB 382) GN=CMM_0956 PE=4 SV=1 - [A5CPJ6_CLAM3]	IV.1.4	7.6	1	3	3	4	transporter activity		transport	513	53.1141	4.77979
A5CU77	CMM_2581	tRNA pseudouridine synthase A OS=Clavibacter michiganensis subsp. michiganensis (strain NCPPB 382) GN=truA PE=3 SV=1 - [A5CU77_CLAM3]	III.3.4	12.57	1	3	3	4	RNA binding; catalytic activity		metabolic process	334	35.2212	6.26514
A5CNU1	CMM_0702	Putative acetyltransferase OS=Clavibacter michiganensis subsp. michiganensis (strain NCPPB 382) GN=CMM_0702 PE=4 SV=1 - [A5CNU1_CLAM3]	V.1.4	18.31	1	3	3	4	catalytic activity		metabolic process	213	22.7659	7.60596
A5CLT1	pCM2_0068	Uncharacterized protein OS=Clavibacter michiganensis subsp. michiganensis (strain NCPPB 382) GN=pCM2_0068 PE=4 SV=1 - [A5CLT1_CLAM3]	V.2.2	32.43	1	3	3	5				111	12.2893	5.47803
A5CR09	CMM_1468	Putative peptidyl-dipeptidase OS=Clavibacter michiganensis subsp. michiganensis (strain NCPPB 382) GN=dcpA PE=3 SV=1 - [A5CR09_CLAM3]	I.2.10	7.86	1	3	3	4	catalytic activity		metabolic process	687	76.0293	4.89404
A5CLJ4	pCM1_0011	Hypothetical secreted protein OS=Clavibacter michiganensis subsp. michiganensis (strain NCPPB 382) GN=pCM1_0011 PE=4 SV=1 - [A5CLJ4_CLAM3]	IV.2.5	19.75	1	3	3	6			metabolic process	238	24.0769	5.04639
A5CNC0	CMM_0532	Aspartate 1-decarboxylase OS=Clavibacter michiganensis subsp. michiganensis (strain NCPPB 382) GN=panD PE=3 SV=1 - [PAND_CLAM3]	I.5.1	26.81	1	3	3	8	catalytic activity	cytoplasm	metabolic process	138	14.5616	5.2749
A5CS60	CMM_1868	Transcriptional regulator MraZ OS=Clavibacter michiganensis subsp. michiganensis (strain NCPPB 382) GN=mraZ PE=3 SV=1 - [MRAZ_CLAM3]	II.1.1	18.18	1	3	3	6	DNA binding	cytoplasm	metabolic process; regulation of biological process	143	16.1661	5.37646
A5CT03	CMM_2158	Putative serine/threonine protein kinase OS=Clavibacter michiganensis subsp. michiganensis (strain NCPPB 382) GN=pknF PE=3 SV=1 - [A5CT03_CLAM3]	IV.3.7	8.65	1	3	3	5	nucleotide binding; catalytic activity; enzyme regulator activity		metabolic process	416	42.9943	5.2876
A5CUR0	CMM_2763	Putative acetyltransferase OS=Clavibacter michiganensis subsp. michiganensis (strain NCPPB 382) GN=CMM_2763 PE=4 SV=1 - [A5CUR0_CLAM3]	V.1.4	21.11	1	3	3	4	catalytic activity		metabolic process	180	19.8862	5.14795
A5CS58	CMM_1866	Uncharacterized protein OS=Clavibacter michiganensis subsp. michiganensis (strain NCPPB 382) GN=CMM_1866 PE=4 SV=1 - [A5CS58_CLAM3]	V.2.1	45.09	1	3	3	12				224	22.6619	8.6167
A5CV13	CMM_2866	Uncharacterized protein OS=Clavibacter michiganensis subsp. michiganensis (strain NCPPB 382) GN=CMM_2866 PE=4 SV=1 - [A5CV13_CLAM3]	V.2.1	16.74	1	3	3	7	catalytic activity		metabolic process	239	24.7596	4.71631
A5CU71	CMM_2574	Alanine racemase OS=Clavibacter michiganensis subsp. michiganensis (strain NCPPB 382) GN=alrA1 PE=3 SV=1 - [A5CU71_CLAM3]	II.2.1	7.27	1	3	3	8	catalytic activity		metabolic process	385	39.5579	6.55127
A5CTJ5	CMM_2349	Putative Fe3+-siderophore ABC transporter,substrate-binding protein OS=Clavibacter michiganensis subsp. michiganensis (strain NCPPB 382) GN=fecB1 PE=4 SV=1 - [A5CTJ5_CLAM3]	IV.1.7	12.04	1	3	3	10				324	33.1381	4.52588
A5CQU7	CMM_1406	Putative secreted protein OS=Clavibacter michiganensis subsp. michiganensis (strain NCPPB 382) GN=CMM_1406 PE=4 SV=1 - [A5CQU7_CLAM3]	V.2.1	45.7	1	3	3	11				151	15.7368	5.97314
A5CPP4	CMM_1004	N5-carboxyaminoimidazole ribonucleotide mutase OS=Clavibacter michiganensis subsp. michiganensis (strain NCPPB 382) GN=purE PE=3 SV=1 - [A5CPP4_CLAM3]	I.3.1	20.69	1	3	3	5	catalytic activity		metabolic process	174	18.0615	5.8208
A5CV36	CMM_2889	Isopentenyl-diphosphate Delta-isomerase OS=Clavibacter michiganensis subsp. michiganensis (strain NCPPB 382) GN=idi PE=3 SV=1 - [IDI_CLAM3]	I.6.4	18.04	1	2	2	4	catalytic activity; metal ion binding	cytoplasm	metabolic process	194	21.1667	4.94482
A5CNG1	CMM_0573	o-succinylbenzoate synthase OS=Clavibacter michiganensis subsp. michiganensis (strain NCPPB 382) GN=menC PE=3 SV=1 - [A5CNG1_CLAM3]	I.5.8	7.03	1	2	2	4	catalytic activity; metal ion binding		metabolic process	327	35.2257	5.57959
A5CNE4	CMM_0556	Putative membrane protein OS=Clavibacter michiganensis subsp. michiganensis (strain NCPPB 382) GN=CMM_0556 PE=4 SV=1 - [A5CNE4_CLAM3]	V.2.2	5.69	1	2	2	4				211	21.8628	11.6636
A5CQR7	CMM_0556	Uncharacterized protein OS=Clavibacter michiganensis subsp. michiganensis (strain NCPPB 382) GN=CMM_1376 PE=4 SV=1 - [A5CQR7_CLAM3]	V.2.1	19.63	1	2	2	4				107	13.2195	4.4624
A5CQF7	CMM_1266	Putative Zn-metalloprotease OS=Clavibacter michiganensis subsp. michiganensis (strain NCPPB 382) GN=CMM_1266 PE=4 SV=1 - [A5CQF7_CLAM3]	IV.7.1	11.22	1	2	2	4	catalytic activity		metabolic process	303	31.1618	4.56396
A5CRN6	CMM_1693	Uncharacterized protein OS=Clavibacter michiganensis subsp. michiganensis (strain NCPPB 382) GN=CMM_1693 PE=4 SV=1 - [A5CRN6_CLAM3]	V.2.1	8.15	1	2	2	2				319	34.5082	4.55127
A5CSM3	CMM_2030	Cell division protein OS=Clavibacter michiganensis subsp. michiganensis (strain NCPPB 382) GN=ftsK PE=4 SV=1 - [A5CSM3_CLAM3]	II.1.1	3.58	1	2	2	2	nucleotide binding; DNA binding; catalytic activity		metabolic process; cell division	951	100.971	5.30029
A5CUR5	CMM_2768	Conserved membrane protein, putative exporter OS=Clavibacter michiganensis subsp. michiganensis (strain NCPPB 382) GN=CMM_2768 PE=4 SV=1 - [A5CUR5_CLAM3]	IV.1.16	7.02	1	2	2	2				342	37.8463	8.11865
A5CTK6	CMM_2360	Conserved membrane protein OS=Clavibacter michiganensis subsp. michiganensis (strain NCPPB 382) GN=CMM_2360 PE=4 SV=1 - [A5CTK6_CLAM3]	V.2.1	12.73	1	2	2	2				165	17.1719	6.80029
A5CUD8	CMM_2642	Uncharacterized protein OS=Clavibacter michiganensis subsp. michiganensis (strain NCPPB 382) GN=CMM_2642 PE=4 SV=1 - [A5CUD8_CLAM3]	V.2.1	16.57	1	2	2	2				175	18.2283	4.43701
A5CRI1	CMM_1638	Putative chaperone OS=Clavibacter michiganensis subsp. michiganensis (strain NCPPB 382) GN=CMM_1638 PE=4 SV=1 - [A5CRI1_CLAM3]	IV.4.1	14.11	1	2	2	2	protein binding			241	25.365	6.55127
A5CN47	CMM_0460	Uncharacterized protein OS=Clavibacter michiganensis subsp. michiganensis (strain NCPPB 382) GN=CMM_0460 PE=4 SV=1 - [A5CN47_CLAM3]	II.2.5	6.91	1	2	2	2	catalytic activity		metabolic process	564	58.8914	5.13525
A5CPZ7	CMM_1107	Uncharacterized protein OS=Clavibacter michiganensis subsp. michiganensis (strain NCPPB 382) GN=CMM_1107 PE=4 SV=1 - [A5CPZ7_CLAM3]	V.2.2	12.7	1	2	2	4				252	26.057	4.58936
A5CSY7	CMM_2142	Putative membrane protein OS=Clavibacter michiganensis subsp. michiganensis (strain NCPPB 382) GN=CMM_2142 PE=4 SV=1 - [A5CSY7_CLAM3]	V.2.2	8.5	1	2	2	2				153	16.6791	10.1694
A5CN63	CMM_0476	Uncharacterized protein OS=Clavibacter michiganensis subsp. michiganensis (strain NCPPB 382) GN=CMM_0476 PE=4 SV=1 - [A5CN63_CLAM3]	V.2.2	19.08	1	2	2	4				131	12.9359	4.41162
A5CS05	CMM_1813	Uncharacterized protein OS=Clavibacter michiganensis subsp. michiganensis (strain NCPPB 382) GN=CMM_1813 PE=4 SV=1 - [A5CS05_CLAM3]	IV.2.1	34.65	1	2	2	6				127	13.77	4.64014
A5CS22	CMM_1830	Putative glycerol uptake facilitator protein,MIP family OS=Clavibacter michiganensis subsp. michiganensis (strain NCPPB 382) GN=glpF PE=3 SV=1 - [A5CS22_CLAM3]	IV.1.20	9.2	1	2	2	6	transporter activity	membrane	transport	250	25.2166	5.79541
A5CSJ7	CMM_2005	Putative glutamate ABC transpoter, permease component OS=Clavibacter michiganensis subsp. michiganensis (strain NCPPB 382) GN=gluC PE=3 SV=1 - [A5CSJ7_CLAM3]	IV.1.4	12.09	1	2	2	6	transporter activity	membrane	transport	215	22.9127	9.59814
A5CRB0	CMM_1567	Putative HIT family hydrolase OS=Clavibacter michiganensis subsp. michiganensis (strain NCPPB 382) GN=CMM_1567 PE=4 SV=1 - [A5CRB0_CLAM3]	V.1.6	18.64	1	2	2	9	catalytic activity		metabolic process	118	12.4875	5.04639
A5CRC5	CMM_1583	Uncharacterized protein OS=Clavibacter michiganensis subsp. michiganensis (strain NCPPB 382) GN=CMM_1583 PE=4 SV=1 - [A5CRC5_CLAM3]	V.2.1	19.5	1	2	2	8	catalytic activity		metabolic process	241	26.3022	4.81787
A5CRY5	CMM_1792	N utilization substance protein B homolog OS=Clavibacter michiganensis subsp. michiganensis (strain NCPPB 382) GN=nusB PE=3 SV=1 - [NUSB_CLAM3]	III.2.1	18.25	1	2	2	6	RNA binding		metabolic process; regulation of biological process	137	15.0197	4.88135
A5CQ79	CMM_1188	Conserved membrane protein OS=Clavibacter michiganensis subsp. michiganensis (strain NCPPB 382) GN=CMM_1188 PE=4 SV=1 - [A5CQ79_CLAM3]	V.2.1	20.72	1	2	2	10				222	23.0109	6.16357
A5CT45	CMM_2200	Putative copper resistance protein OS=Clavibacter michiganensis subsp. michiganensis (strain NCPPB 382) GN=CMM_2200 PE=4 SV=1 - [A5CT45_CLAM3]	IV.5.3	13.67	1	2	2	8	metal ion binding		response to stimulus	256	25.5266	4.50049
A5CUI9	CMM_2691	Putative endoglucanase OS=Clavibacter michiganensis subsp. michiganensis (strain NCPPB 382) GN=CMM_2691 PE=4 SV=1 - [A5CUI9_CLAM3]	IV.6.3	11.11	1	2	2	6	catalytic activity		metabolic process	333	34.7705	5.31299
A5CNK5	CMM_0617	Uncharacterized protein OS=Clavibacter michiganensis subsp. michiganensis (strain NCPPB 382) GN=CMM_0617 PE=4 SV=1 - [A5CNK5_CLAM3]	IV.5.3	13.45	1	2	2	5	metal ion binding		response to stimulus	275	25.6048	4.84326
A5CPM4	CMM_0984	Putative phosphotransferase system mannitol/fructose-specific IIA domain OS=Clavibacter michiganensis subsp. michiganensis (strain NCPPB 382) GN=CMM_0984 PE=4 SV=1 - [A5CPM4_CLAM3]	IV.1.20	22.82	1	2	2	8	transporter activity; catalytic activity		transport; metabolic process	149	15.4249	4.70361
A5CSK9	CMM_2017	Conserved membrane protein OS=Clavibacter michiganensis subsp. michiganensis (strain NCPPB 382) GN=CMM_2017 PE=4 SV=1 - [A5CSK9_CLAM3]	V.2.1	23.48	1	2	2	14			metabolic process	132	13.311	5.37646
A5CRU3	CMM_1750	UvrABC system protein B OS=Clavibacter michiganensis subsp. michiganensis (strain NCPPB 382) GN=uvrB PE=3 SV=1 - [UVRB_CLAM3]	III.1.3	22.09	1	10	11	21	nucleotide binding; DNA binding; catalytic activity; protein binding	cytoplasm	metabolic process; response to stimulus; cell communication	688	77.4397	5.2876
A5CPV4	CMM_1062	Putative alkyl hydroperoxide reductase OS=Clavibacter michiganensis subsp. michiganensis (strain NCPPB 382) GN=bcp PE=4 SV=1 - [A5CPV4_CLAM3]	IV.5.1	81.76	1	10	10	38	antioxidant activity; catalytic activity		metabolic process	159	17.2007	5.37646
A5CSG5	CMM_1973	Putative acyl-CoA dehydrogenase OS=Clavibacter michiganensis subsp. michiganensis (strain NCPPB 382) GN=CMM_1973 PE=4 SV=1 - [A5CSG5_CLAM3]	V.1.3	35.44	1	12	12	22	catalytic activity; nucleotide binding		metabolic process	443	47.9048	5.87158
A5CST5	CMM_2092	Heat shock protein, HSP20 family OS=Clavibacter michiganensis subsp. michiganensis (strain NCPPB 382) GN=hsp20 PE=3 SV=1 - [A5CST5_CLAM3]	IV.4.1	63.16	1	9	9	25			response to stimulus	152	16.6245	5.36377
A5CUU9	CMM_2802	UPF0234 protein CMM_2802 OS=Clavibacter michiganensis subsp. michiganensis (strain NCPPB 382) GN=CMM_2802 PE=3 SV=1 - [Y2802_CLAM3]	V.2.1	52.47	1	9	9	43				162	18.1044	5.78271
A5CTB3	CMM_2268	Transcription-repair-coupling factor OS=Clavibacter michiganensis subsp. michiganensis (strain NCPPB 382) GN=mfdA PE=3 SV=1 - [A5CTB3_CLAM3]	III.2.1	18.35	1	14	14	20	nucleotide binding; DNA binding; catalytic activity	cytoplasm	cell organization and biogenesis; metabolic process; response to stimulus; regulation of biological process	1210	132.88	5.5542
A5CSC3	CMM_1931	Uncharacterized protein OS=Clavibacter michiganensis subsp. michiganensis (strain NCPPB 382) GN=CMM_1931 PE=4 SV=1 - [A5CSC3_CLAM3]	IV.3.1	48.2	1	9	9	17	nucleotide binding; catalytic activity		metabolic process	222	24.1263	5.59229
A5CRJ6	CMM_1653	Uncharacterized protein OS=Clavibacter michiganensis subsp. michiganensis (strain NCPPB 382) GN=CMM_1653 PE=4 SV=1 - [A5CRJ6_CLAM3]	IV.3.1	31.57	1	10	11	20				396	43.2268	5.51611
A5CR51	CMM_1509	Histidinol-phosphate aminotransferase OS=Clavibacter michiganensis subsp. michiganensis (strain NCPPB 382) GN=hisC1 PE=3 SV=1 - [A5CR51_CLAM3]	I.2.6	24.73	1	8	8	13	catalytic activity		metabolic process	372	40.686	4.89404
A5CLY6	CMM_0051	PelA2 protein OS=Clavibacter michiganensis subsp. michiganensis (strain NCPPB 382) GN=pelA2 PE=4 SV=1 - [A5CLY6_CLAM3]	IV.6.3	37.1	1	3	7	29	catalytic activity	extracellular	metabolic process	283	29.3698	6.94678
A5CPR6	CMM_1026	Putative glutaryl-CoA dehydrogenase OS=Clavibacter michiganensis subsp. michiganensis (strain NCPPB 382) GN=gcdH PE=3 SV=1 - [A5CPR6_CLAM3]	II.2.9	31.12	1	9	9	13	catalytic activity; nucleotide binding		metabolic process	392	42.3496	5.32568
A5CMH6	CMM_0240	Putative short-chain alcohol dehydrogenase OS=Clavibacter michiganensis subsp. michiganensis (strain NCPPB 382) GN=CMM_0240 PE=3 SV=1 - [A5CMH6_CLAM3]	V.1.3	35.87	1	8	8	15	catalytic activity		metabolic process	276	29.1055	4.65283
A5CM88	CMM_0153	Chaperone, curved DNA-binding protein OS=Clavibacter michiganensis subsp. michiganensis (strain NCPPB 382) GN=dnaJ1 PE=4 SV=1 - [A5CM88_CLAM3]	IV.4.1	29.97	1	7	7	15	DNA binding; protein binding		metabolic process	337	35.3981	8.99756
A5CN73	CMM_0486	Uncharacterized protein OS=Clavibacter michiganensis subsp. michiganensis (strain NCPPB 382) GN=CMM_0486 PE=4 SV=1 - [A5CN73_CLAM3]	IV.4.6	89.29	1	7	7	21				56	5.865	6.04932
A5CR22	CMM_1481	Putative SAM-dependant methyltransferase OS=Clavibacter michiganensis subsp. michiganensis (strain NCPPB 382) GN=CMM_1481 PE=4 SV=1 - [A5CR22_CLAM3]	V.1.2	26.1	1	6	6	10	catalytic activity		metabolic process	249	26.3783	4.93213
A5CN56	CMM_0469	Putative oxidoreductase OS=Clavibacter michiganensis subsp. michiganensis (strain NCPPB 382) GN=CMM_0469 PE=4 SV=1 - [A5CN56_CLAM3]	V.1.3	25.83	1	6	6	16	catalytic activity		metabolic process	302	32.0969	4.57666
A5CSK3	CMM_2011	Translation initiation factor IF-3 OS=Clavibacter michiganensis subsp. michiganensis (strain NCPPB 382) GN=infC PE=4 SV=1 - [A5CSK3_CLAM3]	III.3.3	41.73	1	6	6	14	RNA binding		metabolic process	139	15.8662	9.72998
A5CPP6	CMM_1006	Putative glycosyltransferase,mannosyltransferase OS=Clavibacter michiganensis subsp. michiganensis (strain NCPPB 382) GN=wcqB PE=4 SV=1 - [A5CPP6_CLAM3]	II.2.9	24.87	1	6	6	13	catalytic activity		metabolic process	394	41.9681	5.49072
A5CQ28	CMM_1136	Uncharacterized protein OS=Clavibacter michiganensis subsp. michiganensis (strain NCPPB 382) GN=CMM_1136 PE=4 SV=1 - [A5CQ28_CLAM3]	V.2.1	37.65	1	6	6	16				247	27.3418	4.93213
A5CQK8	CMM_1317	Putative GTPase OS=Clavibacter michiganensis subsp. michiganensis (strain NCPPB 382) GN=CMM_1317 PE=4 SV=1 - [A5CQK8_CLAM3]	V.1.5	26.82	1	6	6	10	nucleotide binding; catalytic activity; metal ion binding		metabolic process	358	38.4949	5.96045
A5CRH3	CMM_1630	Uncharacterized protein OS=Clavibacter michiganensis subsp. michiganensis (strain NCPPB 382) GN=CMM_1630 PE=4 SV=1 - [A5CRH3_CLAM3]	IV.3.1	43.03	1	8	8	13				244	27.4554	4.95752
A5CRJ1	CMM_1648	Putative glutamine amidotransferase OS=Clavibacter michiganensis subsp. michiganensis (strain NCPPB 382) GN=CMM_1648 PE=4 SV=1 - [A5CRJ1_CLAM3]	I.5.2	56.97	1	8	8	18	catalytic activity		metabolic process	244	25.0513	5.56689
A5CS20	CMM_1828	Putative dihydroxyacetone kinase OS=Clavibacter michiganensis subsp. michiganensis (strain NCPPB 382) GN=CMM_1828 PE=4 SV=1 - [A5CS20_CLAM3]	I.1.1	45.16	1	7	7	10	catalytic activity		metabolic process	217	21.374	4.98291
A5CPJ0	CMM_0950	Uncharacterized protein OS=Clavibacter michiganensis subsp. michiganensis (strain NCPPB 382) GN=CMM_0950 PE=4 SV=1 - [A5CPJ0_CLAM3]	V.2.1	57.61	1	7	7	11	catalytic activity; metal ion binding		metabolic process	184	19.5833	6.63916
A5CM01	CMM_0066	Partitioning protein OS=Clavibacter michiganensis subsp. michiganensis (strain NCPPB 382) GN=parX PE=4 SV=1 - [A5CM01_CLAM3]	II.1.2	42.38	1	7	7	13	nucleotide binding		cell organization and biogenesis; transport	210	22.7447	5.10986
A5CVC2	CMM_2974	Putative DNA/RNA binding protein OS=Clavibacter michiganensis subsp. michiganensis (strain NCPPB 382) GN=CMM_2974 PE=4 SV=1 - [A5CVC2_CLAM3]	V.1.7	44.86	1	7	7	15				185	19.7798	4.36084
A5CRW2	CMM_1769	Imidazole glycerol phosphate synthase subunit HisF OS=Clavibacter michiganensis subsp. michiganensis (strain NCPPB 382) GN=hisF PE=3 SV=1 - [HIS6_CLAM3]	I.2.6	38.4	1	7	7	13	catalytic activity	cytoplasm	metabolic process	263	27.1079	4.77979
A5CNJ1	CMM_0603	Putative Zinc-dependant oxidoreductase OS=Clavibacter michiganensis subsp. michiganensis (strain NCPPB 382) GN=CMM_0603 PE=4 SV=1 - [A5CNJ1_CLAM3]	V.1.3	24.34	1	6	6	8	catalytic activity; metal ion binding		metabolic process	341	33.7108	4.83057
A5CRR9	CMM_1726	Putative ABC transporter ATP-binding protein OS=Clavibacter michiganensis subsp. michiganensis (strain NCPPB 382) GN=CMM_1726 PE=3 SV=1 - [A5CRR9_CLAM3]	IV.1.1	18.05	1	6	7	12	nucleotide binding; catalytic activity		metabolic process	532	57.7489	5.64307
A5CPP9	CMM_1009	Putative dTDP-4-dehydrorhamnose reductase OS=Clavibacter michiganensis subsp. michiganensis (strain NCPPB 382) GN=rmlD PE=4 SV=1 - [A5CPP9_CLAM3]	II.2.9	38.73	1	6	6	9	catalytic activity		metabolic process	284	29.632	5.60498
A5CME7	CMM_0211	Putative monooxygenase OS=Clavibacter michiganensis subsp. michiganensis (strain NCPPB 382) GN=CMM_0211 PE=4 SV=1 - [A5CME7_CLAM3]	V.1.3	22.64	1	6	6	13	catalytic activity		metabolic process	349	37.7672	4.95752
A5CNG3	CMM_0575	Uncharacterized protein OS=Clavibacter michiganensis subsp. michiganensis (strain NCPPB 382) GN=CMM_0575 PE=4 SV=1 - [A5CNG3_CLAM3]	V.2.2	28.34	1	6	6	10				247	28.0966	6.07471
A5CS46	CMM_1854	Cell division protein SepF OS=Clavibacter michiganensis subsp. michiganensis (strain NCPPB 382) GN=sepF PE=3 SV=1 - [SEPF_CLAM3]	II.1.1	46.34	1	6	6	17		cytoplasm	cell organization and biogenesis; cell division	164	17.8261	5.87158
A5CQP0	CMM_1349	Thiamin-monophosphate kinase OS=Clavibacter michiganensis subsp. michiganensis (strain NCPPB 382) GN=thiL PE=4 SV=1 - [A5CQP0_CLAM3]	I.5.5	27.15	1	5	5	5	catalytic activity		metabolic process	361	35.8384	4.81787
A5CLP4	pCM2_0033	Putative ATPase, partitioning protein OS=Clavibacter michiganensis subsp. michiganensis (strain NCPPB 382) GN=parA PE=4 SV=1 - [A5CLP4_CLAM3]	II.1.2	18.36	1	5	5	9				256	27.4591	5.47803
A5CT60	CMM_2215	Uncharacterized protein OS=Clavibacter michiganensis subsp. michiganensis (strain NCPPB 382) GN=CMM_2215 PE=4 SV=1 - [A5CT60_CLAM3]	V.2.2	49.32	1	5	6	23			metabolic process	148	14.9314	8.08936
A5CRW7	CMM_1774	Putative rRNA cytosine-C5-methylases OS=Clavibacter michiganensis subsp. michiganensis (strain NCPPB 382) GN=CMM_1774 PE=4 SV=1 - [A5CRW7_CLAM3]	III.3.4	17.84	1	7	7	9	catalytic activity; RNA binding		regulation of biological process; metabolic process	499	52.4873	6.18896
A5CRC8	CMM_1586	DNA primase OS=Clavibacter michiganensis subsp. michiganensis (strain NCPPB 382) GN=dnaG PE=3 SV=1 - [A5CRC8_CLAM3]	III.1.1	17.65	1	7	7	16	DNA binding; catalytic activity; metal ion binding		metabolic process	629	68.3916	5.98584
A5CRD3	CMM_1591	Putative oligopeptide ABC transporter, ATP-binding protein OS=Clavibacter michiganensis subsp. michiganensis (strain NCPPB 382) GN=CMM_1591 PE=3 SV=1 - [A5CRD3_CLAM3]	IV.1.4	41.27	1	6	6	12	nucleotide binding; catalytic activity		metabolic process	315	33.0514	6.82959
A5CVB9	CMM_2971	Putative chromosome partitioning protein OS=Clavibacter michiganensis subsp. michiganensis (strain NCPPB 382) GN=parB1 PE=4 SV=1 - [A5CVB9_CLAM3]	II.1.2	32.52	1	6	6	8	DNA binding			329	35.4864	5.63037
A5CU61	CMM_2565	Putative branched-chain amino acid ABC transporter, ATPase component OS=Clavibacter michiganensis subsp. michiganensis (strain NCPPB 382) GN=livF PE=3 SV=1 - [A5CU61_CLAM3]	IV.1.4	31.35	1	6	6	16	nucleotide binding; catalytic activity		metabolic process	252	27.2862	7.94287
A5CPH8	CMM_0938	Putative multidrug export ABC transporter, ATP-binding protein OS=Clavibacter michiganensis subsp. michiganensis (strain NCPPB 382) GN=CMM_0938 PE=3 SV=1 - [A5CPH8_CLAM3]	IV.1.8	21.1	1	5	5	7	nucleotide binding; transporter activity; catalytic activity	membrane	metabolic process; transport	308	33.7477	5.50342
A5CR55	CMM_1513	Putative Zn-dependant oxidoreductase OS=Clavibacter michiganensis subsp. michiganensis (strain NCPPB 382) GN=CMM_1513 PE=4 SV=1 - [A5CR55_CLAM3]	V.1.3	23.38	1	5	5	11	metal ion binding; catalytic activity		metabolic process	325	33.0925	5.50342
A5CTG3	CMM_2317	S-methyl-5'-thioadenosine phosphorylase OS=Clavibacter michiganensis subsp. michiganensis (strain NCPPB 382) GN=mtnP PE=3 SV=1 - [A5CTG3_CLAM3]	I.3.1	28.1	1	5	5	6	catalytic activity		metabolic process	306	31.8214	5.22412
A5CSD8	CMM_1946	Putative oxidoreductase/monooxygenase OS=Clavibacter michiganensis subsp. michiganensis (strain NCPPB 382) GN=CMM_1946 PE=4 SV=1 - [A5CSD8_CLAM3]	V.1.3	15.13	1	5	5	8	catalytic activity		metabolic process	456	50.5283	5.46533
A5CMZ5	CMM_0409	Putative oxidoreductase OS=Clavibacter michiganensis subsp. michiganensis (strain NCPPB 382) GN=CMM_0409 PE=3 SV=1 - [A5CMZ5_CLAM3]	V.1.3	26.16	1	5	5	10	catalytic activity		metabolic process	237	24.6086	4.89404
A5CLP1	pCM2_0030	Uncharacterized protein OS=Clavibacter michiganensis subsp. michiganensis (strain NCPPB 382) GN=pCM2_0030 PE=4 SV=1 - [A5CLP1_CLAM3]	V.2.2	31.98	1	5	5	9	DNA binding			222	24.0873	5.26221
A5CTY5	CMM_2490	Putative transcriptional regulator, CarD family OS=Clavibacter michiganensis subsp. michiganensis (strain NCPPB 382) GN=CMM_2490 PE=4 SV=1 - [A5CTY5_CLAM3]	IV.3.1	50.63	1	5	5	11				160	17.8004	5.30029
A5CTC3	CMM_2278	Putative monooxygenase OS=Clavibacter michiganensis subsp. michiganensis (strain NCPPB 382) GN=CMM_2278 PE=4 SV=1 - [A5CTC3_CLAM3]	V.1.3	29.25	1	5	5	10	catalytic activity		metabolic process	335	35.513	5.49072
A5CU69	CMM_2573	Alanine racemase OS=Clavibacter michiganensis subsp. michiganensis (strain NCPPB 382) GN=alrA2 PE=3 SV=1 - [A5CU69_CLAM3]	II.2.1	11.84	1	5	5	8	catalytic activity		metabolic process	566	59.3369	5.19873
A5CS01	CMM_1809	GTP pyrophosphokinase OS=Clavibacter michiganensis subsp. michiganensis (strain NCPPB 382) GN=relA PE=3 SV=1 - [A5CS01_CLAM3]	IV.3.8	10.15	1	5	5	8	catalytic activity; metal ion binding		metabolic process	749	83.2152	7.75244
A5CT58	CMM_2213	Uncharacterized protein OS=Clavibacter michiganensis subsp. michiganensis (strain NCPPB 382) GN=CMM_2213 PE=4 SV=1 - [A5CT58_CLAM3]	IV.4.6	46.98	1	5	5	9			response to stimulus	149	15.541	6.52197
A5CUF8	CMM_2662	Uncharacterized protein OS=Clavibacter michiganensis subsp. michiganensis (strain NCPPB 382) GN=CMM_2662 PE=4 SV=1 - [A5CUF8_CLAM3]	V.2.1	18.91	1	4	4	6	catalytic activity		metabolic process	201	21.442	4.85596
A5CV85	CMM_2937	50S ribosomal protein L28 OS=Clavibacter michiganensis subsp. michiganensis (strain NCPPB 382) GN=rpmB PE=3 SV=1 - [RL28_CLAM3]	III.3.1	33.33	1	4	4	8	structural molecule activity	ribosome	metabolic process	78	8.6518	11.0483
A5CUS7	CMM_2780	Uncharacterized protein OS=Clavibacter michiganensis subsp. michiganensis (strain NCPPB 382) GN=CMM_2780 PE=4 SV=1 - [A5CUS7_CLAM3]	V.1.6	25.15	1	4	4	10				330	34.8134	5.14795
A5CR07	CMM_1466	Putative monooxygenase OS=Clavibacter michiganensis subsp. michiganensis (strain NCPPB 382) GN=CMM_1466 PE=4 SV=1 - [A5CR07_CLAM3]	V.1.3	10.53	1	4	4	7	catalytic activity		metabolic process	380	42.5604	5.35107
A5CNG9	CMM_0581	Uncharacterized protein OS=Clavibacter michiganensis subsp. michiganensis (strain NCPPB 382) GN=CMM_0581 PE=4 SV=1 - [A5CNG9_CLAM3]	IV.4.6	43.86	1	4	4	6				57	5.88092	5.40186
A5CR01	CMM_1460	Putative formamidopyrimidine-DNA glycosylase involved in DNA repair OS=Clavibacter michiganensis subsp. michiganensis (strain NCPPB 382) GN=mutM PE=4 SV=1 - [A5CR01_CLAM3]	III.1.4	21.28	1	4	4	6	DNA binding; catalytic activity; metal ion binding		metabolic process; response to stimulus	329	36.3205	7.53271
A5CTA1	CMM_2255	Anti-sigma factor antagonist OS=Clavibacter michiganensis subsp. michiganensis (strain NCPPB 382) GN=CMM_2255 PE=3 SV=1 - [A5CTA1_CLAM3]	IV.3.4	47.32	1	4	4	13	protein binding		regulation of biological process	112	11.9593	7.43018
A5CQH9	CMM_1288	Putative sugar nucleotidyltransferase OS=Clavibacter michiganensis subsp. michiganensis (strain NCPPB 382) GN=CMM_1288 PE=4 SV=1 - [A5CQH9_CLAM3]	II.2.3	23.04	1	4	4	5	catalytic activity		metabolic process	230	25.356	4.80518
A5CU00	CMM_2504	Putative NTP pyrophosphohydrolase OS=Clavibacter michiganensis subsp. michiganensis (strain NCPPB 382) GN=CMM_2504 PE=3 SV=1 - [A5CU00_CLAM3]	III.1.9	20.13	1	4	4	8	catalytic activity		metabolic process	313	33.8466	6.96143
A5CV28	CMM_2880	Uncharacterized protein OS=Clavibacter michiganensis subsp. michiganensis (strain NCPPB 382) GN=CMM_2880 PE=4 SV=1 - [A5CV28_CLAM3]	V.2.1	39.16	1	4	4	8				143	15.394	8.5874
A5CMY5	CMM_0399	Uncharacterized protein OS=Clavibacter michiganensis subsp. michiganensis (strain NCPPB 382) GN=CMM_0399 PE=4 SV=1 - [A5CMY5_CLAM3]	V.2.1	24.25	1	4	4	9				301	31.8768	4.81787
A5CST2	CMM_2090	Putative short chain dehydrogenase/oxidoreductase OS=Clavibacter michiganensis subsp. michiganensis (strain NCPPB 382) GN=CMM_2090 PE=4 SV=1 - [A5CST2_CLAM3]	V.1.3	26.52	1	4	4	13	catalytic activity		metabolic process	230	24.1597	6.15088
A5CNV5	CMM_0716	Putative pyruvyl-transferase OS=Clavibacter michiganensis subsp. michiganensis (strain NCPPB 382) GN=wcnG PE=4 SV=1 - [A5CNV5_CLAM3]	II.2.7	25.5	1	4	4	7	catalytic activity		metabolic process	349	36.6401	7.75244
A5CRH6	CMM_1633	3-methyl-2-oxobutanoate hydroxymethyltransferase OS=Clavibacter michiganensis subsp. michiganensis (strain NCPPB 382) GN=panB PE=3 SV=1 - [A5CRH6_CLAM3]	I.5.1	23.18	1	4	4	5	catalytic activity; metal ion binding	cytoplasm	metabolic process	289	30.4717	5.52881
A5CNH7	CMM_0589	Uncharacterized protein OS=Clavibacter michiganensis subsp. michiganensis (strain NCPPB 382) GN=CMM_0589 PE=4 SV=1 - [A5CNH7_CLAM3]	I.5.7	57.52	1	4	4	14				113	11.657	9.99365
A5CTR6	CMM_2419	Putative ATP-dependent helicase OS=Clavibacter michiganensis subsp. michiganensis (strain NCPPB 382) GN=CMM_2419 PE=4 SV=1 - [A5CTR6_CLAM3]	III.1.1	8.88	1	9	9	9	nucleotide binding; catalytic activity		metabolic process	1272	141.349	6.7417
A5CNJ3	CMM_0605	Putative kinase OS=Clavibacter michiganensis subsp. michiganensis (strain NCPPB 382) GN=CMM_0605 PE=4 SV=1 - [A5CNJ3_CLAM3]	I.5.1	31.91	1	5	5	7	catalytic activity; nucleotide binding; enzyme regulator activity		metabolic process	235	24.3715	5.24951
A5CPQ7	CMM_1017	Putative membrane protein OS=Clavibacter michiganensis subsp. michiganensis (strain NCPPB 382) GN=wcqG PE=4 SV=1 - [A5CPQ7_CLAM3]	II.2.9	10.18	1	4	4	5				737	78.5701	9.78857
A5CM94	CMM_0159	Uncharacterized protein OS=Clavibacter michiganensis subsp. michiganensis (strain NCPPB 382) GN=CMM_0159 PE=4 SV=1 - [A5CM94_CLAM3]	V.2.1	32.43	1	4	4	6	receptor activity; signal transducer activity; nucleotide binding		regulation of biological process; response to stimulus	148	16.6262	5.51611
A5CS39	CMM_1847	Transcriptional repressor NrdR OS=Clavibacter michiganensis subsp. michiganensis (strain NCPPB 382) GN=nrdR PE=3 SV=1 - [NRDR_CLAM3]	IV.3.1	33.12	1	4	4	7	nucleotide binding; DNA binding; metal ion binding		metabolic process; regulation of biological process	157	17.3008	6.02393
A5CS10	CMM_1818	Pyridoxal 5'-phosphate synthase subunit PdxT OS=Clavibacter michiganensis subsp. michiganensis (strain NCPPB 382) GN=pdxT PE=3 SV=1 - [PDXT_CLAM3]	I.5.2	28.71	1	4	4	10	catalytic activity		metabolic process	209	21.8194	5.56689
A5CQN3	CMM_1342	3-isopropylmalate dehydratase small subunit OS=Clavibacter michiganensis subsp. michiganensis (strain NCPPB 382) GN=leuD PE=3 SV=1 - [LEUD_CLAM3]	I.2.5	32.35	1	4	4	6	catalytic activity		metabolic process	204	22.8077	5.10986
A5CQL7	CMM_1326	Putative oxidoreductase OS=Clavibacter michiganensis subsp. michiganensis (strain NCPPB 382) GN=CMM_1326 PE=4 SV=1 - [A5CQL7_CLAM3]	V.1.3	18.11	1	4	4	7	catalytic activity; nucleotide binding		metabolic process	359	38.5542	5.13525
A5CP28	CMM_0789	Putative transcriptional regulator, GntR-family OS=Clavibacter michiganensis subsp. michiganensis (strain NCPPB 382) GN=CMM_0789 PE=4 SV=1 - [A5CP28_CLAM3]	IV.3.1	26.48	1	4	5	6	DNA binding		metabolic process; regulation of biological process	253	27.7516	6.41748
A5CR13	CMM_1474	Putative transcriptional regulator, Cro/CI family OS=Clavibacter michiganensis subsp. michiganensis (strain NCPPB 382) GN=CMM_1474 PE=4 SV=1 - [A5CR13_CLAM3]	IV.3.1	12.21	1	4	4	6	DNA binding			475	52.2106	7.12256
A5CMY3	CMM_0397	Putative ABC transporter, ATP-binding protein OS=Clavibacter michiganensis subsp. michiganensis (strain NCPPB 382) GN=CMM_0397 PE=3 SV=1 - [A5CMY3_CLAM3]	IV.1.1	20.48	1	4	4	8	nucleotide binding; catalytic activity		metabolic process	293	32.0905	4.99561
A5CRC7	CMM_1585	Deoxyguanosinetriphosphate triphosphohydrolase-like protein OS=Clavibacter michiganensis subsp. michiganensis (strain NCPPB 382) GN=dgtA PE=3 SV=1 - [A5CRC7_CLAM3]	I.3.1	12.41	1	4	4	6	metal ion binding; catalytic activity		metabolic process	419	45.9641	5.70654
A5CP29	CMM_0790	Putative sugar ABC transporter ATP-binding protein OS=Clavibacter michiganensis subsp. michiganensis (strain NCPPB 382) GN=CMM_0790 PE=3 SV=1 - [A5CP29_CLAM3]	IV.1.5	19.42	1	4	4	5	nucleotide binding; catalytic activity		metabolic process	309	31.6954	5.80811
A5CNF4	CMM_0566	Putative excinuclease ABC subunit A OS=Clavibacter michiganensis subsp. michiganensis (strain NCPPB 382) GN=CMM_0566 PE=3 SV=1 - [A5CNF4_CLAM3]	III.1.3	8.69	1	4	4	7	nucleotide binding; catalytic activity		metabolic process	829	87.8591	5.45264
A5CUD4	CMM_2638	Uncharacterized protein OS=Clavibacter michiganensis subsp. michiganensis (strain NCPPB 382) GN=CMM_2638 PE=4 SV=1 - [A5CUD4_CLAM3]	V.2.1	42	1	4	4	6				100	11.3675	4.70361
A5CQC3	CMM_1232	Putative dioxygenase OS=Clavibacter michiganensis subsp. michiganensis (strain NCPPB 382) GN=CMM_1232 PE=4 SV=1 - [A5CQC3_CLAM3]	IV.5.7	27.08	1	4	4	9	catalytic activity		metabolic process	325	34.7786	5.16064
A5CV14	CMM_2867	Putative transcriptional regulator, MarR family OS=Clavibacter michiganensis subsp. michiganensis (strain NCPPB 382) GN=CMM_2867 PE=4 SV=1 - [A5CV14_CLAM3]	IV.3.1	32.68	1	4	4	6	DNA binding		metabolic process; regulation of biological process	153	17.1843	6.81494
A5CU65	CMM_2569	Putative SAM-dependant methyltransferase OS=Clavibacter michiganensis subsp. michiganensis (strain NCPPB 382) GN=CMM_2569 PE=4 SV=1 - [A5CU65_CLAM3]	V.1.2	12.25	1	4	4	5	catalytic activity		metabolic process	400	42.318	5.56689
A5CU84	CMM_2588	Translation initiation factor IF-1 OS=Clavibacter michiganensis subsp. michiganensis (strain NCPPB 382) GN=infA PE=3 SV=1 - [IF1_CLAM3]	III.3.3	56.16	1	4	4	10	RNA binding	cytoplasm	metabolic process	73	8.37251	9.46631
A5CSQ3	CMM_2061	Uncharacterized protein OS=Clavibacter michiganensis subsp. michiganensis (strain NCPPB 382) GN=CMM_2061 PE=4 SV=1 - [A5CSQ3_CLAM3]	V.2.1	30.82	1	4	4	8				292	31.3197	4.57666
A5CMJ9	CMM_0263	D-alanine--D-alanine ligase OS=Clavibacter michiganensis subsp. michiganensis (strain NCPPB 382) GN=ddlA PE=3 SV=1 - [A5CMJ9_CLAM3]	II.2.1	23.58	1	4	4	7	nucleotide binding; metal ion binding; catalytic activity	cytoplasm	regulation of biological process; metabolic process; cell organization and biogenesis	335	34.3772	4.93213
A5CRT3	CMM_1740	RNA polymerase-binding protein RbpA OS=Clavibacter michiganensis subsp. michiganensis (strain NCPPB 382) GN=rbpA PE=3 SV=1 - [A5CRT3_CLAM3]	V.2.1	54.1	1	4	4	12	protein binding		metabolic process; regulation of biological process	122	13.2898	6.80029
A5CU22	CMM_2526	Putative MFS permease OS=Clavibacter michiganensis subsp. michiganensis (strain NCPPB 382) GN=CMM_2526 PE=4 SV=1 - [A5CU22_CLAM3]	IV.1.9	8.4	1	3	3	8			transport	488	51.2261	12.0298
A5CRX2	CMM_1779	DNA-directed RNA polymerase subunit omega OS=Clavibacter michiganensis subsp. michiganensis (strain NCPPB 382) GN=rpoZ PE=3 SV=1 - [RPOZ_CLAM3]	III.2.1	40.45	1	3	3	6	DNA binding; catalytic activity		metabolic process	89	9.763	4.62744
A5CP09	CMM_0770	Putative ATP-dependent RNA helicase OS=Clavibacter michiganensis subsp. michiganensis (strain NCPPB 382) GN=CMM_0770 PE=4 SV=1 - [A5CP09_CLAM3]	III.1.9	14.39	1	3	3	3	nucleotide binding; catalytic activity		metabolic process	403	43.4534	8.60205
A5CQ31	CMM_1140	Putative pyridoxamine-phosphate oxidase OS=Clavibacter michiganensis subsp. michiganensis (strain NCPPB 382) GN=CMM_1140 PE=4 SV=1 - [A5CQ31_CLAM3]	I.5.2	23.14	1	3	3	5	catalytic activity; nucleotide binding		metabolic process	229	25.1966	4.83057
A5CN95	CMM_0508	Putative acetyltransferase OS=Clavibacter michiganensis subsp. michiganensis (strain NCPPB 382) GN=CMM_0508 PE=4 SV=1 - [A5CN95_CLAM3]	V.1.4	41.49	1	3	3	5	catalytic activity		metabolic process	94	10.4372	4.94482
A5CUJ1	CMM_2694	Uncharacterized protein OS=Clavibacter michiganensis subsp. michiganensis (strain NCPPB 382) GN=CMM_2694 PE=4 SV=1 - [A5CUJ1_CLAM3]	V.2.1	10.43	1	3	3	3				345	38.6427	5.10986
A5CQE3	CMM_1252	Putative choline/glycine/betaine transporter,BCCT family OS=Clavibacter michiganensis subsp. michiganensis (strain NCPPB 382) GN=CMM_1252 PE=4 SV=1 - [A5CQE3_CLAM3]	IV.1.15	6.57	1	3	3	5	transporter activity	membrane	transport	609	65.8064	6.40479
A5CM87	CMM_0152	Protein GrpE OS=Clavibacter michiganensis subsp. michiganensis (strain NCPPB 382) GN=grpE PE=3 SV=1 - [A5CM87_CLAM3]	IV.4.1	16.59	1	3	3	3	enzyme regulator activity; nucleotide binding; protein binding	cytoplasm	metabolic process; response to stimulus; regulation of biological process	217	23.2295	4.37354
A5CQ24	CMM_1133	Putative enoyl-CoA hydratase OS=Clavibacter michiganensis subsp. michiganensis (strain NCPPB 382) GN=echA PE=4 SV=1 - [A5CQ24_CLAM3]	I.4.1	19.35	1	3	3	5	catalytic activity		metabolic process	279	29.1652	5.92236
A5CLS8	pCM2_0065	Uncharacterized protein OS=Clavibacter michiganensis subsp. michiganensis (strain NCPPB 382) GN=pCM2_0065 PE=4 SV=1 - [A5CLS8_CLAM3]	V.2.2	50.72	1	3	3	5				69	7.49387	7.25439
A5CQI8	CMM_1296	Non-canonical purine NTP pyrophosphatase OS=Clavibacter michiganensis subsp. michiganensis (strain NCPPB 382) GN=CMM_1296 PE=3 SV=1 - [A5CQI8_CLAM3]	I.3.1	30.2	1	3	3	3	nucleotide binding; catalytic activity; metal ion binding		metabolic process	202	21.3049	5.07178
A5CRD5	CMM_1593	Uncharacterized protein OS=Clavibacter michiganensis subsp. michiganensis (strain NCPPB 382) GN=CMM_1593 PE=4 SV=1 - [A5CRD5_CLAM3]	V.2.1	10.45	1	3	3	8	protein binding			335	33.3439	5.40186
A5CLU6	CMM_0014	Para-aminobenzoate synthetase component II OS=Clavibacter michiganensis subsp. michiganensis (strain NCPPB 382) GN=pabA PE=4 SV=1 - [A5CLU6_CLAM3]	I.5.6	21.23	1	3	3	5	catalytic activity		metabolic process	212	22.2352	4.95752
A5CSH0	CMM_1978	Uncharacterized protein OS=Clavibacter michiganensis subsp. michiganensis (strain NCPPB 382) GN=CMM_1978 PE=4 SV=1 - [A5CSH0_CLAM3]	V.2.1	18.23	1	3	3	5		cytoplasm	cell division	203	21.7043	4.81787
A5CQQ1	CMM_1360	Putative acetyltransferase OS=Clavibacter michiganensis subsp. michiganensis (strain NCPPB 382) GN=CMM_1360 PE=4 SV=1 - [A5CQQ1_CLAM3]	V.1.4	13.44	1	3	3	8	catalytic activity		metabolic process	372	40.2114	5.98584
A5CLM1	pCM2_0010	Uncharacterized protein OS=Clavibacter michiganensis subsp. michiganensis (strain NCPPB 382) GN=pCM2_0010 PE=4 SV=1 - [A5CLM1_CLAM3]	V.2.2	15.97	1	3	3	8				144	15.1447	4.85596
A5CSN0	CMM_2038	Putative nucleoside-diphosphate sugar epimerase OS=Clavibacter michiganensis subsp. michiganensis (strain NCPPB 382) GN=CMM_2038 PE=4 SV=1 - [A5CSN0_CLAM3]	I.1.12	15.03	1	3	3	5	catalytic activity		metabolic process	306	32.3752	6.81494
A5CR14	CMM_1471	Putative acetyltransferase, GNAT family OS=Clavibacter michiganensis subsp. michiganensis (strain NCPPB 382) GN=CMM_1471 PE=4 SV=1 - [A5CR14_CLAM3]	V.1.4	28	1	3	3	3	catalytic activity		metabolic process	150	16.7464	5.08447
A5CU60	CMM_2564	Putatice branched-chain amino acid ABC transporter, ATPase component OS=Clavibacter michiganensis subsp. michiganensis (strain NCPPB 382) GN=livG PE=3 SV=1 - [A5CU60_CLAM3]	IV.1.4	10.1	1	3	3	3	nucleotide binding; catalytic activity		metabolic process	307	33.205	5.56689
A5CNX9	CMM_0740	Putative acyltransferase OS=Clavibacter michiganensis subsp. michiganensis (strain NCPPB 382) GN=CMM_0740 PE=4 SV=1 - [A5CNX9_CLAM3]	I.4.3	16.58	1	3	3	3	catalytic activity	cytosol	metabolic process	199	20.7945	6.06201
A5CVC3	CMM_2975	Uncharacterized protein OS=Clavibacter michiganensis subsp. michiganensis (strain NCPPB 382) GN=CMM_2975 PE=3 SV=1 - [A5CVC3_CLAM3]	V.2.1	14.06	1	3	3	3		membrane		320	35.6611	10.1694
A5CPX2	CMM_1082	Uncharacterized protein OS=Clavibacter michiganensis subsp. michiganensis (strain NCPPB 382) GN=CMM_1082 PE=4 SV=1 - [A5CPX2_CLAM3]	IV.5.6	51	1	3	3	11				100	10.6504	4.52588
A5CSP6	CMM_2054	5-methyltetrahydropteroyltriglutamate-homocysteine methyltransferase OS=Clavibacter michiganensis subsp. michiganensis (strain NCPPB 382) GN=metE2 PE=4 SV=1 - [A5CSP6_CLAM3]	I.2.8	9.31	1	3	3	5	catalytic activity; metal ion binding		metabolic process	419	45.6188	5.08447
A5CS89	CMM_1897	NTP pyrophosphohydrolase OS=Clavibacter michiganensis subsp. michiganensis (strain NCPPB 382) GN=CMM_1897 PE=3 SV=1 - [A5CS89_CLAM3]	III.1.9	14.78	1	3	3	5	catalytic activity		metabolic process	318	33.1331	5.5542
A5CSX5	CMM_2129	Uncharacterized protein OS=Clavibacter michiganensis subsp. michiganensis (strain NCPPB 382) GN=CMM_2129 PE=4 SV=1 - [A5CSX5_CLAM3]	V.2.1	16.46	1	3	3	3				243	26.8973	4.60205
A5CSG7	CMM_1975	Cytidylate kinase OS=Clavibacter michiganensis subsp. michiganensis (strain NCPPB 382) GN=cmkA PE=3 SV=1 - [A5CSG7_CLAM3]	I.3.2	13.64	1	3	3	6	nucleotide binding; catalytic activity	cytoplasm	metabolic process	242	25.6918	4.60205
A5CNS7	CMM_0688	Uncharacterized protein OS=Clavibacter michiganensis subsp. michiganensis (strain NCPPB 382) GN=CMM_0688 PE=4 SV=1 - [A5CNS7_CLAM3]	V.2.1	13.92	1	3	3	3				158	16.8795	5.51611
A5CNZ8	CMM_0759	Uncharacterized protein OS=Clavibacter michiganensis subsp. michiganensis (strain NCPPB 382) GN=CMM_0759 PE=4 SV=1 - [A5CNZ8_CLAM3]	V.2.1	71.01	1	3	3	7				69	7.86384	5.45264
A5CPQ5	CMM_1015	Putative glycosyl transferase OS=Clavibacter michiganensis subsp. michiganensis (strain NCPPB 382) GN=wcqE PE=4 SV=1 - [A5CPQ5_CLAM3]	II.2.9	14.87	1	3	3	4	catalytic activity		metabolic process	343	36.9402	6.62451
A5CSI3	CMM_1991	Uncharacterized protein OS=Clavibacter michiganensis subsp. michiganensis (strain NCPPB 382) GN=CMM_1991 PE=4 SV=1 - [A5CSI3_CLAM3]	V.2.1	17.45	1	3	3	6				235	24.2987	8.82178
A5CNA7	CMM_0520	Uncharacterized protein OS=Clavibacter michiganensis subsp. michiganensis (strain NCPPB 382) GN=CMM_0520 PE=4 SV=1 - [A5CNA7_CLAM3]	V.2.1	15.95	1	3	3	9				232	25.6876	4.77979
A5CV82	CMM_2934	Putative DNA-binding protein Hu OS=Clavibacter michiganensis subsp. michiganensis (strain NCPPB 382) GN=hupB PE=3 SV=1 - [A5CV82_CLAM3]	IV.3.5	29.47	1	3	3	16	DNA binding			95	9.67318	9.77393
A5CS02	CMM_1810	Uncharacterized protein OS=Clavibacter michiganensis subsp. michiganensis (strain NCPPB 382) GN=CMM_1810 PE=4 SV=1 - [A5CS02_CLAM3]	V.2.1	48.74	1	2	3	5				119	12.446	5.04639
A5CVA3	CMM_2955	Putative glycosyl transferase OS=Clavibacter michiganensis subsp. michiganensis (strain NCPPB 382) GN=CMM_2955 PE=4 SV=1 - [A5CVA3_CLAM3]	II.2.4	15.93	1	4	4	5	catalytic activity		metabolic process	408	42.0674	6.46826
A5CQW4	CMM_1423	Putative sulfite oxidase OS=Clavibacter michiganensis subsp. michiganensis (strain NCPPB 382) GN=CMM_1423 PE=4 SV=1 - [A5CQW4_CLAM3]	I.2.8	30.39	1	4	4	5			metabolic process	204	23.0236	6.53662
A5CUU0	CMM_2793	UPF0336 protein CMM_2793 OS=Clavibacter michiganensis subsp. michiganensis (strain NCPPB 382) GN=CMM_2793 PE=3 SV=1 - [Y2793_CLAM3]	V.2.1	60.4	1	4	4	10				149	15.4009	5.42725
A5CRU4	CMM_1751	Dephospho-CoA kinase OS=Clavibacter michiganensis subsp. michiganensis (strain NCPPB 382) GN=coaE PE=3 SV=1 - [A5CRU4_CLAM3]	I.5.1	33.82	1	4	4	7	nucleotide binding; catalytic activity	cytoplasm	metabolic process	204	21.5434	4.90674
A5CPT9	CMM_1049	Putative two-component system response regulator OS=Clavibacter michiganensis subsp. michiganensis (strain NCPPB 382) GN=CMM_1049 PE=4 SV=1 - [A5CPT9_CLAM3]	IV.3.2	22.57	1	4	4	7	signal transducer activity; DNA binding		regulation of biological process; response to stimulus; metabolic process	226	24.6769	5.14795
A5CPZ2	CMM_1102	Putative efflux MFS permease OS=Clavibacter michiganensis subsp. michiganensis (strain NCPPB 382) GN=CMM_1102 PE=4 SV=1 - [A5CPZ2_CLAM3]	IV.1.9	10.14	1	4	4	9	transporter activity		transport	513	52.1648	9.74463
A5CT00	CMM_2155	Putative 3-oxoacyl-[acyl-carrier-protein] synthase OS=Clavibacter michiganensis subsp. michiganensis (strain NCPPB 382) GN=CMM_2155 PE=4 SV=1 - [A5CT00_CLAM3]	I.4.1	22.16	1	4	4	5	catalytic activity		metabolic process	343	36.7178	6.01123
A5CUS6	CMM_2779	Putative carboxylesterase OS=Clavibacter michiganensis subsp. michiganensis (strain NCPPB 382) GN=CMM_2779 PE=4 SV=1 - [A5CUS6_CLAM3]	V.1.6	11.66	1	4	4	6				403	41.9466	5.40186
A5CR44	CMM_1503	Putative 1-phosphofructokinase OS=Clavibacter michiganensis subsp. michiganensis (strain NCPPB 382) GN=fruK PE=4 SV=1 - [A5CR44_CLAM3]	IV.1.20	26.32	1	4	4	7	nucleotide binding; catalytic activity		metabolic process	323	32.8753	5.2749
A5CM68	CMM_0133	Pyrrolidone-carboxylate peptidase OS=Clavibacter michiganensis subsp. michiganensis (strain NCPPB 382) GN=pcp PE=3 SV=1 - [PCP_CLAM3]	IV.7.4	29.58	1	4	4	6	catalytic activity	cytoplasm; cytosol	metabolic process	213	22.7965	4.66553
A5CSG8	CMM_1976	Putative prephenate dehydrogenase OS=Clavibacter michiganensis subsp. michiganensis (strain NCPPB 382) GN=CMM_1976 PE=4 SV=1 - [A5CSG8_CLAM3]	I.2.7	20.95	1	4	4	7	catalytic activity		metabolic process	358	36.9776	5.2749
A5CMF5	CMM_0219	Uncharacterized protein OS=Clavibacter michiganensis subsp. michiganensis (strain NCPPB 382) GN=CMM_0219 PE=4 SV=1 - [A5CMF5_CLAM3]	I.2.8	67.68	1	4	4	7				99	10.1961	4.70361
A5CQA0	CMM_1209	Octanoyltransferase OS=Clavibacter michiganensis subsp. michiganensis (strain NCPPB 382) GN=lipB PE=3 SV=1 - [LIPB_CLAM3]	I.5.10	18.45	1	3	3	6	catalytic activity	cytoplasm	metabolic process	233	24.767	7.12256
A5CSM1	CMM_2031	Putative ABC transporter, permease component OS=Clavibacter michiganensis subsp. michiganensis (strain NCPPB 382) GN=CMM_2031 PE=4 SV=1 - [A5CSM1_CLAM3]	IV.1.1	12.2	1	3	3	4		membrane		410	42.8466	5.04639
A5CRA8	CMM_1566	Ribosomal RNA small subunit methyltransferase E OS=Clavibacter michiganensis subsp. michiganensis (strain NCPPB 382) GN=CMM_1566 PE=3 SV=1 - [A5CRA8_CLAM3]	III.3.4	14.68	1	3	3	4	catalytic activity	cytoplasm	metabolic process	252	26.2422	6.82959
A5CRE5	CMM_1603	Putative pyruvyltransferase OS=Clavibacter michiganensis subsp. michiganensis (strain NCPPB 382) GN=wcmJ PE=4 SV=1 - [A5CRE5_CLAM3]	II.2.10	13.5	1	3	3	5	catalytic activity		metabolic process	311	34.594	6.66846
A5CLK9	pCM1_0026	Uncharacterized protein OS=Clavibacter michiganensis subsp. michiganensis (strain NCPPB 382) GN=pCM1_0026 PE=4 SV=1 - [A5CLK9_CLAM3]	V.2.1	27.78	1	3	3	5				90	10.3843	5.79541
A5CLJ1	pCM1_0008	Uncharacterized protein OS=Clavibacter michiganensis subsp. michiganensis (strain NCPPB 382) GN=pCM1_0008 PE=4 SV=1 - [A5CLJ1_CLAM3]	IV.3.1	38	1	3	3	4			regulation of biological process	100	11.3789	7.1958
A5CS38	CMM_1846	Dihydroorotate dehydrogenase (quinone) OS=Clavibacter michiganensis subsp. michiganensis (strain NCPPB 382) GN=pyrD PE=3 SV=1 - [PYRD_CLAM3]	I.3.2	13.08	1	3	3	4	catalytic activity	membrane	metabolic process	344	36.3956	9.5249
A5CV12	CMM_2865	Endonuclease NucS OS=Clavibacter michiganensis subsp. michiganensis (strain NCPPB 382) GN=nucS PE=3 SV=1 - [A5CV12_CLAM3]	V.2.1	15.58	1	3	3	4	DNA binding; catalytic activity	cytoplasm	metabolic process	231	25.4631	5.90967
A5CTW6	CMM_2471	Putative cold shock protein OS=Clavibacter michiganensis subsp. michiganensis (strain NCPPB 382) GN=cspB PE=4 SV=1 - [A5CTW6_CLAM3]	IV.4.3	46.46	1	3	3	7	DNA binding	cytoplasm	regulation of biological process	127	13.5011	7.41553
A5CUM1	CMM_2724	Anti-sigma factor antagonist OS=Clavibacter michiganensis subsp. michiganensis (strain NCPPB 382) GN=CMM_2724 PE=3 SV=1 - [A5CUM1_CLAM3]	IV.3.4	41.07	1	3	3	11	protein binding		regulation of biological process	112	11.601	4.80518
A5CUY6	CMM_2839	Uncharacterized protein OS=Clavibacter michiganensis subsp. michiganensis (strain NCPPB 382) GN=CMM_2839 PE=4 SV=1 - [A5CUY6_CLAM3]	V.2.1	15.92	1	3	3	4				289	30.5225	4.7417
A5CPN3	CMM_0993	Maf-like protein CMM_0993 OS=Clavibacter michiganensis subsp. michiganensis (strain NCPPB 382) GN=CMM_0993 PE=3 SV=1 - [A5CPN3_CLAM3]	II.1.1	17.49	1	3	3	5		cytoplasm		223	23.4124	5.42725
A5CQZ5	CMM_1454	Uncharacterized protein OS=Clavibacter michiganensis subsp. michiganensis (strain NCPPB 382) GN=CMM_1454 PE=4 SV=1 - [A5CQZ5_CLAM3]	V.2.1	16.88	1	3	3	7				231	23.6505	5.42725
A5CMH8	CMM_0242	Methylated-DNA--protein-cysteine methyltransferase OS=Clavibacter michiganensis subsp. michiganensis (strain NCPPB 382) GN=ogtA PE=3 SV=1 - [A5CMH8_CLAM3]	III.1.5	18.27	1	3	3	7	catalytic activity	cytoplasm	metabolic process; response to stimulus	208	22.5609	7.31299
A5CS51	CMM_1859	UDP-N-acetylglucosamine--N-acetylmuramyl-(pentapeptide) pyrophosphoryl-undecaprenol N-acetylglucosamine transferase OS=Clavibacter michiganensis subsp. michiganensis (strain NCPPB 382) GN=murG PE=3 SV=1 - [MURG_CLAM3]	II.2.1	16.35	1	3	3	5	catalytic activity	membrane	metabolic process; regulation of biological process; cell division; cell organization and biogenesis	367	37.6912	10.1108
A5CTF7	CMM_2311	Molybdopterin cofactor biosynthesis protein OS=Clavibacter michiganensis subsp. michiganensis (strain NCPPB 382) GN=moaE PE=4 SV=1 - [A5CTF7_CLAM3]	I.5.9	27.27	1	3	3	5			metabolic process	143	15.3308	5.5415
A5CM02	CMM_0067	Putative ATPase OS=Clavibacter michiganensis subsp. michiganensis (strain NCPPB 382) GN=CMM_0067 PE=4 SV=1 - [A5CM02_CLAM3]	V.1.5	9.77	1	3	3	4	nucleotide binding; catalytic activity		metabolic process	389	42.0347	5.43994
A5CNN0	CMM_0641	Uncharacterized protein OS=Clavibacter michiganensis subsp. michiganensis (strain NCPPB 382) GN=CMM_0641 PE=4 SV=1 - [A5CNN0_CLAM3]	V.2.2	44.87	1	3	3	4				78	9.02651	4.51318
A5CPC7	CMM_0888	Uncharacterized protein OS=Clavibacter michiganensis subsp. michiganensis (strain NCPPB 382) GN=CMM_0888 PE=3 SV=1 - [A5CPC7_CLAM3]	I.2.8	14.53	1	3	3	4	catalytic activity		metabolic process	351	36.5086	5.38916
A5CT13	CMM_2168	MoxR-like ATPase, putative regulator OS=Clavibacter michiganensis subsp. michiganensis (strain NCPPB 382) GN=CMM_2168 PE=4 SV=1 - [A5CT13_CLAM3]	IV.3.6	15.85	1	3	3	8	DNA binding; nucleotide binding; protein binding; catalytic activity		metabolic process; regulation of biological process	347	36.701	6.01123
A5CQI7	CMM_1295	Ribonuclease PH OS=Clavibacter michiganensis subsp. michiganensis (strain NCPPB 382) GN=rphA PE=3 SV=1 - [A5CQI7_CLAM3]	III.2.2	19.18	1	3	3	9	RNA binding; catalytic activity		metabolic process	245	26.2464	5.38916
A5CNP7	CMM_0658	Putative endoribonuclease L-PSP OS=Clavibacter michiganensis subsp. michiganensis (strain NCPPB 382) GN=CMM_0658 PE=4 SV=1 - [A5CNP7_CLAM3]	III.3.4	32.95	1	3	3	6				173	17.8312	4.85596
A5CUG9	CMM_2672	Putative antibiotic immunity protein, peptidase family S66 OS=Clavibacter michiganensis subsp. michiganensis (strain NCPPB 382) GN=CMM_2672 PE=4 SV=1 - [A5CUG9_CLAM3]	IV.7.3	16.13	1	3	3	6				372	39.9846	6.25244
A5CP33	CMM_0794	Putative sugar epimerase OS=Clavibacter michiganensis subsp. michiganensis (strain NCPPB 382) GN=CMM_0794 PE=4 SV=1 - [A5CP33_CLAM3]	I.1.12	12.79	1	3	3	4	catalytic activity		metabolic process	305	32.1672	4.70361
A5CPG8	CMM_0928	Thymidylate kinase OS=Clavibacter michiganensis subsp. michiganensis (strain NCPPB 382) GN=tmk PE=3 SV=1 - [KTHY_CLAM3]	I.3.3	16.11	1	3	3	4	nucleotide binding; catalytic activity		metabolic process	211	22.8701	5.65576
A5CSI1	CMM_1989	Uncharacterized protein OS=Clavibacter michiganensis subsp. michiganensis (strain NCPPB 382) GN=CMM_1989 PE=4 SV=1 - [A5CSI1_CLAM3]	V.2.1	13.5	1	3	3	5	protein binding			326	35.0327	4.28467
A5CN36	CMM_0450	Uncharacterized protein OS=Clavibacter michiganensis subsp. michiganensis (strain NCPPB 382) GN=CMM_0450 PE=4 SV=1 - [A5CN36_CLAM3]	V.1.3	22.01	1	3	3	8	catalytic activity		metabolic process	209	21.8614	6.354
A5CP81	CMM_0842	tRNA(Ile)-lysidine synthase OS=Clavibacter michiganensis subsp. michiganensis (strain NCPPB 382) GN=tilS PE=3 SV=1 - [A5CP81_CLAM3]	II.1.2	13.78	1	3	3	6	nucleotide binding; catalytic activity	cytoplasm	metabolic process	341	35.2997	6.06201
A5CRY6	CMM_1793	Elongation factor P OS=Clavibacter michiganensis subsp. michiganensis (strain NCPPB 382) GN=efp PE=3 SV=1 - [EFP_CLAM3]	III.3.3	32.09	1	3	3	16	RNA binding	cytoplasm	metabolic process	187	20.4563	5.10986
A5CPE6	CMM_0907	Thymidine kinase OS=Clavibacter michiganensis subsp. michiganensis (strain NCPPB 382) GN=tdkA PE=3 SV=1 - [A5CPE6_CLAM3]	I.3.2	18.75	1	3	3	7	nucleotide binding; catalytic activity		metabolic process	224	24.6985	5.33838
A5CV70	CMM_2921	Uncharacterized protein OS=Clavibacter michiganensis subsp. michiganensis (strain NCPPB 382) GN=CMM_2921 PE=4 SV=1 - [A5CV70_CLAM3]	V.2.1	25.32	1	3	3	10				237	23.6533	4.22119
A5CVC0	CMM_2972	Putative chromosome partitioning protein OS=Clavibacter michiganensis subsp. michiganensis (strain NCPPB 382) GN=parA PE=4 SV=1 - [A5CVC0_CLAM3]	II.1.2	22.87	1	3	3	6	nucleotide binding; catalytic activity		metabolic process	293	31.7015	5.35107
A5CNF5	CMM_0567	RNA polymerase sigma factor OS=Clavibacter michiganensis subsp. michiganensis (strain NCPPB 382) GN=sigB PE=3 SV=1 - [A5CNF5_CLAM3]	IV.3.4	21.61	1	2	3	7	DNA binding		metabolic process; regulation of biological process	347	38.7141	5.35107
A5CUZ3	CMM_2846	Putative plasmid maintenance system, antidote protein OS=Clavibacter michiganensis subsp. michiganensis (strain NCPPB 382) GN=CMM_2846 PE=4 SV=1 - [A5CUZ3_CLAM3]	II.1.2	7.08	1	2	2	2	DNA binding			367	40.4338	6.37939
A5CSX8	CMM_2133	Putative lipase/esterase OS=Clavibacter michiganensis subsp. michiganensis (strain NCPPB 382) GN=CMM_2133 PE=4 SV=1 - [A5CSX8_CLAM3]	V.1.6	9.43	1	2	2	2	catalytic activity		metabolic process	212	22.0042	4.91943
A5CNQ7	CMM_0668	Uncharacterized protein OS=Clavibacter michiganensis subsp. michiganensis (strain NCPPB 382) GN=CMM_0668 PE=4 SV=1 - [A5CNQ7_CLAM3]	V.2.1	16.02	1	2	2	2	catalytic activity; metal ion binding		metabolic process	206	22.0443	5.40186
A5CQP1	CMM_1350	Putative DNA methylase OS=Clavibacter michiganensis subsp. michiganensis (strain NCPPB 382) GN=CMM_1350 PE=4 SV=1 - [A5CQP1_CLAM3]	III.1.5	11.82	1	2	2	2	catalytic activity		metabolic process	203	21.321	5.19873
A5CTN7	CMM_2391	Ribosomal RNA small subunit methyltransferase I OS=Clavibacter michiganensis subsp. michiganensis (strain NCPPB 382) GN=rsmI PE=3 SV=1 - [A5CTN7_CLAM3]	V.1.1	10.7	1	2	2	2	catalytic activity	cytoplasm	metabolic process	271	28.8824	5.42725
A5CM96	CMM_0161	Putative transcriptional regulator, LacI-family OS=Clavibacter michiganensis subsp. michiganensis (strain NCPPB 382) GN=CMM_0161 PE=4 SV=1 - [A5CM96_CLAM3]	IV.3.1	11.11	1	2	2	4	DNA binding		metabolic process; regulation of biological process	342	35.2865	7.62061
A5CPL2	CMM_0972	Succinate dehydrogenase, cytochrome b subunit OS=Clavibacter michiganensis subsp. michiganensis (strain NCPPB 382) GN=sdhC PE=4 SV=1 - [A5CPL2_CLAM3]	I.1.3	15.28	1	2	2	4	catalytic activity		metabolic process	144	16.1347	10.4038
A5CRZ4	CMM_1801	Putative Holliday junction resolvase OS=Clavibacter michiganensis subsp. michiganensis (strain NCPPB 382) GN=CMM_1801 PE=3 SV=1 - [RUVX_CLAM3]	III.1.7	14.29	1	2	2	4	catalytic activity	cytoplasm	metabolic process; response to stimulus	161	16.8331	9.0415
A5CRU9	CMM_1756	Uncharacterized protein OS=Clavibacter michiganensis subsp. michiganensis (strain NCPPB 382) GN=CMM_1756 PE=4 SV=1 - [A5CRU9_CLAM3]	V.2.1	17.36	1	2	2	4				144	15.1697	7.04932
A5CQQ7	CMM_1366	Putative glutamate--cysteine ligase 2 OS=Clavibacter michiganensis subsp. michiganensis (strain NCPPB 382) GN=CMM_1366 PE=3 SV=1 - [GCS2_CLAM3]	I.2.10	6.01	1	2	2	2	nucleotide binding; catalytic activity		metabolic process	383	42.2822	5.14795
A5CPW2	CMM_1072	Putative hydrolase/acyltransferase OS=Clavibacter michiganensis subsp. michiganensis (strain NCPPB 382) GN=CMM_1072 PE=4 SV=1 - [A5CPW2_CLAM3]	V.1.6	8.82	1	2	2	4	catalytic activity		metabolic process	272	28.4326	6.52197
A5CNZ4	CMM_0755	Uncharacterized protein OS=Clavibacter michiganensis subsp. michiganensis (strain NCPPB 382) GN=CMM_0755 PE=4 SV=1 - [A5CNZ4_CLAM3]	V.2.1	25.4	1	2	2	2				126	13.0108	6.53662
A5CRB8	CMM_1579	Isoprenyl transferase OS=Clavibacter michiganensis subsp. michiganensis (strain NCPPB 382) GN=uppS1 PE=3 SV=1 - [A5CRB8_CLAM3]	II.2.2	16.32	1	2	2	2	metal ion binding; catalytic activity		metabolic process	288	32.4882	5.74463
A5CPL8	CMM_0978	Putative sugar ABC transporter, permease component OS=Clavibacter michiganensis subsp. michiganensis (strain NCPPB 382) GN=CMM_0978 PE=4 SV=1 - [A5CPL8_CLAM3]	IV.1.5	4.8	1	2	2	2	transporter activity	membrane	transport	458	46.83	9.17334
A5CSK4	CMM_2012	Uncharacterized protein OS=Clavibacter michiganensis subsp. michiganensis (strain NCPPB 382) GN=CMM_2012 PE=4 SV=1 - [A5CSK4_CLAM3]	V.2.1	33.54	1	2	2	2				161	16.432	4.57666
A5CR39	CMM_1498	Uncharacterized protein OS=Clavibacter michiganensis subsp. michiganensis (strain NCPPB 382) GN=CMM_1498 PE=4 SV=1 - [A5CR39_CLAM3]	V.2.1	27.54	1	2	2	2				138	15.3232	5.21143
A5CS07	CMM_1815	Holliday junction ATP-dependent DNA helicase RuvA OS=Clavibacter michiganensis subsp. michiganensis (strain NCPPB 382) GN=ruvA PE=3 SV=1 - [RUVA_CLAM3]	III.1.7	10.75	1	2	2	4	nucleotide binding; DNA binding; catalytic activity		metabolic process; response to stimulus; cell communication	214	21.9136	5.90967
A5CQ15	CMM_1127	Putative Asp/Glu-tRNA amidotransferase OS=Clavibacter michiganensis subsp. michiganensis (strain NCPPB 382) GN=CMM_1127 PE=4 SV=1 - [A5CQ15_CLAM3]	III.3.4	5.26	1	2	2	2	catalytic activity		metabolic process	475	50.7682	5.24951
A5CP91	CMM_0852	Uncharacterized protein OS=Clavibacter michiganensis subsp. michiganensis (strain NCPPB 382) GN=CMM_0852 PE=4 SV=1 - [A5CP91_CLAM3]	V.2.1	9.49	1	2	2	2				253	25.3384	4.89404
A5CQ55	CMM_1163	ATP synthase subunit a OS=Clavibacter michiganensis subsp. michiganensis (strain NCPPB 382) GN=atpB PE=3 SV=1 - [A5CQ55_CLAM3]	IV.1.18	7.09	1	2	2	4	transporter activity; catalytic activity	membrane	metabolic process; transport	282	30.798	6.94678
A5CNW9	CMM_0730	Putative Phosphoribosylformylglycinamidine (FGAM) synthase OS=Clavibacter michiganensis subsp. michiganensis (strain NCPPB 382) GN=purS PE=4 SV=1 - [A5CNW9_CLAM3]	I.3.1	13.08	1	2	2	2	nucleotide binding; catalytic activity	cytoplasm	metabolic process	130	13.3517	4.61475
A5CP87	CMM_0848	2-amino-4-hydroxy-6-hydroxymethyldihydropteridine pyrophosphokinase/dihydroneopterin aldolase OS=Clavibacter michiganensis subsp. michiganensis (strain NCPPB 382) GN=folBK PE=4 SV=1 - [A5CP87_CLAM3]	I.5.6	10.47	1	2	2	2	catalytic activity		metabolic process	296	31.2806	5.021
A5CRM8	CMM_1687	Sec-independent protein translocase protein TatA OS=Clavibacter michiganensis subsp. michiganensis (strain NCPPB 382) GN=tatA PE=3 SV=1 - [A5CRM8_CLAM3]	IV.2.2	11.4	1	2	2	2	transporter activity	membrane	transport	114	13.0306	7.26904
A5CS91	CMM_1899	Putative Zinc-dependant dehydrogenase OS=Clavibacter michiganensis subsp. michiganensis (strain NCPPB 382) GN=CMM_1899 PE=4 SV=1 - [A5CS91_CLAM3]	V.1.3	10.06	1	2	2	2	metal ion binding; catalytic activity		metabolic process	338	35.5972	5.66846
A5CQL2	CMM_1321	Putative acetyl transferase OS=Clavibacter michiganensis subsp. michiganensis (strain NCPPB 382) GN=CMM_1321 PE=4 SV=1 - [A5CQL2_CLAM3]	V.1.4	13.01	1	2	2	4	catalytic activity		metabolic process	146	15.8902	6.37939
A5CRN2	CMM_1689	Putative transcriptional regulator OS=Clavibacter michiganensis subsp. michiganensis (strain NCPPB 382) GN=CMM_1689 PE=4 SV=1 - [A5CRN2_CLAM3]	IV.3.1	8.66	1	2	2	2				335	37.2225	6.68311
A5CUC9	CMM_2633	Uncharacterized protein OS=Clavibacter michiganensis subsp. michiganensis (strain NCPPB 382) GN=CMM_2633 PE=4 SV=1 - [A5CUC9_CLAM3]	V.2.1	13.33	1	2	2	2				285	30.5279	6.75635
A5CTS3	CMM_2427	Putative acetyltransferase OS=Clavibacter michiganensis subsp. michiganensis (strain NCPPB 382) GN=CMM_2427 PE=4 SV=1 - [A5CTS3_CLAM3]	V.1.4	5.65	1	2	2	2	catalytic activity		metabolic process	177	19.4639	5.31299
A5CU37	CMM_2541	Putative ABC transporter, fused permease and ATP-binding protein OS=Clavibacter michiganensis subsp. michiganensis (strain NCPPB 382) GN=CMM_2541 PE=3 SV=1 - [A5CU37_CLAM3]	IV.1.8	4.82	1	2	2	2	nucleotide binding; catalytic activity; transporter activity		metabolic process; transport	602	65.1949	7.32764
A5CQI2	CMM_1291	Uncharacterized protein OS=Clavibacter michiganensis subsp. michiganensis (strain NCPPB 382) GN=CMM_1291 PE=4 SV=1 - [A5CQI2_CLAM3]	V.2.1	21.05	1	2	2	4				95	10.6434	5.2749
A5CLV2	CMM_0020	Uncharacterized protein OS=Clavibacter michiganensis subsp. michiganensis (strain NCPPB 382) GN=CMM_0020 PE=4 SV=1 - [A5CLV2_CLAM3]	V.2.1	21.13	1	2	2	2	protein binding			194	20.808	9.59814
A5CVA5	CMM_2957	Peptide chain release factor 3 OS=Clavibacter michiganensis subsp. michiganensis (strain NCPPB 382) GN=prfC PE=3 SV=1 - [A5CVA5_CLAM3]	III.3.3	5.73	1	2	2	2	nucleotide binding; catalytic activity; RNA binding	cytoplasm	metabolic process; cell organization and biogenesis; regulation of biological process	541	59.0831	6.20166
A5CRF1	CMM_1609	Putative undecaprenyl-phosphate glycosyl-1-phosphate transfe OS=Clavibacter michiganensis subsp. michiganensis (strain NCPPB 382) GN=wcmN PE=4 SV=1 - [A5CRF1_CLAM3]	II.2.10	5.57	1	2	2	2	catalytic activity		metabolic process	521	57.6621	9.74463
A5CRM1	CMM_1678	Putative mutT-like protein OS=Clavibacter michiganensis subsp. michiganensis (strain NCPPB 382) GN=CMM_1678 PE=3 SV=1 - [A5CRM1_CLAM3]	III.1.9	23.72	1	2	2	2	catalytic activity		metabolic process	156	17.7709	4.67822
A5CT02	CMM_2157	Putative zinc metalloprotease, family M50 OS=Clavibacter michiganensis subsp. michiganensis (strain NCPPB 382) GN=CMM_2157 PE=4 SV=1 - [A5CT02_CLAM3]	IV.7.1	6.36	1	2	2	2	catalytic activity; protein binding; metal ion binding	membrane	metabolic process	472	48.4394	5.33838
A5CQV5	CMM_1414	Putative acyl-CoA synthatase OS=Clavibacter michiganensis subsp. michiganensis (strain NCPPB 382) GN=CMM_1414 PE=4 SV=1 - [A5CQV5_CLAM3]	I.4.1	5.52	1	2	2	2	catalytic activity		metabolic process	562	60.3778	5.45264
A5CPG9	CMM_0929	DNA polymerase III, delta' subunit OS=Clavibacter michiganensis subsp. michiganensis (strain NCPPB 382) GN=holB PE=4 SV=1 - [A5CPG9_CLAM3]	III.1.2	6.76	1	2	2	2	catalytic activity; nucleotide binding		metabolic process	414	43.9261	6.82959
A5CQM0	CMM_1329	Uncharacterized protein OS=Clavibacter michiganensis subsp. michiganensis (strain NCPPB 382) GN=CMM_1329 PE=4 SV=1 - [A5CQM0_CLAM3]	V.2.1	37.14	1	2	2	2				105	10.9776	4.66553
A5CQ98	CMM_1207	Putative transcriptional regulator, PadR family OS=Clavibacter michiganensis subsp. michiganensis (strain NCPPB 382) GN=CMM_1207 PE=4 SV=1 - [A5CQ98_CLAM3]	IV.3.1	11.05	1	2	2	6				190	20.1562	6.0874
A5CQV1	CMM_1410	Putative ABC transporter ATP-binding protein OS=Clavibacter michiganensis subsp. michiganensis (strain NCPPB 382) GN=CMM_1410 PE=3 SV=1 - [A5CQV1_CLAM3]	IV.1.1	3.49	1	2	2	2	nucleotide binding; catalytic activity		metabolic process	545	58.2082	5.2749
A5CU16	CMM_2520	Putative acetyltransferase/ siderophore binding protein OS=Clavibacter michiganensis subsp. michiganensis (strain NCPPB 382) GN=CMM_2520 PE=4 SV=1 - [A5CU16_CLAM3]	V.1.4	16.92	1	2	2	4	catalytic activity		metabolic process	201	20.4056	5.33838
A5CUZ5	CMM_2848	Putative short chain dehydrogenase/oxidoreductase OS=Clavibacter michiganensis subsp. michiganensis (strain NCPPB 382) GN=CMM_2848 PE=3 SV=1 - [A5CUZ5_CLAM3]	V.1.3	12.4	1	2	2	2	catalytic activity		metabolic process	250	25.3809	5.03369
A5CPH7	CMM_0937	Putative multidrug export ABC transporter, fused permease and ATP-binding protein OS=Clavibacter michiganensis subsp. michiganensis (strain NCPPB 382) GN=CMM_0937 PE=3 SV=1 - [A5CPH7_CLAM3]	IV.1.8	6.38	1	2	2	4	nucleotide binding; catalytic activity; transporter activity		metabolic process; transport	643	67.4595	5.57959
A5CQG6	CMM_1275	Putative aminotransferase OS=Clavibacter michiganensis subsp. michiganensis (strain NCPPB 382) GN=CMM_1275 PE=4 SV=1 - [A5CQG6_CLAM3]	I.2.1	7.48	1	2	2	2	catalytic activity		metabolic process	401	42.4004	5.56689
A5CT93	CMM_2248	Uncharacterized protein OS=Clavibacter michiganensis subsp. michiganensis (strain NCPPB 382) GN=CMM_2248 PE=4 SV=1 - [A5CT93_CLAM3]	V.2.1	13.83	1	2	2	4				188	20.965	5.37646
A5CVA7	CMM_2959	Putative replicative DNA helicase OS=Clavibacter michiganensis subsp. michiganensis (strain NCPPB 382) GN=dnaB PE=4 SV=1 - [A5CVA7_CLAM3]	III.1.1	4.58	1	2	2	4	DNA binding; catalytic activity; nucleotide binding		metabolic process	459	49.6146	5.56689
A5CTY1	CMM_2486	Uncharacterized protein OS=Clavibacter michiganensis subsp. michiganensis (strain NCPPB 382) GN=CMM_2486 PE=4 SV=1 - [A5CTY1_CLAM3]	V.2.1	5.53	1	2	2	2	nucleotide binding; catalytic activity	membrane	metabolic process	434	49.1514	5.05908
A5CVA2	CMM_2954	Putative glycerate kinase OS=Clavibacter michiganensis subsp. michiganensis (strain NCPPB 382) GN=CMM_2954 PE=3 SV=1 - [A5CVA2_CLAM3]	I.1.5	8.63	1	2	2	2	catalytic activity		metabolic process	371	36.2401	5.41455
A5CTJ1	CMM_2345	Putative transcriptional regulator involved in molybdate uptake OS=Clavibacter michiganensis subsp. michiganensis (strain NCPPB 382) GN=CMM_2345 PE=4 SV=1 - [A5CTJ1_CLAM3]	IV.3.1	21.76	1	2	2	4	transporter activity; nucleotide binding; catalytic activity		transport	170	17.4582	5.65576
A5CMF9	CMM_0223	Putative phosphatase OS=Clavibacter michiganensis subsp. michiganensis (strain NCPPB 382) GN=CMM_0223 PE=4 SV=1 - [A5CMF9_CLAM3]	V.1.6	12.33	1	2	2	4	catalytic activity		metabolic process	219	22.709	5.0083
A5CQU8	CMM_1407	Aspartyl/glutamyl-tRNA(Asn/Gln) amidotransferase subunit C OS=Clavibacter michiganensis subsp. michiganensis (strain NCPPB 382) GN=gatC PE=3 SV=1 - [A5CQU8_CLAM3]	III.3.2	16.39	1	2	2	5	nucleotide binding; catalytic activity		metabolic process; regulation of biological process	122	12.8365	4.50049
A5CQ65	CMM_1174	Transcriptional regulatory protein, AsnC family OS=Clavibacter michiganensis subsp. michiganensis (strain NCPPB 382) GN=CMM_1174 PE=4 SV=1 - [A5CQ65_CLAM3]	IV.3.1	18.24	1	2	2	6	DNA binding		metabolic process; regulation of biological process	159	17.159	5.21143
A5CQZ4	CMM_1453	Putative acyl-CoA thioesterase II OS=Clavibacter michiganensis subsp. michiganensis (strain NCPPB 382) GN=tesB PE=4 SV=1 - [A5CQZ4_CLAM3]	I.4.1	9.63	1	2	2	2	catalytic activity		metabolic process	301	33.1824	6.22705
A5CPB2	CMM_0871	Uncharacterized protein OS=Clavibacter michiganensis subsp. michiganensis (strain NCPPB 382) GN=CMM_0871 PE=4 SV=1 - [A5CPB2_CLAM3]	V.2.1	15.79	1	2	2	3				247	26.5153	5.69385
A5CSQ6	CMM_2064	Uncharacterized protein OS=Clavibacter michiganensis subsp. michiganensis (strain NCPPB 382) GN=CMM_2064 PE=4 SV=1 - [A5CSQ6_CLAM3]	V.2.1	62.32	1	2	2	8				69	7.47272	8.44092
A5CQ51	CMM_1160	Uncharacterized protein OS=Clavibacter michiganensis subsp. michiganensis (strain NCPPB 382) GN=CMM_1160 PE=4 SV=1 - [A5CQ51_CLAM3]	V.2.1	13.27	1	2	2	4	RNA binding			309	31.628	4.37354

## Sheet: Table S4. M9 and XMM
Accession	Gene Name	Description	COG	ΣCoverage	Σ# Proteins	Σ# Unique Peptides	Σ# Peptides	Σ# PSMs	Molecular Function	Cellular Component	Biological Process	# AAs	MW [kDa]	calc. pI
A5CT14	CMM_2169	Putative RTX toxin OS=Clavibacter michiganensis subsp. michiganensis (strain NCPPB 382) GN=CMM_2169 PE=4 SV=1 - [A5CT14_CLAM3]	II.2.5	50.75	1	61	61	187	protein binding			2004	204.52	4.66553
A5CUC6	CMM_2630	DNA-directed RNA polymerase subunit beta' OS=Clavibacter michiganensis subsp. michiganensis (strain NCPPB 382) GN=rpoC PE=3 SV=1 - [RPOC_CLAM3]	III.2.1	55.58	1	70	70	355	DNA binding; catalytic activity		metabolic process	1299	143.177	6.56592
A5CQL3	CMM_1322	2-oxoglutarate dehydrogenase E1 component OS=Clavibacter michiganensis subsp. michiganensis (strain NCPPB 382) GN=sucA PE=4 SV=1 - [A5CQL3_CLAM3]	I.1.3	63.76	1	59	59	360	catalytic activity		metabolic process	1272	139.893	5.89697
A5CU32	CMM_2536	Putative subtilisin-like serine protease,peptidase family S8 OS=Clavibacter michiganensis subsp. michiganensis (strain NCPPB 382) GN=sbtC PE=3 SV=1 - [A5CU32_CLAM3]	IV.6.1	61.22	1	52	52	950	catalytic activity; protein binding		metabolic process; regulation of biological process	1199	119.837	5.60498
A5CUC7	CMM_2631	DNA-directed RNA polymerase subunit beta OS=Clavibacter michiganensis subsp. michiganensis (strain NCPPB 382) GN=rpoB PE=3 SV=1 - [RPOB_CLAM3]	III.2.1	53.01	1	54	54	296	DNA binding; catalytic activity		metabolic process	1162	128.519	5.13525
A5CRG4	CMM_1621	Pyruvate dehydrogenase E1 component OS=Clavibacter michiganensis subsp. michiganensis (strain NCPPB 382) GN=aceE PE=4 SV=1 - [A5CRG4_CLAM3]	I.1.3	67.51	1	48	48	330	catalytic activity		metabolic process	908	100.914	5.60498
A5CLP6	pCM2_0035	Putative rhs related protein OS=Clavibacter michiganensis subsp. michiganensis (strain NCPPB 382) GN=rhsA PE=4 SV=1 - [A5CLP6_CLAM3]	II.2.5	69.14	1	55	55	475			metabolic process	1134	118.653	5.61768
A5CUB7	CMM_2621	Elongation factor G OS=Clavibacter michiganensis subsp. michiganensis (strain NCPPB 382) GN=fusA PE=3 SV=1 - [EFG_CLAM3]	III.3.3	72.87	1	48	48	669	nucleotide binding; RNA binding; catalytic activity	cytoplasm	metabolic process	704	77.4225	5.14795
A5CN17	CMM_0431	Putative hemagglutinin/hemolysin-related protein OS=Clavibacter michiganensis subsp. michiganensis (strain NCPPB 382) GN=CMM_0431 PE=4 SV=1 - [A5CN17_CLAM3]	IV.4.6	80.9	1	44	44	302				754	76.8391	8.57275
A5CPF4	CMM_0915	Putative penicillin-binding protein OS=Clavibacter michiganensis subsp. michiganensis (strain NCPPB 382) GN=pbpC PE=4 SV=1 - [A5CPF4_CLAM3]	II.2.1	72.45	1	42	43	637	catalytic activity	membrane	metabolic process	744	79.2197	5.46533
A5CTX3	CMM_2478	60 kDa chaperonin OS=Clavibacter michiganensis subsp. michiganensis (strain NCPPB 382) GN=groL PE=3 SV=1 - [CH60_CLAM3]	IV.4.1	75.51	1	49	49	759	nucleotide binding; protein binding	cytoplasm	metabolic process	539	56.7464	4.94482
A5CNL6	CMM_0627	Uncharacterized protein OS=Clavibacter michiganensis subsp. michiganensis (strain NCPPB 382) GN=CMM_0627 PE=4 SV=1 - [A5CNL6_CLAM3]	II.2.5	34.22	1	44	44	260				2218	234.489	5.23682
A5CQZ8	CMM_1457	PepN protein OS=Clavibacter michiganensis subsp. michiganensis (strain NCPPB 382) GN=pepN PE=4 SV=1 - [A5CQZ8_CLAM3]	I.2.10	68.36	1	43	43	336	catalytic activity; metal ion binding		metabolic process	847	93.5848	4.65283
A5CPF8	CMM_0919	Putative penicillin-binding protein OS=Clavibacter michiganensis subsp. michiganensis (strain NCPPB 382) GN=pbpD PE=4 SV=1 - [A5CPF8_CLAM3]	II.2.1	81.54	1	41	42	1111	catalytic activity	membrane	metabolic process	845	88.0785	5.2749
A5CNK7	CMM_0619	Delta-1-pyrroline-5-carboxylate dehydrogenase /proline oxidase OS=Clavibacter michiganensis subsp. michiganensis (strain NCPPB 382) GN=putA PE=3 SV=1 - [A5CNK7_CLAM3]	I.2.3	53.21	1	48	48	185	catalytic activity		regulation of biological process; metabolic process	1216	131.163	5.22412
A5CRX5	CMM_1782	Carbamoyl-phosphate synthase large chain OS=Clavibacter michiganensis subsp. michiganensis (strain NCPPB 382) GN=carB PE=3 SV=1 - [CARB_CLAM3]	I.3.2	51.64	1	45	45	242	nucleotide binding; metal ion binding; catalytic activity		metabolic process	1096	117.492	4.81787
A5CM86	CMM_0151	Chaperone protein DnaK OS=Clavibacter michiganensis subsp. michiganensis (strain NCPPB 382) GN=dnaK PE=3 SV=1 - [DNAK_CLAM3]	IV.4.1	79.45	1	46	46	390	nucleotide binding; protein binding		cell organization and biogenesis; metabolic process; response to stimulus	623	67.1123	4.79248
A5CP58	CMM_0819	Putative cell surface protein OS=Clavibacter michiganensis subsp. michiganensis (strain NCPPB 382) GN=wcoA PE=4 SV=1 - [A5CP58_CLAM3]	II.2.8	59.17	1	37	37	186				872	89.1742	8.30908
A5CP34	CMM_0795	Putative extracellular nuclease/phosphatase OS=Clavibacter michiganensis subsp. michiganensis (strain NCPPB 382) GN=CMM_0795 PE=4 SV=1 - [A5CP34_CLAM3]	IV.6.3	65.4	1	37	37	406	catalytic activity		metabolic process	711	73.9147	5.10986
A5CT30	CMM_2185	Putative peptide ABC transporter, substrate-binding protein OS=Clavibacter michiganensis subsp. michiganensis (strain NCPPB 382) GN=CMM_2185 PE=4 SV=1 - [A5CT30_CLAM3]	IV.1.4	51.72	1	36	36	465	transporter activity		transport	611	66.3687	4.52588
A5CT41	CMM_2195	Glycine dehydrogenase (decarboxylating) OS=Clavibacter michiganensis subsp. michiganensis (strain NCPPB 382) GN=gcvP PE=3 SV=1 - [A5CT41_CLAM3]	I.2.4	63.77	1	39	39	242	catalytic activity		metabolic process	991	104.953	5.49072
A5CU31	CMM_2535	Putative serine protease, peptidase family S8A OS=Clavibacter michiganensis subsp. michiganensis (strain NCPPB 382) GN=sbtB PE=3 SV=1 - [A5CU31_CLAM3]	IV.6.1	43.8	1	32	32	200	catalytic activity; protein binding		metabolic process; regulation of biological process	1226	123.637	4.62744
A5CRU5	CMM_1752	30S ribosomal protein S1 OS=Clavibacter michiganensis subsp. michiganensis (strain NCPPB 382) GN=rpsA PE=4 SV=1 - [A5CRU5_CLAM3]	III.3.1	76.45	1	34	34	237	RNA binding; structural molecule activity	ribosome	metabolic process	484	53.0465	4.85596
A5CU33	CMM_2537	Isocitrate dehydrogenase [NADP] OS=Clavibacter michiganensis subsp. michiganensis (strain NCPPB 382) GN=icdA PE=3 SV=1 - [A5CU33_CLAM3]	I.1.3	77.97	1	32	32	472	metal ion binding; catalytic activity; nucleotide binding		metabolic process	404	44.9466	5.12256
A5CNX6	CMM_0737	Catalase OS=Clavibacter michiganensis subsp. michiganensis (strain NCPPB 382) GN=katA PE=3 SV=1 - [A5CNX6_CLAM3]	IV.5.1	73.87	1	32	32	407	antioxidant activity; catalytic activity; metal ion binding		response to stimulus; metabolic process	509	56.6448	5.60498
A5CRS7	CMM_1734	Transketolase OS=Clavibacter michiganensis subsp. michiganensis (strain NCPPB 382) GN=tktA PE=3 SV=1 - [A5CRS7_CLAM3]	I.1.2	63.65	1	32	32	429	catalytic activity; metal ion binding		metabolic process	696	75.0158	4.95752
A5CQ60	CMM_1169	ATP synthase subunit beta OS=Clavibacter michiganensis subsp. michiganensis (strain NCPPB 382) GN=atpD PE=3 SV=1 - [ATPB_CLAM3]	IV.1.18	75.93	1	29	29	230	nucleotide binding; catalytic activity; transporter activity	membrane	metabolic process; transport	486	53.0182	4.93213
A5CTU6	CMM_2451	Uncharacterized protein OS=Clavibacter michiganensis subsp. michiganensis (strain NCPPB 382) GN=CMM_2451 PE=4 SV=1 - [A5CTU6_CLAM3]	V.2.1	40.21	1	40	40	157				1241	134.825	6.29053
A5CRM2	CMM_1679	Uncharacterized protein OS=Clavibacter michiganensis subsp. michiganensis (strain NCPPB 382) GN=CMM_1679 PE=4 SV=1 - [A5CRM2_CLAM3]	IV.7.3	56.69	1	32	32	145	catalytic activity	membrane	metabolic process	695	73.7063	5.07178
A5CSV4	CMM_2109	Beta-galactosidase OS=Clavibacter michiganensis subsp. michiganensis (strain NCPPB 382) GN=lacZ PE=4 SV=1 - [A5CSV4_CLAM3]	I.1.8	43.56	1	31	31	189	catalytic activity		metabolic process	1017	112.208	4.88135
A5CT49	CMM_2204	Uncharacterized protein OS=Clavibacter michiganensis subsp. michiganensis (strain NCPPB 382) GN=CMM_2204 PE=3 SV=1 - [A5CT49_CLAM3]	V.2.1	66.17	1	33	33	250	catalytic activity		metabolic process	949	97.8717	4.85596
A5CRZ5	CMM_1802	Alanine--tRNA ligase OS=Clavibacter michiganensis subsp. michiganensis (strain NCPPB 382) GN=alaS PE=3 SV=1 - [SYA_CLAM3]	III.3.2	47.8	1	31	31	186	RNA binding; nucleotide binding; catalytic activity; metal ion binding	cytoplasm	metabolic process	885	95.3323	5.18604
A5CS57	CMM_1865	Putative peptidoglycan glycosyltransferase/penicillin-binding protein OS=Clavibacter michiganensis subsp. michiganensis (strain NCPPB 382) GN=ftsI PE=4 SV=1 - [A5CS57_CLAM3]	II.2.1	69.31	1	29	29	288	catalytic activity		metabolic process	593	62.4788	5.03369
A5CRK2	CMM_1659	Aconitate hydratase OS=Clavibacter michiganensis subsp. michiganensis (strain NCPPB 382) GN=acnA PE=3 SV=1 - [A5CRK2_CLAM3]	I.1.3	34.15	1	29	29	201	catalytic activity; metal ion binding		metabolic process	937	100.761	4.7417
A5CPR3	CMM_1022	Putative secreted protein OS=Clavibacter michiganensis subsp. michiganensis (strain NCPPB 382) GN=wcqK PE=4 SV=1 - [A5CPR3_CLAM3]	II.2.9	64.04	1	27	27	239				609	63.4776	7.86963
A5CP78	CMM_0839	Putative membrane bound metalloprotease OS=Clavibacter michiganensis subsp. michiganensis (strain NCPPB 382) GN=CMM_0839 PE=4 SV=1 - [A5CP78_CLAM3]	IV.7.1	72.85	1	26	26	331	catalytic activity		metabolic process	431	45.2746	5.66846
A5CP96	CMM_0857	ATP-dependent protease, ATPase subunit OS=Clavibacter michiganensis subsp. michiganensis (strain NCPPB 382) GN=clpC PE=4 SV=1 - [A5CP96_CLAM3]	IV.4.2	57.78	1	37	38	208	nucleotide binding; protein binding; catalytic activity		metabolic process	836	92.3149	5.64307
A5CQX2	CMM_1431	Maltooligosyltrehalose synthase OS=Clavibacter michiganensis subsp. michiganensis (strain NCPPB 382) GN=treY PE=4 SV=1 - [A5CQX2_CLAM3]	I.1.5	57.22	1	35	35	157	catalytic activity		metabolic process	783	85.4222	4.88135
A5CLY4	CMM_0049	Beta-N-acetylhexosaminidase OS=Clavibacter michiganensis subsp. michiganensis (strain NCPPB 382) GN=nagA PE=4 SV=1 - [A5CLY4_CLAM3]	I.1.9	59.8	1	28	28	165	catalytic activity		metabolic process	607	63.1882	6.44287
A5CSN9	CMM_2047	Polyribonucleotide nucleotidyltransferase OS=Clavibacter michiganensis subsp. michiganensis (strain NCPPB 382) GN=pnp PE=3 SV=1 - [PNP_CLAM3]	III.3.4	60.5	1	36	36	244	catalytic activity; metal ion binding; RNA binding	cytoplasm	metabolic process	757	80.3307	4.94482
A5CRB9	CMM_1576	2-isopropylmalate synthase OS=Clavibacter michiganensis subsp. michiganensis (strain NCPPB 382) GN=leuA PE=3 SV=1 - [LEU1_CLAM3]	I.2.5	63.95	1	32	32	278	catalytic activity		metabolic process	588	64.8598	4.85596
A5CNW7	CMM_0728	Phosphoribosylformylglycinamidine synthase subunit PurL OS=Clavibacter michiganensis subsp. michiganensis (strain NCPPB 382) GN=purL PE=3 SV=1 - [A5CNW7_CLAM3]	I.3.1	56.23	1	29	29	139	nucleotide binding; metal ion binding; catalytic activity	cytoplasm	metabolic process	786	83.8139	4.76709
A5CR16	CMM_1473	Phosphoenolpyruvate carboxykinase [GTP] OS=Clavibacter michiganensis subsp. michiganensis (strain NCPPB 382) GN=pckA PE=3 SV=1 - [A5CR16_CLAM3]	I.1.3	47.52	1	26	26	78	nucleotide binding; catalytic activity; metal ion binding	cytoplasm	metabolic process	646	70.1482	5.30029
A5CQA6	CMM_1215	Uncharacterized protein OS=Clavibacter michiganensis subsp. michiganensis (strain NCPPB 382) GN=CMM_1215 PE=4 SV=1 - [A5CQA6_CLAM3]	V.2.1	34.98	1	27	27	154				1152	117.016	6.40479
A5CPY3	CMM_1093	Dihydroxy-acid dehydratase OS=Clavibacter michiganensis subsp. michiganensis (strain NCPPB 382) GN=ilvD PE=3 SV=1 - [ILVD_CLAM3]	I.2.5	64.36	1	27	27	195	catalytic activity; metal ion binding		metabolic process	564	59.248	5.12256
A5CLK3	pCM1_0020	Endoglucanase OS=Clavibacter michiganensis subsp. michiganensis (strain NCPPB 382) GN=celA PE=1 SV=1 - [A5CLK3_CLAM3]	IV.6.3	54.16	1	23	23	283	catalytic activity		metabolic process	746	77.9751	7.10791
A5CR15	CMM_1472	Valine--tRNA ligase OS=Clavibacter michiganensis subsp. michiganensis (strain NCPPB 382) GN=valS PE=3 SV=1 - [A5CR15_CLAM3]	III.3.2	54.37	1	35	35	176	nucleotide binding; catalytic activity	cytoplasm	metabolic process; regulation of biological process	881	96.5227	5.05908
A5CSJ1	CMM_2002	Phenylalanine--tRNA ligase beta subunit OS=Clavibacter michiganensis subsp. michiganensis (strain NCPPB 382) GN=pheT PE=3 SV=1 - [A5CSJ1_CLAM3]	III.3.2	50.53	1	30	30	128	RNA binding; nucleotide binding; metal ion binding; catalytic activity	cytoplasm	metabolic process	847	88.2554	5.12256
A5CT24	CMM_2179	GTP-binding protein typA/bipA homolog OS=Clavibacter michiganensis subsp. michiganensis (strain NCPPB 382) GN=bipA PE=4 SV=1 - [A5CT24_CLAM3]	III.3.5	51.65	1	28	28	194	nucleotide binding; catalytic activity		metabolic process	635	69.5749	5.26221
A5CUB6	CMM_2620	Elongation factor Tu OS=Clavibacter michiganensis subsp. michiganensis (strain NCPPB 382) GN=tuf PE=3 SV=1 - [EFTU_CLAM3]	III.3.3	74.31	1	26	26	452	nucleotide binding; RNA binding; catalytic activity	cytoplasm	metabolic process	397	43.3462	5.23682
A5CRT0	CMM_1737	Glucose-6-phosphate 1-dehydrogenase OS=Clavibacter michiganensis subsp. michiganensis (strain NCPPB 382) GN=zwfA2 PE=3 SV=1 - [A5CRT0_CLAM3]	I.1.2	57.31	1	23	23	161	catalytic activity; nucleotide binding		metabolic process	513	57.8676	5.30029
A5CP79	CMM_0840	NPL/P60 family secreted protein OS=Clavibacter michiganensis subsp. michiganensis (strain NCPPB 382) GN=CMM_0840 PE=4 SV=1 - [A5CP79_CLAM3]	IV.6.3	61.27	1	23	23	719				457	45.5947	5.04639
A5CRI5	CMM_1642	Dihydrolipoyl dehydrogenase OS=Clavibacter michiganensis subsp. michiganensis (strain NCPPB 382) GN=lpdB PE=3 SV=1 - [A5CRI5_CLAM3]	I.1.3	62.14	1	21	21	224	catalytic activity; nucleotide binding	cytoplasm	metabolic process; cellular homeostasis; regulation of biological process	457	48.0602	5.51611
A5CM05	CMM_0070	Subtilisin-like serine protease, peptidase family S8A OS=Clavibacter michiganensis subsp. michiganensis (strain NCPPB 382) GN=sbtA PE=4 SV=1 - [A5CM05_CLAM3]	IV.6.1	52.37	1	32	32	126	catalytic activity; protein binding		metabolic process; regulation of biological process	1033	103.796	5.74463
A5CQ58	CMM_1167	ATP synthase subunit alpha OS=Clavibacter michiganensis subsp. michiganensis (strain NCPPB 382) GN=atpA PE=3 SV=1 - [ATPA_CLAM3]	IV.1.18	56.33	1	28	28	177	nucleotide binding; catalytic activity; transporter activity	membrane	metabolic process; transport	545	58.9806	5.12256
A5CTZ9	CMM_2503	Polyphosphate kinase OS=Clavibacter michiganensis subsp. michiganensis (strain NCPPB 382) GN=ppkA PE=3 SV=1 - [A5CTZ9_CLAM3]	I.1.7	37.14	1	25	26	105	nucleotide binding; catalytic activity		metabolic process	727	81.5797	5.43994
A5CS23	CMM_1831	Glycerol kinase OS=Clavibacter michiganensis subsp. michiganensis (strain NCPPB 382) GN=glpK PE=3 SV=1 - [GLPK_CLAM3]	IV.1.20	58.61	1	20	20	231	nucleotide binding; catalytic activity		metabolic process	505	55.4509	4.77979
A5CRU6	CMM_1753	Uncharacterized protein OS=Clavibacter michiganensis subsp. michiganensis (strain NCPPB 382) GN=CMM_1753 PE=4 SV=1 - [A5CRU6_CLAM3]	V.2.1	59.21	1	23	23	122				559	62.1619	4.95752
A5CPN1	CMM_0991	Acetyl/propionyl CoA carboxylase subunit OS=Clavibacter michiganensis subsp. michiganensis (strain NCPPB 382) GN=accA PE=4 SV=1 - [A5CPN1_CLAM3]	I.4.1	45.67	1	22	22	137	catalytic activity; nucleotide binding; metal ion binding		metabolic process	589	62.2641	5.24951
A5CRT6	CMM_1743	Phosphoglycerate kinase OS=Clavibacter michiganensis subsp. michiganensis (strain NCPPB 382) GN=pgk PE=3 SV=1 - [PGK_CLAM3]	I.1.1	65.1	1	22	22	129	nucleotide binding; catalytic activity	cytoplasm	metabolic process	404	42.0789	4.85596
A5CQT8	CMM_1397	1,4-alpha-glucan branching enzyme GlgB OS=Clavibacter michiganensis subsp. michiganensis (strain NCPPB 382) GN=glgB PE=3 SV=1 - [A5CQT8_CLAM3]	I.1.8	47.96	1	24	24	121	catalytic activity		metabolic process	859	94.119	4.80518
A5CPG1	CMM_0922	Acetyl-coenzyme A synthetase OS=Clavibacter michiganensis subsp. michiganensis (strain NCPPB 382) GN=acsA1 PE=3 SV=1 - [A5CPG1_CLAM3]	I.4.3	51.55	1	24	24	94	nucleotide binding; catalytic activity; metal ion binding		metabolic process	679	73.531	5.08447
A5CNX4	CMM_0735	Putative oxidoreductase OS=Clavibacter michiganensis subsp. michiganensis (strain NCPPB 382) GN=CMM_0735 PE=4 SV=1 - [A5CNX4_CLAM3]	V.1.3	82.67	1	23	23	137				329	35.1709	5.08447
A5CPA5	CMM_0866	Putative alpha-glucoside ABC transporter,substrate-binding protein OS=Clavibacter michiganensis subsp. michiganensis (strain NCPPB 382) GN=CMM_0866 PE=4 SV=1 - [A5CPA5_CLAM3]	IV.1.5	53.3	1	22	22	446	transporter activity		transport	454	48.1192	4.37354
A5CRE2	CMM_1600	GDP-mannose 4,6-dehydratase OS=Clavibacter michiganensis subsp. michiganensis (strain NCPPB 382) GN=gmdA PE=3 SV=1 - [A5CRE2_CLAM3]	II.2.10	87.43	1	22	22	461	catalytic activity; nucleotide binding		metabolic process	350	39.0124	5.36377
A5CN16	CMM_0430	Hypothetical secreted protein, putative cell-surface protein OS=Clavibacter michiganensis subsp. michiganensis (strain NCPPB 382) GN=CMM_0430 PE=4 SV=1 - [A5CN16_CLAM3]	II.2.5	58.22	1	21	21	136				608	62.2059	8.54346
A5CPH1	CMM_0931	D-alanyl-D-alanine carboxypeptidase OS=Clavibacter michiganensis subsp. michiganensis (strain NCPPB 382) GN=pbpE PE=4 SV=1 - [A5CPH1_CLAM3]	II.2.1	57.96	1	21	21	178	catalytic activity		metabolic process	452	45.8716	5.33838
A5CU80	CMM_2584	DNA-directed RNA polymerase subunit alpha OS=Clavibacter michiganensis subsp. michiganensis (strain NCPPB 382) GN=rpoA PE=3 SV=1 - [RPOA_CLAM3]	III.2.1	70.39	1	21	21	215	DNA binding; catalytic activity; protein binding		metabolic process	331	36.0226	4.75439
A5CQ17	CMM_1126	Putative 5'-nucleotidase OS=Clavibacter michiganensis subsp. michiganensis (strain NCPPB 382) GN=CMM_1126 PE=4 SV=1 - [A5CQ17_CLAM3]	II.2.5	62.52	1	20	20	140	catalytic activity		metabolic process	715	73.1799	4.55127
A5CMS5	CMM_0338	Uncharacterized protein OS=Clavibacter michiganensis subsp. michiganensis (strain NCPPB 382) GN=CMM_0338 PE=4 SV=1 - [A5CMS5_CLAM3]	V.2.1	68.12	1	20	20	706			metabolic process	414	43.9745	5.60498
A5CM25	CMM_0090	Beta-xylanase OS=Clavibacter michiganensis subsp. michiganensis (strain NCPPB 382) GN=tomA PE=3 SV=1 - [A5CM25_CLAM3]	IV.6.3	45.12	1	19	19	48	catalytic activity		metabolic process	543	58.1394	5.18604
A5CSD4	CMM_1942	Uncharacterized protein OS=Clavibacter michiganensis subsp. michiganensis (strain NCPPB 382) GN=ppaG PE=4 SV=1 - [A5CSD4_CLAM3]	IV.6.1	79.88	1	19	19	455	catalytic activity		metabolic process	333	34.3794	6.16357
A5CUH3	CMM_2676	Beta-lactamase OS=Clavibacter michiganensis subsp. michiganensis (strain NCPPB 382) GN=blaC PE=3 SV=1 - [A5CUH3_CLAM3]	IV.5.6	66.15	1	18	18	114	catalytic activity		metabolic process; response to stimulus	322	32.4915	4.60205
A5CQ47	CMM_1156	Transcription termination factor Rho OS=Clavibacter michiganensis subsp. michiganensis (strain NCPPB 382) GN=rho PE=3 SV=1 - [A5CQ47_CLAM3]	III.2.1	47.87	1	29	29	137	nucleotide binding; RNA binding; catalytic activity		metabolic process; regulation of biological process	823	87.5154	5.30029
A5CTC0	CMM_2275	Bifunctional protein GlmU OS=Clavibacter michiganensis subsp. michiganensis (strain NCPPB 382) GN=glmU PE=3 SV=1 - [A5CTC0_CLAM3]	II.2.1	70.82	1	26	26	105	metal ion binding; catalytic activity	cytoplasm	cell organization and biogenesis; metabolic process; regulation of biological process	514	54.0453	5.5542
A5CQT9	CMM_1398	Alpha-1,4-glucan:maltose-1-phosphate maltosyltransferase OS=Clavibacter michiganensis subsp. michiganensis (strain NCPPB 382) GN=glgE PE=3 SV=1 - [A5CQT9_CLAM3]	I.1.8	57.16	1	24	24	92	catalytic activity		metabolic process	712	78.5745	5.13525
A5CS13	CMM_1821	Threonine--tRNA ligase OS=Clavibacter michiganensis subsp. michiganensis (strain NCPPB 382) GN=thrS PE=3 SV=1 - [A5CS13_CLAM3]	III.3.2	45.76	1	24	24	100	nucleotide binding; catalytic activity; metal ion binding	cytoplasm	metabolic process	684	76.7086	5.18604
A5CNA0	CMM_0513	PgmA protein OS=Clavibacter michiganensis subsp. michiganensis (strain NCPPB 382) GN=pgmA PE=3 SV=1 - [A5CNA0_CLAM3]	I.1.9	69.96	1	24	24	142	metal ion binding; catalytic activity		metabolic process	546	58.1654	5.021
A5CPM8	CMM_0988	Putative phosphomannomutase OS=Clavibacter michiganensis subsp. michiganensis (strain NCPPB 382) GN=manB PE=3 SV=1 - [A5CPM8_CLAM3]	I.1.10	47.8	1	23	23	111	metal ion binding; catalytic activity		metabolic process	567	60.5971	4.97021
A5CNE9	CMM_0561	Aspartyl-tRNA synthetase OS=Clavibacter michiganensis subsp. michiganensis (strain NCPPB 382) GN=aspS PE=3 SV=1 - [A5CNE9_CLAM3]	III.3.2	67.43	1	23	23	104	nucleotide binding; catalytic activity	cytoplasm	metabolic process	436	48.7938	5.09717
A5CSZ7	CMM_2152	Proline--tRNA ligase OS=Clavibacter michiganensis subsp. michiganensis (strain NCPPB 382) GN=proS PE=3 SV=1 - [SYP_CLAM3]	III.3.2	59.32	1	22	23	120	nucleotide binding; catalytic activity	cytoplasm	metabolic process; regulation of biological process	590	63.7469	5.10986
A5CRX0	CMM_1777	S-adenosylmethionine synthase OS=Clavibacter michiganensis subsp. michiganensis (strain NCPPB 382) GN=metK PE=3 SV=1 - [METK_CLAM3]	I.5.11	72.95	1	22	22	133	nucleotide binding; metal ion binding; catalytic activity	cytoplasm	metabolic process	403	43.2031	5.21143
A5CU50	CMM_2554	GMP synthase [glutamine-hydrolyzing] OS=Clavibacter michiganensis subsp. michiganensis (strain NCPPB 382) GN=guaA PE=3 SV=1 - [A5CU50_CLAM3]	I.3.1	61.6	1	21	21	131	nucleotide binding; catalytic activity	cytoplasm	metabolic process	526	56.1609	4.99561
A5CRS8	CMM_1735	Transaldolase OS=Clavibacter michiganensis subsp. michiganensis (strain NCPPB 382) GN=talA PE=3 SV=1 - [A5CRS8_CLAM3]	I.1.2	63.34	1	21	21	213	catalytic activity	cytoplasm	metabolic process	371	39.8675	4.70361
A5CPN9	CMM_0999	Putative acetyl/propionyl-CoA carboxylase beta chain OS=Clavibacter michiganensis subsp. michiganensis (strain NCPPB 382) GN=accD PE=4 SV=1 - [A5CPN9_CLAM3]	I.4.1	53.26	1	20	20	108	catalytic activity		metabolic process	537	57.7138	5.42725
A5CTU2	CMM_2446	UTP--glucose-1-phosphate uridylyltransferase OS=Clavibacter michiganensis subsp. michiganensis (strain NCPPB 382) GN=galU PE=3 SV=1 - [A5CTU2_CLAM3]	I.1.9	76.51	1	20	20	163	catalytic activity		metabolic process	298	32.755	5.37646
A5CRH9	CMM_1636	Glutamine synthetase OS=Clavibacter michiganensis subsp. michiganensis (strain NCPPB 382) GN=glnA1 PE=3 SV=1 - [A5CRH9_CLAM3]	I.2.2	53.38	1	20	20	206	nucleotide binding; catalytic activity	cytoplasm	metabolic process	474	52.9945	5.07178
A5CRF9	CMM_1616	3-oxoacyl-[acyl-carrier-protein] synthase 2 OS=Clavibacter michiganensis subsp. michiganensis (strain NCPPB 382) GN=fabF PE=3 SV=1 - [A5CRF9_CLAM3]	I.4.1	91.04	1	20	20	205	catalytic activity		metabolic process	413	42.9919	5.21143
A5CPZ0	CMM_1100	D-3-phosphoglycerate dehydrogenase OS=Clavibacter michiganensis subsp. michiganensis (strain NCPPB 382) GN=serA PE=3 SV=1 - [A5CPZ0_CLAM3]	I.2.4	52.17	1	19	19	135	catalytic activity; nucleotide binding		metabolic process	529	55.4756	4.95752
A5CRT7	CMM_1744	Glyceraldehyde-3-phosphate dehydrogenase OS=Clavibacter michiganensis subsp. michiganensis (strain NCPPB 382) GN=gapA PE=3 SV=1 - [A5CRT7_CLAM3]	I.1.1	74.93	1	18	18	408	catalytic activity; nucleotide binding		metabolic process	335	35.6876	5.24951
A5CU62	CMM_2566	Putative branched-chain amino acid ABC transporter, substrate-binding protein OS=Clavibacter michiganensis subsp. michiganensis (strain NCPPB 382) GN=livK PE=4 SV=1 - [A5CU62_CLAM3]	IV.1.4	48.71	1	17	17	196			transport	427	44.0538	4.39893
A5CST1	CMM_2088	Putative oxidoreductase OS=Clavibacter michiganensis subsp. michiganensis (strain NCPPB 382) GN=CMM_2088 PE=4 SV=1 - [A5CST1_CLAM3]	V.1.3	73.45	1	17	17	219	metal ion binding; catalytic activity		metabolic process	339	35.6389	4.99561
A5CPU4	CMM_1054	Protein translocase subunit SecA OS=Clavibacter michiganensis subsp. michiganensis (strain NCPPB 382) GN=secA PE=3 SV=1 - [SECA_CLAM3]	IV.2.1	37.09	1	26	26	108	nucleotide binding; catalytic activity	cytoplasm; membrane	transport	941	104.502	5.36377
A5CSZ4	CMM_2149	Translation initiation factor IF-2 OS=Clavibacter michiganensis subsp. michiganensis (strain NCPPB 382) GN=infB PE=3 SV=1 - [IF2_CLAM3]	III.3.3	38.98	1	26	26	133	nucleotide binding; RNA binding; catalytic activity	cytoplasm	metabolic process; regulation of biological process; response to stimulus	944	98.2468	5.8208
A5CRS4	CMM_1731	Uncharacterized protein OS=Clavibacter michiganensis subsp. michiganensis (strain NCPPB 382) GN=CMM_1731 PE=4 SV=1 - [A5CRS4_CLAM3]	IV.5.5	61.44	1	22	22	113			cell organization and biogenesis; metabolic process	472	52.4841	5.18604
A5CQS5	CMM_1383	30S ribosomal protein S2 OS=Clavibacter michiganensis subsp. michiganensis (strain NCPPB 382) GN=rpsB PE=3 SV=1 - [RS2_CLAM3]	III.3.1	73.97	1	21	21	124	structural molecule activity	ribosome	metabolic process	315	34.9981	5.16064
A5CPY6	CMM_1096	Ketol-acid reductoisomerase OS=Clavibacter michiganensis subsp. michiganensis (strain NCPPB 382) GN=ilvC PE=3 SV=1 - [ILVC_CLAM3]	I.2.5	65.98	1	21	21	196	catalytic activity		metabolic process	341	37.1478	5.021
A5CR89	CMM_1547	Leucine--tRNA ligase OS=Clavibacter michiganensis subsp. michiganensis (strain NCPPB 382) GN=leuS PE=3 SV=1 - [SYL_CLAM3]	III.3.2	28.2	1	20	20	79	nucleotide binding; catalytic activity	cytoplasm	metabolic process; regulation of biological process	851	94.8912	5.21143
A5CU18	CMM_2522	Serine hydroxymethyltransferase OS=Clavibacter michiganensis subsp. michiganensis (strain NCPPB 382) GN=glyA PE=3 SV=1 - [GLYA_CLAM3]	I.2.4	70.82	1	20	20	132	catalytic activity	cytoplasm	metabolic process	425	45.1262	5.56689
A5CTS7	CMM_2429	Ribonucleoside-diphosphate reductase OS=Clavibacter michiganensis subsp. michiganensis (strain NCPPB 382) GN=nrdA PE=3 SV=1 - [A5CTS7_CLAM3]	I.3.1	35.37	1	20	20	129	nucleotide binding; catalytic activity		metabolic process	834	92.826	5.65576
A5CRV1	CMM_1758	Pyruvate kinase OS=Clavibacter michiganensis subsp. michiganensis (strain NCPPB 382) GN=pykA PE=3 SV=1 - [A5CRV1_CLAM3]	I.1.1	53.01	1	19	19	143	metal ion binding; catalytic activity		metabolic process	481	51.2429	5.30029
A5CU44	CMM_2548	Succinyl-CoA ligase [ADP-forming] subunit beta OS=Clavibacter michiganensis subsp. michiganensis (strain NCPPB 382) GN=sucC PE=3 SV=1 - [SUCC_CLAM3]	I.1.3	57.11	1	19	20	140	nucleotide binding; metal ion binding; catalytic activity		metabolic process	387	40.4488	4.58936
A5CRL6	CMM_1673	Beta-xylanase OS=Clavibacter michiganensis subsp. michiganensis (strain NCPPB 382) GN=xysA PE=3 SV=1 - [A5CRL6_CLAM3]	IV.6.3	63.11	1	19	19	164	catalytic activity		metabolic process	431	46.8357	6.13818
A5CRI4	CMM_1641	Putative pyruvate/2-oxoglutarate dehydrogenase complex dihydrolipoamide acyltransferase (E2) component OS=Clavibacter michiganensis subsp. michiganensis (strain NCPPB 382) GN=aceF PE=3 SV=1 - [A5CRI4_CLAM3]	I.1.3	47.08	1	18	18	153	catalytic activity		metabolic process	480	49.0363	4.57666
A5CTA8	CMM_2263	Enolase OS=Clavibacter michiganensis subsp. michiganensis (strain NCPPB 382) GN=eno PE=3 SV=1 - [ENO_CLAM3]	I.1.1	60.33	1	18	18	224	metal ion binding; catalytic activity	extracellular; cytoplasm; cell surface	metabolic process	426	44.8219	4.70361
A5CR19	CMM_1478	Putative oligopeptide ABC transporter, substrate-binding protein OS=Clavibacter michiganensis subsp. michiganensis (strain NCPPB 382) GN=CMM_1478 PE=4 SV=1 - [A5CR19_CLAM3]	IV.1.4	59.67	1	17	17	118	transporter activity		transport	548	58.0099	4.60205
A5CS64	CMM_1872	Uncharacterized protein OS=Clavibacter michiganensis subsp. michiganensis (strain NCPPB 382) GN=CMM_1872 PE=4 SV=1 - [A5CS64_CLAM3]	V.2.1	75.65	1	17	17	485			metabolic process	423	43.012	9.43701
A5CR28	CMM_1487	Putative ribonuclease OS=Clavibacter michiganensis subsp. michiganensis (strain NCPPB 382) GN=CMM_1487 PE=4 SV=1 - [A5CR28_CLAM3]	III.2.2	47.32	1	31	31	113	RNA binding; catalytic activity		metabolic process	1006	108.526	5.68115
A5CRK3	CMM_1660	1-deoxy-D-xylulose-5-phosphate synthase OS=Clavibacter michiganensis subsp. michiganensis (strain NCPPB 382) GN=dxsA PE=3 SV=1 - [A5CRK3_CLAM3]	I.1.5	45.32	1	23	23	78	metal ion binding; catalytic activity		metabolic process	662	71.4857	5.52881
A5CPL0	CMM_0970	Succinate dehydrogenase flavoprotein subunit OS=Clavibacter michiganensis subsp. michiganensis (strain NCPPB 382) GN=CMM_0970 PE=4 SV=1 - [A5CPL0_CLAM3]	I.1.3	50.25	1	22	22	135	catalytic activity; nucleotide binding	membrane	metabolic process; transport	607	66.3672	5.31299
A5CU40	CMM_2544	Bifunctional purine biosynthesis protein PurH OS=Clavibacter michiganensis subsp. michiganensis (strain NCPPB 382) GN=purH PE=3 SV=1 - [A5CU40_CLAM3]	I.3.1	50.46	1	21	21	200	catalytic activity		metabolic process	541	56.5777	5.2749
A5CQX3	CMM_1432	Glycogen operon protein GlgX homolog OS=Clavibacter michiganensis subsp. michiganensis (strain NCPPB 382) GN=treX PE=4 SV=1 - [A5CQX3_CLAM3]	I.1.8	43.46	1	20	21	83	catalytic activity		metabolic process	734	82.1649	4.93213
A5CU70	CMM_2576	Glutamine--fructose-6-phosphate aminotransferase [isomerizing] OS=Clavibacter michiganensis subsp. michiganensis (strain NCPPB 382) GN=glmS PE=3 SV=1 - [A5CU70_CLAM3]	I.1.9	41.56	1	20	20	124	catalytic activity	cytoplasm	metabolic process	616	65.9046	5.16064
A5CSI8	CMM_1995	Argininosuccinate lyase OS=Clavibacter michiganensis subsp. michiganensis (strain NCPPB 382) GN=argH PE=3 SV=1 - [ARLY_CLAM3]	I.2.3	50.1	1	18	18	70	catalytic activity	cytoplasm	metabolic process	497	52.8631	5.26221
A5CT16	CMM_2171	Citrate synthase OS=Clavibacter michiganensis subsp. michiganensis (strain NCPPB 382) GN=gltA2 PE=3 SV=1 - [A5CT16_CLAM3]	I.1.3	48.07	1	17	17	108	catalytic activity	cytoplasm	metabolic process	441	48.814	5.63037
A5CSE3	CMM_1951	Putative glycine betaine aldehyde dehydrogenase OS=Clavibacter michiganensis subsp. michiganensis (strain NCPPB 382) GN=CMM_1951 PE=3 SV=1 - [A5CSE3_CLAM3]	I.1.5	47.09	1	17	17	123	catalytic activity		metabolic process	499	52.3935	5.07178
A5CS34	CMM_1842	Putative cytochrome c oxidase subunit II OS=Clavibacter michiganensis subsp. michiganensis (strain NCPPB 382) GN=ctaC PE=4 SV=1 - [A5CS34_CLAM3]	I.1.4	60.4	1	17	17	255	catalytic activity; transporter activity; metal ion binding	membrane	metabolic process; transport	303	33.9704	5.2749
A5CT21	CMM_2176	Conserved secreted lipoprotein OS=Clavibacter michiganensis subsp. michiganensis (strain NCPPB 382) GN=CMM_2176 PE=4 SV=1 - [A5CT21_CLAM3]	IV.1.16	63.21	1	17	17	145				405	42.3398	4.39893
A5CLY5	CMM_0050	Uncharacterized protein OS=Clavibacter michiganensis subsp. michiganensis (strain NCPPB 382) GN=ppaB2 PE=4 SV=1 - [A5CLY5_CLAM3]	IV.6.1	85.89	2	17	17	449	catalytic activity		metabolic process	333	34.2514	4.85596
A5CMS3	CMM_0337	Uncharacterized protein OS=Clavibacter michiganensis subsp. michiganensis (strain NCPPB 382) GN=CMM_0337 PE=4 SV=1 - [A5CMS3_CLAM3]	V.2.1	48.99	1	16	16	130	catalytic activity		metabolic process	447	46.1333	4.39893
A5CTZ0	CMM_2495	2,3-bisphosphoglycerate-dependent phosphoglycerate mutase OS=Clavibacter michiganensis subsp. michiganensis (strain NCPPB 382) GN=gpmA PE=3 SV=1 - [GPMA_CLAM3]	I.1.1	86.85	1	16	16	88	catalytic activity		metabolic process	251	27.6991	5.04639
A5CRS9	CMM_1736	Glucose-6-phosphate isomerase OS=Clavibacter michiganensis subsp. michiganensis (strain NCPPB 382) GN=pgiA PE=3 SV=1 - [A5CRS9_CLAM3]	I.1.1	61.21	1	16	16	113	catalytic activity	cytoplasm	metabolic process	531	54.8186	4.61475
A5CTT4	CMM_2438	Putative L-arabinose ABC transporter, substrate binding protein OS=Clavibacter michiganensis subsp. michiganensis (strain NCPPB 382) GN=CMM_2438 PE=4 SV=1 - [A5CTT4_CLAM3]	IV.1.5	44.99	1	15	15	70				449	47.7558	4.86865
A5CNM7	CMM_0638	Putative membrane metalloendopeptidase,subfamily M23B OS=Clavibacter michiganensis subsp. michiganensis (strain NCPPB 382) GN=CMM_0638 PE=4 SV=1 - [A5CNM7_CLAM3]	IV.7.1	54.89	1	15	15	161				419	42.8454	5.87158
A5CQ41	CMM_1150	Arginine--tRNA ligase OS=Clavibacter michiganensis subsp. michiganensis (strain NCPPB 382) GN=argS PE=3 SV=1 - [A5CQ41_CLAM3]	III.3.2	61.55	1	25	25	94	nucleotide binding; catalytic activity	cytoplasm	metabolic process	554	60.3385	5.08447
A5CQZ2	CMM_1451	Putative ABC transporter, ATP-binding protein OS=Clavibacter michiganensis subsp. michiganensis (strain NCPPB 382) GN=CMM_1451 PE=3 SV=1 - [A5CQZ2_CLAM3]	IV.1.1	54.29	1	22	22	103	nucleotide binding; catalytic activity		metabolic process	560	61.8858	5.08447
A5CQ95	CMM_1204	UPF0182 protein CMM_1204 OS=Clavibacter michiganensis subsp. michiganensis (strain NCPPB 382) GN=CMM_1204 PE=3 SV=1 - [Y1204_CLAM3]	V.2.1	38.45	1	21	21	97		membrane		983	106.504	4.80518
A5CMW9	CMM_0383	Phosphoenolpyruvate carboxylase OS=Clavibacter michiganensis subsp. michiganensis (strain NCPPB 382) GN=ppcA PE=3 SV=1 - [A5CMW9_CLAM3]	I.1.5	31.76	1	21	21	81	metal ion binding; catalytic activity		metabolic process	910	99.0406	5.63037
A5CRZ1	CMM_1798	Chorismate synthase OS=Clavibacter michiganensis subsp. michiganensis (strain NCPPB 382) GN=aroC PE=3 SV=1 - [AROC_CLAM3]	I.2.7	63.11	1	21	21	101	catalytic activity		metabolic process	412	42.9431	5.43994
A5CUW6	CMM_2819	Putative metallopeptidase, family M13 OS=Clavibacter michiganensis subsp. michiganensis (strain NCPPB 382) GN=CMM_2819 PE=4 SV=1 - [A5CUW6_CLAM3]	IV.7.1	46.21	1	21	21	87	catalytic activity		metabolic process	660	73.3918	4.67822
A5CPB7	CMM_0878	L-arabinose isomerase OS=Clavibacter michiganensis subsp. michiganensis (strain NCPPB 382) GN=araA PE=3 SV=1 - [ARAA_CLAM3]	I.1.2	53.27	1	20	20	103	catalytic activity; metal ion binding	cytoplasm	metabolic process	505	55.4091	5.10986
A5CR95	CMM_1553	Uncharacterized protein OS=Clavibacter michiganensis subsp. michiganensis (strain NCPPB 382) GN=CMM_1553 PE=4 SV=1 - [A5CR95_CLAM3]	V.2.1	59.9	1	19	19	94	catalytic activity		metabolic process	419	43.9958	5.69385
A5CQL4	CMM_1323	GuaB3 protein OS=Clavibacter michiganensis subsp. michiganensis (strain NCPPB 382) GN=guaB3 PE=3 SV=1 - [A5CQL4_CLAM3]	I.3.1	68.48	1	19	19	109	catalytic activity; nucleotide binding		metabolic process	479	49.5886	5.5542
A5CT01	CMM_2156	4-hydroxy-3-methylbut-2-en-1-yl diphosphate synthase (flavodoxin) OS=Clavibacter michiganensis subsp. michiganensis (strain NCPPB 382) GN=ispG PE=3 SV=1 - [ISPG_CLAM3]	I.4.2	67.72	1	18	19	66	catalytic activity; metal ion binding		metabolic process	381	40.4615	7.00537
A5CPS4	CMM_1034	Putative phosphohexomutase OS=Clavibacter michiganensis subsp. michiganensis (strain NCPPB 382) GN=CMM_1034 PE=4 SV=1 - [A5CPS4_CLAM3]	I.1.1	44.42	1	18	18	117	catalytic activity		metabolic process	475	49.9812	4.69092
A5CRC9	CMM_1587	Putative oligopeptide ABC transporter, substrate-binding protein OS=Clavibacter michiganensis subsp. michiganensis (strain NCPPB 382) GN=CMM_1587 PE=4 SV=1 - [A5CRC9_CLAM3]	IV.1.4	41.92	1	18	18	150	transporter activity		transport	551	58.0107	4.43701
A5CRI6	CMM_1643	Probable cytosol aminopeptidase OS=Clavibacter michiganensis subsp. michiganensis (strain NCPPB 382) GN=pepA PE=3 SV=1 - [AMPA_CLAM3]	I.2.10	59.16	1	17	17	94	catalytic activity; metal ion binding	cytoplasm	metabolic process	502	51.4596	5.0083
A5CRN9	CMM_1696	Putative metallopeptidase, peptidase family M20A OS=Clavibacter michiganensis subsp. michiganensis (strain NCPPB 382) GN=CMM_1696 PE=4 SV=1 - [A5CRN9_CLAM3]	IV.7.1	52.06	1	16	16	88	catalytic activity		metabolic process	436	46.8619	4.81787
A5CM67	CMM_0132	Uncharacterized protein OS=Clavibacter michiganensis subsp. michiganensis (strain NCPPB 382) GN=CMM_0132 PE=4 SV=1 - [A5CM67_CLAM3]	V.2.1	54.69	1	16	16	84				426	44.5229	6.32861
A5CSJ8	CMM_2006	Putative glutamate ABC transporter, substrate-binding protein OS=Clavibacter michiganensis subsp. michiganensis (strain NCPPB 382) GN=gluB PE=4 SV=1 - [A5CSJ8_CLAM3]	IV.1.4	62.87	1	16	16	293	transporter activity		transport	307	32.1329	4.4624
A5CPB8	CMM_0879	Putative sugar ABC transporter, substrate-binding protein OS=Clavibacter michiganensis subsp. michiganensis (strain NCPPB 382) GN=CMM_0879 PE=4 SV=1 - [A5CPB8_CLAM3]	IV.1.5	49.47	1	16	16	429				376	39.4368	4.69092
A5CT22	CMM_2177	Uncharacterized protein OS=Clavibacter michiganensis subsp. michiganensis (strain NCPPB 382) GN=CMM_2177 PE=4 SV=1 - [A5CT22_CLAM3]	IV.1.16	48.98	1	15	15	65	antioxidant activity; catalytic activity; metal ion binding		transport; cellular homeostasis; metabolic process	443	46.148	5.8335
A5CLR5	pCM2_0052	PhpB protein OS=Clavibacter michiganensis subsp. michiganensis (strain NCPPB 382) GN=phpB PE=4 SV=1 - [A5CLR5_CLAM3]	IV.6.1	77.82	1	15	15	92	catalytic activity		metabolic process	284	29.5851	8.57275
A5CLK6	pCM1_0023	Putative extracellular serine protease OS=Clavibacter michiganensis subsp. michiganensis (strain NCPPB 382) GN=ppaJ PE=4 SV=1 - [A5CLK6_CLAM3]	IV.6.1	75.08	1	14	14	597	catalytic activity		metabolic process	313	33.0572	6.3667
A5CRL7	CMM_1674	Beta-xylanase OS=Clavibacter michiganensis subsp. michiganensis (strain NCPPB 382) GN=xysB PE=3 SV=1 - [A5CRL7_CLAM3]	IV.6.3	64.57	1	26	26	130	catalytic activity		metabolic process	669	71.2628	4.97021
A5CQB6	CMM_1225	ATP-dependent RNA helicase DeaD OS=Clavibacter michiganensis subsp. michiganensis (strain NCPPB 382) GN=deaD PE=3 SV=1 - [A5CQB6_CLAM3]	III.1.9	54.1	1	25	25	107	nucleotide binding; RNA binding; catalytic activity	cytoplasm	cell organization and biogenesis; metabolic process; response to stimulus	586	64.1044	7.09326
A5CMQ2	CMM_0316	ATPase with chaperone activity, ATP-binding subunit OS=Clavibacter michiganensis subsp. michiganensis (strain NCPPB 382) GN=clpY PE=3 SV=1 - [A5CMQ2_CLAM3]	IV.4.1	41.64	1	24	25	100	nucleotide binding; catalytic activity		metabolic process	730	80.5413	5.19873
A5CRE1	CMM_1599	GDP-L-fucose synthase OS=Clavibacter michiganensis subsp. michiganensis (strain NCPPB 382) GN=fclA PE=3 SV=1 - [A5CRE1_CLAM3]	II.2.10	70.36	1	21	21	100	catalytic activity; nucleotide binding		metabolic process	334	36.1004	5.33838
A5CSJ0	CMM_1996	Argininosuccinate synthase OS=Clavibacter michiganensis subsp. michiganensis (strain NCPPB 382) GN=argG PE=3 SV=1 - [ASSY_CLAM3]	I.2.3	59.47	1	19	19	133	nucleotide binding; catalytic activity	cytoplasm	metabolic process	412	44.798	4.93213
A5CRV7	CMM_1764	Indole-3-glycerol phosphate synthase OS=Clavibacter michiganensis subsp. michiganensis (strain NCPPB 382) GN=trpC PE=4 SV=1 - [A5CRV7_CLAM3]	I.2.7	80.23	1	18	18	94	catalytic activity		metabolic process	258	27.1615	4.91943
A5CQN4	CMM_1343	UDP-N-acetylglucosamine 1-carboxyvinyltransferase OS=Clavibacter michiganensis subsp. michiganensis (strain NCPPB 382) GN=murA PE=4 SV=1 - [A5CQN4_CLAM3]	II.2.1	56.33	1	18	18	105	catalytic activity	cytoplasm	regulation of biological process; metabolic process; cell division; cell organization and biogenesis	442	47.3988	5.50342
A5CR04	CMM_1463	Trigger factor OS=Clavibacter michiganensis subsp. michiganensis (strain NCPPB 382) GN=tig PE=3 SV=1 - [TIG_CLAM3]	IV.4.4	47.93	1	18	18	133	catalytic activity	cytoplasm	metabolic process; transport; cell division	484	52.5968	4.51318
A5CPR0	CMM_1020	GlfA protein OS=Clavibacter michiganensis subsp. michiganensis (strain NCPPB 382) GN=glfA PE=4 SV=1 - [A5CPR0_CLAM3]	II.2.9	66.93	1	18	18	100	catalytic activity; nucleotide binding		metabolic process	387	44.1749	5.03369
A5CTG2	CMM_2316	Uncharacterized protein OS=Clavibacter michiganensis subsp. michiganensis (strain NCPPB 382) GN=CMM_2316 PE=4 SV=1 - [A5CTG2_CLAM3]	V.2.1	84.44	1	17	17	119	catalytic activity		metabolic process	257	26.7779	4.7417
A5CQU9	CMM_1408	Glutamyl-tRNA(Gln) amidotransferase subunit A OS=Clavibacter michiganensis subsp. michiganensis (strain NCPPB 382) GN=gatA PE=3 SV=1 - [A5CQU9_CLAM3]	III.3.2	50.29	1	16	16	82	nucleotide binding; catalytic activity		metabolic process	515	53.6904	5.07178
A5CNA2	CMM_0515	Serine--tRNA ligase OS=Clavibacter michiganensis subsp. michiganensis (strain NCPPB 382) GN=serS PE=3 SV=1 - [SYS_CLAM3]	III.3.2	53.76	1	16	16	90	nucleotide binding; catalytic activity	cytoplasm	metabolic process	426	46.4877	5.23682
A5CUB0	CMM_2614	50S ribosomal protein L2 OS=Clavibacter michiganensis subsp. michiganensis (strain NCPPB 382) GN=rplB PE=3 SV=1 - [RL2_CLAM3]	III.3.1	52.33	1	16	16	101	RNA binding; structural molecule activity; catalytic activity	ribosome	metabolic process	279	30.5114	11.2827
A5CLX3	CMM_0039	Putative extracellular serine protease, family S1A OS=Clavibacter michiganensis subsp. michiganensis (strain NCPPB 382) GN=chpE PE=4 SV=1 - [A5CLX3_CLAM3]	IV.6.1	76.53	1	15	15	121	catalytic activity		metabolic process	277	29.2315	7.79639
A5CV45	CMM_2898	Alanine dehydrogenase OS=Clavibacter michiganensis subsp. michiganensis (strain NCPPB 382) GN=aldA PE=3 SV=1 - [A5CV45_CLAM3]	I.2.2	67.65	1	15	15	131	catalytic activity		metabolic process	371	38.6651	5.61768
A5CR56	CMM_1514	Uncharacterized protein OS=Clavibacter michiganensis subsp. michiganensis (strain NCPPB 382) GN=CMM_1514 PE=4 SV=1 - [A5CR56_CLAM3]	V.2.1	89.89	1	15	15	159				188	20.022	4.91943
A5CPU1	CMM_1051	Uncharacterized protein OS=Clavibacter michiganensis subsp. michiganensis (strain NCPPB 382) GN=CMM_1051 PE=4 SV=1 - [A5CPU1_CLAM3]	IV.3.2	41.22	1	14	14	58				575	59.6523	4.85596
A5CLM9	pCM2_0016	Uncharacterized protein OS=Clavibacter michiganensis subsp. michiganensis (strain NCPPB 382) GN=pCM2_0016 PE=4 SV=1 - [A5CLM9_CLAM3]	IV.2.5	71.35	1	14	14	106				349	35.815	5.19873
A5CQX1	CMM_1430	Malto-oligosyltrehalose trehalohydrolase OS=Clavibacter michiganensis subsp. michiganensis (strain NCPPB 382) GN=treZ PE=3 SV=1 - [A5CQX1_CLAM3]	I.1.5	35.67	1	14	14	81	catalytic activity	cytoplasm	metabolic process	600	65.8127	4.77979
A5CNE8	CMM_0560	Putative transcriptional regulator OS=Clavibacter michiganensis subsp. michiganensis (strain NCPPB 382) GN=CMM_0560 PE=4 SV=1 - [A5CNE8_CLAM3]	IV.3.1	47.93	1	14	14	246				411	42.4697	5.2876
A5CT78	CMM_2233	Fumarate hydratase class II OS=Clavibacter michiganensis subsp. michiganensis (strain NCPPB 382) GN=fumC PE=3 SV=1 - [A5CT78_CLAM3]	I.1.3	45.36	1	14	14	116	catalytic activity	cytoplasm	metabolic process	474	49.5986	5.19873
A5CPE2	CMM_0903	Aspartate-semialdehyde dehydrogenase OS=Clavibacter michiganensis subsp. michiganensis (strain NCPPB 382) GN=asdA PE=3 SV=1 - [A5CPE2_CLAM3]	I.2.5	50.68	1	14	15	102	catalytic activity; protein binding; nucleotide binding	cytoplasm	metabolic process	365	37.6537	5.03369
A5CLU9	CMM_0017	Penicillin-binding protein OS=Clavibacter michiganensis subsp. michiganensis (strain NCPPB 382) GN=pbpA PE=4 SV=1 - [A5CLU9_CLAM3]	II.2.1	39.75	1	13	13	67				483	50.1783	4.84326
A5CT06	CMM_2161	Peptidyl-prolyl cis-trans isomerase OS=Clavibacter michiganensis subsp. michiganensis (strain NCPPB 382) GN=CMM_2161 PE=4 SV=1 - [A5CT06_CLAM3]	IV.4.4	71.76	1	13	13	215	catalytic activity		metabolic process	340	33.7472	4.53857
A5CRL8	CMM_1675	Uncharacterized protein OS=Clavibacter michiganensis subsp. michiganensis (strain NCPPB 382) GN=CMM_1675 PE=4 SV=1 - [A5CRL8_CLAM3]	V.2.2	56.96	1	13	13	1218				158	16.6151	9.45166
A5CMQ3	CMM_0317	AgaA protein OS=Clavibacter michiganensis subsp. michiganensis (strain NCPPB 382) GN=agaA PE=4 SV=1 - [A5CMQ3_CLAM3]	I.1.8	51.86	1	25	25	93	catalytic activity		metabolic process	727	78.522	5.33838
A5CPG7	CMM_0927	DNA topoisomerase 1 OS=Clavibacter michiganensis subsp. michiganensis (strain NCPPB 382) GN=topA PE=3 SV=1 - [A5CPG7_CLAM3]	III.1.1	32.62	1	22	23	88	nucleotide binding; metal ion binding; DNA binding; catalytic activity	chromosome	metabolic process	984	106.018	8.17725
A5CPZ8	CMM_1108	Glutamate--tRNA ligase OS=Clavibacter michiganensis subsp. michiganensis (strain NCPPB 382) GN=gltX PE=3 SV=1 - [SYE_CLAM3]	III.3.2	47.43	1	19	19	90	RNA binding; nucleotide binding; catalytic activity	cytoplasm	metabolic process	506	55.9015	5.18604
A5CRQ7	CMM_1714	Putative trehalose synthase OS=Clavibacter michiganensis subsp. michiganensis (strain NCPPB 382) GN=CMM_1714 PE=4 SV=1 - [A5CRQ7_CLAM3]	I.1.8	43.28	1	18	18	72	catalytic activity		metabolic process	573	65.7273	4.95752
A5CTL6	CMM_2370	Methionine--tRNA ligase OS=Clavibacter michiganensis subsp. michiganensis (strain NCPPB 382) GN=metS PE=3 SV=1 - [A5CTL6_CLAM3]	III.3.2	39.05	1	18	18	69	nucleotide binding; catalytic activity; metal ion binding	cytoplasm	metabolic process	525	58.8677	5.18604
A5CTM6	CMM_2380	Putative 2-methylcitrate dehydratase OS=Clavibacter michiganensis subsp. michiganensis (strain NCPPB 382) GN=prpD PE=4 SV=1 - [A5CTM6_CLAM3]	I.1.5	54.07	1	17	17	70	catalytic activity		metabolic process	516	54.9052	5.97314
A5CNI3	CMM_0595	Ferrochelatase OS=Clavibacter michiganensis subsp. michiganensis (strain NCPPB 382) GN=hemH PE=3 SV=1 - [A5CNI3_CLAM3]	I.5.7	58.65	1	17	17	81	catalytic activity; metal ion binding	cytoplasm	metabolic process	416	45.2836	4.88135
A5CV98	CMM_2950	Putative adenylosuccinate lyase OS=Clavibacter michiganensis subsp. michiganensis (strain NCPPB 382) GN=purB PE=4 SV=1 - [A5CV98_CLAM3]	I.3.1	43.48	1	16	16	59	catalytic activity		metabolic process	460	50.4674	5.60498
A5CPN0	CMM_0990	Dihydrolipoamide dehydrogenase OS=Clavibacter michiganensis subsp. michiganensis (strain NCPPB 382) GN=lpdA PE=4 SV=1 - [A5CPN0_CLAM3]	I.1.3	54.37	1	16	16	92	catalytic activity; nucleotide binding	cytoplasm	metabolic process; cellular homeostasis; regulation of biological process	480	50.2009	5.65576
A5CTB7	CMM_2272	6-phosphogluconate dehydrogenase, decarboxylating OS=Clavibacter michiganensis subsp. michiganensis (strain NCPPB 382) GN=gndA2 PE=3 SV=1 - [A5CTB7_CLAM3]	I.1.2	44.42	1	16	16	84	catalytic activity; nucleotide binding		metabolic process	484	51.544	4.84326
A5CV63	CMM_2915	Putative Zn-dependant dehydrogenase OS=Clavibacter michiganensis subsp. michiganensis (strain NCPPB 382) GN=CMM_2915 PE=3 SV=1 - [A5CV63_CLAM3]	V.1.3	53.45	1	16	16	115	metal ion binding; catalytic activity		metabolic process	391	42.0551	4.95752
A5CS48	CMM_1856	Cell division protein FtsZ OS=Clavibacter michiganensis subsp. michiganensis (strain NCPPB 382) GN=ftsZ PE=3 SV=1 - [A5CS48_CLAM3]	II.1.1	58.84	1	15	15	124	nucleotide binding; catalytic activity	cytoplasm	cell organization and biogenesis; metabolic process; reproduction; cell division	379	38.5009	4.51318
A5CPH3	CMM_0933	Putative succinate-semialdehyde dehydrogenase OS=Clavibacter michiganensis subsp. michiganensis (strain NCPPB 382) GN=gabD PE=3 SV=1 - [A5CPH3_CLAM3]	I.1.5	40.73	1	14	14	80	catalytic activity		metabolic process	491	51.8548	4.97021
A5CRX8	CMM_1785	Dihydroorotase OS=Clavibacter michiganensis subsp. michiganensis (strain NCPPB 382) GN=pyrC PE=3 SV=1 - [A5CRX8_CLAM3]	I.3.2	50.85	1	14	14	75	catalytic activity; metal ion binding		metabolic process	470	49.1059	5.07178
A5CPL6	CMM_0976	Putative ABC transporter, substrate-binding protein OS=Clavibacter michiganensis subsp. michiganensis (strain NCPPB 382) GN=CMM_0976 PE=4 SV=1 - [A5CPL6_CLAM3]	IV.1.5	55.77	1	14	14	215		membrane		364	37.0774	4.33545
A5CQT6	CMM_1395	Conserved membrane protein OS=Clavibacter michiganensis subsp. michiganensis (strain NCPPB 382) GN=CMM_1395 PE=4 SV=1 - [A5CQT6_CLAM3]	V.2.1	38.29	1	13	13	78				619	63.4199	5.07178
A5CLX8	CMM_0044	Uncharacterized protein OS=Clavibacter michiganensis subsp. michiganensis (strain NCPPB 382) GN=ppaC PE=4 SV=1 - [A5CLX8_CLAM3]	IV.6.1	59.94	1	13	13	158	catalytic activity		metabolic process	337	35.0516	8.63135
A5CLT4	CMM_0002	DNA polymerase III subunit beta OS=Clavibacter michiganensis subsp. michiganensis (strain NCPPB 382) GN=dnaN PE=4 SV=1 - [A5CLT4_CLAM3]	III.1.2	32.38	1	12	12	56	DNA binding; catalytic activity	cytoplasm	metabolic process	383	41.4347	4.93213
A5CPM3	CMM_0983	AddA protein OS=Clavibacter michiganensis subsp. michiganensis (strain NCPPB 382) GN=addA PE=4 SV=1 - [A5CPM3_CLAM3]	I.3.1	39.52	1	12	12	75	catalytic activity		metabolic process	372	40.0782	4.56396
A5CLR7	pCM2_0054	Pat-1 protein OS=Clavibacter michiganensis subsp. michiganensis (strain NCPPB 382) GN=pat-1 PE=4 SV=1 - [A5CLR7_CLAM3]	IV.6.1	61.07	1	9	14	129	catalytic activity		metabolic process	280	29.638	8.07471
A5CLT9	CMM_0007	DNA gyrase subunit A OS=Clavibacter michiganensis subsp. michiganensis (strain NCPPB 382) GN=gyrA PE=3 SV=1 - [A5CLT9_CLAM3]	III.1.1	38.21	1	25	25	104	nucleotide binding; DNA binding; catalytic activity	chromosome; cytoplasm	metabolic process	895	98.0975	5.19873
A5CRU8	CMM_1755	DNA polymerase OS=Clavibacter michiganensis subsp. michiganensis (strain NCPPB 382) GN=polA1 PE=3 SV=1 - [A5CRU8_CLAM3]	III.1.2	44.07	1	24	24	72	DNA binding; catalytic activity		metabolic process	894	98.829	5.21143
A5CSV9	CMM_2114	Putative protease II (Oligopeptidase B) OS=Clavibacter michiganensis subsp. michiganensis (strain NCPPB 382) GN=ptrB PE=4 SV=1 - [A5CSV9_CLAM3]	IV.7.4	46.46	1	23	23	108	catalytic activity		metabolic process	721	79.9078	4.80518
A5CT08	CMM_2163	Putative 4-aminobutyrate aminotransferase OS=Clavibacter michiganensis subsp. michiganensis (strain NCPPB 382) GN=gabT PE=3 SV=1 - [A5CT08_CLAM3]	I.2.1	64.54	1	18	18	103	catalytic activity		metabolic process	471	49.2424	5.80811
A5CPL4	CMM_0974	ManC protein OS=Clavibacter michiganensis subsp. michiganensis (strain NCPPB 382) GN=manC PE=4 SV=1 - [A5CPL4_CLAM3]	I.1.10	70.51	1	18	18	92	catalytic activity		metabolic process	373	39.68	5.75732
A5CVB3	CMM_2964	Putative RNA nucleotidyltransferase OS=Clavibacter michiganensis subsp. michiganensis (strain NCPPB 382) GN=pcnA PE=4 SV=1 - [A5CVB3_CLAM3]	III.3.4	43.7	1	17	17	50	nucleotide binding; catalytic activity; RNA binding; metal ion binding		metabolic process	476	52.8607	5.8208
A5CSM6	CMM_2034	Putative hydrolase, metallo-beta-lactamase superfamily OS=Clavibacter michiganensis subsp. michiganensis (strain NCPPB 382) GN=CMM_2034 PE=4 SV=1 - [A5CSM6_CLAM3]	IV.5.6	45.7	1	17	17	81	RNA binding; catalytic activity; metal ion binding	cytoplasm	metabolic process	558	60.7008	6.15088
A5CPR7	CMM_1027	Putative mannose-6-phosphate isomerase OS=Clavibacter michiganensis subsp. michiganensis (strain NCPPB 382) GN=manA PE=3 SV=1 - [A5CPR7_CLAM3]	II.2.9	62.79	1	16	16	73	catalytic activity; metal ion binding		metabolic process	430	45.8016	5.0083
A5CRT5	CMM_1742	Triosephosphate isomerase OS=Clavibacter michiganensis subsp. michiganensis (strain NCPPB 382) GN=tpiA PE=3 SV=1 - [A5CRT5_CLAM3]	I.1.1	81.89	1	16	16	92	catalytic activity	cytoplasm	metabolic process	265	27.8074	5.45264
A5CRS3	CMM_1730	Uncharacterized protein OS=Clavibacter michiganensis subsp. michiganensis (strain NCPPB 382) GN=CMM_1730 PE=4 SV=1 - [A5CRS3_CLAM3]	IV.5.5	55.28	1	15	15	77			cell organization and biogenesis; metabolic process	407	43.1799	5.0083
A5CRR2	CMM_1719	Glucose-1-phosphate adenylyltransferase OS=Clavibacter michiganensis subsp. michiganensis (strain NCPPB 382) GN=glgC PE=3 SV=1 - [A5CRR2_CLAM3]	I.1.10	50.61	1	15	15	64	nucleotide binding; catalytic activity		metabolic process	413	44.9919	5.32568
A5CNX3	CMM_0734	Putative amidohydrolase OS=Clavibacter michiganensis subsp. michiganensis (strain NCPPB 382) GN=CMM_0734 PE=4 SV=1 - [A5CNX3_CLAM3]	V.1.6	70.25	1	15	15	87	catalytic activity		metabolic process	279	28.843	5.07178
A5CPE9	CMM_0910	Uncharacterized protein OS=Clavibacter michiganensis subsp. michiganensis (strain NCPPB 382) GN=CMM_0910 PE=4 SV=1 - [A5CPE9_CLAM3]	V.2.1	36.8	1	14	14	45				606	63.6319	4.93213
A5CNS8	CMM_0689	Adenylosuccinate synthetase OS=Clavibacter michiganensis subsp. michiganensis (strain NCPPB 382) GN=purA PE=3 SV=1 - [A5CNS8_CLAM3]	I.3.1	46.85	1	14	14	59	nucleotide binding; metal ion binding; catalytic activity	cytoplasm	metabolic process	429	46.4881	6.04932
A5CRR1	CMM_1718	Putative glycosyl transferase OS=Clavibacter michiganensis subsp. michiganensis (strain NCPPB 382) GN=CMM_1718 PE=4 SV=1 - [A5CRR1_CLAM3]	II.2.4	43.4	1	13	13	65	catalytic activity		metabolic process	394	42.2757	5.31299
A5CPP3	CMM_1003	N5-carboxyaminoimidazole ribonucleotide synthase OS=Clavibacter michiganensis subsp. michiganensis (strain NCPPB 382) GN=purK PE=3 SV=1 - [A5CPP3_CLAM3]	I.3.1	46.93	1	13	13	60	nucleotide binding; catalytic activity; metal ion binding		metabolic process	375	39.8156	5.40186
A5CU55	CMM_2559	Putative inosine-5'-monophosphate dehydrogenase OS=Clavibacter michiganensis subsp. michiganensis (strain NCPPB 382) GN=guaB1 PE=3 SV=1 - [A5CU55_CLAM3]	I.3.1	51.34	1	13	13	71	catalytic activity		metabolic process	372	39.3444	6.53662
A5CP97	CMM_0858	Putative UDP-glucose 4-epimerase OS=Clavibacter michiganensis subsp. michiganensis (strain NCPPB 382) GN=galE2 PE=4 SV=1 - [A5CP97_CLAM3]	I.1.1	50.85	1	13	13	93	catalytic activity		metabolic process	295	32.4041	4.95752
A5CTW4	CMM_2469	Phosphoserine transaminase OS=Clavibacter michiganensis subsp. michiganensis (strain NCPPB 382) GN=serC PE=4 SV=1 - [A5CTW4_CLAM3]	I.2.4	54.84	1	13	13	95	catalytic activity	cytoplasm	metabolic process	372	40.0584	5.09717
A5CQG9	CMM_1278	Putative serine protease OS=Clavibacter michiganensis subsp. michiganensis (strain NCPPB 382) GN=CMM_1278 PE=4 SV=1 - [A5CQG9_CLAM3]	IV.7.3	47.36	1	13	13	92	catalytic activity; protein binding		metabolic process	511	49.3658	4.67822
A5CNQ1	CMM_0662	NADP-dependent alcohol dehydrogenase OS=Clavibacter michiganensis subsp. michiganensis (strain NCPPB 382) GN=adhA PE=3 SV=1 - [A5CNQ1_CLAM3]	V.1.3	63.51	1	13	13	133	catalytic activity; metal ion binding		metabolic process	348	37.1806	4.95752
A5CM79	CMM_0144	Uncharacterized protein OS=Clavibacter michiganensis subsp. michiganensis (strain NCPPB 382) GN=CMM_0144 PE=4 SV=1 - [A5CM79_CLAM3]	V.2.1	69.72	1	12	12	124				327	33.5495	4.61475
A5CRL3	CMM_1670	Probable oxidoreductase OS=Clavibacter michiganensis subsp. michiganensis (strain NCPPB 382) GN=CMM_1670 PE=4 SV=1 - [A5CRL3_CLAM3]	V.1.3	65.23	1	12	13	117	catalytic activity		metabolic process	279	30.5656	4.83057
A5CQU6	CMM_1405	Conserved secreted protein OS=Clavibacter michiganensis subsp. michiganensis (strain NCPPB 382) GN=CMM_1405 PE=4 SV=1 - [A5CQU6_CLAM3]	V.2.1	35.22	1	11	11	68				460	47.4347	5.26221
A5CR99	CMM_1557	Putative secreted protein OS=Clavibacter michiganensis subsp. michiganensis (strain NCPPB 382) GN=CMM_1557 PE=4 SV=1 - [A5CR99_CLAM3]	V.2.2	63.32	1	11	11	331				259	27.4746	4.90674
A5CU43	CMM_2547	Succinyl-CoA ligase [ADP-forming] subunit alpha OS=Clavibacter michiganensis subsp. michiganensis (strain NCPPB 382) GN=sucD PE=3 SV=1 - [A5CU43_CLAM3]	I.1.3	49.15	1	11	11	294	nucleotide binding; catalytic activity		metabolic process	295	29.8816	5.33838
A5CS72	CMM_1880	Pyruvate carboxylase OS=Clavibacter michiganensis subsp. michiganensis (strain NCPPB 382) GN=pycA PE=4 SV=1 - [A5CS72_CLAM3]	I.1.3	27.8	1	23	23	77	nucleotide binding; catalytic activity; metal ion binding		metabolic process; transport	1133	121.447	5.24951
A5CS69	CMM_1877	Putative long-chain-fatty-acid-CoA ligase OS=Clavibacter michiganensis subsp. michiganensis (strain NCPPB 382) GN=CMM_1877 PE=4 SV=1 - [A5CS69_CLAM3]	I.4.1	54.93	1	21	21	67	catalytic activity		metabolic process	608	65.4899	5.8208
A5CR23	CMM_1482	Isoleucine--tRNA ligase OS=Clavibacter michiganensis subsp. michiganensis (strain NCPPB 382) GN=ileS PE=3 SV=1 - [A5CR23_CLAM3]	III.3.2	23.82	1	19	19	59	nucleotide binding; catalytic activity; metal ion binding	cytoplasm	metabolic process; regulation of biological process	1100	122.63	4.93213
A5CQ83	CMM_1192	Putative ATP-dependent RNA helicase OS=Clavibacter michiganensis subsp. michiganensis (strain NCPPB 382) GN=rhlE PE=3 SV=1 - [A5CQ83_CLAM3]	III.1.9	45.97	1	16	16	62	nucleotide binding; catalytic activity		metabolic process	509	54.8463	8.73389
A5CPS8	CMM_1038	Adenosylhomocysteinase OS=Clavibacter michiganensis subsp. michiganensis (strain NCPPB 382) GN=ahcY PE=3 SV=1 - [A5CPS8_CLAM3]	I.5.11	41.5	1	16	16	52	catalytic activity	cytoplasm	metabolic process	494	53.7334	5.021
A5CPY4	CMM_1038	Acetolactate synthase OS=Clavibacter michiganensis subsp. michiganensis (strain NCPPB 382) GN=ilvB PE=3 SV=1 - [A5CPY4_CLAM3]	I.5.11	44.18	1	16	16	80	metal ion binding; catalytic activity; nucleotide binding		metabolic process	627	66.8119	5.21143
A5CTA4	CMM_2259	Putative NADH dehydrogenase OS=Clavibacter michiganensis subsp. michiganensis (strain NCPPB 382) GN=CMM_2259 PE=4 SV=1 - [A5CTA4_CLAM3]	I.1.4	45.45	1	16	16	69	catalytic activity; nucleotide binding		metabolic process	495	52.8491	5.96045
A5CPT5	CMM_1045	Putative regulatory protein OS=Clavibacter michiganensis subsp. michiganensis (strain NCPPB 382) GN=CMM_1045 PE=4 SV=1 - [A5CPT5_CLAM3]	IV.3.6	52.68	1	15	15	56	nucleotide binding; DNA binding; protein binding; catalytic activity		metabolic process; regulation of biological process	317	34.3202	5.43994
A5CSH5	CMM_1983	CTP synthase OS=Clavibacter michiganensis subsp. michiganensis (strain NCPPB 382) GN=pyrG PE=3 SV=1 - [A5CSH5_CLAM3]	I.3.2	39.83	1	15	15	72	nucleotide binding; catalytic activity		metabolic process	580	62.4305	4.98291
A5CTL7	CMM_2371	Putative citrate synthase OS=Clavibacter michiganensis subsp. michiganensis (strain NCPPB 382) GN=gltA1 PE=3 SV=1 - [A5CTL7_CLAM3]	I.1.3	60.31	1	15	15	54	catalytic activity	cytoplasm	metabolic process	383	41.6133	5.35107
A5CPP5	CMM_1005	Putative transcriptional regulator OS=Clavibacter michiganensis subsp. michiganensis (strain NCPPB 382) GN=CMM_1005 PE=4 SV=1 - [A5CPP5_CLAM3]	IV.3.1	36.53	1	15	15	59				449	48.9426	7.92822
A5CQS1	CMM_1384	Elongation factor Ts OS=Clavibacter michiganensis subsp. michiganensis (strain NCPPB 382) GN=tsf PE=3 SV=1 - [EFTS_CLAM3]	III.3.3	68.73	1	15	15	88	RNA binding; protein binding	cytoplasm	metabolic process	275	29.2693	5.18604
A5CLU7	CMM_0015	PknB protein OS=Clavibacter michiganensis subsp. michiganensis (strain NCPPB 382) GN=pknB PE=3 SV=1 - [A5CLU7_CLAM3]	IV.3.7	48.63	1	15	15	83	nucleotide binding; catalytic activity; enzyme regulator activity	membrane	metabolic process	582	61.1533	5.0083
A5CV20	CMM_2873	Putative aminotransferase OS=Clavibacter michiganensis subsp. michiganensis (strain NCPPB 382) GN=CMM_2873 PE=3 SV=1 - [A5CV20_CLAM3]	I.2.1	53.38	1	14	14	73	catalytic activity		metabolic process	444	47.7262	5.18604
A5CSC5	CMM_1933	Putative arylesterase OS=Clavibacter michiganensis subsp. michiganensis (strain NCPPB 382) GN=CMM_1933 PE=4 SV=1 - [A5CSC5_CLAM3]	V.1.6	64.39	1	14	14	81	catalytic activity; antioxidant activity		metabolic process	278	30.043	5.14795
A5CTB9	CMM_2274	Ribose-phosphate pyrophosphokinase OS=Clavibacter michiganensis subsp. michiganensis (strain NCPPB 382) GN=prsA PE=3 SV=1 - [A5CTB9_CLAM3]	I.3.1	44	1	13	13	52	nucleotide binding; metal ion binding; catalytic activity	cytoplasm	metabolic process	325	35.4506	6.29053
A5CTV6	CMM_2461	Uncharacterized protein OS=Clavibacter michiganensis subsp. michiganensis (strain NCPPB 382) GN=CMM_2461 PE=4 SV=1 - [A5CTV6_CLAM3]	III.3.4	51.54	1	13	13	85	RNA binding			260	28.7375	5.13525
A5CPB9	CMM_0880	Putative sugar ABC transporter, ATPase component OS=Clavibacter michiganensis subsp. michiganensis (strain NCPPB 382) GN=CMM_0880 PE=3 SV=1 - [A5CPB9_CLAM3]	IV.1.5	31.43	1	13	13	56	nucleotide binding; catalytic activity		metabolic process	509	54.988	6.0874
A5CPC2	CMM_0883	Beta-glucosidase OS=Clavibacter michiganensis subsp. michiganensis (strain NCPPB 382) GN=bglJ PE=3 SV=1 - [A5CPC2_CLAM3]	I.1.8	28.6	1	13	13	51	catalytic activity		metabolic process	500	54.479	4.95752
A5CS65	CMM_1873	Putative eukaryotic-type serine/threonine protein kinase OS=Clavibacter michiganensis subsp. michiganensis (strain NCPPB 382) GN=pknE PE=4 SV=1 - [A5CS65_CLAM3]	IV.3.7	26.04	1	13	13	66	catalytic activity; nucleotide binding; enzyme regulator activity	membrane	metabolic process	649	68.4772	5.12256
A5CPK8	CMM_0968	Phosphoenolpyruvate-protein phosphotransferase OS=Clavibacter michiganensis subsp. michiganensis (strain NCPPB 382) GN=ptsA PE=3 SV=1 - [A5CPK8_CLAM3]	IV.1.20	42.29	1	13	14	60	catalytic activity; transporter activity; metal ion binding	cytoplasm	transport; metabolic process	551	56.5485	4.67822
A5CPN5	CMM_0995	Putative two component system, response regulator OS=Clavibacter michiganensis subsp. michiganensis (strain NCPPB 382) GN=CMM_0995 PE=4 SV=1 - [A5CPN5_CLAM3]	IV.3.2	62.39	1	12	12	43	signal transducer activity; DNA binding		regulation of biological process; response to stimulus	234	24.5309	5.24951
A5CRT1	CMM_1738	Putative Glucose-6-phosphate dehydrogenase assembly protein OpcA OS=Clavibacter michiganensis subsp. michiganensis (strain NCPPB 382) GN=opcA PE=4 SV=1 - [A5CRT1_CLAM3]	I.1.1	47.29	1	12	12	55				332	35.4025	5.97314
A5CNH5	CMM_0587	Uroporphyrinogen decarboxylase OS=Clavibacter michiganensis subsp. michiganensis (strain NCPPB 382) GN=hemE PE=3 SV=1 - [A5CNH5_CLAM3]	I.5.7	50.4	1	12	12	63	catalytic activity	cytoplasm	metabolic process	375	39.5257	6.02393
A5CU82	CMM_2586	30S ribosomal protein S13 OS=Clavibacter michiganensis subsp. michiganensis (strain NCPPB 382) GN=rpsM PE=3 SV=1 - [A5CU82_CLAM3]	III.3.1	56.45	1	12	12	53	RNA binding; structural molecule activity	ribosome	metabolic process	124	14.0057	10.3013
A5CSV5	CMM_2110	Putative sugar alcohol dehydrogenase OS=Clavibacter michiganensis subsp. michiganensis (strain NCPPB 382) GN=CMM_2110 PE=4 SV=1 - [A5CSV5_CLAM3]	V.1.3	39.25	1	12	12	57	catalytic activity; nucleotide binding	membrane	metabolic process	428	46.3126	4.85596
A5CPC1	CMM_0882	Xylose isomerase OS=Clavibacter michiganensis subsp. michiganensis (strain NCPPB 382) GN=xylA PE=3 SV=1 - [XYLA_CLAM3]	I.1.2	39.8	1	12	12	70	metal ion binding; catalytic activity	cytoplasm	metabolic process	397	43.8099	4.89404
A5CUC4	CMM_2628	Putative polar amino acid ABC transporter,substrate-binding protein OS=Clavibacter michiganensis subsp. michiganensis (strain NCPPB 382) GN=CMM_2628 PE=3 SV=1 - [A5CUC4_CLAM3]	IV.1.4	68.09	1	12	12	60	receptor activity; signal transducer activity; transporter activity	membrane	transport	282	29.0696	4.50049
A5CRH7	CMM_1634	Putative glutamine synthetase II OS=Clavibacter michiganensis subsp. michiganensis (strain NCPPB 382) GN=glnA2 PE=3 SV=1 - [A5CRH7_CLAM3]	I.2.2	48.54	1	12	12	86	catalytic activity		metabolic process	445	49.5428	5.19873
A5CS11	CMM_1819	Pyridoxal 5'-phosphate synthase subunit PdxS OS=Clavibacter michiganensis subsp. michiganensis (strain NCPPB 382) GN=pdxS PE=3 SV=1 - [A5CS11_CLAM3]	I.5.2	45.33	1	12	12	133	catalytic activity; nucleotide binding		metabolic process	300	31.5452	5.12256
A5CUG0	CMM_2664	Uncharacterized protein OS=Clavibacter michiganensis subsp. michiganensis (strain NCPPB 382) GN=CMM_2664 PE=4 SV=1 - [A5CUG0_CLAM3]	V.2.1	63.79	1	11	11	70				243	27.5117	5.88428
A5CPS1	CMM_1031	Putative secreted protein OS=Clavibacter michiganensis subsp. michiganensis (strain NCPPB 382) GN=CMM_1031 PE=4 SV=1 - [A5CPS1_CLAM3]	V.2.1	67.94	1	11	11	55				499	47.8376	4.51318
A5CTT0	CMM_2434	Putative secreted serine protease, family S1C OS=Clavibacter michiganensis subsp. michiganensis (strain NCPPB 382) GN=CMM_2434 PE=4 SV=1 - [A5CTT0_CLAM3]	IV.7.3	53.55	1	11	11	112	catalytic activity; protein binding		metabolic process	394	37.56	4.52588
A5CPK1	CMM_0961	Riboflavin biosynthesis protein RibBA OS=Clavibacter michiganensis subsp. michiganensis (strain NCPPB 382) GN=ribAB PE=3 SV=1 - [A5CPK1_CLAM3]	I.5.3	39.41	1	11	11	55	nucleotide binding; catalytic activity; metal ion binding		metabolic process	444	47.5662	4.90674
A5CUT5	CMM_2788	Transcription termination/antitermination protein NusG OS=Clavibacter michiganensis subsp. michiganensis (strain NCPPB 382) GN=nusG PE=3 SV=1 - [A5CUT5_CLAM3]	III.2.1	32.35	1	11	11	81			metabolic process; regulation of biological process	340	37.1801	4.27197
A5CP31	CMM_0792	Putative sugar ABC transporter, solute-binding protein OS=Clavibacter michiganensis subsp. michiganensis (strain NCPPB 382) GN=CMM_0792 PE=4 SV=1 - [A5CP31_CLAM3]	IV.1.5	54.15	1	11	11	98			metabolic process	325	32.8024	4.53857
A5CUT0	CMM_2783	Putative sugar ABC transporter, substrate binding protein OS=Clavibacter michiganensis subsp. michiganensis (strain NCPPB 382) GN=CMM_2783 PE=4 SV=1 - [A5CUT0_CLAM3]	IV.1.5	38.31	1	11	11	98	transporter activity		transport	449	47.3284	4.44971
A5CU01	CMM_2505	Phosphate-binding protein PstS OS=Clavibacter michiganensis subsp. michiganensis (strain NCPPB 382) GN=pstS PE=3 SV=1 - [A5CU01_CLAM3]	IV.1.7	47.12	1	11	11	95			transport	365	36.9774	4.52588
A5CNA4	CMM_0517	Putative transcriptional regulator, LytR family OS=Clavibacter michiganensis subsp. michiganensis (strain NCPPB 382) GN=CMM_0517 PE=4 SV=1 - [A5CNA4_CLAM3]	IV.3.1	44.36	1	11	11	100				381	38.8227	5.14795
A5CPI3	CMM_0944	Putative sugar ABC transporter, substrate-binding protein OS=Clavibacter michiganensis subsp. michiganensis (strain NCPPB 382) GN=CMM_0944 PE=4 SV=1 - [A5CPI3_CLAM3]	IV.1.5	35.07	1	10	10	52	transporter activity		transport	422	44.0054	4.55127
A5CQK5	CMM_1314	Putative iron ABC transporter, substrate-binding protein OS=Clavibacter michiganensis subsp. michiganensis (strain NCPPB 382) GN=CMM_1314 PE=4 SV=1 - [A5CQK5_CLAM3]	IV.1.7	41.39	1	10	10	40	transporter activity		transport	360	38.124	4.55127
A5CQ02	CMM_1112	Putative K+ channel protein, beta subunit OS=Clavibacter michiganensis subsp. michiganensis (strain NCPPB 382) GN=CMM_1112 PE=4 SV=1 - [A5CQ02_CLAM3]	IV.1.10	45.54	1	10	13	70				336	36.8455	4.90674
A5CPZ4	CMM_1104	3-isopropylmalate dehydrogenase OS=Clavibacter michiganensis subsp. michiganensis (strain NCPPB 382) GN=leuB PE=3 SV=1 - [LEU3_CLAM3]	I.2.5	38.87	1	10	10	70	metal ion binding; catalytic activity; nucleotide binding	cytoplasm	metabolic process	355	37.1564	5.32568
A5CNP2	CMM_0653	Cysteine synthase OS=Clavibacter michiganensis subsp. michiganensis (strain NCPPB 382) GN=cysK PE=3 SV=1 - [A5CNP2_CLAM3]	I.2.8	45.83	1	10	10	88	catalytic activity		metabolic process	312	32.8301	4.84326
A5CPD4	CMM_0895	Phosphate acetyltransferase OS=Clavibacter michiganensis subsp. michiganensis (strain NCPPB 382) GN=ptaA PE=3 SV=1 - [A5CPD4_CLAM3]	I.1.7	35.74	1	17	17	61	catalytic activity	cytoplasm	metabolic process	705	74.3169	4.91943
A5CPE1	CMM_0902	Aspartokinase OS=Clavibacter michiganensis subsp. michiganensis (strain NCPPB 382) GN=lysC PE=3 SV=1 - [A5CPE1_CLAM3]	I.2.5	56.53	1	15	15	77	catalytic activity		metabolic process	421	43.8418	5.18604
A5CTY3	CMM_2488	Cysteine--tRNA ligase OS=Clavibacter michiganensis subsp. michiganensis (strain NCPPB 382) GN=cysS PE=3 SV=1 - [SYC_CLAM3]	III.3.2	40.7	1	14	14	50	nucleotide binding; catalytic activity; metal ion binding	cytoplasm	metabolic process	484	52.8855	5.43994
A5CQ80	CMM_1189	Putative Xaa-Pro aminopeptidase OS=Clavibacter michiganensis subsp. michiganensis (strain NCPPB 382) GN=pepP2 PE=3 SV=1 - [A5CQ80_CLAM3]	I.2.10	33.33	1	14	14	54	catalytic activity; metal ion binding		metabolic process	540	57.7297	4.84326
A5CSC1	CMM_1929	Putative quinone oxidoreductase OS=Clavibacter michiganensis subsp. michiganensis (strain NCPPB 382) GN=CMM_1929 PE=4 SV=1 - [A5CSC1_CLAM3]	I.1.4	76.02	1	14	14	64	catalytic activity; metal ion binding		metabolic process	342	34.8092	5.18604
A5CUI6	CMM_2692	Putative endoglucanase OS=Clavibacter michiganensis subsp. michiganensis (strain NCPPB 382) GN=CMM_2692 PE=4 SV=1 - [A5CUI6_CLAM3]	IV.6.3	55.22	1	14	14	61	catalytic activity		metabolic process	469	47.5334	9.43701
A5CPQ0	CMM_1010	dTDP-glucose 4,6-dehydratase OS=Clavibacter michiganensis subsp. michiganensis (strain NCPPB 382) GN=rmlB PE=3 SV=1 - [A5CPQ0_CLAM3]	II.2.9	65.35	1	14	14	68	catalytic activity		metabolic process	329	36.8455	5.35107
A5CRY9	CMM_1796	3-dehydroquinate synthase OS=Clavibacter michiganensis subsp. michiganensis (strain NCPPB 382) GN=aroB PE=3 SV=1 - [A5CRY9_CLAM3]	I.2.7	44.83	1	13	13	42	catalytic activity	cytoplasm	metabolic process	377	40.3872	5.78271
A5CTP1	CMM_2395	Putative alpha glycosidase OS=Clavibacter michiganensis subsp. michiganensis (strain NCPPB 382) GN=aglB PE=4 SV=1 - [A5CTP1_CLAM3]	I.1.8	31.15	1	13	13	62	catalytic activity		metabolic process	748	81.3155	4.71631
A5CTB6	CMM_2271	Putative gluconokinase/dehydrogenase OS=Clavibacter michiganensis subsp. michiganensis (strain NCPPB 382) GN=CMM_2271 PE=4 SV=1 - [A5CTB6_CLAM3]	I.1.2	35.43	1	13	13	62	catalytic activity; nucleotide binding		metabolic process	669	70.1678	5.03369
A5CUF9	CMM_2663	Putative oxidoreductase OS=Clavibacter michiganensis subsp. michiganensis (strain NCPPB 382) GN=CMM_2663 PE=4 SV=1 - [A5CUF9_CLAM3]	V.1.3	46.3	1	13	13	63	catalytic activity		metabolic process	378	40.3388	5.08447
A5CQ45	CMM_1154	Threonine synthase OS=Clavibacter michiganensis subsp. michiganensis (strain NCPPB 382) GN=thrC PE=3 SV=1 - [A5CQ45_CLAM3]	I.2.5	51.4	1	13	13	71	catalytic activity		metabolic process	358	37.2452	5.51611
A5CSS0	CMM_2077	Putative aspartate ammonia-lyase OS=Clavibacter michiganensis subsp. michiganensis (strain NCPPB 382) GN=aspA PE=4 SV=1 - [A5CSS0_CLAM3]	I.2.2	42.18	1	13	13	90	catalytic activity		metabolic process	505	53.2185	5.46533
A5CTX0	CMM_2475	Putative two component system response regulator OS=Clavibacter michiganensis subsp. michiganensis (strain NCPPB 382) GN=CMM_2475 PE=4 SV=1 - [A5CTX0_CLAM3]	IV.3.2	60.87	1	13	13	83	signal transducer activity; DNA binding		regulation of biological process; response to stimulus; metabolic process	230	25.5813	5.021
A5CS94	CMM_1902	Uncharacterized protein OS=Clavibacter michiganensis subsp. michiganensis (strain NCPPB 382) GN=CMM_1902 PE=4 SV=1 - [A5CS94_CLAM3]	V.2.1	35.61	1	12	12	37	catalytic activity		metabolic process	497	50.4339	4.94482
A5CRL0	CMM_1667	Sulfurtransferase OS=Clavibacter michiganensis subsp. michiganensis (strain NCPPB 382) GN=sseA PE=4 SV=1 - [A5CRL0_CLAM3]	I.2.8	49.5	1	12	12	49	catalytic activity		metabolic process	303	33.6748	4.84326
A5CNZ3	CMM_0754	Phosphoribosylamine--glycine ligase OS=Clavibacter michiganensis subsp. michiganensis (strain NCPPB 382) GN=purD PE=3 SV=1 - [A5CNZ3_CLAM3]	I.3.1	36.06	1	12	12	55	nucleotide binding; metal ion binding; catalytic activity		metabolic process	416	42.9495	4.79248
A5CNW2	CMM_0723	Putative acyltransferase OS=Clavibacter michiganensis subsp. michiganensis (strain NCPPB 382) GN=wcnB PE=4 SV=1 - [A5CNW2_CLAM3]	II.2.7	24.31	1	12	12	50	catalytic activity	membrane	metabolic process	757	80.5206	6.40479
A5CT09	CMM_2164	Putative asparaginase II OS=Clavibacter michiganensis subsp. michiganensis (strain NCPPB 382) GN=CMM_2164 PE=4 SV=1 - [A5CT09_CLAM3]	I.2.2	43.15	1	12	12	53				336	34.9162	6.27783
A5CSQ2	CMM_2060	Putative cysteine peptidase, family C56 OS=Clavibacter michiganensis subsp. michiganensis (strain NCPPB 382) GN=CMM_2060 PE=4 SV=1 - [A5CSQ2_CLAM3]	IV.7.2	84.57	1	12	12	82	catalytic activity		metabolic process	188	20.126	4.42432
A5CLT5	CMM_0003	6-phosphogluconate dehydrogenase OS=Clavibacter michiganensis subsp. michiganensis (strain NCPPB 382) GN=gndA1 PE=4 SV=1 - [A5CLT5_CLAM3]	I.1.2	58.31	1	12	12	94	catalytic activity; nucleotide binding		metabolic process	295	31.6219	4.95752
A5CTY0	CMM_2485	Putative sugar ABC transporter, ATP-binding protein OS=Clavibacter michiganensis subsp. michiganensis (strain NCPPB 382) GN=CMM_2485 PE=4 SV=1 - [A5CTY0_CLAM3]	IV.1.5	51.37	1	12	12	171	nucleotide binding; transporter activity; catalytic activity		metabolic process; transport	366	39.2833	5.59229
A5CLY7	CMM_0052	Putative extracellular serine protease, family S1 (Chymotrypsin) OS=Clavibacter michiganensis subsp. michiganensis (strain NCPPB 382) GN=chpC PE=4 SV=1 - [A5CLY7_CLAM3]	IV.6.1	72.03	1	11	11	67	catalytic activity		metabolic process	286	31.4468	8.20654
A5CPH0	CMM_0930	Uncharacterized protein OS=Clavibacter michiganensis subsp. michiganensis (strain NCPPB 382) GN=CMM_0930 PE=4 SV=1 - [A5CPH0_CLAM3]	IV.7.3	36.57	1	11	11	36	catalytic activity		metabolic process	525	55.2117	4.4624
A5CPB5	CMM_0876	Ribulokinase OS=Clavibacter michiganensis subsp. michiganensis (strain NCPPB 382) GN=araB PE=3 SV=1 - [A5CPB5_CLAM3]	I.1.2	37.04	1	11	11	61	nucleotide binding; catalytic activity		metabolic process	567	60.0761	4.90674
A5CSB7	CMM_1925	Putative monooxygenase/oxidoreductase OS=Clavibacter michiganensis subsp. michiganensis (strain NCPPB 382) GN=CMM_1925 PE=4 SV=1 - [A5CSB7_CLAM3]	V.1.3	41.52	1	11	11	44	catalytic activity		metabolic process	342	37.134	5.36377
A5CSE0	CMM_1948	Putative extracellular serine protease OS=Clavibacter michiganensis subsp. michiganensis (strain NCPPB 382) GN=ppaI PE=4 SV=1 - [A5CSE0_CLAM3]	IV.6.1	60.87	1	11	11	75	catalytic activity		metabolic process	322	33.3577	4.65283
A5CQ03	CMM_1113	Putative potassium channel protein subunit OS=Clavibacter michiganensis subsp. michiganensis (strain NCPPB 382) GN=CMM_1113 PE=4 SV=1 - [A5CQ03_CLAM3]	IV.1.10	47.02	1	11	14	77				336	36.8487	4.94482
A5CQN6	CMM_1345	Glycerol-3-phosphate dehydrogenase [NAD(P)+] OS=Clavibacter michiganensis subsp. michiganensis (strain NCPPB 382) GN=gpsA PE=3 SV=1 - [A5CQN6_CLAM3]	I.1.6	50	1	11	11	52	catalytic activity; nucleotide binding	cytoplasm	metabolic process	350	36.646	4.97021
A5CNN2	CMM_0643	Putative oxidoreductase OS=Clavibacter michiganensis subsp. michiganensis (strain NCPPB 382) GN=CMM_0643 PE=4 SV=1 - [A5CNN2_CLAM3]	V.1.3	52.38	1	11	11	68	catalytic activity; nucleotide binding		metabolic process	357	38.0603	4.77979
A5CU99	CMM_2603	50S ribosomal protein L6 OS=Clavibacter michiganensis subsp. michiganensis (strain NCPPB 382) GN=rplF PE=3 SV=1 - [RL6_CLAM3]	III.3.1	74.16	1	11	11	78	RNA binding; structural molecule activity	ribosome	metabolic process	178	19.0033	9.75928
A5CPM9	CMM_0989	Purine nucleoside phosphorylase OS=Clavibacter michiganensis subsp. michiganensis (strain NCPPB 382) GN=punA PE=3 SV=1 - [A5CPM9_CLAM3]	I.3.1	63.64	1	11	11	66	catalytic activity		metabolic process	275	28.8439	5.85889
A5CV89	CMM_2941	Putative metal ABC transporter, substrate-binding protein OS=Clavibacter michiganensis subsp. michiganensis (strain NCPPB 382) GN=CMM_2941 PE=3 SV=1 - [A5CV89_CLAM3]	IV.1.7	56.15	1	11	11	152	metal ion binding		transport	317	32.4311	4.37354
A5CS62	CMM_1870	Putative geranylgeranyl pyrophosphate synthase OS=Clavibacter michiganensis subsp. michiganensis (strain NCPPB 382) GN=CMM_1870 PE=3 SV=1 - [A5CS62_CLAM3]	I.6.4	35.39	1	10	11	28	catalytic activity		metabolic process	373	40.3331	5.43994
A5CSD9	CMM_1947	Putative extracellular serine protease OS=Clavibacter michiganensis subsp. michiganensis (strain NCPPB 382) GN=ppaH PE=4 SV=1 - [A5CSD9_CLAM3]	IV.6.1	63.03	1	10	10	67	catalytic activity		metabolic process	330	33.592	4.56396
A5CRZ7	CMM_1804	30S ribosomal protein S4 OS=Clavibacter michiganensis subsp. michiganensis (strain NCPPB 382) GN=rpsD PE=3 SV=1 - [RS4_CLAM3]	III.3.1	50.72	1	10	10	51	RNA binding; structural molecule activity	ribosome	metabolic process	209	23.639	10.4624
A5CML4	CMM_0278	Putative chorismate mutase OS=Clavibacter michiganensis subsp. michiganensis (strain NCPPB 382) GN=CMM_0278 PE=4 SV=1 - [A5CML4_CLAM3]	I.2.7	69.9	1	10	10	107			metabolic process	196	20.0346	7.34229
A5CUI5	CMM_2688	Uncharacterized protein OS=Clavibacter michiganensis subsp. michiganensis (strain NCPPB 382) GN=CMM_2688 PE=4 SV=1 - [A5CUI5_CLAM3]	I.1.5	88.5	1	10	10	174	catalytic activity		metabolic process	226	24.0025	4.58936
A5CLW6	CMM_0034	Putative sugar phosphate isomerase/epimerase OS=Clavibacter michiganensis subsp. michiganensis (strain NCPPB 382) GN=CMM_0034 PE=4 SV=1 - [A5CLW6_CLAM3]	I.1.12	61.57	1	10	10	85	catalytic activity		metabolic process	268	28.8005	4.58936
A5CTH4	CMM_2328	Uncharacterized protein OS=Clavibacter michiganensis subsp. michiganensis (strain NCPPB 382) GN=CMM_2328 PE=4 SV=1 - [A5CTH4_CLAM3]	V.2.2	32.4	1	9	9	33				463	47.8275	4.67822
A5CM44	CMM_0109	Putative sugar ABC transporter, binding protein OS=Clavibacter michiganensis subsp. michiganensis (strain NCPPB 382) GN=CMM_0109 PE=4 SV=1 - [A5CM44_CLAM3]	IV.1.4	28.32	1	9	9	40	transporter activity		transport	452	48.3478	4.43701
A5CRB5	CMM_1573	Putative two-component system, response regulator OS=Clavibacter michiganensis subsp. michiganensis (strain NCPPB 382) GN=CMM_1573 PE=4 SV=1 - [A5CRB5_CLAM3]	IV.3.2	58.77	1	9	9	48	signal transducer activity; DNA binding		regulation of biological process; response to stimulus; metabolic process	228	24.685	6.22705
A5CPW4	CMM_1074	Glucose-6-phosphate 1-dehydrogenase OS=Clavibacter michiganensis subsp. michiganensis (strain NCPPB 382) GN=zwfB PE=3 SV=1 - [A5CPW4_CLAM3]	I.1.2	29.35	1	9	9	47	catalytic activity; nucleotide binding		metabolic process	460	49.5973	4.83057
A5CLL8	pCM2_0007	Uncharacterized protein OS=Clavibacter michiganensis subsp. michiganensis (strain NCPPB 382) GN=pCM2_0007 PE=4 SV=1 - [A5CLL8_CLAM3]	V.2.1	78.21	1	9	12	86				257	27.0144	5.41455
A5CMT1	CMM_0345	Conserved exported protein OS=Clavibacter michiganensis subsp. michiganensis (strain NCPPB 382) GN=CMM_0345 PE=4 SV=1 - [A5CMT1_CLAM3]	V.2.1	47.92	1	9	10	95				313	32.3307	5.47803
A5CRZ9	CMM_1807	Uncharacterized protein OS=Clavibacter michiganensis subsp. michiganensis (strain NCPPB 382) GN=CMM_1807 PE=4 SV=1 - [A5CRZ9_CLAM3]	V.2.1	52.44	1	21	21	79				410	45.4497	5.68115
A5CRC3	CMM_1581	Glycine--tRNA ligase OS=Clavibacter michiganensis subsp. michiganensis (strain NCPPB 382) GN=glyS PE=3 SV=1 - [A5CRC3_CLAM3]	III.3.2	48.81	1	18	18	70	nucleotide binding; catalytic activity	cytoplasm	metabolic process	461	52.3843	5.57959
A5CS56	CMM_1864	UDP-N-acetylmuramyl-tripeptide synthetase OS=Clavibacter michiganensis subsp. michiganensis (strain NCPPB 382) GN=murE PE=3 SV=1 - [A5CS56_CLAM3]	II.2.1	45.14	1	17	17	75	nucleotide binding; catalytic activity	cytoplasm	regulation of biological process; metabolic process; cell division; cell organization and biogenesis	514	54.5778	4.91943
A5CPR1	CMM_1021	Putative glycosyltransferase OS=Clavibacter michiganensis subsp. michiganensis (strain NCPPB 382) GN=wcqJ PE=4 SV=1 - [A5CPR1_CLAM3]	II.2.9	33.63	1	16	16	46	catalytic activity		metabolic process	672	74.7873	8.52881
A5CTA9	CMM_2264	HisS protein OS=Clavibacter michiganensis subsp. michiganensis (strain NCPPB 382) GN=hisS PE=3 SV=1 - [A5CTA9_CLAM3]	III.3.2	43.45	1	15	15	50	nucleotide binding; catalytic activity	cytoplasm	metabolic process	435	45.785	5.24951
A5CV18	CMM_2871	PgaA protein OS=Clavibacter michiganensis subsp. michiganensis (strain NCPPB 382) GN=pgaA PE=3 SV=1 - [A5CV18_CLAM3]	IV.6.3	62.3	1	15	15	43	catalytic activity		metabolic process	496	49.2601	5.5415
A5CP94	CMM_0854	Lysine--tRNA ligase OS=Clavibacter michiganensis subsp. michiganensis (strain NCPPB 382) GN=lysS PE=3 SV=1 - [A5CP94_CLAM3]	III.3.2	37.82	1	14	14	53	nucleotide binding; metal ion binding; catalytic activity	cytoplasm	metabolic process	513	55.9424	5.07178
A5CSM9	CMM_2037	Thymidylate synthase ThyX OS=Clavibacter michiganensis subsp. michiganensis (strain NCPPB 382) GN=thyX PE=3 SV=1 - [A5CSM9_CLAM3]	I.3.2	63.5	1	14	14	51	catalytic activity; nucleotide binding		metabolic process	263	30.0759	5.8335
A5CV01	CMM_2854	Uncharacterized protein OS=Clavibacter michiganensis subsp. michiganensis (strain NCPPB 382) GN=CMM_2854 PE=4 SV=1 - [A5CV01_CLAM3]	II.1.2	37.98	1	14	14	44				603	63.0935	4.77979
A5CM06	CMM_0071	PpaE protein OS=Clavibacter michiganensis subsp. michiganensis (strain NCPPB 382) GN=ppaE PE=4 SV=1 - [A5CM06_CLAM3]	IV.6.1	73.58	1	14	14	200	catalytic activity		metabolic process	318	32.5826	8.19189
A5CLU2	CMM_0010	Peptidyl-prolyl cis-trans isomerase OS=Clavibacter michiganensis subsp. michiganensis (strain NCPPB 382) GN=ppiA PE=3 SV=1 - [A5CLU2_CLAM3]	IV.4.4	77.09	1	14	14	208	catalytic activity		metabolic process	179	19.3306	5.71924
A5CQ89	CMM_1198	Putative phosphotransferase OS=Clavibacter michiganensis subsp. michiganensis (strain NCPPB 382) GN=CMM_1198 PE=4 SV=1 - [A5CQ89_CLAM3]	IV.1.20	57.54	1	13	13	60	catalytic activity		metabolic process	358	38.0485	5.12256
A5CT26	CMM_2181	Putative peptide ABC transporter, ATP-binding protein OS=Clavibacter michiganensis subsp. michiganensis (strain NCPPB 382) GN=CMM_2181 PE=3 SV=1 - [A5CT26_CLAM3]	IV.1.4	38.72	1	13	13	47	nucleotide binding; catalytic activity		metabolic process; transport	563	61.1103	6.16357
A5CRM3	CMM_1680	Short chain dehydrogenase/oxidoreduxtase OS=Clavibacter michiganensis subsp. michiganensis (strain NCPPB 382) GN=CMM_1680 PE=4 SV=1 - [A5CRM3_CLAM3]	V.1.3	49.03	1	13	13	56	catalytic activity		metabolic process	259	27.7222	4.93213
A5CSJ3	CMM_2003	Phenylalanine--tRNA ligase alpha subunit OS=Clavibacter michiganensis subsp. michiganensis (strain NCPPB 382) GN=pheS PE=3 SV=1 - [A5CSJ3_CLAM3]	III.3.2	49.86	1	13	13	45	RNA binding; nucleotide binding; metal ion binding; catalytic activity	cytoplasm	metabolic process	345	37.9638	5.14795
A5CS55	CMM_1863	UDP-N-acetylmuramoyl-tripeptide--D-alanyl-D-alanine ligase OS=Clavibacter michiganensis subsp. michiganensis (strain NCPPB 382) GN=murF PE=3 SV=1 - [A5CS55_CLAM3]	II.2.1	49.68	1	13	13	58	nucleotide binding; catalytic activity	cytoplasm	regulation of biological process; metabolic process; cell division; cell organization and biogenesis	469	49.5731	5.10986
A5CSI9	CMM_2001	N-acetyl-gamma-glutamyl-phosphate reductase OS=Clavibacter michiganensis subsp. michiganensis (strain NCPPB 382) GN=argC PE=3 SV=1 - [ARGC_CLAM3]	I.2.3	57.31	1	13	13	67	catalytic activity; protein binding; nucleotide binding	cytoplasm	metabolic process	349	36.0096	5.45264
A5CMQ7	CMM_0321	Putative oxidoreductase OS=Clavibacter michiganensis subsp. michiganensis (strain NCPPB 382) GN=CMM_0321 PE=4 SV=1 - [A5CMQ7_CLAM3]	V.1.3	63.17	1	13	13	52				334	35.9952	5.64307
A5CS66	CMM_1874	Putative phospho-2-dehydro-3-deoxyheptonate aldolase OS=Clavibacter michiganensis subsp. michiganensis (strain NCPPB 382) GN=aroG PE=4 SV=1 - [A5CS66_CLAM3]	I.2.7	41.23	1	13	13	53	catalytic activity		metabolic process	456	49.8131	5.87158
A5CT71	CMM_2226	Putative fructose-bisphosphate aldolase OS=Clavibacter michiganensis subsp. michiganensis (strain NCPPB 382) GN=fbaA PE=4 SV=1 - [A5CT71_CLAM3]	I.1.1	63.34	1	13	13	70	catalytic activity; metal ion binding		metabolic process	341	36.3201	5.12256
A5CU88	CMM_2592	Phosphoenolpyruvate-protein phosphotransferase OS=Clavibacter michiganensis subsp. michiganensis (strain NCPPB 382) GN=CMM_2592 PE=3 SV=1 - [A5CU88_CLAM3]	IV.1.20	41.73	1	13	14	66	catalytic activity; transporter activity; metal ion binding	cytoplasm	transport; metabolic process	556	56.9466	4.70361
A5CSU3	CMM_2098	Putative short chain dehydrogenase/oxidoreductase OS=Clavibacter michiganensis subsp. michiganensis (strain NCPPB 382) GN=CMM_2098 PE=4 SV=1 - [A5CSU3_CLAM3]	V.1.3	59.73	1	13	13	122	catalytic activity		metabolic process	298	31.4128	4.62744
A5CQS7	CMM_1386	Ribosome-recycling factor OS=Clavibacter michiganensis subsp. michiganensis (strain NCPPB 382) GN=frr PE=3 SV=1 - [RRF_CLAM3]	III.3.4	68.11	1	13	13	139		cytoplasm	metabolic process; cell organization and biogenesis	185	20.5688	5.41455
A5CS71	CMM_1879	Putative oxidoreductase (Similar to E3 component of 2-oxoglutarate dehydrogenase complex) OS=Clavibacter michiganensis subsp. michiganensis (strain NCPPB 382) GN=CMM_1879 PE=3 SV=1 - [A5CS71_CLAM3]	V.1.3	41.22	1	12	12	41	catalytic activity; nucleotide binding	cytoplasm	cellular homeostasis; regulation of biological process; metabolic process	490	51.5932	4.98291
A5CS15	CMM_1823	Putative glycerol-3-phosphate dehydrogenase OS=Clavibacter michiganensis subsp. michiganensis (strain NCPPB 382) GN=glpD PE=4 SV=1 - [A5CS15_CLAM3]	I.1.6	31.4	1	12	12	42	catalytic activity		metabolic process	586	63.5486	5.74463
A5CV93	CMM_2945	Putative phenylalanine aminotransferase OS=Clavibacter michiganensis subsp. michiganensis (strain NCPPB 382) GN=hisC2 PE=3 SV=1 - [A5CV93_CLAM3]	I.2.6	40.16	1	12	12	46	catalytic activity		metabolic process	371	39.3887	5.87158
A5CS36	CMM_1844	Putative metallopeptidase OS=Clavibacter michiganensis subsp. michiganensis (strain NCPPB 382) GN=CMM_1844 PE=4 SV=1 - [A5CS36_CLAM3]	IV.7.1	50.11	1	12	13	60	catalytic activity		metabolic process	473	49.1929	4.75439
A5CLU8	CMM_0016	PknA protein OS=Clavibacter michiganensis subsp. michiganensis (strain NCPPB 382) GN=pknA PE=4 SV=1 - [A5CLU8_CLAM3]	IV.3.7	37.48	1	12	12	49	catalytic activity; protein binding; nucleotide binding; enzyme regulator activity		metabolic process	635	64.862	5.21143
A5CUU4	CMM_2797	Putative alpha-glucosidase, glycosyl hydrolase family 13 OS=Clavibacter michiganensis subsp. michiganensis (strain NCPPB 382) GN=aglC PE=4 SV=1 - [A5CUU4_CLAM3]	I.1.8	33.16	1	12	12	43	catalytic activity		metabolic process	579	63.9073	4.66553
A5CSZ6	CMM_2151	Putative transcriptional termination/antitermination factor OS=Clavibacter michiganensis subsp. michiganensis (strain NCPPB 382) GN=nusA PE=3 SV=1 - [A5CSZ6_CLAM3]	III.2.1	50.15	1	12	12	54	RNA binding	cytoplasm	metabolic process; regulation of biological process	335	36.2412	5.40186
A5CRD4	CMM_1592	Putative 2-hydroxyacid dehydrogenase OS=Clavibacter michiganensis subsp. michiganensis (strain NCPPB 382) GN=CMM_1592 PE=4 SV=1 - [A5CRD4_CLAM3]	I.1.5	57.14	1	12	12	49	catalytic activity; nucleotide binding		metabolic process	301	31.8714	4.76709
A5CPR8	CMM_1028	GalE1 protein OS=Clavibacter michiganensis subsp. michiganensis (strain NCPPB 382) GN=galE1 PE=3 SV=1 - [A5CPR8_CLAM3]	II.2.9	60.25	1	12	12	63	catalytic activity		metabolic process	322	34.3282	5.04639
A5CSR7	CMM_2075	Putative hydrolase OS=Clavibacter michiganensis subsp. michiganensis (strain NCPPB 382) GN=CMM_2075 PE=4 SV=1 - [A5CSR7_CLAM3]	V.1.6	53.77	1	12	12	58	catalytic activity		metabolic process	292	31.3048	4.77979
A5CUT7	CMM_2790	Putative aspartate aminotransferase OS=Clavibacter michiganensis subsp. michiganensis (strain NCPPB 382) GN=aspC PE=3 SV=1 - [A5CUT7_CLAM3]	I.2.1	34.96	1	12	12	61	catalytic activity		metabolic process	409	43.7516	4.97021
A5CQV0	CMM_1409	Aspartyl/glutamyl-tRNA(Asn/Gln) amidotransferase subunit B OS=Clavibacter michiganensis subsp. michiganensis (strain NCPPB 382) GN=gatB PE=3 SV=1 - [GATB_CLAM3]	III.3.2	30	1	12	12	55	nucleotide binding; catalytic activity		metabolic process	500	53.9168	4.99561
A5CQH3	CMM_1282	Putative CDP-glycerol:poly(Glycerophosphate) glycerophosphotransferase OS=Clavibacter michiganensis subsp. michiganensis (strain NCPPB 382) GN=CMM_1282 PE=4 SV=1 - [A5CQH3_CLAM3]	II.2.3	31.54	1	11	11	41	catalytic activity	membrane	metabolic process	428	48.1744	6.94678
A5CN53	CMM_0466	Uncharacterized protein OS=Clavibacter michiganensis subsp. michiganensis (strain NCPPB 382) GN=CMM_0466 PE=4 SV=1 - [A5CN53_CLAM3]	V.2.1	40.68	1	11	11	59				295	30.4928	4.39893
A5CRR0	CMM_1717	Putative molybdate ABC transporter ATP-binding subunit OS=Clavibacter michiganensis subsp. michiganensis (strain NCPPB 382) GN=modF PE=4 SV=1 - [A5CRR0_CLAM3]	IV.1.7	60.61	1	11	11	49	nucleotide binding; catalytic activity		metabolic process	264	28.6929	5.49072
A5CUX8	CMM_2831	Putative nucleoside-diphosphate-sugar epimerase OS=Clavibacter michiganensis subsp. michiganensis (strain NCPPB 382) GN=CMM_2831 PE=4 SV=1 - [A5CUX8_CLAM3]	I.1.12	54.7	1	11	11	48	catalytic activity		metabolic process	287	29.0892	4.7417
A5CPE3	CMM_0904	Probable malate:quinone oxidoreductase OS=Clavibacter michiganensis subsp. michiganensis (strain NCPPB 382) GN=mqo PE=3 SV=1 - [MQO_CLAM3]	I.1.3	28.05	1	11	11	36	catalytic activity		metabolic process	492	53.83	6.85889
A5CU17	CMM_2521	Bifunctional protein FolD OS=Clavibacter michiganensis subsp. michiganensis (strain NCPPB 382) GN=folD PE=3 SV=1 - [FOLD_CLAM3]	I.5.6	43.67	1	11	11	53	catalytic activity		metabolic process	300	31.3969	5.69385
A5CP03	CMM_0764	PpaF protein OS=Clavibacter michiganensis subsp. michiganensis (strain NCPPB 382) GN=ppaF PE=4 SV=1 - [A5CP03_CLAM3]	IV.6.1	74.62	1	11	11	192	catalytic activity		metabolic process	327	31.2999	8.5874
A5CUD0	CMM_2634	Uncharacterized protein OS=Clavibacter michiganensis subsp. michiganensis (strain NCPPB 382) GN=CMM_2634 PE=4 SV=1 - [A5CUD0_CLAM3]	V.2.1	39.85	1	10	10	31	catalytic activity		metabolic process	394	40.7442	4.60205
A5CUY9	CMM_2842	Putative sugar ABC transporter, substrate binding protein OS=Clavibacter michiganensis subsp. michiganensis (strain NCPPB 382) GN=CMM_2842 PE=4 SV=1 - [A5CUY9_CLAM3]	IV.1.5	40.16	1	10	10	39				366	36.9044	4.48779
A5CP49	CMM_0810	Dihydrodipicolinate synthase OS=Clavibacter michiganensis subsp. michiganensis (strain NCPPB 382) GN=dapX PE=3 SV=1 - [A5CP49_CLAM3]	I.2.5	40.33	1	10	10	41	catalytic activity		metabolic process	305	32.9949	4.89404
A5CNJ7	CMM_0609	Putative aldose-1-epimerase OS=Clavibacter michiganensis subsp. michiganensis (strain NCPPB 382) GN=CMM_0609 PE=4 SV=1 - [A5CNJ7_CLAM3]	I.1.1	53	1	10	10	51	catalytic activity		metabolic process	317	34.7235	4.95752
A5CQV2	CMM_1411	Putative secreted protein OS=Clavibacter michiganensis subsp. michiganensis (strain NCPPB 382) GN=CMM_1411 PE=4 SV=1 - [A5CQV2_CLAM3]	V.2.1	37.34	1	10	10	63				549	55.3711	4.52588
A5CMB5	CMM_0179	NAD-dependent aldehyde dehydrogenase OS=Clavibacter michiganensis subsp. michiganensis (strain NCPPB 382) GN=CMM_0179 PE=3 SV=1 - [A5CMB5_CLAM3]	V.1.3	30.5	1	10	10	55	catalytic activity		metabolic process	459	48.8377	4.70361
A5CPA0	CMM_0861	50S ribosomal protein L7/L12 OS=Clavibacter michiganensis subsp. michiganensis (strain NCPPB 382) GN=rplL PE=3 SV=1 - [RL7_CLAM3]	III.3.1	89.76	1	10	10	68	structural molecule activity	ribosome	metabolic process	127	13.099	4.67822
A5CTS8	CMM_2432	Putative aldo/keto reductase OS=Clavibacter michiganensis subsp. michiganensis (strain NCPPB 382) GN=CMM_2432 PE=4 SV=1 - [A5CTS8_CLAM3]	V.1.3	43.03	1	10	10	56				330	35.3118	4.86865
A5CTS5	CMM_2428	Ribonucleoside-diphosphate reductase subunit beta OS=Clavibacter michiganensis subsp. michiganensis (strain NCPPB 382) GN=nrdB PE=3 SV=1 - [A5CTS5_CLAM3]	I.3.1	36.86	1	10	10	58	catalytic activity; metal ion binding		metabolic process	331	38.312	4.75439
A5CQY4	CMM_1443	NH(3)-dependent NAD(+) synthetase OS=Clavibacter michiganensis subsp. michiganensis (strain NCPPB 382) GN=nadE PE=3 SV=1 - [A5CQY4_CLAM3]	I.5.4	54.21	1	10	10	83	nucleotide binding; catalytic activity		metabolic process	273	29.575	4.79248
A5CU64	CMM_2568	10 kDa chaperonin OS=Clavibacter michiganensis subsp. michiganensis (strain NCPPB 382) GN=groS PE=3 SV=1 - [CH10_CLAM3]	IV.4.1	88.78	1	10	10	187	nucleotide binding	cytoplasm	metabolic process	98	10.5275	4.67822
A5CLJ8	pCM1_0015	Putative secreted protein OS=Clavibacter michiganensis subsp. michiganensis (strain NCPPB 382) GN=pCM1_0015 PE=4 SV=1 - [A5CLJ8_CLAM3]	IV.2.5	54.22	1	9	9	54				367	37.7696	5.73193
A5CN98	CMM_0511	Uncharacterized protein OS=Clavibacter michiganensis subsp. michiganensis (strain NCPPB 382) GN=CMM_0511 PE=4 SV=1 - [A5CN98_CLAM3]	V.2.1	55.7	1	9	9	70	protein binding			298	31.4084	4.95752
A5CMX1	CMM_0385	Putative L-threonine aldolase OS=Clavibacter michiganensis subsp. michiganensis (strain NCPPB 382) GN=ltaE PE=4 SV=1 - [A5CMX1_CLAM3]	I.2.4	40.38	1	9	9	45	catalytic activity		metabolic process	369	39.4938	5.16064
A5CQ94	CMM_1203	Putative ATP-dependant serine protease protein containing a PDZ domain, family S16 OS=Clavibacter michiganensis subsp. michiganensis (strain NCPPB 382) GN=CMM_1203 PE=4 SV=1 - [A5CQ94_CLAM3]	IV.7.3	34.71	1	9	9	42	catalytic activity; protein binding; nucleotide binding		metabolic process	363	37.673	4.58936
A5CU75	CMM_2579	30S ribosomal protein S9 OS=Clavibacter michiganensis subsp. michiganensis (strain NCPPB 382) GN=rpsI PE=3 SV=1 - [RS9_CLAM3]	III.3.1	71.43	1	9	9	59	structural molecule activity	ribosome	metabolic process	161	17.3533	10.272
A5CT77	CMM_2232	Carbonic anhydrase OS=Clavibacter michiganensis subsp. michiganensis (strain NCPPB 382) GN=cynT PE=3 SV=1 - [A5CT77_CLAM3]	I.6.1	62.73	1	9	9	76	catalytic activity; metal ion binding		metabolic process	220	22.8779	5.05908
A5CQS6	CMM_1385	Uridylate kinase OS=Clavibacter michiganensis subsp. michiganensis (strain NCPPB 382) GN=pyrH PE=3 SV=1 - [PYRH_CLAM3]	I.3.2	63.45	1	9	9	64	nucleotide binding; catalytic activity	cytoplasm	metabolic process	238	25.2909	5.73193
A5CUN0	CMM_2733	Putative sugar ABC transporter, substrate binding protein OS=Clavibacter michiganensis subsp. michiganensis (strain NCPPB 382) GN=CMM_2733 PE=4 SV=1 - [A5CUN0_CLAM3]	IV.1.5	40.04	1	9	9	86	transporter activity		transport	452	47.1539	4.31006
A5CTA5	CMM_2260	Putative serine peptidase, family S8 OS=Clavibacter michiganensis subsp. michiganensis (strain NCPPB 382) GN=CMM_2260 PE=4 SV=1 - [A5CTA5_CLAM3]	IV.7.3	44.03	1	8	8	43	catalytic activity		metabolic process	427	42.7082	5.46533
A5CNI6	CMM_0598	Delta-aminolevulinic acid dehydratase OS=Clavibacter michiganensis subsp. michiganensis (strain NCPPB 382) GN=hemB PE=3 SV=1 - [A5CNI6_CLAM3]	I.5.7	45.09	1	8	8	60	catalytic activity; metal ion binding		metabolic process	326	35.2296	4.85596
A5CSM5	CMM_2033	Uncharacterized protein OS=Clavibacter michiganensis subsp. michiganensis (strain NCPPB 382) GN=CMM_2033 PE=4 SV=1 - [A5CSM5_CLAM3]	IV.1.1	51.61	1	8	8	147				341	33.8675	4.43701
A5CLK1	pCM1_0018	Putative secreted protein OS=Clavibacter michiganensis subsp. michiganensis (strain NCPPB 382) GN=pCM1_0018 PE=4 SV=1 - [A5CLK1_CLAM3]	IV.2.5	41.27	1	5	8	37				252	26.352	5.2749
A5CSN5	CMM_2043	Uncharacterized protein OS=Clavibacter michiganensis subsp. michiganensis (strain NCPPB 382) GN=CMM_2043 PE=4 SV=1 - [A5CSN5_CLAM3]	V.2.2	64.57	1	5	9	74				302	30.7614	5.57959
A5CS53	CMM_1861	UDP-N-acetylmuramoylalanine--D-glutamate ligase OS=Clavibacter michiganensis subsp. michiganensis (strain NCPPB 382) GN=murD PE=3 SV=1 - [A5CS53_CLAM3]	II.2.1	51.75	1	19	19	59	nucleotide binding; catalytic activity	cytoplasm	regulation of biological process; metabolic process; cell division; cell organization and biogenesis	514	54.6111	5.021
A5CLT8	CMM_0006	DNA gyrase subunit B OS=Clavibacter michiganensis subsp. michiganensis (strain NCPPB 382) GN=gyrB PE=3 SV=1 - [A5CLT8_CLAM3]	III.1.1	38.33	1	18	18	54	nucleotide binding; metal ion binding; DNA binding; catalytic activity	chromosome; cytoplasm	metabolic process	681	75.5214	5.46533
A5CRT9	CMM_1746	Putative sporulation transcription regulator WhiA OS=Clavibacter michiganensis subsp. michiganensis (strain NCPPB 382) GN=whiA PE=3 SV=1 - [WHIA_CLAM3]	IV.3.1	59.51	1	15	15	46	DNA binding		metabolic process; regulation of biological process	326	35.4347	9.15869
A5CRS1	CMM_1728	Putative ABC transporter, ATP-binding protein OS=Clavibacter michiganensis subsp. michiganensis (strain NCPPB 382) GN=CMM_1728 PE=4 SV=1 - [A5CRS1_CLAM3]	IV.1.1	66.41	1	15	15	78	nucleotide binding; catalytic activity		metabolic process; transport	256	27.8814	5.38916
A5CSN4	CMM_2042	Putative metallopeptidase, M16 family OS=Clavibacter michiganensis subsp. michiganensis (strain NCPPB 382) GN=pepR PE=3 SV=1 - [A5CSN4_CLAM3]	IV.7.1	52.99	1	14	14	47	catalytic activity; metal ion binding		metabolic process	451	48.0765	4.80518
A5CT05	CMM_2160	1-deoxy-D-xylulose 5-phosphate reductoisomerase OS=Clavibacter michiganensis subsp. michiganensis (strain NCPPB 382) GN=dxrA PE=3 SV=1 - [A5CT05_CLAM3]	I.1.5	62.5	1	14	14	47	protein binding; catalytic activity; metal ion binding; nucleotide binding		metabolic process	360	38.29	5.26221
A5CR97	CMM_1555	Elongation factor 4 OS=Clavibacter michiganensis subsp. michiganensis (strain NCPPB 382) GN=lepA PE=3 SV=1 - [LEPA_CLAM3]	III.3.5	36.59	1	14	14	51	nucleotide binding; RNA binding; catalytic activity	membrane	metabolic process; regulation of biological process	615	67.0067	5.37646
A5CMD7	CMM_0201	Putative glycosyl hydrolase, family 2 OS=Clavibacter michiganensis subsp. michiganensis (strain NCPPB 382) GN=CMM_0201 PE=4 SV=1 - [A5CMD7_CLAM3]	I.1.2	33.66	1	13	13	33	catalytic activity		metabolic process	618	69.2763	5.08447
A5CPX5	CMM_1085	Putative trehalose-phosphate synthase OS=Clavibacter michiganensis subsp. michiganensis (strain NCPPB 382) GN=otsA PE=4 SV=1 - [A5CPX5_CLAM3]	I.1.5	29.76	1	13	13	54	catalytic activity		metabolic process	531	58.604	5.57959
A5CP15	CMM_0776	Putative NAD-dependent aldehyde dehydrogenase OS=Clavibacter michiganensis subsp. michiganensis (strain NCPPB 382) GN=CMM_0776 PE=3 SV=1 - [A5CP15_CLAM3]	V.1.3	36.53	1	12	12	42	catalytic activity		metabolic process	501	53.3204	5.32568
A5CQU5	CMM_1404	DNA ligase OS=Clavibacter michiganensis subsp. michiganensis (strain NCPPB 382) GN=ligA PE=3 SV=1 - [DNLJ_CLAM3]	III.1.1	20.05	1	12	12	41	DNA binding; catalytic activity; metal ion binding		metabolic process; response to stimulus	853	90.2683	5.0083
A5CRI9	CMM_1646	RNA polymerase sigma factor SigA OS=Clavibacter michiganensis subsp. michiganensis (strain NCPPB 382) GN=sigA PE=3 SV=1 - [A5CRI9_CLAM3]	IV.3.4	30.49	1	12	13	43	DNA binding	cytoplasm	metabolic process; regulation of biological process	492	52.314	5.43994
A5CUA8	CMM_2612	50S ribosomal protein L22 OS=Clavibacter michiganensis subsp. michiganensis (strain NCPPB 382) GN=rplV PE=3 SV=1 - [RL22_CLAM3]	III.3.1	72.31	1	12	12	56	RNA binding; structural molecule activity	ribosome	metabolic process	130	14.3138	10.3159
A5CUB3	CMM_2617	50S ribosomal protein L3 OS=Clavibacter michiganensis subsp. michiganensis (strain NCPPB 382) GN=rplC PE=3 SV=1 - [RL3_CLAM3]	III.3.1	66.82	1	12	12	75	RNA binding; structural molecule activity	ribosome	metabolic process	217	23.1703	10.5063
A5CQ36	CMM_1145	Putative deacetylase OS=Clavibacter michiganensis subsp. michiganensis (strain NCPPB 382) GN=CMM_1145 PE=4 SV=1 - [A5CQ36_CLAM3]	II.2.4	57.77	1	11	11	25	catalytic activity		metabolic process	296	34.0107	5.17334
A5CT46	CMM_2201	Cysteine desulfurase OS=Clavibacter michiganensis subsp. michiganensis (strain NCPPB 382) GN=CMM_2201 PE=4 SV=1 - [A5CT46_CLAM3]	I.5.11	47.34	1	11	11	40	catalytic activity		metabolic process	433	46.0481	6.0874
A5CNI4	CMM_0596	Porphobilinogen deaminase OS=Clavibacter michiganensis subsp. michiganensis (strain NCPPB 382) GN=hemC PE=3 SV=1 - [A5CNI4_CLAM3]	I.5.7	60.06	1	11	11	45	catalytic activity		metabolic process	328	33.6216	5.16064
A5CP32	CMM_0793	Putative myo-inositol dehydrogenase OS=Clavibacter michiganensis subsp. michiganensis (strain NCPPB 382) GN=CMM_0793 PE=4 SV=1 - [A5CP32_CLAM3]	I.1.11	52.24	1	11	11	39	catalytic activity		metabolic process	335	35.051	5.13525
A5CVB2	CMM_2963	30S ribosomal protein S6 OS=Clavibacter michiganensis subsp. michiganensis (strain NCPPB 382) GN=rpsF PE=3 SV=1 - [A5CVB2_CLAM3]	III.3.1	78.57	1	11	11	86	RNA binding; structural molecule activity	ribosome	metabolic process	154	16.4294	5.66846
A5CRW3	CMM_1770	ATP phosphoribosyltransferase OS=Clavibacter michiganensis subsp. michiganensis (strain NCPPB 382) GN=hisG PE=3 SV=1 - [A5CRW3_CLAM3]	I.2.6	46.24	1	11	11	42	nucleotide binding; metal ion binding; catalytic activity	cytoplasm	metabolic process	279	29.6347	5.09717
A5CUK6	CMM_2709	Putative metallopeptidase, family M23 OS=Clavibacter michiganensis subsp. michiganensis (strain NCPPB 382) GN=CMM_2709 PE=4 SV=1 - [A5CUK6_CLAM3]	IV.6.3	48.85	1	10	10	60				391	39.5721	4.90674
A5CS40	CMM_1848	Histidinol dehydrogenase OS=Clavibacter michiganensis subsp. michiganensis (strain NCPPB 382) GN=hisD PE=3 SV=1 - [A5CS40_CLAM3]	I.2.6	43.32	1	10	10	37	catalytic activity; metal ion binding; nucleotide binding		metabolic process	434	44.4603	5.09717
A5CSQ9	CMM_2067	D-alanyl-D-alanine carboxypeptidase OS=Clavibacter michiganensis subsp. michiganensis (strain NCPPB 382) GN=dacB PE=4 SV=1 - [A5CSQ9_CLAM3]	II.2.1	27.77	1	10	10	34	catalytic activity		metabolic process	479	48.1127	5.0083
A5CUV4	CMM_2807	Putative polyprenyl diphosphate synthase OS=Clavibacter michiganensis subsp. michiganensis (strain NCPPB 382) GN=menX PE=4 SV=1 - [A5CUV4_CLAM3]	I.5.8	30.25	1	10	10	30	catalytic activity		metabolic process	357	38.3229	4.91943
A5CS21	CMM_1829	Putative dihydroxyacetone kinase OS=Clavibacter michiganensis subsp. michiganensis (strain NCPPB 382) GN=CMM_1829 PE=4 SV=1 - [A5CS21_CLAM3]	I.1.1	37.84	1	10	10	40	catalytic activity		metabolic process	333	34.551	4.71631
A5CRN7	CMM_1694	L-cysteine:1D-myo-inositol 2-amino-2-deoxy-alpha-D-glucopyranoside ligase OS=Clavibacter michiganensis subsp. michiganensis (strain NCPPB 382) GN=mshC PE=3 SV=1 - [MSHC_CLAM3]	III.3.2	30.52	1	10	10	37	nucleotide binding; catalytic activity; metal ion binding	cytoplasm	metabolic process	426	45.3408	4.75439
A5CTW3	CMM_2468	Putative iron-dependent repressor OS=Clavibacter michiganensis subsp. michiganensis (strain NCPPB 382) GN=dtxR PE=4 SV=1 - [A5CTW3_CLAM3]	IV.3.1	51.29	1	10	10	42	DNA binding; metal ion binding; protein binding		regulation of biological process	232	25.3941	5.03369
A5CNG4	CMM_0576	Naphthoate synthase OS=Clavibacter michiganensis subsp. michiganensis (strain NCPPB 382) GN=menB PE=4 SV=1 - [A5CNG4_CLAM3]	I.5.8	49.5	1	10	10	47	catalytic activity		metabolic process	303	33.3987	6.13818
A5CP98	CMM_0859	Putative oxidoreductase OS=Clavibacter michiganensis subsp. michiganensis (strain NCPPB 382) GN=CMM_0859 PE=4 SV=1 - [A5CP98_CLAM3]	V.1.3	37.23	1	10	10	36	catalytic activity		metabolic process	325	35.8471	5.37646
A5CUA7	CMM_2611	30S ribosomal protein S3 OS=Clavibacter michiganensis subsp. michiganensis (strain NCPPB 382) GN=rpsC PE=3 SV=1 - [RS3_CLAM3]	III.3.1	40.75	1	10	10	42	RNA binding; structural molecule activity	ribosome	metabolic process	265	29.5356	10.5796
A5CS59	CMM_1867	Ribosomal RNA small subunit methyltransferase H OS=Clavibacter michiganensis subsp. michiganensis (strain NCPPB 382) GN=rsmH PE=3 SV=1 - [RSMH_CLAM3]	II.1.1	44.97	1	10	10	39	catalytic activity	cytoplasm	metabolic process	318	34.7304	5.89697
A5CUR8	CMM_2770	Uncharacterized protein OS=Clavibacter michiganensis subsp. michiganensis (strain NCPPB 382) GN=CMM_2770 PE=4 SV=1 - [A5CUR8_CLAM3]	I.1.11	29.41	1	10	10	44				357	39.2955	5.36377
A5CSK6	CMM_2014	1-(5-phosphoribosyl)-5-[(5-phosphoribosylamino)methylideneamino] imidazole-4-carboxamide isomerase OS=Clavibacter michiganensis subsp. michiganensis (strain NCPPB 382) GN=hisA PE=3 SV=1 - [A5CSK6_CLAM3]	I.2.6	56.63	1	10	10	55	catalytic activity; nucleotide binding	cytoplasm	metabolic process	249	26.1374	4.56396
A5CUB8	CMM_2622	30S ribosomal protein S7 OS=Clavibacter michiganensis subsp. michiganensis (strain NCPPB 382) GN=rpsG PE=3 SV=1 - [RS7_CLAM3]	III.3.1	69.23	1	10	10	59	RNA binding; structural molecule activity	ribosome	metabolic process	156	17.2144	10.2427
A5CQ78	CMM_1187	Putative Mg2+ transporter, MgtE family OS=Clavibacter michiganensis subsp. michiganensis (strain NCPPB 382) GN=CMM_1187 PE=4 SV=1 - [A5CQ78_CLAM3]	IV.1.16	25.67	1	9	9	17	catalytic activity; protein binding; nucleotide binding		metabolic process	448	48.8241	4.86865
A5CRQ1	CMM_1708	Probable D-alanyl-D-alanine carboxypeptidase OS=Clavibacter michiganensis subsp. michiganensis (strain NCPPB 382) GN=pbpX PE=3 SV=1 - [A5CRQ1_CLAM3]	II.2.1	27.23	1	9	9	30	catalytic activity		metabolic process	404	40.8831	4.58936
A5CS29	CMM_1837	Putative menaquinol-cytochrome c reductase cytochrome B subunit OS=Clavibacter michiganensis subsp. michiganensis (strain NCPPB 382) GN=qcrB PE=4 SV=1 - [A5CS29_CLAM3]	I.1.4	18.42	1	9	9	37	catalytic activity	membrane	metabolic process	543	59.9466	7.59131
A5CRC6	CMM_1584	Putative tRNA-dihydrouridine synthase OS=Clavibacter michiganensis subsp. michiganensis (strain NCPPB 382) GN=dusA PE=4 SV=1 - [A5CRC6_CLAM3]	III.3.4	29.51	1	9	9	27	catalytic activity; nucleotide binding		metabolic process	410	43.4271	5.8335
A5CR34	CMM_1493	Gamma-glutamyl phosphate reductase OS=Clavibacter michiganensis subsp. michiganensis (strain NCPPB 382) GN=proA PE=3 SV=1 - [PROA_CLAM3]	I.2.3	25.23	1	9	9	26	catalytic activity; nucleotide binding	cytoplasm	metabolic process	432	44.7727	5.73193
A5CPW3	CMM_1073	Putative glycosyl hydrolase, family 15 OS=Clavibacter michiganensis subsp. michiganensis (strain NCPPB 382) GN=CMM_1073 PE=4 SV=1 - [A5CPW3_CLAM3]	I.1.8	24.44	1	9	9	31	catalytic activity		metabolic process	622	68.1256	4.94482
A5CN09	CMM_0423	Putative sugar ABC transporter, binding protein OS=Clavibacter michiganensis subsp. michiganensis (strain NCPPB 382) GN=CMM_0423 PE=4 SV=1 - [A5CN09_CLAM3]	IV.1.5	29.64	1	9	9	35				334	34.6931	4.32275
A5CN72	CMM_0485	3',5'-cyclic adenosine monophosphate phosphodiesterase CpdA OS=Clavibacter michiganensis subsp. michiganensis (strain NCPPB 382) GN=cpdA PE=3 SV=1 - [A5CN72_CLAM3]	IV.3.8	49.5	1	9	9	40	nucleotide binding; catalytic activity; metal ion binding		metabolic process	301	31.3805	5.46533
A5CP76	CMM_0837	Putative glycosyl hydrolase, family 15 OS=Clavibacter michiganensis subsp. michiganensis (strain NCPPB 382) GN=wcoR PE=4 SV=1 - [A5CP76_CLAM3]	II.2.8	20.79	1	9	9	38	catalytic activity		metabolic process	611	66.5202	5.12256
A5CUN2	CMM_2735	Fructose-1,6-bisphosphatase OS=Clavibacter michiganensis subsp. michiganensis (strain NCPPB 382) GN=glpX PE=3 SV=1 - [A5CUN2_CLAM3]	I.1.1	39.94	1	9	9	46	catalytic activity; metal ion binding		metabolic process	328	34.3054	5.13525
A5CR74	CMM_1532	Putative proline/glycine/betaine/choline ABC transporter, substrate-binding protein OS=Clavibacter michiganensis subsp. michiganensis (strain NCPPB 382) GN=proX PE=4 SV=1 - [A5CR74_CLAM3]	IV.1.6	32.69	1	9	9	83	transporter activity		transport	309	32.2541	4.32275
A5CQ57	CMM_1166	ATP synthase subunit delta OS=Clavibacter michiganensis subsp. michiganensis (strain NCPPB 382) GN=atpH PE=3 SV=1 - [ATPD_CLAM3]	IV.1.18	59.32	1	9	9	44	catalytic activity; transporter activity	membrane	metabolic process; transport	263	27.8008	5.51611
A5CRP6	CMM_1703	Putative glycine/betaine ABC transporter,substrate-binding protein OS=Clavibacter michiganensis subsp. michiganensis (strain NCPPB 382) GN=CMM_1703 PE=4 SV=1 - [A5CRP6_CLAM3]	IV.1.6	32.54	1	8	8	41	transporter activity		transport	335	35.7598	4.4751
A5CS28	CMM_1836	Putative menaquinol-cytochrome C reductase iron-sulfur subunit OS=Clavibacter michiganensis subsp. michiganensis (strain NCPPB 382) GN=qcrA PE=4 SV=1 - [A5CS28_CLAM3]	I.1.4	27.37	1	8	8	25	catalytic activity; metal ion binding		metabolic process	369	40.1533	5.43994
A5CPX0	CMM_1080	Conserved membrane protein OS=Clavibacter michiganensis subsp. michiganensis (strain NCPPB 382) GN=CMM_1080 PE=4 SV=1 - [A5CPX0_CLAM3]	IV.1.9	23.77	1	8	8	31				631	62.6231	5.24951
A5CSY2	CMM_2137	Putative sugarkinase OS=Clavibacter michiganensis subsp. michiganensis (strain NCPPB 382) GN=CMM_2137 PE=4 SV=1 - [A5CSY2_CLAM3]	I.1.13	26.28	1	8	8	36	catalytic activity		metabolic process	312	31.8323	5.17334
A5CTC8	CMM_2283	Putative metal ABC transporter, substrate-binding protein OS=Clavibacter michiganensis subsp. michiganensis (strain NCPPB 382) GN=CMM_2283 PE=4 SV=1 - [A5CTC8_CLAM3]	IV.1.7	33.23	1	8	8	48				310	32.1588	4.48779
A5CRT8	CMM_1745	Superoxide dismutase OS=Clavibacter michiganensis subsp. michiganensis (strain NCPPB 382) GN=sodA PE=3 SV=1 - [A5CRT8_CLAM3]	IV.5.1	59.13	1	8	8	76	antioxidant activity; catalytic activity; metal ion binding		metabolic process; response to stimulus	208	23.2356	5.35107
A5CUB2	CMM_2616	50S ribosomal protein L4 OS=Clavibacter michiganensis subsp. michiganensis (strain NCPPB 382) GN=rplD PE=3 SV=1 - [A5CUB2_CLAM3]	III.3.1	38.53	1	8	8	75	RNA binding; structural molecule activity	ribosome	metabolic process	218	23.0443	9.59814
A5CNK4	CMM_0616	Uncharacterized protein OS=Clavibacter michiganensis subsp. michiganensis (strain NCPPB 382) GN=CMM_0616 PE=4 SV=1 - [A5CNK4_CLAM3]	V.2.1	35.04	1	8	8	57				254	25.5479	4.70361
A5CV02	CMM_2857	Uncharacterized protein OS=Clavibacter michiganensis subsp. michiganensis (strain NCPPB 382) GN=CMM_2857 PE=4 SV=1 - [A5CV02_CLAM3]	V.2.2	55.48	1	7	7	14				146	15.4616	4.52588
A5CUC1	CMM_2625	Hypothetical membrane protein OS=Clavibacter michiganensis subsp. michiganensis (strain NCPPB 382) GN=CMM_2625 PE=4 SV=1 - [A5CUC1_CLAM3]	V.2.2	29.7	1	7	7	34				330	36.8359	5.33838
A5CQY5	CMM_1444	Uncharacterized protein OS=Clavibacter michiganensis subsp. michiganensis (strain NCPPB 382) GN=CMM_1444 PE=4 SV=1 - [A5CQY5_CLAM3]	V.2.2	47.66	1	7	7	35				235	25.515	5.73193
A5CQQ6	CMM_1365	Putative membrane-associated serine protease,subfamily S1C OS=Clavibacter michiganensis subsp. michiganensis (strain NCPPB 382) GN=CMM_1365 PE=4 SV=1 - [A5CQQ6_CLAM3]	IV.7.3	32.33	1	7	7	33	catalytic activity	membrane	metabolic process	399	40.3364	5.04639
A5CTS6	CMM_2431	Uncharacterized protein OS=Clavibacter michiganensis subsp. michiganensis (strain NCPPB 382) GN=CMM_2431 PE=4 SV=1 - [A5CTS6_CLAM3]	V.2.2	21.66	1	7	7	43				157	15.3775	4.41162
A5CR21	CMM_1480	Putative expansin OS=Clavibacter michiganensis subsp. michiganensis (strain NCPPB 382) GN=expA PE=4 SV=1 - [A5CR21_CLAM3]	IV.6.3	48.62	1	7	7	94				253	26.4936	9.18799
A5CPK9	CMM_0969	Succinate dehydrogenase iron-sulfur subunit OS=Clavibacter michiganensis subsp. michiganensis (strain NCPPB 382) GN=sdhB PE=3 SV=1 - [A5CPK9_CLAM3]	I.1.3	71.15	1	16	16	39	catalytic activity; metal ion binding		metabolic process	253	28.3802	6.03662
A5CS50	CMM_1858	UDP-N-acetylmuramate--L-alanine ligase OS=Clavibacter michiganensis subsp. michiganensis (strain NCPPB 382) GN=murC PE=3 SV=1 - [MURC_CLAM3]	II.2.1	42.23	1	16	16	57	nucleotide binding; catalytic activity	cytoplasm	regulation of biological process; metabolic process; cell division; cell organization and biogenesis	476	50.1763	5.0083
A5CSW6	CMM_2121	Putative glutathione S-transferase OS=Clavibacter michiganensis subsp. michiganensis (strain NCPPB 382) GN=CMM_2121 PE=4 SV=1 - [A5CSW6_CLAM3]	IV.5.8	48.95	1	15	15	52	protein binding; catalytic activity		metabolic process	382	42.576	5.08447
A5CSV7	CMM_2112	Uncharacterized protein OS=Clavibacter michiganensis subsp. michiganensis (strain NCPPB 382) GN=CMM_2112 PE=4 SV=1 - [A5CSV7_CLAM3]	V.2.1	52.97	1	15	15	58	catalytic activity		metabolic process	489	53.182	5.51611
A5CSD0	CMM_1938	Putative peptidase, family M20D OS=Clavibacter michiganensis subsp. michiganensis (strain NCPPB 382) GN=CMM_1938 PE=4 SV=1 - [A5CSD0_CLAM3]	IV.7.1	55.72	1	14	14	63	catalytic activity		metabolic process	411	42.8638	4.84326
A5CUA2	CMM_2605	50S ribosomal protein L5 OS=Clavibacter michiganensis subsp. michiganensis (strain NCPPB 382) GN=rplE PE=3 SV=1 - [A5CUA2_CLAM3]	III.3.1	73.23	1	14	14	99	RNA binding; structural molecule activity	ribosome	metabolic process	198	21.8444	9.26123
A5CRX6	CMM_1783	Carbamoyl-phosphate synthase small chain OS=Clavibacter michiganensis subsp. michiganensis (strain NCPPB 382) GN=carA PE=3 SV=1 - [A5CRX6_CLAM3]	I.3.2	56.89	1	13	13	88	nucleotide binding; catalytic activity		metabolic process	392	41.9852	5.2749
A5CSC2	CMM_1930	Uncharacterized protein OS=Clavibacter michiganensis subsp. michiganensis (strain NCPPB 382) GN=CMM_1930 PE=4 SV=1 - [A5CSC2_CLAM3]	V.2.1	36.28	1	12	12	35	catalytic activity		metabolic process	521	54.8058	5.31299
A5CQ59	CMM_1168	ATP synthase gamma chain OS=Clavibacter michiganensis subsp. michiganensis (strain NCPPB 382) GN=atpG PE=3 SV=1 - [ATPG_CLAM3]	IV.1.18	46.82	1	12	12	49	nucleotide binding; catalytic activity; transporter activity	membrane	metabolic process; transport	299	32.6802	8.92432
A5CNZ2	CMM_0753	Phosphoribosylaminoimidazole-succinocarboxamide synthase OS=Clavibacter michiganensis subsp. michiganensis (strain NCPPB 382) GN=purC PE=3 SV=1 - [A5CNZ2_CLAM3]	I.3.1	46.73	1	12	12	39	nucleotide binding; catalytic activity		metabolic process	306	34.1271	4.84326
A5CUV3	CMM_2806	Putative ferredoxin/ferredoxin-NADP reductase OS=Clavibacter michiganensis subsp. michiganensis (strain NCPPB 382) GN=CMM_2806 PE=4 SV=1 - [A5CUV3_CLAM3]	I.5.8	34.87	1	12	12	46	catalytic activity		metabolic process	456	50.4349	5.18604
A5CNJ2	CMM_0604	PfkA protein OS=Clavibacter michiganensis subsp. michiganensis (strain NCPPB 382) GN=pfkA PE=3 SV=1 - [A5CNJ2_CLAM3]	I.1.1	42.82	1	12	12	46	nucleotide binding; catalytic activity; metal ion binding	cytoplasm	metabolic process	341	36.3077	6.39209
A5CR68	CMM_1526	Putative oxidoreductase OS=Clavibacter michiganensis subsp. michiganensis (strain NCPPB 382) GN=CMM_1526 PE=4 SV=1 - [A5CR68_CLAM3]	V.1.3	55.02	1	12	12	65	catalytic activity		metabolic process	289	31.1722	4.86865
A5CMU9	CMM_0363	Putative Fe3+-hydroxamate ABC transporter,substrate binding protein OS=Clavibacter michiganensis subsp. michiganensis (strain NCPPB 382) GN=CMM_0363 PE=4 SV=1 - [A5CMU9_CLAM3]	IV.1.7	41.31	1	11	11	31				351	37.5377	4.60205
A5CMD2	CMM_0196	Putative sugar ABC transporter, binding protein OS=Clavibacter michiganensis subsp. michiganensis (strain NCPPB 382) GN=CMM_0196 PE=4 SV=1 - [A5CMD2_CLAM3]	IV.1.5	31.14	1	11	11	35	transporter activity; catalytic activity		transport; metabolic process	440	46.4656	4.89404
A5CV91	CMM_2943	Putative 2-keto acid dehydrogenase,dehydrogenase E1 beta component OS=Clavibacter michiganensis subsp. michiganensis (strain NCPPB 382) GN=CMM_2943 PE=4 SV=1 - [A5CV91_CLAM3]	I.1.3	47.01	1	11	11	44	catalytic activity		metabolic process	351	37.8342	5.14795
A5CQU0	CMM_1399	Alpha-1,4 glucan phosphorylase OS=Clavibacter michiganensis subsp. michiganensis (strain NCPPB 382) GN=glgP PE=3 SV=1 - [A5CQU0_CLAM3]	I.1.8	19.86	1	11	11	38	catalytic activity		metabolic process	851	93.0788	5.47803
A5CPD5	CMM_0896	Acetate kinase OS=Clavibacter michiganensis subsp. michiganensis (strain NCPPB 382) GN=ackA PE=3 SV=1 - [ACKA_CLAM3]	I.1.7	41.67	1	11	11	59	nucleotide binding; metal ion binding; catalytic activity	cytoplasm	metabolic process	396	41.9204	5.13525
A5CQ68	CMM_1177	2,3,4,5-tetrahydropyridine-2,6-dicarboxylate N-succinyltransferase OS=Clavibacter michiganensis subsp. michiganensis (strain NCPPB 382) GN=dapD PE=3 SV=1 - [A5CQ68_CLAM3]	I.2.5	35.24	1	10	10	26	metal ion binding; catalytic activity	cytoplasm	metabolic process	332	34.1878	5.79541
A5CNV3	CMM_0714	Uncharacterized protein OS=Clavibacter michiganensis subsp. michiganensis (strain NCPPB 382) GN=CMM_0714 PE=4 SV=1 - [A5CNV3_CLAM3]	II.2.7	28.53	1	10	10	31				624	66.6138	4.64014
A5CNZ7	CMM_0758	Phosphoribosylformylglycinamidine cyclo-ligase OS=Clavibacter michiganensis subsp. michiganensis (strain NCPPB 382) GN=purM PE=3 SV=1 - [A5CNZ7_CLAM3]	I.3.1	49.05	1	10	10	33	nucleotide binding; catalytic activity	cytoplasm	metabolic process	369	37.1871	4.85596
A5CU19	CMM_2523	Putative glycosidase OS=Clavibacter michiganensis subsp. michiganensis (strain NCPPB 382) GN=CMM_2523 PE=4 SV=1 - [A5CU19_CLAM3]	I.1.8	23.72	1	10	10	34	catalytic activity		metabolic process	548	57.2614	4.97021
A5CMI3	CMM_0247	Putative oxidoreductase/dehydrogenase OS=Clavibacter michiganensis subsp. michiganensis (strain NCPPB 382) GN=CMM_0247 PE=4 SV=1 - [A5CMI3_CLAM3]	V.1.3	29.46	1	10	10	37	catalytic activity		metabolic process	404	43.2658	5.2876
A5CSI7	CMM_2000	Arginine biosynthesis bifunctional protein ArgJ OS=Clavibacter michiganensis subsp. michiganensis (strain NCPPB 382) GN=argJ PE=3 SV=1 - [A5CSI7_CLAM3]	I.2.3	32.81	1	10	10	39	catalytic activity	cytoplasm	metabolic process	384	39.0974	4.77979
A5CNR0	CMM_0671	Conserved membrane protein OS=Clavibacter michiganensis subsp. michiganensis (strain NCPPB 382) GN=CMM_0671 PE=4 SV=1 - [A5CNR0_CLAM3]	V.2.1	33.95	1	10	10	49		membrane		701	70.0777	5.16064
A5CNW6	CMM_0727	Putative hydrolase OS=Clavibacter michiganensis subsp. michiganensis (strain NCPPB 382) GN=CMM_0727 PE=4 SV=1 - [A5CNW6_CLAM3]	V.1.6	67.79	1	10	10	82	catalytic activity		metabolic process	267	28.4123	5.08447
A5CRW0	CMM_1767	Anthranilate synthase component I OS=Clavibacter michiganensis subsp. michiganensis (strain NCPPB 382) GN=trpE1 PE=4 SV=1 - [A5CRW0_CLAM3]	I.2.7	39.69	1	10	10	57	catalytic activity		metabolic process	519	55.9525	5.13525
A5CR61	CMM_1519	Glucose-6-phosphate 1-dehydrogenase OS=Clavibacter michiganensis subsp. michiganensis (strain NCPPB 382) GN=zwfA1 PE=3 SV=1 - [A5CR61_CLAM3]	I.1.2	29.45	1	9	9	30	catalytic activity; nucleotide binding		metabolic process	455	49.5998	5.73193
A5CQT3	CMM_1392	Uncharacterized protein OS=Clavibacter michiganensis subsp. michiganensis (strain NCPPB 382) GN=CMM_1392 PE=4 SV=1 - [A5CQT3_CLAM3]	V.2.1	51.64	1	9	9	32				244	26.1398	5.61768
A5CN15	CMM_0429	Uncharacterized protein OS=Clavibacter michiganensis subsp. michiganensis (strain NCPPB 382) GN=CMM_0429 PE=4 SV=1 - [A5CN15_CLAM3]	V.2.1	47.39	1	9	9	35				249	25.9335	9.30518
A5CNC6	CMM_0538	Uracil phosphoribosyltransferase OS=Clavibacter michiganensis subsp. michiganensis (strain NCPPB 382) GN=upp PE=3 SV=1 - [UPP_CLAM3]	I.3.2	63.68	1	9	9	42	nucleotide binding; metal ion binding; catalytic activity		metabolic process	212	22.7709	4.84326
A5CRC2	CMM_1580	Putative oxidoreductase OS=Clavibacter michiganensis subsp. michiganensis (strain NCPPB 382) GN=CMM_1580 PE=4 SV=1 - [A5CRC2_CLAM3]	V.1.3	32.52	1	9	9	36	catalytic activity		metabolic process	369	39.3308	4.91943
A5CUU3	CMM_2796	Putative oxidoreductase OS=Clavibacter michiganensis subsp. michiganensis (strain NCPPB 382) GN=CMM_2796 PE=4 SV=1 - [A5CUU3_CLAM3]	V.1.3	33.65	1	9	9	34	catalytic activity		metabolic process	312	33.1749	4.76709
A5CV92	CMM_2944	Putative 2-keto acid dehydrogenase,dehydrogenase E1 beta component OS=Clavibacter michiganensis subsp. michiganensis (strain NCPPB 382) GN=CMM_2944 PE=4 SV=1 - [A5CV92_CLAM3]	I.1.3	38.38	1	9	9	48	catalytic activity		metabolic process	370	40.6711	5.021
A5CU95	CMM_2599	50S ribosomal protein L15 OS=Clavibacter michiganensis subsp. michiganensis (strain NCPPB 382) GN=rplO PE=3 SV=1 - [A5CU95_CLAM3]	III.3.1	53.13	1	9	9	45	RNA binding; structural molecule activity	ribosome	metabolic process	192	19.9719	10.2427
A5CT40	CMM_2197	Aminomethyltransferase OS=Clavibacter michiganensis subsp. michiganensis (strain NCPPB 382) GN=gcvT PE=3 SV=1 - [A5CT40_CLAM3]	I.2.4	31.53	1	9	9	40	catalytic activity; protein binding	cytoplasm	metabolic process	406	41.8815	4.7417
A5CQD4	CMM_1243	Putative sugar ABC transporter, substrate-binding protein OS=Clavibacter michiganensis subsp. michiganensis (strain NCPPB 382) GN=CMM_1243 PE=4 SV=1 - [A5CQD4_CLAM3]	IV.1.5	32.89	1	9	9	39				380	39.7107	4.4751
A5CS76	CMM_1884	Putative transcriptional regulator with FHA domain OS=Clavibacter michiganensis subsp. michiganensis (strain NCPPB 382) GN=CMM_1884 PE=4 SV=1 - [A5CS76_CLAM3]	IV.3.1	60	1	9	9	68	protein binding			160	17.1646	4.99561
A5CTL8	CMM_2372	Putative dihydrolipoamide dehydrogenase (E3) component OS=Clavibacter michiganensis subsp. michiganensis (strain NCPPB 382) GN=CMM_2372 PE=3 SV=1 - [A5CTL8_CLAM3]	I.1.3	28.08	1	8	8	22	catalytic activity; nucleotide binding	cytoplasm	metabolic process; cellular homeostasis; regulation of biological process	495	51.4696	5.05908
A5CP16	CMM_0777	Uncharacterized protein OS=Clavibacter michiganensis subsp. michiganensis (strain NCPPB 382) GN=CMM_0777 PE=4 SV=1 - [A5CP16_CLAM3]	I.1.11	49.35	1	8	8	37	catalytic activity		metabolic process	308	32.7622	4.93213
A5CMG3	CMM_0227	Putative acetyl xylan esterase OS=Clavibacter michiganensis subsp. michiganensis (strain NCPPB 382) GN=CMM_0227 PE=4 SV=1 - [A5CMG3_CLAM3]	IV.5.6	45.77	1	8	8	30	catalytic activity		metabolic process	319	34.2048	5.04639
A5CV47	CMM_2900	Deoxycytidine triphosphate deaminase OS=Clavibacter michiganensis subsp. michiganensis (strain NCPPB 382) GN=dcd PE=3 SV=1 - [DCD_CLAM3]	I.3.3	59.7	1	8	8	28	catalytic activity		metabolic process	201	22.0722	5.57959
A5CU97	CMM_2601	30S ribosomal protein S5 OS=Clavibacter michiganensis subsp. michiganensis (strain NCPPB 382) GN=rpsE PE=3 SV=1 - [A5CU97_CLAM3]	III.3.1	55.2	1	8	8	34	RNA binding; structural molecule activity	ribosome	metabolic process	221	23.0424	10.3306
A5CPM1	CMM_0981	DeoA protein OS=Clavibacter michiganensis subsp. michiganensis (strain NCPPB 382) GN=deoA PE=4 SV=1 - [A5CPM1_CLAM3]	I.3.1	22.92	1	8	8	32	catalytic activity		metabolic process	432	45.6174	5.07178
A5CP80	CMM_0841	Inorganic pyrophosphatase OS=Clavibacter michiganensis subsp. michiganensis (strain NCPPB 382) GN=ipyA PE=3 SV=1 - [A5CP80_CLAM3]	I.6.1	47.43	1	8	8	38	metal ion binding; catalytic activity	cytoplasm	metabolic process	175	19.5135	4.57666
A5CQR4	CMM_1373	50S ribosomal protein L19 OS=Clavibacter michiganensis subsp. michiganensis (strain NCPPB 382) GN=rplS PE=3 SV=1 - [RL19_CLAM3]	III.3.1	53.51	1	8	8	53	structural molecule activity	ribosome	metabolic process	114	12.862	10.1548
A5CU98	CMM_2602	50S ribosomal protein L18 OS=Clavibacter michiganensis subsp. michiganensis (strain NCPPB 382) GN=rplR PE=3 SV=1 - [A5CU98_CLAM3]	III.3.1	46.34	1	8	8	46	RNA binding; structural molecule activity	ribosome	metabolic process	123	13.1621	11.2095
A5CRV0	CMM_1757	Putative response regulator involved in antitermination OS=Clavibacter michiganensis subsp. michiganensis (strain NCPPB 382) GN=CMM_1757 PE=4 SV=1 - [A5CRV0_CLAM3]	IV.3.2	48.02	1	8	8	36	signal transducer activity; RNA binding		regulation of biological process; response to stimulus	202	22.2057	4.84326
A5CN62	CMM_0475	Putative exonuclease III OS=Clavibacter michiganensis subsp. michiganensis (strain NCPPB 382) GN=xthB PE=4 SV=1 - [A5CN62_CLAM3]	III.1.6	28.78	1	8	8	29	catalytic activity		metabolic process; response to stimulus	278	31.1925	4.75439
A5CU23	CMM_2527	Putative oxidoreductase OS=Clavibacter michiganensis subsp. michiganensis (strain NCPPB 382) GN=CMM_2527 PE=4 SV=1 - [A5CU23_CLAM3]	V.1.3	34.99	1	8	8	53				343	36.9947	4.89404
A5CN21	CMM_0435	Putative iron-siderophore ABC transporter,binding protein OS=Clavibacter michiganensis subsp. michiganensis (strain NCPPB 382) GN=fepB PE=4 SV=1 - [A5CN21_CLAM3]	IV.1.7	42.18	1	8	8	59				358	36.3314	4.64014
A5CS68	CMM_1876	Putative glucokinase, putative catabolite repressor OS=Clavibacter michiganensis subsp. michiganensis (strain NCPPB 382) GN=glkA PE=4 SV=1 - [A5CS68_CLAM3]	I.1.13	38.63	1	8	8	47	catalytic activity	cytoplasm	metabolic process	321	33.1171	5.38916
A5CRF6	CMM_1613	Uncharacterized protein OS=Clavibacter michiganensis subsp. michiganensis (strain NCPPB 382) GN=CMM_1613 PE=4 SV=1 - [A5CRF6_CLAM3]	V.2.1	50.88	1	8	8	44				283	30.2281	4.79248
A5CR00	CMM_1459	Putative ribose 5-phosphate isomerase OS=Clavibacter michiganensis subsp. michiganensis (strain NCPPB 382) GN=rpiA PE=4 SV=1 - [A5CR00_CLAM3]	I.1.2	75.93	1	8	8	76	catalytic activity		metabolic process	162	17.2516	5.46533
A5CQ27	CMM_1137	Uncharacterized protein OS=Clavibacter michiganensis subsp. michiganensis (strain NCPPB 382) GN=CMM_1137 PE=4 SV=1 - [A5CQ27_CLAM3]	V.2.1	16.18	1	7	8	20				680	69.536	4.79248
A5CRZ3	CMM_1800	Uncharacterized protein OS=Clavibacter michiganensis subsp. michiganensis (strain NCPPB 382) GN=CMM_1800 PE=4 SV=1 - [A5CRZ3_CLAM3]	I.5.6	26.25	1	7	7	69				381	39.8062	5.18604
A5CT89	CMM_2245	Putative threonine dehydratase OS=Clavibacter michiganensis subsp. michiganensis (strain NCPPB 382) GN=ilvA PE=4 SV=1 - [A5CT89_CLAM3]	I.2.5	22.51	1	7	7	32	catalytic activity		metabolic process	422	44.4658	5.63037
A5CSQ4	CMM_2062	Putative DNA-binding ferritin-like protein OS=Clavibacter michiganensis subsp. michiganensis (strain NCPPB 382) GN=dpsB PE=3 SV=1 - [A5CSQ4_CLAM3]	IV.5.4	52.69	1	7	7	53	DNA binding; metal ion binding; catalytic activity		cellular homeostasis; response to stimulus; metabolic process	186	20.8663	4.86865
A5CRE0	CMM_1598	Putative membrane-bound acyltranferase OS=Clavibacter michiganensis subsp. michiganensis (strain NCPPB 382) GN=wcmG PE=4 SV=1 - [A5CRE0_CLAM3]	II.2.10	17.95	1	7	7	32	catalytic activity	membrane	metabolic process	730	77.1833	7.21045
A5CMT7	CMM_0351	Putative sugar ABC transporter, substrate binding protein OS=Clavibacter michiganensis subsp. michiganensis (strain NCPPB 382) GN=CMM_0351 PE=4 SV=1 - [A5CMT7_CLAM3]	IV.1.5	27.1	1	7	7	26				428	44.6163	4.65283
A5CVB8	CMM_2970	D-alanine--D-alanine ligase OS=Clavibacter michiganensis subsp. michiganensis (strain NCPPB 382) GN=ddlB PE=3 SV=1 - [A5CVB8_CLAM3]	II.2.1	20.25	1	7	7	28	nucleotide binding; metal ion binding; catalytic activity	cytoplasm	metabolic process; regulation of biological process; cell organization and biogenesis	321	33.0904	5.09717
A5CMN2	CMM_0296	Putative sugar ABC transporter, substrate-binding protein OS=Clavibacter michiganensis subsp. michiganensis (strain NCPPB 382) GN=CMM_0296 PE=4 SV=1 - [A5CMN2_CLAM3]	IV.1.5	29.53	1	7	7	29	transporter activity		transport	430	44.3177	4.55127
A5CMA6	CMM_0170	Putative tautomerase OS=Clavibacter michiganensis subsp. michiganensis (strain NCPPB 382) GN=CMM_0170 PE=4 SV=1 - [A5CMA6_CLAM3]	I.1.12	63.43	1	7	7	41	catalytic activity		metabolic process	134	14.6396	4.67822
A5CU76	CMM_2580	50S ribosomal protein L13 OS=Clavibacter michiganensis subsp. michiganensis (strain NCPPB 382) GN=rplM PE=3 SV=1 - [A5CU76_CLAM3]	III.3.1	76.35	1	7	8	61	structural molecule activity	ribosome	metabolic process	148	16.1395	9.67139
A5CPZ6	CMM_1106	Uncharacterized protein OS=Clavibacter michiganensis subsp. michiganensis (strain NCPPB 382) GN=CMM_1106 PE=4 SV=1 - [A5CPZ6_CLAM3]	V.2.1	42.8	1	7	7	39	catalytic activity		metabolic process	257	27.5391	4.90674
A5CQZ9	CMM_1458	Uncharacterized protein OS=Clavibacter michiganensis subsp. michiganensis (strain NCPPB 382) GN=CMM_1458 PE=4 SV=1 - [A5CQZ9_CLAM3]	V.2.1	48.08	1	7	7	65	catalytic activity		metabolic process	208	23.1147	4.91943
A5CS27	CMM_1835	Putative ubiquinol-cytochrome c reductase cytochrome c subunit OS=Clavibacter michiganensis subsp. michiganensis (strain NCPPB 382) GN=qcrC PE=4 SV=1 - [A5CS27_CLAM3]	I.1.4	58.27	1	7	7	142	metal ion binding			266	27.3577	5.07178
A5CLN6	pCM2_0025	Putative secreted protein OS=Clavibacter michiganensis subsp. michiganensis (strain NCPPB 382) GN=pCM2_0025 PE=4 SV=1 - [A5CLN6_CLAM3]	IV.2.5	36.4	1	6	6	29				261	26.6703	6.17627
A5CNQ6	CMM_0667	Putative secreted phosphoesterase OS=Clavibacter michiganensis subsp. michiganensis (strain NCPPB 382) GN=CMM_0667 PE=4 SV=1 - [A5CNQ6_CLAM3]	II.2.5	14.98	1	6	6	13	catalytic activity		metabolic process	641	67.9108	5.85889
A5CNS4	CMM_0685	Antimicrobial peptide ABC transporter, permease component OS=Clavibacter michiganensis subsp. michiganensis (strain NCPPB 382) GN=CMM_0685 PE=4 SV=1 - [A5CNS4_CLAM3]	IV.1.8	18.34	1	6	6	25		membrane		409	41.6908	4.61475
A5CQQ8	CMM_1367	30S ribosomal protein S16 OS=Clavibacter michiganensis subsp. michiganensis (strain NCPPB 382) GN=rpsP PE=3 SV=1 - [RS16_CLAM3]	III.3.1	67.15	1	6	7	34	structural molecule activity	ribosome	metabolic process	137	15.3382	9.24658
A5CR63	CMM_1521	Putative transcriptional regulator, LytR family OS=Clavibacter michiganensis subsp. michiganensis (strain NCPPB 382) GN=CMM_1521 PE=4 SV=1 - [A5CR63_CLAM3]	IV.3.1	16.09	1	6	6	23				435	44.7526	4.95752
A5CNI7	CMM_0599	Glutamate-1-semialdehyde 2,1-aminomutase OS=Clavibacter michiganensis subsp. michiganensis (strain NCPPB 382) GN=hemL PE=3 SV=1 - [GSA_CLAM3]	I.5.7	20.88	1	6	6	28	catalytic activity	cytoplasm	metabolic process	455	47.1022	5.19873
A5CPK0	CMM_0960	6,7-dimethyl-8-ribityllumazine synthase OS=Clavibacter michiganensis subsp. michiganensis (strain NCPPB 382) GN=ribH PE=3 SV=1 - [RISB_CLAM3]	I.5.3	36.88	1	6	6	35	catalytic activity		metabolic process	160	16.0095	5.10986
A5CUA6	CMM_2610	50S ribosomal protein L16 OS=Clavibacter michiganensis subsp. michiganensis (strain NCPPB 382) GN=rplP PE=3 SV=1 - [RL16_CLAM3]	III.3.1	58.27	1	6	6	42	RNA binding; structural molecule activity	ribosome	metabolic process	139	15.4333	10.6382
A5CT95	CMM_2250	Uncharacterized protein OS=Clavibacter michiganensis subsp. michiganensis (strain NCPPB 382) GN=CMM_2250 PE=4 SV=1 - [A5CT95_CLAM3]	V.2.2	21.2	1	6	6	84				764	74.4637	10.6089
A5CLR0	pCM2_0047	Uncharacterized protein OS=Clavibacter michiganensis subsp. michiganensis (strain NCPPB 382) GN=pCM2_0047 PE=4 SV=1 - [A5CLR0_CLAM3]	V.2.2	29.13	1	6	6	99				254	26.7686	8.93896
A5CLW7	CMM_0035	Putative dehydrogenase/oxidoreductase OS=Clavibacter michiganensis subsp. michiganensis (strain NCPPB 382) GN=CMM_0035 PE=4 SV=1 - [A5CLW7_CLAM3]	V.1.3	39.02	1	6	6	86	catalytic activity; nucleotide binding		metabolic process	369	38.3784	4.89404
A5CQG8	CMM_1277	Uncharacterized protein OS=Clavibacter michiganensis subsp. michiganensis (strain NCPPB 382) GN=CMM_1277 PE=4 SV=1 - [A5CQG8_CLAM3]	V.2.1	77.14	1	4	8	51				210	21.4958	5.23682
A5CRU2	CMM_1749	UvrABC system protein A OS=Clavibacter michiganensis subsp. michiganensis (strain NCPPB 382) GN=uvrA PE=3 SV=1 - [A5CRU2_CLAM3]	III.1.3	29.09	1	21	21	47	nucleotide binding; DNA binding; catalytic activity; metal ion binding	cytoplasm	metabolic process; response to stimulus; cell communication	973	106.535	6.0874
A5CN83	CMM_0496	Uncharacterized protein OS=Clavibacter michiganensis subsp. michiganensis (strain NCPPB 382) GN=CMM_0496 PE=4 SV=1 - [A5CN83_CLAM3]	V.2.1	34.15	1	14	14	29				571	61.9518	5.22412
A5CUK8	CMM_2711	Uncharacterized protein OS=Clavibacter michiganensis subsp. michiganensis (strain NCPPB 382) GN=CMM_2711 PE=4 SV=1 - [A5CUK8_CLAM3]	V.2.1	40	1	13	13	37				465	48.8084	6.21436
A5CRG1	CMM_1618	Beta-ketoacyl-[acyl-carrier-protein] synthase III OS=Clavibacter michiganensis subsp. michiganensis (strain NCPPB 382) GN=fabH PE=4 SV=1 - [A5CRG1_CLAM3]	I.4.1	53.41	1	13	13	36	catalytic activity	cytoplasm	metabolic process	337	35.2902	4.91943
A5CQI4	CMM_1292	Nicotinate phosphoribosyltransferase OS=Clavibacter michiganensis subsp. michiganensis (strain NCPPB 382) GN=pncB PE=3 SV=1 - [A5CQI4_CLAM3]	I.5.4	46.35	1	12	12	41	catalytic activity	cytoplasm	metabolic process	438	45.8336	5.74463
A5CPD3	CMM_0894	Putative nucleoside-diphosphate-sugar epimerase OS=Clavibacter michiganensis subsp. michiganensis (strain NCPPB 382) GN=CMM_0894 PE=4 SV=1 - [A5CPD3_CLAM3]	I.1.12	78.34	1	12	12	44	catalytic activity		metabolic process	217	22.7156	4.71631
A5CPB3	CMM_0872	Putative cystathionine beta-synthase OS=Clavibacter michiganensis subsp. michiganensis (strain NCPPB 382) GN=cysB PE=4 SV=1 - [A5CPB3_CLAM3]	I.2.8	44.49	1	12	12	62	catalytic activity; protein binding; nucleotide binding	cytoplasm	metabolic process	454	48.1545	4.91943
A5CS73	CMM_1881	Putative ATPase OS=Clavibacter michiganensis subsp. michiganensis (strain NCPPB 382) GN=CMM_1881 PE=4 SV=1 - [A5CS73_CLAM3]	II.1.2	57.41	1	11	11	37				270	29.1174	7.56201
A5CSB5	CMM_1923	GgtA protein OS=Clavibacter michiganensis subsp. michiganensis (strain NCPPB 382) GN=ggtA PE=4 SV=1 - [A5CSB5_CLAM3]	IV.5.8	30.02	1	11	11	37	catalytic activity		metabolic process	603	63.213	5.24951
A5CQJ9	CMM_1308	Peptide chain release factor RF-2 OS=Clavibacter michiganensis subsp. michiganensis (strain NCPPB 382) GN=prfB PE=4 SV=1 - [A5CQJ9_CLAM3]	III.3.3	52.86	1	11	11	70	RNA binding	cytoplasm	metabolic process; cell organization and biogenesis	367	40.8714	4.7417
A5CVB5	CMM_2967	Thioredoxin reductase OS=Clavibacter michiganensis subsp. michiganensis (strain NCPPB 382) GN=trxB1 PE=3 SV=1 - [A5CVB5_CLAM3]	IV.5.2	53.04	1	11	11	60	antioxidant activity; catalytic activity; nucleotide binding	cytoplasm	metabolic process; response to stimulus	345	36.2211	4.70361
A5CT25	CMM_2180	Putative peptide ABC transporter, substrate-binding protein OS=Clavibacter michiganensis subsp. michiganensis (strain NCPPB 382) GN=CMM_2180 PE=4 SV=1 - [A5CT25_CLAM3]	IV.1.4	22.53	1	10	10	25	transporter activity		transport	617	64.9954	4.69092
A5CPQ6	CMM_1016	Putative glycosyl transferase OS=Clavibacter michiganensis subsp. michiganensis (strain NCPPB 382) GN=wcqF PE=4 SV=1 - [A5CPQ6_CLAM3]	II.2.9	38.03	1	10	10	29	catalytic activity		metabolic process	284	30.962	7.45947
A5CQK9	CMM_1318	3-phosphoshikimate 1-carboxyvinyltransferase OS=Clavibacter michiganensis subsp. michiganensis (strain NCPPB 382) GN=aroA PE=3 SV=1 - [A5CQK9_CLAM3]	I.2.7	40.25	1	10	10	25	catalytic activity	cytoplasm	metabolic process	487	49.7629	4.89404
A5CT68	CMM_2223	Ribosome-binding ATPase YchF OS=Clavibacter michiganensis subsp. michiganensis (strain NCPPB 382) GN=ychF PE=3 SV=1 - [A5CT68_CLAM3]	III.3.5	46.22	1	10	10	37	nucleotide binding; transporter activity; catalytic activity		metabolic process; transport	357	38.6401	4.61475
A5CNI2	CMM_0594	Uncharacterized protein OS=Clavibacter michiganensis subsp. michiganensis (strain NCPPB 382) GN=CMM_0594 PE=4 SV=1 - [A5CNI2_CLAM3]	I.5.7	39.38	1	9	9	29				259	29.1566	5.021
A5CS25	CMM_1833	Anthranilate phosphoribosyltransferase OS=Clavibacter michiganensis subsp. michiganensis (strain NCPPB 382) GN=trpD PE=3 SV=1 - [TRPD_CLAM3]	I.2.7	35.33	1	9	9	24	metal ion binding; catalytic activity		metabolic process	351	36.6602	5.43994
A5CS43	CMM_1851	Pseudouridine synthase OS=Clavibacter michiganensis subsp. michiganensis (strain NCPPB 382) GN=CMM_1851 PE=3 SV=1 - [A5CS43_CLAM3]	III.3.4	40.66	1	9	9	28	RNA binding; catalytic activity		metabolic process	305	32.8858	6.29053
A5CQ44	CMM_1153	Homoserine dehydrogenase OS=Clavibacter michiganensis subsp. michiganensis (strain NCPPB 382) GN=thrA PE=3 SV=1 - [A5CQ44_CLAM3]	I.2.5	38.15	1	9	9	37	catalytic activity; nucleotide binding		metabolic process	443	45.8898	4.99561
A5CQ43	CMM_1152	Diaminopimelate decarboxylase OS=Clavibacter michiganensis subsp. michiganensis (strain NCPPB 382) GN=lysA PE=3 SV=1 - [A5CQ43_CLAM3]	I.2.5	25.45	1	9	9	27	catalytic activity		metabolic process	499	52.0617	5.23682
A5CTX9	CMM_2484	Uncharacterized protein OS=Clavibacter michiganensis subsp. michiganensis (strain NCPPB 382) GN=CMM_2484 PE=4 SV=1 - [A5CTX9_CLAM3]	IV.4.1	40.98	1	9	9	39				305	31.8401	5.51611
A5CPY5	CMM_1095	Putative acetolactate synthase, small (Regulatory) subunit OS=Clavibacter michiganensis subsp. michiganensis (strain NCPPB 382) GN=ilvH PE=4 SV=1 - [A5CPY5_CLAM3]	I.2.5	73.37	1	9	9	21	catalytic activity		metabolic process	169	18.3632	7.43018
A5CQ69	CMM_1178	Succinyl-diaminopimelate desuccinylase OS=Clavibacter michiganensis subsp. michiganensis (strain NCPPB 382) GN=dapE PE=4 SV=1 - [A5CQ69_CLAM3]	I.2.5	34.52	1	9	9	43	catalytic activity		metabolic process	365	39.1699	4.91943
A5CU48	CMM_2552	GlpQ1 protein OS=Clavibacter michiganensis subsp. michiganensis (strain NCPPB 382) GN=glpQ1 PE=4 SV=1 - [A5CU48_CLAM3]	I.4.1	30.97	1	9	9	29	catalytic activity		metabolic process	352	37.7312	5.47803
A5CLL9	pCM2_0008	Uncharacterized protein OS=Clavibacter michiganensis subsp. michiganensis (strain NCPPB 382) GN=pCM2_0008 PE=4 SV=1 - [A5CLL9_CLAM3]	V.2.2	45.74	1	9	9	35				317	33.8965	4.56396
A5CNW0	CMM_0721	Wzb protein OS=Clavibacter michiganensis subsp. michiganensis (strain NCPPB 382) GN=wzb PE=4 SV=1 - [A5CNW0_CLAM3]	II.2.7	48.54	1	9	9	29	catalytic activity		metabolic process	239	25.6921	5.85889
A5CVB7	CMM_2969	Putative transcriptional regulator containing an aminotransferase domain OS=Clavibacter michiganensis subsp. michiganensis (strain NCPPB 382) GN=CMM_2969 PE=4 SV=1 - [A5CVB7_CLAM3]	IV.3.1	34.55	1	9	9	39	catalytic activity		metabolic process	440	47.9026	5.05908
A5CQ26	CMM_1135	Putative F420-dependent NADP reductase OS=Clavibacter michiganensis subsp. michiganensis (strain NCPPB 382) GN=CMM_1135 PE=4 SV=1 - [A5CQ26_CLAM3]	V.1.3	57.87	1	9	9	39	catalytic activity		metabolic process	216	23.0477	4.70361
A5CMS1	CMM_0335	Conserved membrane protein OS=Clavibacter michiganensis subsp. michiganensis (strain NCPPB 382) GN=CMM_0335 PE=4 SV=1 - [A5CMS1_CLAM3]	V.2.1	20.53	1	8	8	16				604	63.0596	5.49072
A5CMV2	CMM_0366	Putative nucleoside-diphosphate-sugar epimerase OS=Clavibacter michiganensis subsp. michiganensis (strain NCPPB 382) GN=CMM_0366 PE=4 SV=1 - [A5CMV2_CLAM3]	I.1.12	40.98	1	8	8	25	catalytic activity		metabolic process	266	28.1655	5.32568
A5CP38	CMM_0799	Putative oligopeptide ABC transporter, substrate-binding lipoprotein OS=Clavibacter michiganensis subsp. michiganensis (strain NCPPB 382) GN=bldKB PE=4 SV=1 - [A5CP38_CLAM3]	IV.1.4	25.54	1	8	8	25	transporter activity		transport	560	58.9955	4.77979
A5CTZ8	CMM_2502	Mycothiol acetyltransferase OS=Clavibacter michiganensis subsp. michiganensis (strain NCPPB 382) GN=mshD PE=3 SV=1 - [MSHD_CLAM3]	V.1.4	34.64	1	8	8	36	catalytic activity		metabolic process	306	32.1057	5.07178
A5CP51	CMM_0812	Putative aldehyde dehydrogenase OS=Clavibacter michiganensis subsp. michiganensis (strain NCPPB 382) GN=CMM_0812 PE=4 SV=1 - [A5CP51_CLAM3]	V.1.3	27.27	1	8	8	31	catalytic activity		metabolic process	506	51.1568	5.17334
A5CU28	CMM_2532	Putative formyltetrahydrofolate deformylase OS=Clavibacter michiganensis subsp. michiganensis (strain NCPPB 382) GN=purU PE=4 SV=1 - [A5CU28_CLAM3]	I.3.1	45.86	1	8	8	26	catalytic activity		metabolic process	290	32.0905	6.22705
A5CNI8	CMM_0600	DNA/RNA endonuclease OS=Clavibacter michiganensis subsp. michiganensis (strain NCPPB 382) GN=CMM_0600 PE=4 SV=1 - [A5CNI8_CLAM3]	III.2.2	45.05	1	8	8	37	catalytic activity; metal ion binding		metabolic process	273	30.0211	4.70361
A5CLU1	CMM_0009	Uncharacterized protein OS=Clavibacter michiganensis subsp. michiganensis (strain NCPPB 382) GN=CMM_0009 PE=4 SV=1 - [A5CLU1_CLAM3]	V.2.2	45.75	1	8	8	27				212	22.4099	9.39307
A5CNA3	CMM_0516	Putative hydrolase, HAD superfamily OS=Clavibacter michiganensis subsp. michiganensis (strain NCPPB 382) GN=CMM_0516 PE=4 SV=1 - [A5CNA3_CLAM3]	V.1.6	34.07	1	8	8	33	catalytic activity		metabolic process	273	29.802	4.85596
A5CUB4	CMM_2618	30S ribosomal protein S10 OS=Clavibacter michiganensis subsp. michiganensis (strain NCPPB 382) GN=rpsJ PE=3 SV=1 - [RS10_CLAM3]	III.3.1	58.82	1	8	8	40	RNA binding; structural molecule activity	ribosome	metabolic process	102	11.5052	9.5835
A5CTL1	CMM_2365	Putative hydrolase OS=Clavibacter michiganensis subsp. michiganensis (strain NCPPB 382) GN=CMM_2365 PE=4 SV=1 - [A5CTL1_CLAM3]	V.1.6	33.92	1	8	8	30	catalytic activity		metabolic process	286	31.589	5.12256
A5CP99	CMM_0860	50S ribosomal protein L10 OS=Clavibacter michiganensis subsp. michiganensis (strain NCPPB 382) GN=rplJ PE=3 SV=1 - [A5CP99_CLAM3]	III.3.1	57.31	1	8	8	38	RNA binding; structural molecule activity	ribosome	metabolic process	171	18.1647	8.85107
A5CRK0	CMM_1657	Uncharacterized protein OS=Clavibacter michiganensis subsp. michiganensis (strain NCPPB 382) GN=CMM_1657 PE=4 SV=1 - [A5CRK0_CLAM3]	V.2.1	53.48	1	8	8	44				230	24.0903	4.80518
A5CUG1	CMM_2665	Uncharacterized protein OS=Clavibacter michiganensis subsp. michiganensis (strain NCPPB 382) GN=CMM_2665 PE=4 SV=1 - [A5CUG1_CLAM3]	V.2.1	35.21	1	7	7	23				284	30.5484	5.13525
A5CPS0	CMM_1030	Putative glycosyl transferase OS=Clavibacter michiganensis subsp. michiganensis (strain NCPPB 382) GN=wcqR PE=4 SV=1 - [A5CPS0_CLAM3]	II.2.9	12.49	1	7	7	22	catalytic activity		metabolic process	1025	105.743	6.68311
A5CSJ2	CMM_1997	Ornithine carbamoyltransferase OS=Clavibacter michiganensis subsp. michiganensis (strain NCPPB 382) GN=argF PE=3 SV=1 - [OTC_CLAM3]	I.2.3	37.79	1	7	7	27	catalytic activity	cytoplasm	metabolic process	307	32.9918	4.86865
A5CUR6	CMM_2769	Uncharacterized protein OS=Clavibacter michiganensis subsp. michiganensis (strain NCPPB 382) GN=CMM_2769 PE=4 SV=1 - [A5CUR6_CLAM3]	V.2.1	32.05	1	7	7	30		membrane	metabolic process	312	33.9405	4.76709
A5CPX6	CMM_1086	Trehalose 6-phosphate phosphatase OS=Clavibacter michiganensis subsp. michiganensis (strain NCPPB 382) GN=otsB PE=3 SV=1 - [A5CPX6_CLAM3]	I.1.5	36.73	1	7	7	26	catalytic activity; metal ion binding		metabolic process	275	29.3943	4.77979
A5CQK7	CMM_1316	Putative monophosphatase OS=Clavibacter michiganensis subsp. michiganensis (strain NCPPB 382) GN=CMM_1316 PE=4 SV=1 - [A5CQK7_CLAM3]	V.1.6	41.85	1	7	7	22			metabolic process	270	29.0957	4.86865
A5CUT4	CMM_2787	50S ribosomal protein L11 OS=Clavibacter michiganensis subsp. michiganensis (strain NCPPB 382) GN=rplK PE=3 SV=1 - [RL11_CLAM3]	III.3.1	40.56	1	7	7	41	RNA binding; structural molecule activity	ribosome	metabolic process	143	15.0361	9.39307
A5CVB0	CMM_2962	Single-stranded DNA-binding protein OS=Clavibacter michiganensis subsp. michiganensis (strain NCPPB 382) GN=ssb PE=4 SV=1 - [A5CVB0_CLAM3]	III.1.1	37.16	1	7	7	65	DNA binding		metabolic process	183	19.0723	5.17334
[truncated: 391 more rows]

## Sheet: Table S5. XMM total
Accession	Gene Name	Description	COG	ΣCoverage	Σ# Proteins	Σ# Unique Peptides	Σ# Peptides	Σ# PSMs	Molecular Function	Cellular Component	Biological Process	# AAs	MW [kDa]	calc. pI
[truncated: 969 more rows]
